# Supplementary material for: A Computational Framework for Analyzing Stochasticity in Gene Expression
Source: PLoS Comput Biol. 2014 May 8;10(5):e1003596. doi: 10.1371/journal.pcbi.1003596 (PMC4014403; doi:10.1371/journal.pcbi.1003596)
Supplement: Data S1 — ACES library data. ACES was run for each of the 8053 library members, generating a list of solutions. The summary data for each ACES run is described is included in the excel spreadsheet. Data S1 is the source of the library summary results reported in Table 1. A more detailed explanation of each datasheet and column can be found in the README datasheet within Data S1. (XLSX) [file pcbi.1003596.s001.xlsx]

## Sheet: README
README for ACES_library_data.xlsx from "A computational framework for analyzing stochasticity in gene expression."
There are 6 datasheets comprising summary results for each library member fit by ACES under different conditions. These data were used to populate Table 1 in the manuscript. In order:
1. MVSK - Fitting ACES on 8053 library members using mean, variance, skewness and kurtosis constraints
2. MVSK_dm - Fitting ACES on 8053 library members using mean, variance, skewness and kurtosis moment constraints, and d_m is given
3. MVSK_dp - Fitting ACES on 8053 library members using mean, variance, skewness and kurtosis moment constraints, and d_p is given
4. MVSK_dm_dp - Fitting ACES on 8053 library members using mean, variance, skewness and kurtosis moment constraints, and both d_m and d_p are given
5. MV - Fitting ACES on 8053 library members using mean and variance moment constraints
6. MVS - Fitting ACES on 8053 library members using mean, variance, and skewness moment constraints
For all of the above datasheets, the columns are as follows.
COLUMNS A through AI alternate:
CDRC or ratio input value	CDRC median log distance from solution ensemble (MD)
(denoted by the name, e.g., "ton")	(denoted _median_rel_dist)	ALL INPUT ENTRIES ARE IN NATURAL LOG. Median log values are already in log space.
COLUMNS AK through AO
Quantities of interest, not fit by ACES. These represent the input values for the various quantities. For example, one could ask whether mean protein level correlates with fitting certain CDRCs
Columns AP through AT
num_params_fit - number of CDRCs fit. Note that when dm or dp or both are given, these are counted. In Table one, these numbers are corrected to not include CDRCs given beforehand
num_param_rat_fit - number of CDRCs fit + number of ratios fit. Note that we tested other ratios as well, but some were fit only when their individual CDRCs were fit, and were therefore not discussed in the paper.
avg_true_param_fit - average MD of CDRCs only.
num_param_sets - number of output CDRC sets from ACES' fit
file_num - the ID of the library member (1 through 8053)
The following columns are only in the MVSK datasheet. See supplement for the derivation of these numbers.
fr_pred_sk	This is the predicted skewness given gamma distributed with params a,b
my_skew	Actual distribution skewness (analytically derived)
rel_skew_err	relative error between gamma predicted skew and actual skew
fr_pred_ex_kurt	This is the predicted excess kurtosis given gamma distributed with params a,b
my_kurt	Actual distribution excess kurtosis (analytically derived)
rel_err_kurt	relative error between gamma predicted excess kurtosis and actual excess kurtosis
fr_kmdp	Friedman solution derived km/dp
fr_kpdm	Friedman solution derived kp/dm
err_frkmdp	relative error between gamma predicted km/dp and actual km/dp
err_frkpdm	relative error between gamma predicted kp/dm and actual kp/dm
Datasheet "rel_err_ACES_vs_Friedman"
This is relative error of the mean value (if more than one solution for ACES) in estimating various parameters in the Friedman regime, versus the Friedman model estimations of km/dp and kp/dm.
Note, all CDRCs and ratios containing ton and toff are not listed since the Friedman regime only captures situations where the gene is always on.

## Sheet: MVSK
ton	ton_median_rel_dist	toff	toff_median_rel_dist	km	km_median_rel_dist	dm	dm_median_rel_dist	kp	kp_median_rel_dist	dp	dp_median_rel_dist	S	S_median_rel_dist	B	B_median_rel_dist	P_ON	P_ON_median_rel_dist	E[RNA ct]	E[RNA ct]_median_rel_dist	kp / dp	kp / dp_median_rel_dist	S / dp	S / dp_median_rel_dist	burst frequency	burst frequency_median_rel_dist	kp/dm	kp/dm_median_rel_dist	ton/dm	ton/dm_median_rel_dist	ton/dp	ton/dp_median_rel_dist	toff/dm	toff/dm_median_rel_dist	toff/dp	toff/dp_median_rel_dist	avg_protein_ct	TON+TOFF	dp / dm	dp + dm	RNA_fano	num_params_fit	num_param_rat_fit	avg_true_param_fit	num_param_sets	file_num	fr_pred_sk	my_skew	rel_skew_err	fr_pred_ex_kurt
-6.5023	1.7668	-6.5023	1.6848	-4.1997	1.6711	-6.9675	1.7233	-0.28768	2.7408	-7.3008	2.828	-4.8929	1.7083	2.3026	0.16662	-0.69315	0.069323	2.0747	0.66305	7.0131	0.66305	2.4079	0.46025	-7.1954	1.6995	6.6798	0.46025	0.46522	0.64936	0.79851	0.39722	0.46522	0.74749	0.79851	0.34813	9.0878	-5.8091	-0.33329	-14.268	1.0656	0	10	2.0691	2450	1	0.84348	0.33326	1.531	1.0672
-6.5023	1.5116	-6.5023	1.4156	-4.1997	1.5113	-6.9675	2.197	-0.28768	2.6271	-5.577	1.9479	-4.8929	1.5441	2.3026	0.10039	-0.69315	0.050712	2.0747	0.23049	5.2893	0.23049	0.68412	1.1333	-7.1954	1.4335	6.6798	1.1333	0.46522	0.15532	-0.92532	1.1021	0.46522	0.19176	-0.92532	0.90315	7.3639	-5.8091	1.3905	-12.544	1.0656	0	6	1.8684	2132	2	1.1298	0.42899	1.6336	1.9146
-6.5023	2.1525	-6.5023	2.1146	-4.1997	2.2301	-6.9675	3.2981	-0.28768	2.2859	-3.8531	1.7675	-4.8929	2.2384	2.3026	0.093029	-0.69315	0.049598	2.0747	0.21352	3.5655	0.21351	-1.0397	2.1509	-7.1954	2.1306	6.6798	2.1509	0.46522	0.16181	-2.6491	2.1691	0.46522	0.16001	-2.6491	2.1721	5.6401	-5.8091	3.1144	-10.821	1.0656	0	6	2.3081	3125	3	1.2025	0.47973	1.5067	2.1691
-6.5023	3.032	-6.5023	2.8682	-4.1997	2.9762	-6.9675	4.8838	-0.28768	1.3142	-2.1293	1.2529	-4.8929	2.9827	2.3026	0.1256	-0.69315	0.055923	2.0747	0.51038	1.8416	0.51037	-2.7635	4.1157	-7.1954	2.8983	6.6798	4.1157	0.46522	0.48649	-4.373	4.1171	0.46522	0.51535	-4.373	4.0347	3.9163	-5.8091	4.8382	-9.0968	1.0656	0	6	2.7212	439	4	1.2385	0.53495	1.3151	2.3007
-6.5023	1.3755	-6.5023	1.3754	-4.1997	1.4023	-6.9675	1.2752	0.68471	2.0169	-7.3008	2.0763	-4.8929	1.38	2.3026	0.1428	-0.69315	0.082321	2.0747	0.62116	7.9855	0.62116	2.4079	0.37324	-7.1954	1.3376	7.6522	0.37325	0.46522	0.55993	0.79851	0.30851	0.46522	0.6963	0.79851	0.2766	10.06	-5.8091	-0.33329	-14.268	1.0656	0	10	1.5869	1830	5	0.84332	0.33296	1.5328	1.0668
-6.5023	1.1008	-6.5023	1.0435	-4.1997	1.1665	-6.9675	1.7567	0.68471	1.8491	-5.577	1.2502	-4.8929	1.1749	2.3026	0.104	-0.69315	0.039639	2.0747	0.25657	6.2617	0.25657	0.68412	1.0226	-7.1954	1.0689	7.6522	1.0226	0.46522	0.18698	-0.92532	0.96801	0.46522	0.19495	-0.92532	0.84547	8.3363	-5.8091	1.3905	-12.544	1.0656	0	6	1.3611	1696	6	1.1291	0.42769	1.64	1.9122
-6.5023	1.633	-6.5023	1.5592	-4.1997	1.7685	-6.9675	2.9103	0.68471	1.7176	-3.8531	1.6056	-4.8929	1.7103	2.3026	0.10686	-0.69315	0.051708	2.0747	0.28055	4.5379	0.28055	-1.0397	2.2702	-7.1954	1.5961	7.6522	2.2702	0.46522	0.2979	-2.6491	2.2659	0.46522	0.27619	-2.6491	2.2612	6.6125	-5.8091	3.1144	-10.821	1.0656	0	6	1.8657	373	7	1.1988	0.4731	1.534	2.1559
-6.5023	2.4113	-6.5023	2.3463	-4.1997	2.4931	-6.9675	4.2616	0.68471	1.0339	-2.1293	1.2937	-4.8929	2.5026	2.3026	0.11295	-0.69315	0.054514	2.0747	0.50887	2.814	0.50886	-2.7635	4.075	-7.1954	2.3755	7.6522	4.075	0.46522	0.45611	-4.373	4.0565	0.46522	0.50678	-4.373	4.033	4.8887	-5.8091	4.8382	-9.0968	1.0656	0	6	2.3066	441	8	1.2183	0.50069	1.4332	2.2264
-6.5023	1.0091	-6.5023	1.0146	-4.1997	1.045	-6.9675	0.87906	1.6571	1.4007	-7.3008	1.5446	-4.8929	1.03	2.3026	0.14617	-0.69315	0.083318	2.0747	0.58024	8.9579	0.58024	2.4079	0.34811	-7.1954	0.99304	8.6246	0.34811	0.46522	0.49029	0.79851	0.29012	0.46522	0.61798	0.79851	0.24736	11.033	-5.8091	-0.33329	-14.268	1.0656	0	10	1.1489	10622	9	0.84325	0.33284	1.5335	1.0666
-6.5023	0.82309	-6.5023	0.71078	-4.1997	0.85212	-6.9675	1.3388	1.6571	1.2684	-5.577	0.96696	-4.8929	0.87725	2.3026	0.10541	-0.69315	0.03972	2.0747	0.24306	7.2341	0.24306	0.68412	0.91541	-7.1954	0.777	8.6246	0.91541	0.46522	0.19664	-0.92532	0.88507	0.46522	0.21426	-0.92532	0.79176	9.3087	-5.8091	1.3905	-12.544	1.0656	1	7	0.99336	1141	10	1.1288	0.4272	1.6424	1.9114
-6.5023	1.232	-6.5023	1.1343	-4.1997	1.2451	-6.9675	2.1404	1.6571	1.1565	-3.8531	1.2309	-4.8929	1.2855	2.3026	0.085323	-0.69315	0.03941	2.0747	0.27468	5.5102	0.27468	-1.0397	2.1157	-7.1954	1.1675	8.6246	2.1157	0.46522	0.28173	-2.6491	2.1115	0.46522	0.24908	-2.6491	2.1292	7.5849	-5.8091	3.1144	-10.821	1.0656	0	6	1.3565	2150	11	1.1975	0.47057	1.5447	2.1508
-6.5023	2.1193	-6.5023	2.0753	-4.1997	2.1308	-6.9675	3.5085	1.6571	1.1465	-2.1293	1.4408	-4.8929	2.1934	2.3026	0.11153	-0.69315	0.051111	2.0747	0.31025	3.7864	0.31025	-2.7635	3.683	-7.1954	2.1087	8.6246	3.683	0.46522	0.26515	-4.373	3.7728	0.46522	0.26608	-4.373	3.7198	5.861	-5.8091	4.8382	-9.0968	1.0656	0	6	2.0702	405	12	1.2106	0.48707	1.4854	2.1983
-6.5023	2.8596	-6.5023	2.7403	-4.1997	2.7347	-6.9675	4.6764	1.6571	0.80253	-0.40546	1.7652	-4.8929	2.8661	2.3026	0.12879	-0.69315	0.055017	2.0747	0.59156	2.0625	0.59156	-4.4874	5.8338	-7.1954	2.7781	8.6246	5.8338	0.46522	0.54141	-6.0968	5.8674	0.46522	0.5662	-6.0968	5.7597	4.1372	-5.8091	6.562	-7.373	1.0656	0	6	2.5964	441	13	1.2335	0.52592	1.3453	2.2821
-6.5023	0.49511	-6.5023	0.41354	-4.1997	0.49485	-6.9675	0.93302	2.6295	0.65916	-5.577	0.64189	-4.8929	0.53994	2.3026	0.088691	-0.69315	0.042874	2.0747	0.24675	8.2065	0.24675	0.68412	0.81093	-7.1954	0.44769	9.597	0.81093	0.46522	0.25469	-0.92532	0.77845	0.46522	0.25687	-0.92532	0.74213	10.281	-5.8091	1.3905	-12.544	1.0656	5	14	0.60626	5559	14	1.1287	0.42701	1.6433	1.911
-6.5023	0.92443	-6.5023	0.8738	-4.1997	0.93072	-6.9675	1.6735	2.6295	0.78586	-3.8531	0.95843	-4.8929	0.9695	2.3026	0.08218	-0.69315	0.039175	2.0747	0.30725	6.4826	0.30725	-1.0397	2.1603	-7.1954	0.89475	9.597	2.1603	0.46522	0.31332	-2.6491	2.1436	0.46522	0.28774	-2.6491	2.1686	8.5573	-5.8091	3.1144	-10.821	1.0656	0	6	1.0245	1445	15	1.1969	0.46961	1.5488	2.1489
-6.5023	1.5979	-6.5023	1.4764	-4.1997	1.5595	-6.9675	2.3639	2.6295	0.96749	-2.1293	1.2684	-4.8929	1.5838	2.3026	0.086573	-0.69315	0.038484	2.0747	0.2793	4.7588	0.2793	-2.7635	3.5711	-7.1954	1.5106	9.597	3.5711	0.46522	0.21167	-4.373	3.6307	0.46522	0.21371	-4.373	3.6375	6.8334	-5.8091	4.8382	-9.0968	1.0656	0	6	1.5389	2649	16	1.2077	0.48182	1.5064	2.1877
-6.5023	2.2317	-6.5023	2.0519	-4.1997	2.1308	-6.9675	4.0541	2.6295	1.0297	-0.40546	2.179	-4.8929	2.2615	2.3026	0.12073	-0.69315	0.053473	2.0747	0.44254	3.0349	0.44254	-4.4874	5.6978	-7.1954	2.0986	9.597	5.6979	0.46522	0.42816	-6.0968	5.7212	0.46522	0.4221	-6.0968	5.6607	5.1096	-5.8091	6.562	-7.373	1.0656	0	6	2.2795	433	17	1.2173	0.49809	1.4438	2.2226
-6.5023	0.23212	-6.5023	0.23448	-4.1997	0.22333	-6.9675	0.46599	3.6019	0.26645	-5.577	0.51001	-4.8929	0.23259	2.3026	0.096142	-0.69315	0.040326	2.0747	0.22652	9.1788	0.22652	0.68412	0.71339	-7.1954	0.23198	10.569	0.71339	0.46522	0.27651	-0.92532	0.68819	0.46522	0.26099	-0.92532	0.6581	11.253	-5.8091	1.3905	-12.544	1.0656	6	18	0.32206	243	18	1.1287	0.42694	1.6437	1.9109
-6.5023	0.57393	-6.5023	0.53509	-4.1997	0.53772	-6.9675	1.1505	3.6019	0.56448	-3.8531	1.203	-4.8929	0.60039	2.3026	0.078599	-0.69315	0.03937	2.0747	0.337	7.455	0.337	-1.0397	2.1837	-7.1954	0.55268	10.569	2.1837	0.46522	0.32188	-2.6491	2.1875	0.46522	0.33009	-2.6491	2.1833	9.5297	-5.8091	3.1144	-10.821	1.0656	4	12	0.76078	879	19	1.1967	0.46924	1.5503	2.1482
-6.5023	1.2617	-6.5023	1.1344	-4.1997	1.1665	-6.9675	2.0088	3.6019	1.0494	-2.1293	1.8685	-4.8929	1.2527	2.3026	0.086071	-0.69315	0.039006	2.0747	0.32437	5.7312	0.32437	-2.7635	3.7219	-7.1954	1.1926	10.569	3.7219	0.46522	0.26284	-4.373	3.7748	0.46522	0.26937	-4.373	3.7729	7.8058	-5.8091	4.8382	-9.0968	1.0656	0	6	1.4149	1903	20	1.2066	0.47982	1.5146	2.1836
-6.5023	1.8386	-6.5023	1.6891	-4.1997	1.8892	-6.9675	3.2102	3.6019	1.3142	-0.40546	2.4031	-4.8929	1.9949	2.3026	0.11169	-0.69315	0.050866	2.0747	0.28047	4.0073	0.28047	-4.4874	5.2564	-7.1954	1.7295	10.569	5.2564	0.46522	0.20591	-6.0968	5.2887	0.46522	0.20268	-6.0968	5.2957	6.082	-5.8091	6.562	-7.373	1.0656	0	6	2.0574	358	21	1.2111	0.48713	1.4861	2.2
-6.5023	2.5988	-6.5023	2.9424	-4.1997	3.2178	-5.0441	1.6122	-0.28768	2.2887	-7.3008	4.169	-4.8929	2.9049	2.3026	0.14585	-0.69315	0.24534	0.15129	2.5239	7.0131	2.5239	2.4079	0.47051	-7.1954	2.7312	4.7565	0.47051	-1.4581	2.0722	0.79851	0.71368	-1.4581	2.626	0.79851	0.29761	7.1644	-5.8091	-2.2567	-12.345	0.58439	0	6	2.8048	1058	22	1.0206	0.49539	1.0601	1.5623
-6.5023	1.306	-6.5023	1.4555	-4.1997	1.4061	-5.0441	1.299	-0.28768	2.518	-5.577	2.7469	-4.8929	1.3141	2.3026	0.22663	-0.69315	0.1433	0.15129	0.91078	5.2893	0.91078	0.68412	0.79477	-7.1954	1.3477	4.7565	0.79477	-1.4581	1.022	-0.92532	0.64133	-1.4581	1.2904	-0.92532	0.41186	5.4406	-5.8091	-0.53283	-10.621	0.58439	0	4	1.7886	765	23	1.805	0.89193	1.0237	4.8872
-6.5023	1.2879	-6.5023	1.1785	-4.1997	1.7685	-5.0441	2.2356	-0.28768	2.4607	-3.8531	2.0219	-4.8929	1.7958	2.3026	0.3621	-0.69315	0.060431	0.15129	0.29168	3.5655	0.29168	-1.0397	0.91018	-7.1954	1.2079	4.7565	0.91018	-1.4581	0.49771	-2.6491	0.66235	-1.4581	0.76116	-2.6491	0.76806	3.7167	-5.8091	1.191	-8.8973	0.58439	0	6	1.8255	2619	24	2.3206	1.2164	0.90776	8.0777
-6.5023	2.1235	-6.5023	2.5409	-4.1997	2.7347	-5.0441	1.3072	0.68471	1.5456	-7.3008	3.5152	-4.8929	2.5042	2.3026	0.17064	-0.69315	0.24706	0.15129	2.4813	7.9855	2.4813	2.4079	0.43264	-7.1954	2.3372	5.7289	0.43264	-1.4581	1.9676	0.79851	0.63887	-1.4581	2.5566	0.79851	0.27742	8.1368	-5.8091	-2.2567	-12.345	0.58439	0	6	2.2945	854	25	1.0196	0.49393	1.0643	1.5595
-6.5023	0.91223	-6.5023	1.1486	-4.1997	1.0438	-5.0441	1.0754	0.68471	1.8322	-5.577	2.0797	-4.8929	0.9085	2.3026	0.2142	-0.69315	0.14423	0.15129	0.8362	6.2617	0.83619	0.68412	0.69224	-7.1954	1.0442	5.7289	0.69224	-1.4581	0.98092	-0.92532	0.53078	-1.4581	1.2349	-0.92532	0.33487	6.413	-5.8091	-0.53283	-10.621	0.58439	0	6	1.3487	522	26	1.802	0.8874	1.0307	4.871
-6.5023	0.9378	-6.5023	0.89399	-4.1997	1.4061	-5.0441	1.7159	0.68471	2.0042	-3.8531	1.6837	-4.8929	1.4177	2.3026	0.27945	-0.69315	0.058519	0.15129	0.26901	4.5379	0.26901	-1.0397	0.88935	-7.1954	0.91164	5.7289	0.88935	-1.4581	0.43218	-2.6491	0.60117	-1.4581	0.67347	-2.6491	0.68826	4.6891	-5.8091	1.191	-8.8973	0.58439	0	8	1.4403	1910	27	2.3075	1.1978	0.92645	7.987
-6.5023	1.6085	-6.5023	2.0641	-4.1997	2.3723	-5.0441	1.1845	1.6571	1.2038	-7.3008	2.7656	-4.8929	2.0684	2.3026	0.26314	-0.69315	0.25752	0.15129	2.4751	8.9579	2.4751	2.4079	0.43597	-7.1954	1.817	6.7012	0.43598	-1.4581	1.9027	0.79851	0.58783	-1.4581	2.5018	0.79851	0.26313	9.1092	-5.8091	-2.2567	-12.345	0.58439	0	6	1.8665	718	28	1.0193	0.49338	1.0659	1.5584
-6.5023	0.64865	-6.5023	0.80742	-4.1997	0.80228	-5.0441	0.86461	1.6571	1.2038	-5.577	1.4543	-4.8929	0.66716	2.3026	0.21252	-0.69315	0.1435	0.15129	0.74469	7.2341	0.74469	0.68412	0.61206	-7.1954	0.77828	6.7012	0.61206	-1.4581	0.89892	-0.92532	0.45382	-1.4581	1.1203	-0.92532	0.27447	7.3853	-5.8091	-0.53283	-10.621	0.58439	1	10	0.9635	340	29	1.8009	0.88567	1.0334	4.8649
-6.5023	0.59633	-6.5023	0.52608	-4.1997	1.0438	-5.0441	1.3011	1.6571	1.4331	-3.8531	1.1317	-4.8929	1.0737	2.3026	0.27096	-0.69315	0.056564	0.15129	0.24054	5.5102	0.24054	-1.0397	0.74333	-7.1954	0.55835	6.7012	0.74334	-1.4581	0.40341	-2.6491	0.48677	-1.4581	0.61927	-2.6491	0.51724	5.6615	-5.8091	1.191	-8.8973	0.58439	2	13	1.0054	1183	30	2.3026	1.1907	0.93386	7.9527
-6.5023	0.90148	-6.5023	0.72612	-4.1997	1.8308	-5.0441	2.472	1.6571	1.213	-2.1293	1.0247	-4.8929	1.894	2.3026	0.79349	-0.69315	0.094263	0.15129	0.30397	3.7864	0.30397	-2.7635	1.6236	-7.1954	0.79451	6.7012	1.6236	-1.4581	1.0287	-4.373	0.9138	-1.4581	1.3244	-4.373	0.91233	3.9377	-5.8091	2.9148	-7.1734	0.58439	1	4	1.3614	25329	31	2.4629	1.3051	0.88711	9.0988
-6.5023	1.0754	-6.5023	1.5382	-4.1997	1.8308	-5.0441	1.0117	2.6295	0.82076	-7.3008	2.0762	-4.8929	1.543	2.3026	0.23501	-0.69315	0.29909	0.15129	2.4845	9.9303	2.4845	2.4079	0.39149	-7.1954	1.283	7.6736	0.39149	-1.4581	1.8561	0.79851	0.5669	-1.4581	2.4653	0.79851	0.23727	10.082	-5.8091	-2.2567	-12.345	0.58439	0	6	1.3922	3916	32	1.0191	0.49317	1.0665	1.5579
-6.5023	0.37686	-6.5023	0.48193	-4.1997	0.3932	-5.0441	0.68117	2.6295	0.65762	-5.577	0.98087	-4.8929	0.40413	2.3026	0.2097	-0.69315	0.11081	0.15129	0.68139	8.2065	0.68139	0.68412	0.48921	-7.1954	0.39322	7.6736	0.48921	-1.4581	0.82699	-0.92532	0.31351	-1.4581	1.0436	-0.92532	0.22065	8.3577	-5.8091	-0.53283	-10.621	0.58439	5	15	0.59528	1400	33	1.8005	0.88502	1.0344	4.8626
-6.5023	0.3373	-6.5023	0.30745	-4.1997	0.56073	-5.0441	0.87583	2.6295	0.7473	-3.8531	0.645	-4.8929	0.61991	2.3026	0.26072	-0.69315	0.054921	0.15129	0.21618	6.4826	0.21618	-1.0397	0.61618	-7.1954	0.30899	7.6736	0.61618	-1.4581	0.37378	-2.6491	0.41023	-1.4581	0.58524	-2.6491	0.44404	6.6339	-5.8091	1.191	-8.8973	0.58439	5	17	0.57893	563	34	2.3007	1.1879	0.9367	7.9398
-6.5023	0.63894	-6.5023	0.51107	-4.1997	1.4061	-5.0441	1.8196	2.6295	0.7431	-2.1293	0.66946	-4.8929	1.4205	2.3026	0.62098	-0.69315	0.059527	0.15129	0.27505	4.7588	0.27505	-2.7635	1.5325	-7.1954	0.55142	7.6736	1.5325	-1.4581	0.78281	-4.373	0.94789	-1.4581	1.0197	-4.373	0.84721	4.9101	-5.8091	2.9148	-7.1734	0.58439	4	9	0.96473	1854	35	2.453	1.2912	0.89974	9.026
-6.5023	0.77631	-6.5023	1.2822	-4.1997	1.6477	-5.0441	0.93046	3.6019	0.62635	-7.3008	1.5237	-4.8929	1.3072	2.3026	0.32695	-0.69315	0.32852	0.15129	2.4464	10.903	2.4464	2.4079	0.39806	-7.1954	1.0261	8.646	0.39806	-1.4581	1.8037	0.79851	0.54041	-1.4581	2.427	0.79851	0.23862	11.054	-5.8091	-2.2567	-12.345	0.58439	1	7	1.1311	352	36	1.0191	0.49309	1.0667	1.5578
-6.5023	0.23452	-6.5023	0.23513	-4.1997	0.24826	-5.0441	0.56878	3.6019	0.25624	-5.577	0.45489	-4.8929	0.26101	2.3026	0.19174	-0.69315	0.1015	0.15129	0.57044	9.1788	0.57044	0.68412	0.4283	-7.1954	0.2256	8.646	0.42829	-1.4581	0.70251	-0.92532	0.2959	-1.4581	0.90907	-0.92532	0.17455	9.3301	-5.8091	-0.53283	-10.621	0.58439	6	17	0.33297	606	37	1.8003	0.88477	1.0348	4.8618
-6.5023	0.20445	-6.5023	0.23429	-4.1997	0.30193	-5.0441	0.44943	3.6019	0.22873	-3.8531	0.3196	-4.8929	0.31776	2.3026	0.20694	-0.69315	0.042075	0.15129	0.18315	7.455	0.18315	-1.0397	0.50009	-7.1954	0.21504	8.646	0.50009	-1.4581	0.30268	-2.6491	0.3537	-1.4581	0.45289	-2.6491	0.37056	7.6063	-5.8091	1.191	-8.8973	0.58439	6	18	0.28974	1351	38	2.3	1.1869	0.93777	7.9348
-6.5023	0.33355	-6.5023	0.28513	-4.1997	0.92305	-5.0441	1.1983	3.6019	0.33973	-2.1293	0.60461	-4.8929	0.89586	2.3026	0.46097	-0.69315	0.055712	0.15129	0.24954	5.7312	0.24953	-2.7635	1.5525	-7.1954	0.28323	8.646	1.5525	-1.4581	0.62481	-4.373	1.1085	-1.4581	0.79292	-4.373	0.98554	5.8825	-5.8091	2.9148	-7.1734	0.58439	4	10	0.61407	821	39	2.4493	1.2859	0.90469	8.9986
-6.5023	0.71874	-6.5023	0.52006	-4.1997	1.6477	-5.0441	2.2345	3.6019	0.62635	-0.40546	1.1276	-4.8929	1.72	2.3026	0.78884	-0.69315	0.10071	0.15129	0.29557	4.0073	0.29557	-4.4874	3.1229	-7.1954	0.62922	8.646	3.1229	-1.4581	0.98546	-6.0968	2.2693	-1.4581	1.2902	-6.0968	2.0895	4.1586	-5.8091	4.6387	-5.4496	0.58439	3	7	1.1458	2872	40	2.4895	1.3188	0.88775	9.2964
-6.5023	3.4012	-6.5023	3.7424	-4.1997	3.7009	-3.1208	1.8689	-0.28768	1.6582	-7.3008	5.1891	-4.8929	3.4989	2.3026	0.12826	-0.69315	0.26638	-1.7721	4.1451	7.0131	4.1451	2.4079	0.34543	-7.1954	3.546	2.8331	0.34542	-3.3815	3.6967	0.79851	0.47485	-3.3815	4.3264	0.79851	0.2731	5.241	-5.8091	-4.18	-10.422	0.14769	0	6	3.2601	1332	41	1.0534	0.54801	0.9223	1.6646
-6.5023	2.3466	-6.5023	2.6848	-4.1997	2.01	-3.1208	1.452	-0.28768	1.8875	-5.577	3.4967	-4.8929	1.7913	2.3026	0.83428	-0.69315	0.24451	-1.7721	1.9552	5.2893	1.9552	0.68412	0.99481	-7.1954	2.4628	2.8331	0.99482	-3.3815	2.7771	-0.92532	0.25546	-3.3815	3.1638	-0.92532	0.40559	3.5172	-5.8091	-2.4562	-8.6977	0.14769	0	3	2.3129	2635	42	2.0487	1.2504	0.63852	6.2961
-6.5023	2.8742	-6.5023	3.332	-4.1997	3.3385	-3.1208	1.5557	0.68471	1.2017	-7.3008	4.7108	-4.8929	3.1226	2.3026	0.1426	-0.69315	0.31655	-1.7721	4.2488	7.9855	4.2488	2.4079	0.50972	-7.1954	3.0393	3.8055	0.50972	-3.3815	3.9064	0.79851	0.74011	-3.3815	4.5612	0.79851	0.31625	6.2134	-5.8091	-4.18	-10.422	0.14769	0	6	2.8355	1257	43	1.0472	0.53902	0.94274	1.6449
-6.5023	1.8987	-6.5023	2.2712	-4.1997	1.5269	-3.1208	1.452	0.68471	1.431	-5.577	3.0567	-4.8929	1.3341	2.3026	0.87771	-0.69315	0.32163	-1.7721	2.0911	6.2617	2.0911	0.68412	1.0489	-7.1954	2.032	3.8055	1.0489	-3.3815	2.8791	-0.92532	0.29316	-3.3815	3.3917	-0.92532	0.39702	4.4896	-5.8091	-2.4562	-8.6977	0.14769	0	3	1.9394	2375	44	2.0307	1.2294	0.6517	6.1853
-6.5023	2.3563	-6.5023	2.8417	-4.1997	2.9762	-3.1208	1.4677	1.6571	1.1465	-7.3008	4.0782	-4.8929	2.6762	2.3026	0.15718	-0.69315	0.33101	-1.7721	4.2736	8.9579	4.2736	2.4079	0.49432	-7.1954	2.6004	4.7779	0.49432	-3.3815	3.9052	0.79851	0.74767	-3.3815	4.5706	0.79851	0.31298	7.1858	-5.8091	-4.18	-10.422	0.14769	0	6	2.4778	1194	45	1.0448	0.53556	0.95084	1.6374
-6.5023	1.4308	-6.5023	1.8211	-4.1997	1.1646	-3.1208	1.27	1.6571	1.0891	-5.577	2.5238	-4.8929	0.91911	2.3026	0.89041	-0.69315	0.33403	-1.7721	2.1156	7.2341	2.1156	0.68412	1.0454	-7.1954	1.5964	4.7779	1.0454	-3.3815	2.9063	-0.92532	0.32582	-3.3815	3.4788	-0.92532	0.38462	5.462	-5.8091	-2.4562	-8.6977	0.14769	0	3	1.5499	1790	46	2.0238	1.2213	0.65704	6.1435
-6.5023	3.5323	-6.5023	6.7023	-4.1997	1.6477	-3.1208	1.1408	1.6571	1.1464	-3.8531	1.1664	-4.8929	1.085	2.3026	4.7229	-0.69315	1.4182	-1.7721	0.091653	5.5102	0.091655	-1.0397	0.55701	-7.1954	4.0235	4.7779	0.557	-3.3815	4.2481	-2.6491	3.5513	-3.3815	7.098	-2.6491	6.4749	3.7381	-5.8091	-0.73237	-6.9739	0.14769	0	4	2.556	19759	47	3.3418	2.2975	0.45455	16.751
-6.5023	1.9433	-6.5023	2.4061	-4.1997	2.4931	-3.1208	1.5507	2.6295	0.97239	-7.3008	3.2483	-4.8929	2.1643	2.3026	0.15939	-0.69315	0.3329	-1.7721	4.2662	9.9303	4.2662	2.4079	0.42256	-7.1954	2.0776	5.7503	0.42256	-3.3815	3.8487	0.79851	0.67711	-3.3815	4.5351	0.79851	0.28204	8.1582	-5.8091	-4.18	-10.422	0.14769	0	6	2.1023	1006	48	1.0439	0.53424	0.95397	1.6346
-6.5023	1.1648	-6.5023	1.4992	-4.1997	0.80228	-3.1208	1.2522	2.6295	0.7431	-5.577	1.9761	-4.8929	0.70879	2.3026	0.90617	-0.69315	0.33284	-1.7721	2.0825	8.2065	2.0825	0.68412	1.0339	-7.1954	1.2467	5.7503	1.0339	-3.3815	2.9014	-0.92532	0.29984	-3.3815	3.4451	-0.92532	0.35516	6.4344	-5.8091	-2.4562	-8.6977	0.14769	1	5	1.2396	1196	49	2.0212	1.2182	0.65912	6.1276
-6.5023	3.0121	-6.5023	7.2651	-4.1997	1.5269	-3.1208	1.2446	2.6295	1.0339	-3.8531	1.1172	-4.8929	1.1081	2.3026	5.071	-0.69315	2.4882	-1.7721	0.081416	6.4826	0.081416	-1.0397	0.56143	-7.1954	3.5765	5.7503	0.56143	-3.3815	4.5095	-2.6491	3.8547	-3.3815	8.6801	-2.6491	8.0544	4.7105	-5.8091	-0.73237	-6.9739	0.14769	0	4	2.5333	17883	50	3.3329	2.2892	0.45593	16.662
-6.5023	1.432	-6.5023	1.9177	-4.1997	2.01	-3.1208	2.0758	3.6019	1.2569	-7.3008	2.6761	-4.8929	1.7826	2.3026	0.17688	-0.69315	0.33469	-1.7721	4.2689	10.903	4.2689	2.4079	0.39931	-7.1954	1.6829	6.7226	0.39931	-3.3815	3.8287	0.79851	0.6455	-3.3815	4.4969	0.79851	0.2554	9.1306	-5.8091	-4.18	-10.422	0.14769	0	6	1.8947	764	51	1.0436	0.53374	0.95516	1.6335
-6.5023	0.76808	-6.5023	1.1217	-4.1997	0.40547	-3.1208	1.6798	3.6019	0.40546	-5.577	1.4056	-4.8929	0.47898	2.3026	0.90784	-0.69315	0.33582	-1.7721	2.0979	9.1788	2.0979	0.68412	0.98681	-7.1954	0.85553	6.7226	0.98681	-3.3815	2.8886	-0.92532	0.25346	-3.3815	3.4766	-0.92532	0.35591	7.4068	-5.8091	-2.4562	-8.6977	0.14769	2	6	0.96435	709	52	2.0202	1.217	0.6599	6.1216
-6.5023	2.5461	-6.5023	7.6252	-4.1997	1.5269	-3.1208	1.88	3.6019	1.3142	-3.8531	1.315	-4.8929	1.7603	2.3026	5.2502	-0.69315	3.4623	-1.7721	0.075701	7.455	0.075703	-1.0397	0.56354	-7.1954	3.1909	6.7226	0.56354	-3.3815	4.6485	-2.6491	4.0112	-3.3815	9.7214	-2.6491	9.0956	5.6829	-5.8091	-0.73237	-6.9739	0.14769	0	4	2.7012	14175	53	3.3296	2.286	0.45647	16.629
-6.5023	1.5725	-6.5023	6.3316	-4.1997	1.5269	-3.1208	1.2446	3.6019	1.0849	-2.1293	1.223	-4.8929	1.3098	2.3026	4.7335	-0.69315	3.3377	-1.7721	0.20488	5.7312	0.20489	-2.7635	0.11323	-7.1954	2.1754	6.7226	0.11323	-3.3815	3.9331	-4.373	4.0033	-3.3815	8.2562	-4.373	8.4272	3.9591	-5.8091	0.99147	-5.2501	0.14769	0	4	2.1639	10721	54	4.5783	2.7986	0.63594	31.441
-6.5023	4.1622	-6.5023	4.4233	-4.1997	4.3047	-1.1974	1.2917	-0.28768	0.51171	-7.3008	6.087	-4.8929	4.151	2.3026	0.15081	-0.69315	0.23887	-3.6954	5.5787	7.0131	5.5787	2.4079	0.35488	-7.1954	4.258	0.90975	0.35487	-5.3049	5.3515	0.79851	0.2589	-5.3049	5.8423	0.79851	0.27752	3.3177	-5.8091	-6.1034	-8.4982	0.024295	1	7	3.4634	1386	55	1.113	0.62683	0.77563	1.8582
-6.5023	3.8259	-6.5023	4.1806	-4.1997	4.0632	-1.1974	1.3011	0.68471	0.68577	-7.3008	5.6743	-4.8929	3.8905	2.3026	0.13544	-0.69315	0.24829	-3.6954	6.0098	7.9855	6.0098	2.4079	0.38486	-7.1954	3.9951	1.8821	0.38486	-5.3049	5.6168	0.79851	0.48999	-5.3049	6.2641	0.79851	0.28802	4.2901	-5.8091	-6.1034	-8.4982	0.024295	1	7	3.2885	1300	56	1.0718	0.57459	0.86526	1.723
-6.5023	3.3789	-6.5023	3.7581	-4.1997	3.7009	-1.1974	1.7388	1.6571	0.97448	-7.3008	5.1481	-4.8929	3.4855	2.3026	0.12687	-0.69315	0.27701	-3.6954	6.0969	8.9579	6.0969	2.4079	0.43892	-7.1954	3.5189	2.8545	0.43892	-5.3049	5.7568	0.79851	0.59501	-5.3049	6.3759	0.79851	0.28981	5.2625	-5.8091	-6.1034	-8.4982	0.024295	0	6	3.1165	1310	57	1.0558	0.55253	0.91076	1.6719
-6.5023	4.8381	-6.5023	4.7494	-4.1997	1.7685	-1.1974	2.0271	1.6571	1.0891	-5.577	2.9272	-4.8929	1.2554	2.3026	1.6988	-0.69315	0.43259	-3.6954	3.1448	7.2341	3.1448	0.68412	1.5877	-7.1954	4.6738	2.8545	1.5877	-5.3049	5.3406	-0.92532	2.7267	-5.3049	6.2589	-0.92532	2.4601	3.5386	-5.8091	-4.3795	-6.7744	0.024295	0	1	2.8999	8586	58	2.0833	1.3251	0.57216	6.5103
-6.5023	2.8738	-6.5023	3.3292	-4.1997	3.3385	-1.1974	2.2296	2.6295	1.0339	-7.3008	4.7505	-4.8929	3.0917	2.3026	0.1297	-0.69315	0.32671	-3.6954	6.1523	9.9303	6.1523	2.4079	0.52254	-7.1954	3.0443	3.8269	0.52255	-5.3049	5.8776	0.79851	0.79874	-5.3049	6.522	0.79851	0.32086	6.2349	-5.8091	-6.1034	-8.4982	0.024295	0	5	2.9259	1323	59	1.0496	0.54381	0.93014	1.6526
-6.5023	4.6753	-6.5023	5.1734	-4.1997	1.2854	-1.1974	2.6493	2.6295	1.087	-5.577	2.3545	-4.8929	1.0932	2.3026	3.1526	-0.69315	0.52078	-3.6954	3.143	8.2065	3.143	0.68412	1.5925	-7.1954	4.7733	3.8269	1.5925	-5.3049	7.2535	-0.92532	3.4451	-5.3049	6.3967	-0.92532	3.0288	4.511	-5.8091	-4.3795	-6.7744	0.024295	0	1	2.8708	7727	60	2.0659	1.3064	0.58142	6.402
-6.5023	2.4692	-6.5023	2.927	-4.1997	2.9489	-1.1974	2.7464	3.6019	1.4899	-7.3008	4.1107	-4.8929	2.7225	2.3026	0.1749	-0.69315	0.29986	-3.6954	6.2115	10.903	6.2115	2.4079	0.49854	-7.1954	2.6613	4.7993	0.49854	-5.3049	5.8249	0.79851	0.74141	-5.3049	6.4932	0.79851	0.30313	7.2072	-5.8091	-6.1034	-8.4982	0.024295	0	6	2.782	9224	61	1.0473	0.54045	0.93782	1.6453
-6.5023	4.8253	-6.5023	7.1869	-4.1997	1.0321	-1.1974	3.1689	3.6019	1.4899	-5.577	1.7748	-4.8929	1.0346	2.3026	6.1813	-0.69315	0.60919	-3.6954	3.1359	9.1788	3.1359	0.68412	1.5991	-7.1954	5.3038	4.7993	1.5991	-5.3049	8.8917	-0.92532	4.1798	-5.3049	10.251	-0.92532	5.5049	5.4834	-5.8091	-4.3795	-6.7744	0.024295	0	1	3.2463	50116	62	2.0593	1.2991	0.58518	6.3609
-6.5023	1.6209	-6.5023	6.3008	-4.1997	4.6671	-1.1974	1.9234	3.6019	2.0021	-3.8531	1.2217	-4.8929	1.1686	2.3026	1.8625	-0.69315	3.0537	-3.6954	2.3659	7.455	2.3659	-1.0397	0.17715	-7.1954	2.2801	4.7993	0.17715	-5.3049	3.753	-2.6491	1.4394	-5.3049	7.5823	-2.6491	5.1287	3.7596	-5.8091	-2.6557	-5.0506	0.024295	0	2	2.956	19595	63	3.7638	3.0701	0.22596	21.249
-6.5023	4.0142	-6.5023	4.272	-4.1997	4.184	0.72595	1.7725	1.6571	1.3757	-7.3008	6.0352	-4.8929	4.018	2.3026	0.14795	-0.69315	0.23797	-5.6188	7.4154	8.9579	7.4154	2.4079	0.33019	-7.1954	4.0892	0.93113	0.33019	-7.2282	7.2092	0.79851	0.23902	-7.2282	7.6967	0.79851	0.27997	3.3391	-5.8091	-8.0268	-6.5748	0.0036172	0	6	3.6089	1406	64	1.112	0.62574	0.77703	1.8547
-6.5023	3.6675	-6.5023	4.0451	-4.1997	3.9424	0.72595	2.6022	2.6295	1.8322	-7.3008	5.582	-4.8929	3.7329	2.3026	0.13006	-0.69315	0.24734	-5.6188	7.9106	9.9303	7.9106	2.4079	0.37135	-7.1954	3.8632	1.9035	0.37135	-7.2282	7.5385	0.79851	0.45824	-7.2282	8.1519	0.79851	0.2906	4.3115	-5.8091	-8.0268	-6.5748	0.0036172	0	6	3.6119	1289	65	1.0716	0.57449	0.86524	1.7223
-6.5023	3.3397	-6.5023	3.7302	-4.1997	3.7009	0.72595	3.3281	3.6019	2.2314	-7.3008	5.2029	-4.8929	3.4565	2.3026	0.12278	-0.69315	0.26483	-5.6188	7.9593	10.903	7.9593	2.4079	0.38439	-7.1954	3.5188	2.8759	0.38439	-7.2282	7.601	0.79851	0.53063	-7.2282	8.2484	0.79851	0.28727	5.2839	-5.8091	-8.0268	-6.5748	0.0036172	0	6	3.5889	1333	66	1.0559	0.55288	0.90977	1.6723
-6.5023	5.8799	-6.5023	6.7574	-4.1997	1.7685	0.72595	4.0542	3.6019	2.346	-5.577	2.7346	-4.8929	1.093	2.3026	5.306	-0.69315	0.50669	-5.6188	5.0468	9.1788	5.0469	0.68412	1.5829	-7.1954	6.0406	2.8759	1.5829	-7.2282	10.133	-0.92532	3.5805	-7.2282	10.556	-0.92532	4.0696	3.56	-5.8091	-6.3029	-4.851	0.0036172	0	1	3.9234	12757	67	2.0879	1.3364	0.56236	6.539
-6.5023	2.9202	-6.5023	2.929	-1.9265	5.1813	-6.9675	2.8177	-0.28768	1.3852	-7.3008	3.3107	-2.6197	5.1457	4.5757	2.2101	-0.69315	0.036034	4.3478	2.4285	7.0131	2.4285	4.6811	2.1001	-7.1954	2.9502	6.6798	2.1001	0.46522	0.41104	0.79851	0.30901	0.46522	0.44138	0.79851	0.26344	11.361	-5.8091	-0.33329	-14.268	2.9691	0	5	3.0907	565	68	0.72314	0.04685	14.435	0.78441
-6.5023	3.1766	-6.5023	3.2524	-1.9265	5.4171	-6.9675	3.9817	-0.28768	1.4038	-5.577	2.5758	-2.6197	5.3805	4.5757	1.9419	-0.69315	0.036661	4.3478	1.7642	5.2893	1.7642	2.9573	2.776	-7.1954	3.2132	6.6798	2.776	0.46522	0.40988	-0.92532	1.0029	0.46522	0.33872	-0.92532	1.0735	9.6371	-5.8091	1.3905	-12.544	2.9691	0	3	3.3013	1124	69	0.95566	0.06332	14.092	1.3699
-6.5023	3.6858	-6.5023	3.757	-1.9265	4.9455	-6.9675	4.6567	-0.28768	1.236	-3.8531	1.9317	-2.6197	4.908	4.5757	1.384	-0.69315	0.036081	4.3478	1.137	3.5655	1.137	1.2334	3.2804	-7.1954	3.7236	6.6798	3.2804	0.46522	0.61092	-2.6491	2.7046	0.46522	0.53122	-2.6491	2.7683	7.9133	-5.8091	3.1144	-10.821	2.9691	0	3	3.3688	1256	70	1.0009	0.073835	12.556	1.5027
-6.5023	3.372	-6.5023	3.3682	-1.9265	3.2163	-6.9675	5.7366	-0.28768	1.0121	-2.1293	1.4209	-2.6197	3.2405	4.5757	0.34069	-0.69315	0.022916	4.3478	1.1505	1.8416	1.1505	-0.49039	4.6734	-7.1954	3.3737	6.6798	4.6734	0.46522	1.0885	-4.373	4.613	0.46522	1.059	-4.373	4.642	6.1894	-5.8091	4.8382	-9.0968	2.9691	0	2	3.021	885	71	1.0076	0.085377	10.801	1.5228
-6.5023	2.8921	-6.5023	2.8433	-1.9265	2.7447	-6.9675	6.614	-0.28768	0.40547	-0.40546	2.0073	-2.6197	2.7694	4.5757	0.17697	-0.69315	0.020577	4.3478	2.6697	0.11778	2.6697	-2.2142	6.3168	-7.1954	2.8673	6.6798	6.3168	0.46522	2.505	-6.0968	6.5157	0.46522	2.5466	-6.0968	6.46	4.4656	-5.8091	6.562	-7.373	2.9691	1	3	2.9178	710	72	1.0264	0.135	6.6031	1.5803
-6.5023	3.0037	-6.5023	3.0781	-1.9265	5.5743	-6.9675	3.5767	0.68471	1.0048	-5.577	2.2141	-2.6197	5.5363	4.5757	2.1745	-0.69315	0.037962	4.3478	1.9139	6.2617	1.9139	2.9573	3.0937	-7.1954	3.0418	7.6522	3.0937	0.46522	0.40358	-0.92532	0.9444	0.46522	0.32799	-0.92532	1.0172	10.609	-5.8091	1.3905	-12.544	2.9691	0	3	3.0753	1254	73	0.95558	0.063082	14.148	1.3697
-6.5023	3.1735	-6.5023	3.2473	-1.9265	4.8669	-6.9675	4.1842	0.68471	0.89777	-3.8531	1.6128	-2.6197	4.8292	4.5757	1.5116	-0.69315	0.037494	4.3478	1.2353	4.5379	1.2353	1.2334	3.7981	-7.1954	3.2121	7.6522	3.7981	0.46522	0.51587	-2.6491	2.5827	0.46522	0.43379	-2.6491	2.6565	8.8857	-5.8091	3.1144	-10.821	2.9691	0	3	2.9971	1507	74	1.0005	0.072571	12.786	1.5014
-6.5023	3.7448	-6.5023	3.7614	-1.9265	4.3953	-6.9675	5.1291	0.68471	0.89777	-2.1293	1.0814	-2.6197	4.4161	4.5757	0.47242	-0.69315	0.025395	4.3478	1.0475	2.814	1.0475	-0.49039	4.7373	-7.1954	3.7244	7.6522	4.7373	0.46522	0.83806	-4.373	4.4976	0.46522	0.7624	-4.373	4.5628	7.1618	-5.8091	4.8382	-9.0968	2.9691	0	2	3.1683	1099	75	1.005	0.078406	11.818	1.5152
-6.5023	2.7187	-6.5023	2.6742	-1.9265	2.5875	-6.9675	6.0066	0.68471	0.74367	-0.40546	1.6181	-2.6197	2.6085	4.5757	0.22494	-0.69315	0.021413	4.3478	1.9594	1.0902	1.9594	-2.2142	6.3363	-7.1954	2.6958	7.6522	6.3363	0.46522	1.7753	-6.0968	6.4729	0.46522	1.7885	-6.0968	6.4324	5.438	-5.8091	6.562	-7.373	2.9691	1	3	2.7248	744	76	1.0124	0.098161	9.3134	1.5374
-6.5023	2.9204	-6.5023	2.9999	-1.9265	4.8669	-6.9675	3.7729	1.6571	0.96995	-3.8531	1.2209	-2.6197	4.8253	4.5757	1.61	-0.69315	0.03843	4.3478	1.2919	5.5102	1.2919	1.2334	4.0138	-7.1954	2.9582	8.6246	4.0138	0.46522	0.5015	-2.6491	2.5538	0.46522	0.42484	-2.6491	2.6295	9.858	-5.8091	3.1144	-10.821	2.9691	0	3	2.7918	1539	77	1.0003	0.072092	12.875	1.5009
-6.5023	3.347	-6.5023	3.4257	-1.9265	4.7097	-6.9675	4.5217	1.6571	1.1192	-2.1293	1.0264	-2.6197	4.6702	4.5757	1.2209	-0.69315	0.036047	4.3478	1.0027	3.7864	1.0027	-0.49039	4.9828	-7.1954	3.3843	8.6246	4.9828	0.46522	0.67168	-4.373	4.4014	0.46522	0.59412	-4.373	4.4747	8.1342	-5.8091	4.8382	-9.0968	2.9691	0	3	3.0249	1246	78	1.0041	0.075749	12.255	1.5123
-6.5023	3.5708	-6.5023	3.5292	-1.9265	3.3735	-6.9675	5.5341	1.6571	1.1938	-0.40546	1.4011	-2.6197	3.3969	4.5757	0.36767	-0.69315	0.023447	4.3478	1.1339	2.0625	1.1339	-2.2142	6.3954	-7.1954	3.55	8.6246	6.3954	0.46522	0.98841	-6.0968	6.2969	0.46522	0.92395	-6.0968	6.3493	6.4104	-5.8091	6.562	-7.373	2.9691	0	2	3.1004	932	79	1.007	0.083604	11.045	1.5211
-6.5023	2.4918	-6.5023	2.565	-1.9265	4.6311	-6.9675	3.1718	2.6295	1.0843	-3.8531	1.0271	-2.6197	4.5861	4.5757	1.7264	-0.69315	0.039509	4.3478	1.3648	6.4826	1.3648	1.2334	4.1999	-7.1954	2.5296	9.597	4.1999	0.46522	0.50161	-2.6491	2.5376	0.46522	0.42304	-2.6491	2.617	10.83	-5.8091	3.1144	-10.821	2.9691	0	3	2.4952	1620	80	1.0002	0.071912	12.909	1.5007
-6.5023	3.1438	-6.5023	3.1692	-1.9265	4.7097	-6.9675	4.0189	2.6295	1.2659	-2.1293	1.102	-2.6197	4.6702	4.5757	1.3605	-0.69315	0.037539	4.3478	1.0456	4.7588	1.0456	-0.49039	5.4176	-7.1954	3.1284	9.597	5.4176	0.46522	0.5595	-4.373	4.2989	0.46522	0.48247	-4.373	4.3764	9.1066	-5.8091	4.8382	-9.0968	2.9691	0	3	2.9016	1422	81	1.0037	0.07474	12.429	1.5112
-6.5023	3.7416	-6.5023	3.7624	-1.9265	4.6311	-6.9675	5.0616	2.6295	1.5693	-0.40546	1.7003	-2.6197	4.596	4.5757	0.59142	-0.69315	0.027686	4.3478	1.0092	3.0349	1.0092	-2.2142	6.4778	-7.1954	3.7245	9.597	6.4778	0.46522	0.75532	-6.0968	6.1723	0.46522	0.68302	-6.0968	6.2438	7.3828	-5.8091	6.562	-7.373	2.9691	0	3	3.4111	1179	82	1.005	0.078004	11.884	1.515
-6.5023	0.29216	-6.5023	0.30049	-1.9265	0.28262	-3.1208	0.61724	3.6019	0.29174	-2.1293	0.50672	-2.6197	0.32968	4.5757	0.34802	-0.69315	0.048882	0.50108	0.27402	5.7312	0.27401	-0.49039	0.69734	-7.1954	0.27328	6.7226	0.69734	-3.3815	0.51337	-4.373	0.92026	-3.3815	0.53993	-4.373	1.0096	6.2323	-5.8091	0.99147	-5.2501	0.9343	6	16	0.38183	2050	83	2.3443	0.91115	1.5729	8.2439
-6.5023	3.3443	-6.5023	3.4203	-1.9265	4.7097	-6.9675	4.3867	3.6019	2.2059	-0.40546	2.1811	-2.6197	4.668	4.5757	1.2283	-0.69315	0.036235	4.3478	0.96683	4.0073	0.96684	-2.2142	6.7845	-7.1954	3.3832	10.569	6.7845	0.46522	0.64981	-6.0968	6.1049	0.46522	0.57494	-6.0968	6.1789	8.3551	-5.8091	6.562	-7.373	2.9691	0	3	3.3747	1265	84	1.0042	0.075872	12.236	1.5127
-6.5023	2.3411	-6.5023	2.42	-1.9265	4.3167	-5.0441	2.5037	-0.28768	1.8702	-7.3008	3.688	-2.6197	4.2733	4.5757	1.3899	-0.69315	0.039985	2.4244	2.3869	7.0131	2.3869	4.6811	1.5665	-7.1954	2.3844	4.7565	1.5665	-1.4581	2.1637	0.79851	0.093255	-1.4581	2.2211	0.79851	0.13542	9.4376	-5.8091	-2.2567	-12.345	2.1643	0	3	2.8566	3145	85	0.86398	0.069977	11.347	1.1197
-6.5023	0.91619	-6.5023	0.87856	-1.9265	0.85834	-5.0441	2.5308	-0.28768	2.8774	-5.577	1.2319	-2.6197	0.87534	4.5757	0.084816	-0.69315	0.01985	2.4244	1.1848	5.2893	1.1848	2.9573	0.25043	-7.1954	0.89694	4.7565	0.25043	-1.4581	1.1663	-0.92532	0.21898	-1.4581	1.1998	-0.92532	0.17928	7.7137	-5.8091	-0.53283	-10.621	2.1643	0	6	1.5489	472	86	1.4498	0.14048	9.3198	3.1528
-6.5023	1.0856	-6.5023	1.0484	-1.9265	1.0941	-5.0441	3.3408	-0.28768	2.7655	-3.8531	1.1033	-2.6197	1.115	4.5757	0.11123	-0.69315	0.019839	2.4244	1.5734	3.5655	1.5734	1.2334	1.2804	-7.1954	1.0674	4.7565	1.2804	-1.4581	1.5937	-2.6491	1.1874	-1.4581	1.6358	-2.6491	1.1462	5.9899	-5.8091	1.191	-8.8973	2.1643	0	2	1.7396	843	87	1.7125	0.23218	6.3755	4.3988
-6.5023	1.778	-6.5023	1.7891	-1.9265	1.7729	-5.0441	3.083	-0.28768	1.2563	-2.1293	1.0667	-2.6197	1.768	4.5757	0.088005	-0.69315	0.006289	2.4244	0.5277	1.8416	0.5277	-0.49039	2.2981	-7.1954	1.7838	4.7565	2.2981	-1.4581	0.39525	-4.373	2.4243	-1.4581	0.38703	-4.373	2.435	4.2661	-5.8091	2.9148	-7.1734	2.1643	0	6	1.791	11343	88	1.7659	0.30703	4.7515	4.6775
-6.5023	1.9824	-6.5023	2.0539	-1.9265	4.0809	-5.0441	1.9938	0.68471	1.3032	-7.3008	3.1617	-2.6197	4.0406	4.5757	1.4448	-0.69315	0.040697	2.4244	2.6548	7.9855	2.6548	4.6811	1.5405	-7.1954	2.0179	5.7289	1.5405	-1.4581	2.1225	0.79851	0.19174	-1.4581	2.1768	0.79851	0.1411	10.41	-5.8091	-2.2567	-12.345	2.1643	0	3	2.4293	3273	89	0.86387	0.06966	11.401	1.1194
-6.5023	0.65801	-6.5023	0.62036	-1.9265	0.54394	-5.0441	2.1275	0.68471	2.2408	-5.577	0.75852	-2.6197	0.56581	4.5757	0.091782	-0.69315	0.019783	2.4244	1.0573	6.2617	1.0573	2.9573	0.24661	-7.1954	0.6396	5.7289	0.24661	-1.4581	0.96624	-0.92532	0.21561	-1.4581	1.0121	-0.92532	0.17703	8.6861	-5.8091	-0.53283	-10.621	2.1643	3	11	1.1582	272	90	1.4494	0.13945	9.3939	3.1511
-6.5023	0.95934	-6.5023	0.94435	-1.9265	1.0352	-5.0441	2.3349	0.68471	1.958	-3.8531	1.115	-2.6197	1.0448	4.5757	0.087139	-0.69315	0.010512	2.4244	0.78377	4.5379	0.78377	1.2334	1.1801	-7.1954	0.95342	5.7289	1.1801	-1.4581	0.76198	-2.6491	1.1395	-1.4581	0.78413	-2.6491	1.1211	6.9623	-5.8091	1.191	-8.8973	2.1643	0	2	1.3911	1142	91	1.7106	0.22746	6.5205	4.3894
-6.5023	1.2657	-6.5023	1.249	-1.9265	1.2349	-5.0441	3.4322	0.68471	1.2641	-2.1293	1.3222	-2.6197	1.2445	4.5757	0.10234	-0.69315	0.010407	2.4244	1.5404	2.814	1.5404	-0.49039	2.7629	-7.1954	1.2578	5.7289	2.7629	-1.4581	1.5128	-4.373	2.7898	-1.4581	1.5385	-4.373	2.7667	5.2385	-5.8091	2.9148	-7.1734	2.1643	0	2	1.628	1735	92	1.756	0.2824	5.2181	4.6251
-6.5023	2.0597	-6.5023	2.0644	-1.9265	2.023	-5.0441	3.6844	0.68471	0.61818	-0.40546	1.1257	-2.6197	2.026	4.5757	0.10619	-0.69315	0.0064508	2.4244	0.76256	1.0902	0.76256	-2.2142	4.1589	-7.1954	2.0578	5.7289	4.1589	-1.4581	0.61974	-6.0968	4.3091	-1.4581	0.61187	-6.0968	4.3143	3.5146	-5.8091	4.6387	-5.4496	2.1643	1	5	1.9292	12311	93	1.7887	0.35908	3.9814	4.7991
-6.5023	1.6546	-6.5023	1.7464	-1.9265	3.8451	-5.0441	1.6534	1.6571	1.1565	-7.3008	2.5622	-2.6197	3.8022	4.5757	1.5653	-0.69315	0.041944	2.4244	2.9625	8.9579	2.9625	4.6811	1.5603	-7.1954	1.6995	6.7012	1.5603	-1.4581	2.0668	0.79851	0.20943	-1.4581	2.1157	0.79851	0.14126	11.382	-5.8091	-2.2567	-12.345	2.1643	0	3	2.103	2814	94	0.86382	0.069541	11.422	1.1193
-6.5023	0.3853	-6.5023	0.40547	-1.9265	0.38674	-5.0441	1.4456	1.6571	1.6041	-5.577	0.52309	-2.6197	0.39978	4.5757	0.084816	-0.69315	0.018501	2.4244	0.88968	7.2341	0.88968	2.9573	0.20385	-7.1954	0.389	6.7012	0.20385	-1.4581	0.83402	-0.92532	0.19893	-1.4581	0.86667	-0.92532	0.16736	9.6585	-5.8091	-0.53283	-10.621	2.1643	4	12	0.79172	169	95	1.4492	0.13905	9.4222	3.1505
-6.5023	0.48458	-6.5023	0.44946	-1.9265	0.46534	-5.0441	2.3283	1.6571	1.3057	-3.8531	0.87574	-2.6197	0.48655	4.5757	0.08781	-0.69315	0.019745	2.4244	1.5048	5.5102	1.5048	1.2334	1.2072	-7.1954	0.46742	6.7012	1.2072	-1.4581	1.5563	-2.6491	1.1597	-1.4581	1.5865	-2.6491	1.1202	7.9347	-5.8091	1.191	-8.8973	2.1643	3	7	0.98486	317	96	1.7099	0.22567	6.5772	4.3859
-6.5023	1.0931	-6.5023	1.0498	-1.9265	1.0941	-5.0441	3.1383	1.6571	1.1938	-2.1293	1.7012	-2.6197	1.1079	4.5757	0.078071	-0.69315	0.019648	2.4244	1.6533	3.7864	1.6533	-0.49039	2.7012	-7.1954	1.0705	6.7012	2.7012	-1.4581	1.5717	-4.373	2.7819	-1.4581	1.6122	-4.373	2.7371	6.2108	-5.8091	2.9148	-7.1734	2.1643	0	2	1.545	713	97	1.7522	0.27291	5.4205	4.6053
-6.5023	1.5129	-6.5023	1.4756	-1.9265	1.4085	-5.0441	3.9482	1.6571	0.7834	-0.40546	2.3116	-2.6197	1.4276	4.5757	0.070988	-0.69315	0.020262	2.4244	1.9448	2.0625	1.9448	-2.2142	4.4528	-7.1954	1.495	6.7012	4.4528	-1.4581	1.8806	-6.0968	4.5109	-1.4581	1.9293	-6.0968	4.4675	4.487	-5.8091	4.6387	-5.4496	2.1643	0	2	1.9067	1045	98	1.7679	0.30891	4.7229	4.6881
-6.5023	0.29193	-6.5023	0.27944	-1.9265	0.22955	-5.0441	0.90546	2.6295	0.93018	-5.577	0.45416	-2.6197	0.23281	4.5757	0.099034	-0.69315	0.016355	2.4244	0.61447	8.2065	0.61447	2.9573	0.14232	-7.1954	0.29345	7.6736	0.14232	-1.4581	0.70375	-0.92532	0.16419	-1.4581	0.69366	-0.92532	0.1324	10.631	-5.8091	-0.53283	-10.621	2.1643	4	16	0.51512	67	99	1.4492	0.1389	9.433	3.1502
-6.5023	0.32887	-6.5023	0.31999	-1.9265	0.30815	-5.0441	1.706	2.6295	0.70635	-3.8531	0.89234	-2.6197	0.323	4.5757	0.087114	-0.69315	0.019152	2.4244	1.26	6.4826	1.26	1.2334	1.1187	-7.1954	0.30725	7.6736	1.1187	-1.4581	1.2456	-2.6491	1.1294	-1.4581	1.281	-2.6491	1.0916	8.9071	-5.8091	1.191	-8.8973	2.1643	4	8	0.71028	177	100	1.7097	0.22499	6.5989	4.3846
-6.5023	0.58325	-6.5023	0.53618	-1.9265	0.54394	-5.0441	2.5983	2.6295	0.70635	-2.1293	1.9183	-2.6197	0.56459	4.5757	0.079375	-0.69315	0.019934	2.4244	1.6526	4.7588	1.6526	-0.49039	2.7056	-7.1954	0.55878	7.6736	2.7056	-1.4581	1.5775	-4.373	2.7846	-1.4581	1.6173	-4.373	2.7394	7.1832	-5.8091	2.9148	-7.1734	2.1643	4	8	1.1477	391	101	1.7508	0.2693	5.5013	4.5978
-6.5023	1.0878	-6.5023	1.0491	-1.9265	1.0155	-5.0441	3.4082	2.6295	0.81827	-0.40546	2.7003	-2.6197	1.0359	4.5757	0.079404	-0.69315	0.019866	2.4244	1.6672	3.0349	1.6672	-2.2142	4.3895	-7.1954	1.0683	7.6736	4.3895	-1.4581	1.5513	-6.0968	4.4937	-1.4581	1.5921	-6.0968	4.4528	5.4594	-5.8091	4.6387	-5.4496	2.1643	0	2	1.6799	893	102	1.7599	0.28922	5.0852	4.6461
-6.5023	0.28122	-6.5023	0.31985	-1.9265	0.30815	-5.0441	0.91046	3.6019	0.26114	-3.8531	1.0867	-2.6197	0.3003	4.5757	0.079295	-0.69315	0.01819	2.4244	0.956	7.455	0.956	1.2334	0.98134	-7.1954	0.29863	8.646	0.98134	-1.4581	0.9053	-2.6491	1.0547	-1.4581	0.94133	-2.6491	1.0162	9.8795	-5.8091	1.191	-8.8973	2.1643	4	8	0.52792	58	103	1.7096	0.22473	6.6072	4.384
-6.5023	0.37013	-6.5023	0.40547	-1.9265	0.39925	-5.0441	2.0429	3.6019	0.40546	-2.1293	2.2637	-2.6197	0.38312	4.5757	0.079327	-0.69315	0.019285	2.4244	1.5286	5.7312	1.5286	-0.49039	2.6736	-7.1954	0.3841	8.646	2.6736	-1.4581	1.4462	-4.373	2.7657	-1.4581	1.4884	-4.373	2.7272	8.1556	-5.8091	2.9148	-7.1734	2.1643	4	8	0.98115	240	104	1.7502	0.26793	5.5326	4.595
-6.5023	0.83167	-6.5023	0.79236	-1.9265	0.70114	-5.0441	2.7333	3.6019	0.90023	-0.40546	3.1398	-2.6197	0.7246	4.5757	0.081968	-0.69315	0.019952	2.4244	1.493	4.0073	1.493	-2.2142	4.3387	-7.1954	0.81182	8.646	4.3387	-1.4581	1.3722	-6.0968	4.4749	-1.4581	1.42	-6.0968	4.4333	6.4318	-5.8091	4.6387	-5.4496	2.1643	1	4	1.5164	659	105	1.7569	0.28167	5.2376	4.6302
-6.5023	2.6843	-6.5023	2.7458	-1.9265	3.9237	-3.1208	2.3623	-0.28768	1.1241	-7.3008	4.3983	-2.6197	3.888	4.5757	1.0242	-0.69315	0.038732	0.50108	3.3425	7.0131	3.3425	4.6811	1.3146	-7.1954	2.703	2.8331	1.3146	-3.3815	2.7404	0.79851	0.056828	-3.3815	2.7605	0.79851	0.098612	7.5142	-5.8091	-4.18	-10.422	0.9343	0	3	2.8731	2353	106	0.87903	0.078732	10.165	1.159
-6.5023	1.9492	-6.5023	1.9781	-1.9265	2.1159	-3.1208	1.4849	-0.28768	2.0194	-5.577	3.5636	-2.6197	2.0782	4.5757	0.11466	-0.69315	0.026838	0.50108	2.343	5.2893	2.343	2.9573	0.41569	-7.1954	1.9358	2.8331	0.41568	-3.3815	2.2643	-0.92532	0.52793	-3.3815	2.3357	-0.92532	0.45487	5.7904	-5.8091	-2.4562	-8.6977	0.9343	0	6	2.1852	555	107	1.5568	0.20682	6.5273	3.6353
-6.5023	0.91788	-6.5023	0.87694	-1.9265	0.93694	-3.1208	0.94492	-0.28768	1.9821	-3.8531	2.4461	-2.6197	0.95802	4.5757	0.085425	-0.69315	0.021784	0.50108	0.75519	3.5655	0.75519	1.2334	0.90583	-7.1954	0.89815	2.8331	0.90584	-3.3815	0.72358	-2.6491	0.88754	-3.3815	0.68475	-2.6491	0.93032	4.0665	-5.8091	-0.73237	-6.9739	0.9343	0	4	1.3508	2465	108	2.0706	0.56683	2.6529	6.4311
-6.5023	2.4278	-6.5023	2.5139	-1.9265	3.8451	-3.1208	2.0923	0.68471	1.0097	-7.3008	4.0667	-2.6197	3.807	4.5757	1.0601	-0.69315	0.039405	0.50108	3.6339	7.9855	3.6339	4.6811	1.3649	-7.1954	2.4706	3.8055	1.3649	-3.3815	2.9047	0.79851	0.10336	-3.3815	2.9558	0.79851	0.1048	8.4866	-5.8091	-4.18	-10.422	0.9343	0	3	2.6592	2875	109	0.87825	0.076623	10.462	1.157
-6.5023	1.7265	-6.5023	1.8002	-1.9265	1.8801	-3.1208	1.2149	0.68471	1.4947	-5.577	3.2378	-2.6197	1.8402	4.5757	0.11838	-0.69315	0.035453	0.50108	2.3663	6.2617	2.3663	2.9573	0.52953	-7.1954	1.7628	3.8055	0.52953	-3.3815	2.2605	-0.92532	0.64314	-3.3815	2.3354	-0.92532	0.56288	6.7628	-5.8091	-2.4562	-8.6977	0.9343	0	6	1.8924	545	110	1.5543	0.20045	6.754	3.6239
-6.5023	0.79416	-6.5023	0.79126	-1.9265	0.85834	-3.1208	0.87743	0.68471	1.8677	-3.8531	2.4002	-2.6197	0.87775	4.5757	0.083614	-0.69315	0.021856	0.50108	0.76794	4.5379	0.76794	1.2334	1.0399	-7.1954	0.80568	3.8055	1.0399	-3.3815	0.72764	-2.6491	1.0148	-3.3815	0.685	-2.6491	1.0578	5.0389	-5.8091	-0.73237	-6.9739	0.9343	0	4	1.2648	2069	111	2.0603	0.54432	2.7851	6.3671
-6.5023	0.77048	-6.5023	0.78651	-1.9265	1.0654	-3.1208	1.5557	0.68471	1.3163	-2.1293	1.1516	-2.6197	1.0125	4.5757	0.38069	-0.69315	0.051564	0.50108	0.31757	2.814	0.31757	-0.49039	0.93004	-7.1954	0.81299	3.8055	0.93004	-3.3815	0.71659	-4.373	1.1875	-3.3815	0.75162	-4.373	1.2859	3.3151	-5.8091	0.99147	-5.2501	0.9343	0	5	1.1077	1338	112	2.3735	0.96342	1.4636	8.4501
-6.5023	2.0658	-6.5023	2.1395	-1.9265	3.7665	-3.1208	1.9573	1.6571	1.0818	-7.3008	3.5697	-2.6197	3.7199	4.5757	1.102	-0.69315	0.040248	0.50108	3.8828	8.9579	3.8828	4.6811	1.4145	-7.1954	2.1033	4.7779	1.4145	-3.3815	2.9897	0.79851	0.14413	-3.3815	3.0433	0.79851	0.11386	9.459	-5.8091	-4.18	-10.422	0.9343	0	3	2.4301	2943	113	0.87797	0.075823	10.579	1.1562
-6.5023	1.3005	-6.5023	1.3624	-1.9265	1.4085	-3.1208	1.2149	1.6571	1.0819	-5.577	2.62	-2.6197	1.4044	4.5757	0.13224	-0.69315	0.036884	0.50108	2.3421	7.2341	2.3421	2.9573	0.43582	-7.1954	1.332	4.7779	0.43582	-3.3815	2.2015	-0.92532	0.58731	-3.3815	2.2748	-0.92532	0.51285	7.7351	-5.8091	-2.4562	-8.6977	0.9343	0	6	1.498	390	114	1.5534	0.19804	6.8441	3.6196
-6.5023	0.50063	-6.5023	0.52345	-1.9265	0.54394	-3.1208	0.67494	1.6571	1.4176	-3.8531	1.9787	-2.6197	0.56832	4.5757	0.075971	-0.69315	0.022125	0.50108	0.742	5.5102	0.742	1.2334	1.0713	-7.1954	0.48459	4.7779	1.0713	-3.3815	0.71196	-2.6491	1.0667	-3.3815	0.6661	-2.6491	1.1122	6.0113	-5.8091	-0.73237	-6.9739	0.9343	4	12	0.93987	1334	115	2.0564	0.53567	2.8389	6.3429
-6.5023	0.63874	-6.5023	0.64206	-1.9265	0.94461	-3.1208	1.452	1.6571	1.2611	-2.1293	1.1157	-2.6197	0.92554	4.5757	0.37997	-0.69315	0.051668	0.50108	0.28696	3.7864	0.28695	-0.49039	0.88325	-7.1954	0.6751	4.7779	0.88325	-3.3815	0.68729	-4.373	1.1997	-3.3815	0.72284	-4.373	1.301	4.2875	-5.8091	0.99147	-5.2501	0.9343	2	9	1.009	1092	116	2.3544	0.92939	1.5332	8.3145
-6.5023	2.4701	-6.5023	2.571	-1.9265	5.534	-3.1208	1.452	2.6295	1.7176	-7.3008	4.3522	-2.6197	5.4831	4.5757	2.8529	-0.69315	0.051873	0.50108	6.2082	9.9303	6.2082	4.6811	1.6316	-7.1954	2.5195	5.7503	1.6316	-3.3815	3.9017	0.79851	0.95126	-3.3815	4.0013	0.79851	0.85199	10.431	-5.8091	-4.18	-10.422	0.9343	0	1	3.0162	472	117	0.87785	0.07552	10.624	1.1559
-6.5023	0.95877	-6.5023	1.031	-1.9265	1.0941	-3.1208	0.98381	2.6295	0.82317	-5.577	2.0339	-2.6197	1.0555	4.5757	0.13458	-0.69315	0.037189	0.50108	2.369	8.2065	2.369	2.9573	0.45062	-7.1954	0.99453	5.7503	0.45061	-3.3815	2.2266	-0.92532	0.63384	-3.3815	2.3035	-0.92532	0.5571	8.7075	-5.8091	-2.4562	-8.6977	0.9343	0	6	1.1541	271	118	1.5531	0.19712	6.8788	3.618
-6.5023	0.3211	-6.5023	0.31995	-1.9265	0.32065	-3.1208	0.53997	2.6295	0.74366	-3.8531	1.2314	-2.6197	0.3031	4.5757	0.069974	-0.69315	0.021542	0.50108	0.64216	6.4826	0.64216	1.2334	0.83597	-7.1954	0.30116	5.7503	0.83596	-3.3815	0.65361	-2.6491	0.80701	-3.3815	0.61363	-2.6491	0.85411	6.9837	-5.8091	-0.73237	-6.9739	0.9343	5	13	0.57945	653	119	2.0549	0.53238	2.8598	6.3337
-6.5023	0.40547	-6.5023	0.40547	-1.9265	0.70306	-3.1208	1.1408	2.6295	0.7473	-2.1293	0.80893	-2.6197	0.65231	4.5757	0.43232	-0.69315	0.053458	0.50108	0.31493	4.7588	0.31493	-0.49039	0.8917	-7.1954	0.36981	5.7503	0.8917	-3.3815	0.70252	-4.373	1.2013	-3.3815	0.74202	-4.373	1.3041	5.2599	-5.8091	0.99147	-5.2501	0.9343	4	12	0.70184	614	120	2.3471	0.91619	1.5618	8.2632
-6.5023	0.64003	-6.5023	0.74035	-1.9265	0.83552	-3.1208	1.5088	2.6295	0.59332	-0.40546	0.92131	-2.6197	0.84572	4.5757	0.50211	-0.69315	0.0505	0.50108	0.42493	3.0349	0.42493	-2.2142	2.084	-7.1954	0.68827	5.7503	2.084	-3.3815	0.75009	-6.0968	2.2461	-3.3815	0.7689	-6.0968	2.3461	3.536	-5.8091	2.7153	-3.5262	0.9343	3	8	0.87323	13756	121	2.4767	1.0855	1.2816	9.2008
-6.5023	2.2088	-6.5023	2.3114	-1.9265	5.3081	-3.1208	1.5979	3.6019	2.0206	-7.3008	4.0456	-2.6197	5.2572	4.5757	2.6649	-0.69315	0.051484	0.50108	6.179	10.903	6.179	4.6811	1.6758	-7.1954	2.2585	6.7226	1.6758	-3.3815	3.9587	0.79851	1.1124	-3.3815	4.0585	0.79851	1.0089	11.404	-5.8091	-4.18	-10.422	0.9343	0	1	2.9154	5308	122	0.87781	0.075405	10.641	1.1558
-6.5023	0.55105	-6.5023	0.61117	-1.9265	0.70114	-3.1208	1.286	3.6019	0.7137	-5.577	1.416	-2.6197	0.69116	4.5757	0.14131	-0.69315	0.037356	0.50108	2.352	9.1788	2.3521	2.9573	0.43407	-7.1954	0.57092	6.7226	0.43408	-3.3815	2.2003	-0.92532	0.58359	-3.3815	2.2754	-0.92532	0.50622	9.6799	-5.8091	-2.4562	-8.6977	0.9343	4	12	0.87985	156	123	1.5529	0.19677	6.892	3.6174
-6.5023	0.19227	-6.5023	0.2343	-1.9265	0.22955	-3.1208	0.56529	3.6019	0.21894	-3.8531	0.49674	-2.6197	0.21845	4.5757	0.057013	-0.69315	0.02083	0.50108	0.4758	7.455	0.4758	1.2334	0.54133	-7.1954	0.21237	6.7226	0.54133	-3.3815	0.52803	-2.6491	0.49455	-3.3815	0.4945	-2.6491	0.53959	7.9561	-5.8091	-0.73237	-6.9739	0.9343	6	18	0.32285	190	124	2.0543	0.53113	2.8679	6.3303
-6.5023	0.29629	-6.5023	0.28027	-1.9265	0.32244	-3.1208	0.60131	3.6019	0.28299	-2.1293	0.55855	-2.6197	0.32178	4.5757	0.28954	-0.69315	0.043811	0.50108	0.28772	5.7312	0.28772	-0.49039	0.72841	-7.1954	0.28827	6.7226	0.72841	-3.3815	0.44861	-4.373	0.81794	-3.3815	0.45444	-4.373	0.86576	6.2323	-5.8091	0.99147	-5.2501	0.9343	6	16	0.39031	20530	125	2.3443	0.91115	1.5729	8.2439
-6.5023	0.63925	-6.5023	0.74038	-1.9265	0.70306	-3.1208	1.2445	3.6019	0.45438	-0.40546	1.1565	-2.6197	0.68738	4.5757	0.51052	-0.69315	0.054723	0.50108	0.37592	4.0073	0.37592	-2.2142	2.0482	-7.1954	0.65904	6.7226	2.0482	-3.3815	0.61584	-6.0968	2.3772	-3.3815	0.64917	-6.0968	2.4851	4.5084	-5.8091	2.7153	-3.5262	0.9343	4	12	0.82302	1215	126	2.462	1.0608	1.3208	9.0922
-6.5023	3.2602	-6.5023	3.2722	-1.9265	4.0809	-1.1974	1.5189	-0.28768	0.45256	-7.3008	4.216	-2.6197	4.0391	4.5757	0.83237	-0.69315	0.03608	-1.4223	3.4857	7.0131	3.4857	4.6811	1.086	-7.1954	3.2934	0.90975	1.086	-5.3049	2.8681	0.79851	0.009475	-5.3049	2.8982	0.79851	0.078181	5.5908	-5.8091	-6.1034	-8.4982	0.21414	1	4	2.8001	1217	127	0.8869	0.09881	7.9759	1.1799
-6.5023	2.396	-6.5023	2.3798	-1.9265	2.2731	-1.1974	1.2487	-0.28768	0.86292	-5.577	4.3235	-2.6197	2.2913	4.5757	0.1278	-0.69315	0.021164	-1.4223	3.6431	5.2893	3.6431	2.9573	0.36637	-7.1954	2.3917	0.90975	0.36637	-5.3049	3.6304	-0.92532	0.21455	-5.3049	3.6911	-0.92532	0.17186	3.867	-5.8091	-4.3795	-6.7744	0.21414	0	6	2.2473	686	128	1.5874	0.27607	4.75	3.7797
-6.5023	3.0065	-6.5023	3.0148	-1.9265	4.0809	-1.1974	1.4514	0.68471	0.74367	-7.3008	4.7128	-2.6197	4.0368	4.5757	0.95014	-0.69315	0.037983	-1.4223	4.7788	7.9855	4.7788	4.6811	1.2224	-7.1954	3.0377	1.8821	1.2224	-5.3049	3.8784	0.79851	0.038261	-5.3049	3.9381	0.79851	0.092376	6.5632	-5.8091	-6.1034	-8.4982	0.21414	1	4	2.835	1887	129	0.88165	0.084768	9.4008	1.166
-6.5023	2.1838	-6.5023	2.2139	-1.9265	2.1159	-1.1974	1.3164	0.68471	0.86046	-5.577	3.6802	-2.6197	2.1218	4.5757	0.11466	-0.69315	0.022323	-1.4223	3.8794	6.2617	3.8794	2.9573	0.40112	-7.1954	2.1851	1.8821	0.40112	-5.3049	3.8836	-0.92532	0.35798	-5.3049	3.9611	-0.92532	0.28806	4.8394	-5.8091	-4.3795	-6.7744	0.21414	0	6	2.0618	658	130	1.5709	0.23502	5.6841	3.7016
-6.5023	2.7163	-6.5023	2.7755	-1.9265	3.9237	-1.1974	1.5859	1.6571	1.0445	-7.3008	4.5511	-2.6197	3.8862	4.5757	0.99228	-0.69315	0.038637	-1.4223	5.3828	8.9579	5.3828	4.6811	1.3124	-7.1954	2.7289	2.8545	1.3124	-5.3049	4.301	0.79851	0.075423	-5.3049	4.3472	0.79851	0.099691	7.5356	-5.8091	-6.1034	-8.4982	0.21414	0	3	2.7662	2351	131	0.87966	0.079356	10.085	1.1607
-6.5023	1.9658	-6.5023	1.9833	-1.9265	2.0373	-1.1974	1.4509	1.6571	1.0073	-5.577	3.242	-2.6197	2.0002	4.5757	0.11442	-0.69315	0.022712	-1.4223	3.9352	7.2341	3.9352	2.9573	0.41972	-7.1954	1.9724	2.8545	0.41972	-5.3049	3.9015	-0.92532	0.36757	-5.3049	3.9766	-0.92532	0.30241	5.8118	-5.8091	-4.3795	-6.7744	0.21414	0	6	1.9478	608	132	1.5646	0.21898	6.1453	3.6721
-6.5023	1.107	-6.5023	1.0343	-1.9265	1.0654	-1.1974	0.98995	1.6571	0.91718	-3.8531	2.3693	-2.6197	1.1077	4.5757	0.171	-0.69315	0.039296	-1.4223	1.918	5.5102	1.918	1.2334	0.82362	-7.1954	1.0707	2.8545	0.82361	-5.3049	1.8813	-2.6491	0.70252	-5.3049	1.7856	-2.6491	0.77864	4.088	-5.8091	-2.6557	-5.0506	0.21414	0	3	1.2472	747	133	2.1582	0.73934	1.9191	6.9868
-6.5023	2.408	-6.5023	2.4865	-1.9265	3.7665	-1.1974	1.6539	2.6295	1.2335	-7.3008	4.0524	-2.6197	3.7291	4.5757	1.0236	-0.69315	0.039296	-1.4223	5.5194	9.9303	5.5194	4.6811	1.3345	-7.1954	2.4463	3.8269	1.3345	-5.3049	4.5165	0.79851	0.10512	-5.3049	4.5796	0.79851	0.10523	8.508	-5.8091	-6.1034	-8.4982	0.21414	0	3	2.6001	2734	134	0.87891	0.077294	10.371	1.1587
-6.5023	1.5629	-6.5023	1.562	-1.9265	1.4085	-1.1974	1.5859	2.6295	0.89778	-5.577	2.8271	-2.6197	1.4329	4.5757	0.083628	-0.69315	0.030407	-1.4223	4.0771	8.2065	4.0771	2.9573	0.478	-7.1954	1.581	3.8269	0.478	-5.3049	4.054	-0.92532	0.51153	-5.3049	4.1322	-0.92532	0.43579	6.7842	-5.8091	-4.3795	-6.7744	0.21414	0	6	1.6407	523	135	1.5623	0.21283	6.3404	3.661
-6.5023	0.84493	-6.5023	0.77277	-1.9265	0.82383	-1.1974	0.98995	2.6295	0.7452	-3.8531	2.015	-2.6197	0.86065	4.5757	0.16006	-0.69315	0.039192	-1.4223	1.9403	6.4826	1.9403	1.2334	0.861	-7.1954	0.809	3.8269	0.861	-5.3049	1.9786	-2.6491	0.69694	-5.3049	1.8793	-2.6491	0.77961	5.0604	-5.8091	-2.6557	-5.0506	0.21414	1	4	1.0319	542	136	2.1485	0.72022	1.9831	6.9242
-6.5023	5.0415	-6.5023	6.8717	-1.9265	1.1086	-1.1974	2.1308	2.6295	1.0339	-2.1293	1.0778	-2.6197	1.693	4.5757	8.1342	-0.69315	0.50669	-1.4223	0.2831	4.7588	0.2831	-0.49039	1.3307	-7.1954	5.4467	3.8269	1.3307	-5.3049	8.0518	-4.373	6.3863	-5.3049	8.9234	-4.373	7.3007	3.3365	-5.8091	-0.93188	-3.3267	0.21414	0	3	2.8774	16163	137	2.9528	1.8031	0.63764	13.079
-6.5023	2.7311	-6.5023	2.8324	-1.9265	5.6548	-1.1974	1.7159	3.6019	2.9193	-7.3008	4.2666	-2.6197	5.6023	4.5757	2.6212	-0.69315	0.051739	-1.4223	7.3358	10.903	7.3358	4.6811	1.7385	-7.1954	2.7809	4.7993	1.7385	-5.3049	5.1805	0.79851	0.29628	-5.3049	5.285	0.79851	0.19571	9.4804	-5.8091	-6.1034	-8.4982	0.21414	0	3	3.3534	379	138	0.87862	0.076513	10.483	1.158
-6.5023	1.3009	-6.5023	1.3784	-1.9265	1.3299	-1.1974	1.8559	3.6019	1.0121	-5.577	2.2575	-2.6197	1.35	4.5757	0.066157	-0.69315	0.036268	-1.4223	4.0902	9.1788	4.0902	2.9573	0.44468	-7.1954	1.3381	4.7993	0.44468	-5.3049	4.0399	-0.92532	0.49712	-5.3049	4.1191	-0.92532	0.42774	7.7566	-5.8091	-4.3795	-6.7744	0.21414	0	6	1.5225	389	139	1.5614	0.21049	6.4176	3.6567
-6.5023	0.32679	-6.5023	0.31999	-1.9265	0.46534	-1.1974	1.3159	3.6019	0.34064	-3.8531	1.4544	-2.6197	0.47083	4.5757	0.24201	-0.69315	0.024318	-1.4223	1.8956	7.455	1.8956	1.2334	0.86334	-7.1954	0.32037	4.7993	0.86334	-5.3049	1.7384	-2.6491	0.65508	-5.3049	1.6096	-2.6491	0.70142	6.0327	-5.8091	-2.6557	-5.0506	0.21414	4	10	0.70384	2237	140	2.1449	0.71289	2.0087	6.9006
-6.5023	5.1158	-6.5023	7.9231	-1.9265	1.3501	-1.1974	2.8568	3.6019	1.4862	-2.1293	1.1895	-2.6197	2.3911	4.5757	8.8986	-0.69315	0.80565	-1.4223	0.27378	5.7312	0.27379	-0.49039	1.3434	-7.1954	5.6311	4.7993	1.3434	-5.3049	8.6572	-4.373	7.0204	-5.3049	10.94	-4.373	9.3138	4.3089	-5.8091	-0.93188	-3.3267	0.21414	0	2	3.3203	13755	141	2.9378	1.7857	0.64521	12.946
-6.5023	3.2341	-6.5023	3.1846	-1.9265	2.8233	0.72595	0.337	-0.28768	0.30334	-7.3008	3.3601	-2.6197	2.8425	4.5757	0.33966	-0.69315	0.021288	-3.3456	3.1887	7.0131	3.1887	4.6811	0.37035	-7.1954	3.2079	-1.0136	0.37035	-7.2282	3.5616	0.79851	0.010244	-7.2282	3.5007	0.79851	0.053901	3.6675	-5.8091	-8.0268	-6.5748	0.034581	2	8	2.2071	612	142	0.93484	0.21433	3.3617	1.3109
-6.5023	3.2244	-6.5023	3.1893	-1.9265	3.2949	0.72595	0.40449	0.68471	0.89289	-7.3008	4.0282	-2.6197	3.2588	4.5757	0.386	-0.69315	0.023464	-3.3456	4.6074	7.9855	4.6074	4.6811	0.83864	-7.1954	3.2091	-0.041241	0.83864	-7.2282	4.3516	0.79851	0.0089663	-7.2282	4.346	0.79851	0.072707	4.6399	-5.8091	-8.0268	-6.5748	0.034581	1	5	2.5057	871	143	0.90022	0.13308	5.7644	1.2156
-6.5023	3.261	-6.5023	3.3372	-1.9265	4.0809	0.72595	0.80946	1.6571	1.4922	-7.3008	4.1166	-2.6197	4.0421	4.5757	0.84485	-0.69315	0.036194	-3.3456	5.3965	8.9579	5.3965	4.6811	1.0903	-7.1954	3.2984	0.93113	1.0903	-7.2282	4.7874	0.79851	0.0096218	-7.2282	4.8467	0.79851	0.077958	5.6122	-5.8091	-8.0268	-6.5748	0.034581	0	3	2.8496	1254	144	0.88678	0.098426	8.0096	1.1796
-6.5023	2.4216	-6.5023	2.4186	-1.9265	2.2731	0.72595	1.7544	1.6571	1.0072	-5.577	4.1422	-2.6197	2.2915	4.5757	0.13738	-0.69315	0.021074	-3.3456	5.3427	7.2341	5.3427	2.9573	0.35911	-7.1954	2.4369	0.93113	0.35911	-7.2282	5.4402	-0.92532	0.17923	-7.2282	5.4942	-0.92532	0.15057	3.8884	-5.8091	-6.3029	-4.851	0.034581	0	6	2.3362	692	145	1.5876	0.27644	4.7431	3.7807
-6.5023	2.8846	-6.5023	2.9334	-1.9265	3.9237	0.72595	1.5519	2.6295	2.2408	-7.3008	4.662	-2.6197	3.9427	4.5757	0.95598	-0.69315	0.037906	-3.3456	6.5758	9.9303	6.5758	4.6811	1.2055	-7.1954	2.8999	1.9035	1.2055	-7.2282	5.7185	0.79851	0.033342	-7.2282	5.7441	0.79851	0.090959	6.5846	-5.8091	-8.0268	-6.5748	0.034581	0	3	3.0327	1833	146	0.88164	0.084675	9.4121	1.1659
-6.5023	1.9963	-6.5023	2.0109	-1.9265	1.923	0.72595	2.2575	2.6295	1.3997	-5.577	3.2959	-2.6197	1.9094	4.5757	0.10056	-0.69315	0.0068017	-3.3456	5.0267	8.2065	5.0267	2.9573	0.28478	-7.1954	2.0032	1.9035	0.28478	-7.2282	5.2013	-0.92532	0.11983	-7.2282	5.2126	-0.92532	0.10959	4.8608	-5.8091	-6.3029	-4.851	0.034581	0	6	2.1472	9525	147	1.5715	0.23628	5.6509	3.7044
-6.5023	2.662	-6.5023	2.7361	-1.9265	3.8451	0.72595	2.2943	3.6019	2.7282	-7.3008	4.4988	-2.6197	3.83	4.5757	0.99485	-0.69315	0.038713	-3.3456	7.1727	10.903	7.1727	4.6811	1.3165	-7.1954	2.7003	2.8759	1.3165	-7.2282	6.143	0.79851	0.066622	-7.2282	6.1918	0.79851	0.099143	7.557	-5.8091	-8.0268	-6.5748	0.034581	0	3	3.1274	2333	148	0.87968	0.079377	10.082	1.1608
-6.5023	1.8987	-6.5023	1.9656	-1.9265	1.8801	0.72595	2.7668	3.6019	1.5717	-5.577	3.1058	-2.6197	1.9013	4.5757	0.11968	-0.69315	0.021918	-3.3456	5.733	9.1788	5.733	2.9573	0.38688	-7.1954	1.9316	2.8759	0.38688	-7.2282	5.7268	-0.92532	0.29713	-7.2282	5.7963	-0.92532	0.23219	5.8332	-5.8091	-6.3029	-4.851	0.034581	0	6	2.1981	604	149	1.5653	0.2206	6.0959	3.6755
-6.5023	1.0465	-6.5023	0.90522	-1.9265	1.4277	0.72595	1.7725	3.6019	0.74099	-3.8531	2.4917	-2.6197	1.4663	4.5757	0.24325	-0.69315	0.041025	-3.3456	3.4302	7.455	3.4302	1.2334	0.62197	-7.1954	0.97801	2.8759	0.62196	-7.2282	3.0498	-2.6491	0.56096	-7.2282	2.9124	-2.6491	0.64411	4.1094	-5.8091	-4.5791	-3.1272	0.034581	1	7	1.3974	701	150	2.1733	0.777	1.7971	7.085
-6.5023	0.98788	-6.5023	0.96284	0.34656	0.786	-6.9675	3.2877	-0.28768	2.6536	-3.8531	2.3855	-0.34658	0.78396	6.8489	1.2754	-0.69315	0.013726	6.6209	3.0652	3.5655	3.0652	3.5066	1.8146	-7.1954	0.9767	6.6798	1.8146	0.46522	1.855	-2.6491	3.0634	0.46522	1.8904	-2.6491	3.0315	10.186	-5.8091	3.1144	-10.821	5.195	0	1	1.8439	99	151	0.97779	0.0080219	120.89	1.4341
-6.5023	1.4403	-6.5023	1.3938	0.34656	0.8646	-6.9675	4.8254	-0.28768	2.0194	-2.1293	2.1293	-0.34658	0.86092	6.8489	1.3323	-0.69315	0.017768	6.6209	3.9679	1.8416	3.9679	1.7827	3.3566	-7.1954	1.4145	6.6798	3.3566	0.46522	2.6803	-4.373	4.816	0.46522	2.7261	-4.373	4.7801	8.4625	-5.8091	4.8382	-9.0968	5.195	0	1	2.1121	147	152	0.98072	0.0093408	103.99	1.4427
-6.5023	1.9474	-6.5023	1.9038	0.34656	0.9432	-6.9675	6.0066	-0.28768	1.0494	-0.40546	3.2257	-0.34658	0.96359	6.8489	1.3935	-0.69315	0.019714	6.6209	4.7167	0.11778	4.7167	0.058877	5.0688	-7.1954	1.9253	6.6798	5.0688	0.46522	3.296	-6.0968	6.5503	0.46522	3.3366	-6.0968	6.5062	6.7387	-5.8091	6.562	-7.373	5.195	0	1	2.5127	180	153	0.98281	0.015258	63.414	1.4489
-6.5023	1.0141	-6.5023	1.0232	0.34656	3.6513	-6.9675	2.1229	0.68471	0.73688	-3.8531	2.2277	-0.34658	3.6472	6.8489	2.2971	-0.69315	0.0044378	6.6209	2.3018	4.5379	2.3017	3.5066	2.2291	-7.1954	1.0186	7.6522	2.2291	0.46522	0.011793	-2.6491	2.4802	0.46522	0.020121	-2.6491	2.4711	11.159	-5.8091	3.1144	-10.821	5.195	1	4	1.796	3218	154	0.97775	0.0078793	123.09	1.434
-6.5023	1.3519	-6.5023	1.3044	0.34656	1.1397	-6.9675	4.1013	0.68471	1.7185	-2.1293	2.007	-0.34658	1.1392	6.8489	1.362	-0.69315	0.016325	6.6209	3.3691	2.814	3.3691	1.7827	3.268	-7.1954	1.3279	7.6522	3.268	0.46522	1.9692	-4.373	4.7811	0.46522	2.004	-4.373	4.739	9.4349	-5.8091	4.8382	-9.0968	5.195	0	1	1.9371	138	155	0.98045	0.0085446	113.74	1.4419
-6.5023	1.7705	-6.5023	1.7361	0.34656	1.179	-6.9675	5.3171	0.68471	0.93264	-0.40546	3.192	-0.34658	1.1544	6.8489	1.3348	-0.69315	0.01685	6.6209	4.5043	1.0902	4.5043	0.058877	5.0394	-7.1954	1.7521	7.6522	5.0394	0.46522	2.9652	-6.0968	6.5435	0.46522	3.0124	-6.0968	6.5005	7.7111	-5.8091	6.562	-7.373	5.195	0	1	2.3545	156	156	0.98131	0.010824	89.663	1.4445
-6.5023	0.88143	-6.5023	0.87988	0.34656	1.179	-6.9675	3.2937	1.6571	1.2684	-2.1293	2.533	-0.34658	1.1597	6.8489	1.4235	-0.69315	0.013448	6.6209	3.3067	3.7864	3.3067	1.7827	3.348	-7.1954	0.88387	8.6246	3.348	0.46522	1.9992	-4.373	4.7888	0.46522	2.0386	-4.373	4.7511	10.407	-5.8091	4.8382	-9.0968	5.195	0	1	1.6726	111	157	0.98035	0.0082433	117.93	1.4416
-6.5023	1.5934	-6.5023	1.5618	0.34656	0.8646	-6.9675	4.5217	1.6571	1.0818	-0.40546	3.7437	-0.34658	0.88894	6.8489	1.3578	-0.69315	0.017713	6.6209	3.9749	2.0625	3.9749	0.058877	5.001	-7.1954	1.5787	8.6246	5.001	0.46522	2.6506	-6.0968	6.538	0.46522	2.6888	-6.0968	6.4958	8.6835	-5.8091	6.562	-7.373	5.195	0	1	2.2278	163	158	0.98074	0.0091386	106.32	1.4428
-6.5023	0.38089	-6.5023	0.36647	0.34656	2.6724	-6.9675	2.9464	2.6295	1.0794	-2.1293	3.8145	-0.34658	2.6676	6.8489	1.8104	-0.69315	0.0050124	6.6209	2.6766	4.7588	2.6766	1.7827	3.4123	-7.1954	0.38429	9.597	3.4123	0.46522	1.8253	-4.373	4.766	0.46522	1.8472	-4.373	4.7441	11.38	-5.8091	4.8382	-9.0968	5.195	2	4	1.8767	85	159	0.98031	0.0081292	119.59	1.4415
-6.5023	0.88151	-6.5023	0.87782	0.34656	0.9432	-6.9675	3.9027	2.6295	0.85557	-0.40546	4.057	-0.34658	0.96435	6.8489	1.4232	-0.69315	0.016044	6.6209	3.3279	3.0349	3.3279	0.058877	4.9791	-7.1954	0.88608	9.597	4.9791	0.46522	1.8308	-6.0968	6.4903	0.46522	1.8819	-6.0968	6.4536	9.6559	-5.8091	6.562	-7.373	5.195	0	1	1.9196	125	160	0.98053	0.0085001	114.35	1.4421
-6.5023	0.38053	-6.5023	0.36647	0.34656	1.179	-6.9675	4.0534	3.6019	1.1241	-0.40546	5.4369	-0.34658	1.1545	6.8489	1.3892	-0.69315	0.0096791	6.6209	3.2143	4.0073	3.2143	0.058877	5.2021	-7.1954	0.37342	10.569	5.2021	0.46522	2.4548	-6.0968	6.5363	0.46522	2.4842	-6.0968	6.5024	10.628	-5.8091	6.562	-7.373	5.195	2	4	2.0901	109	161	0.98044	0.0082585	117.72	1.4419
-6.5023	0.40843	-6.5023	0.40547	0.34656	1.0218	-5.0441	1.3697	-0.28768	3.0639	-5.577	1.1683	-0.34658	1.0004	6.8489	1.0994	-0.69315	0.018086	4.6976	1.7552	5.2893	1.7552	5.2304	1.0044	-7.1954	0.3923	4.7565	1.0044	-1.4581	0.78104	-0.92532	0.23798	-1.4581	0.78927	-0.92532	0.20681	9.9868	-5.8091	-0.53283	-10.621	4.3287	2	6	1.2396	111	162	1.4081	0.015365	90.641	2.9741
-6.5023	1.1373	-6.5023	1.1485	0.34656	1.4541	-5.0441	2.2608	-0.28768	2.9147	-3.8531	3.3639	-0.34658	1.4597	6.8489	0.59383	-0.69315	0.0081351	4.6976	1.0378	3.5655	1.0378	3.5066	0.70483	-7.1954	1.1436	4.7565	0.70483	-1.4581	0.094154	-2.6491	1.2539	-1.4581	0.10999	-2.6491	1.2213	8.263	-5.8091	1.191	-8.8973	4.3287	0	6	2.0465	120	163	1.637	0.026406	60.996	4.0199
-6.5023	1.3937	-6.5023	1.3985	0.34656	1.572	-5.0441	3.0033	-0.28768	1.7956	-2.1293	1.8235	-0.34658	1.5782	6.8489	0.47553	-0.69315	0.0077654	4.6976	0.68821	1.8416	0.68822	1.7827	1.9234	-7.1954	1.4061	4.7565	1.9234	-1.4581	0.059264	-4.373	1.7409	-1.4581	0.044272	-4.373	1.7475	6.5392	-5.8091	2.9148	-7.1734	4.3287	0	6	1.8311	125	164	1.6633	0.036077	45.106	4.15
-6.5023	2.1703	-6.5023	2.1609	0.34656	1.7292	-5.0441	3.7457	-0.28768	0.45256	-0.40546	0.28314	-0.34658	1.7485	6.8489	0.35676	-0.69315	0.0057722	4.6976	0.48563	0.11778	0.48563	0.058877	3.5828	-7.1954	2.1711	4.7565	3.5828	-1.4581	0.15325	-6.0968	3.6733	-1.4581	0.15057	-6.0968	3.6622	4.8153	-5.8091	4.6387	-5.4496	4.3287	2	8	1.757	177	165	1.6728	0.060582	26.612	4.1973
-6.5023	0.31325	-6.5023	0.31989	0.34656	0.78598	-5.0441	1.1559	0.68471	2.5019	-5.577	0.65671	-0.34658	0.77094	6.8489	1.0905	-0.69315	0.018288	4.6976	2.0672	6.2617	2.0672	5.2304	0.94269	-7.1954	0.30624	5.7289	0.94269	-1.4581	0.78699	-0.92532	0.23111	-1.4581	0.80184	-0.92532	0.20168	10.959	-5.8091	-0.53283	-10.621	4.3287	3	7	0.95561	66	166	1.4081	0.015245	91.363	2.974
-6.5023	0.82972	-6.5023	0.81105	0.34656	2.358	-5.0441	1.3834	0.68471	1.9796	-3.8531	3.3639	-0.34658	2.3494	6.8489	0.76436	-0.69315	0.010663	4.6976	1.8288	4.5379	1.8288	3.5066	0.77844	-7.1954	0.81099	5.7289	0.77844	-1.4581	0.093248	-2.6491	1.8845	-1.4581	0.11294	-2.6491	1.8702	9.2354	-5.8091	1.191	-8.8973	4.3287	0	3	1.7876	75	167	1.6368	0.025828	62.376	4.0189
-6.5023	1.7369	-6.5023	1.7474	0.34656	2.1222	-5.0441	2.8008	0.68471	1.6439	-2.1293	1.8235	-0.34658	2.1297	6.8489	0.52239	-0.69315	0.0083007	4.6976	0.77301	2.814	0.77301	1.7827	1.911	-7.1954	1.7436	5.7289	1.911	-1.4581	0.031411	-4.373	1.7634	-1.4581	0.046373	-4.373	1.7707	7.5116	-5.8091	2.9148	-7.1734	4.3287	0	4	1.9791	144	168	1.6623	0.032901	49.522	4.1446
-6.5023	2.2175	-6.5023	2.2332	0.34656	2.6509	-5.0441	4.3286	0.68471	0.66566	-0.40546	1.3437	-0.34658	2.645	6.8489	0.40509	-0.69315	0.0061017	4.6976	1.1208	1.0902	1.1208	0.058877	4.8981	-7.1954	2.2228	5.7289	4.8981	-1.4581	1.3918	-6.0968	4.567	-1.4581	1.382	-6.0968	4.5777	5.7877	-5.8091	4.6387	-5.4496	4.3287	1	3	2.24	9336	169	1.6667	0.043083	37.686	4.167
-6.5023	0.37528	-6.5023	0.37352	0.34656	1.572	-5.0441	1.6034	1.6571	1.399	-3.8531	3.1804	-0.34658	1.5629	6.8489	1.2421	-0.69315	0.012642	4.6976	2.5303	5.5102	2.5303	3.5066	0.67567	-7.1954	0.38541	6.7012	0.67567	-1.4581	0.098513	-2.6491	1.2534	-1.4581	0.12233	-2.6491	1.2244	10.208	-5.8091	1.191	-8.8973	4.3287	2	8	1.4172	50	170	1.6368	0.025609	62.915	4.0186
-6.5023	1.7384	-6.5023	1.7556	0.34656	2.358	-5.0441	2.3958	1.6571	1.2684	-2.1293	1.8235	-0.34658	2.3457	6.8489	0.54475	-0.69315	0.0088878	4.6976	0.71778	3.7864	0.71778	1.7827	1.488	-7.1954	1.7467	6.7012	1.488	-1.4581	0.020248	-4.373	1.3118	-1.4581	0.033364	-4.373	1.319	8.4839	-5.8091	2.9148	-7.1734	4.3287	0	6	1.8899	113	171	1.6618	0.031698	51.427	4.1426
-6.5023	1.9092	-6.5023	1.9051	0.34656	2.2794	-5.0441	3.3408	1.6571	0.59688	-0.40546	0.26731	-0.34658	2.2678	6.8489	0.53331	-0.69315	0.0085885	4.6976	0.67641	2.0625	0.6764	0.058877	3.6834	-7.1954	1.9146	6.7012	3.6834	-1.4581	0.13747	-6.0968	3.5857	-1.4581	0.1269	-6.0968	3.6026	6.7601	-5.8091	4.6387	-5.4496	4.3287	2	8	1.7164	159	172	1.6645	0.036389	44.741	4.1556
-6.5023	0.20863	-6.5023	0.21938	0.34656	3.2226	-5.0441	0.50646	2.6295	0.74366	-3.8531	3.425	-0.34658	3.2105	6.8489	3.0042	-0.69315	0.012577	4.6976	3.1095	6.4826	3.1095	3.5066	0.58841	-7.1954	0.20898	7.6736	0.58841	-1.4581	0.098429	-2.6491	2.6435	-1.4581	0.1225	-2.6491	2.618	11.18	-5.8091	1.191	-8.8973	4.3287	4	10	1.3876	17	173	1.6367	0.025526	63.121	4.0184
-6.5023	1.0523	-6.5023	1.0676	0.34656	2.1222	-5.0441	1.6565	2.6295	0.78096	-2.1293	1.7623	-0.34658	2.114	6.8489	0.79617	-0.69315	0.012611	4.6976	1.6321	4.7588	1.6321	1.7827	2.0679	-7.1954	1.0599	7.6736	2.0679	-1.4581	0.020411	-4.373	1.4228	-1.4581	0.044307	-4.373	1.4325	9.4563	-5.8091	2.9148	-7.1734	4.3287	0	3	1.407	57	174	1.6617	0.031243	52.186	4.1419
-6.5023	1.891	-6.5023	1.8646	0.34656	2.0043	-5.0441	3.0708	2.6295	0.57823	-0.40546	0.22198	-0.34658	2.0075	6.8489	0.43391	-0.69315	0.0066687	4.6976	0.50362	3.0349	0.50362	0.058877	3.7447	-7.1954	1.8777	7.6736	3.7447	-1.4581	0.086468	-6.0968	3.3719	-1.4581	0.08664	-6.0968	3.372	7.7325	-5.8091	4.6387	-5.4496	4.3287	2	8	1.6051	134	175	1.6636	0.033846	48.152	4.1513
-6.5023	1.0936	-6.5023	1.1224	0.34656	3.7335	-5.0441	1.7209	3.6019	0.48497	-2.1293	1.9152	-0.34658	3.719	6.8489	2.1561	-0.69315	0.014445	4.6976	2.3923	5.7312	2.3923	1.7827	2.1828	-7.1954	1.1078	8.646	2.1828	-1.4581	0.017471	-4.373	0.84657	-1.4581	0.044241	-4.373	0.81699	10.429	-5.8091	2.9148	-7.1734	4.3287	1	4	1.6784	18	176	1.6616	0.031071	52.479	4.1415
-6.5023	1.0508	-6.5023	1.0494	0.34656	1.3362	-5.0441	1.9909	3.6019	0.41526	-0.40546	0.22198	-0.34658	1.3264	6.8489	0.57978	-0.69315	0.010457	4.6976	0.88796	4.0073	0.88796	0.058877	3.1895	-7.1954	1.0545	8.646	3.1895	-1.4581	0.016276	-6.0968	2.3756	-1.4581	0.038697	-6.0968	2.3844	8.7049	-5.8091	4.6387	-5.4496	4.3287	2	6	1.0107	87	177	1.6633	0.032882	49.582	4.1496
-6.5023	1.139	-6.5023	1.1476	0.34656	0.86458	-3.1208	2.0923	-0.28768	2.6349	-7.3008	2.0382	-0.34658	0.84631	6.8489	1.4182	-0.69315	0.013338	2.7742	2.1811	7.0131	2.1811	6.9542	1.6093	-7.1954	1.1433	2.8331	1.6093	-3.3815	2.3261	0.79851	0.012886	-3.3815	2.3076	0.79851	0.048947	9.7873	-5.8091	-4.18	-10.422	2.7729	0	3	1.6528	130	178	0.85905	0.0084783	100.32	1.107
-6.5023	1.0516	-6.5023	1.0722	0.34656	1.8864	-3.1208	1.6199	-0.28768	2.2805	-5.577	5.0877	-0.34658	1.8943	6.8489	0.7582	-0.69315	0.0089462	2.7742	2.8072	5.2893	2.8072	5.2304	1.5398	-7.1954	1.0618	2.8331	1.5398	-3.3815	2.4615	-0.92532	2.2967	-3.3815	2.4618	-0.92532	2.2912	8.0635	-5.8091	-2.4562	-8.6977	2.7729	0	1	2.1664	113	179	1.497	0.022923	64.303	3.3613
-6.5023	2.5203	-6.5023	2.5282	0.34656	2.5938	-3.1208	1.8561	-0.28768	2.7282	-3.8531	3.5473	-0.34658	2.5945	6.8489	0.14837	-0.69315	0.0049508	2.7742	0.83412	3.5655	0.83412	3.5066	0.85343	-7.1954	2.5191	2.8331	0.85343	-3.3815	0.78727	-2.6491	0.86862	-3.3815	0.79679	-2.6491	0.8581	6.3397	-5.8091	-0.73237	-6.9739	2.7729	0	2	2.629	186	180	1.8762	0.070769	25.511	5.2801
-6.5023	0.65799	-6.5023	0.63935	0.34656	0.63894	-3.1208	1.886	-0.28768	1.4899	-2.1293	0.87149	-0.34658	0.65267	6.8489	0.083462	-0.69315	0.010137	2.7742	0.8135	1.8416	0.81349	1.7827	0.89234	-7.1954	0.64888	2.8331	0.89234	-3.3815	0.74532	-4.373	0.88854	-3.3815	0.76232	-4.373	0.86953	4.6158	-5.8091	0.99147	-5.2501	2.7729	3	8	1.0306	1882	181	1.9855	0.162	11.256	5.913
-6.5023	0.47148	-6.5023	0.45156	0.34656	1.0218	-3.1208	1.5006	0.68471	1.2684	-7.3008	0.72046	-0.34658	1.0403	6.8489	1.4614	-0.69315	0.0058145	2.7742	1.1058	7.9855	1.1058	6.9542	1.7324	-7.1954	0.46153	3.8055	1.7324	-3.3815	2.2931	0.79851	0.0074896	-3.3815	2.2582	0.79851	0.032071	10.76	-5.8091	-4.18	-10.422	2.7729	3	7	0.90571	132	182	0.85897	0.0082368	103.29	1.1068
-6.5023	1.3395	-6.5023	1.311	0.34656	2.4366	-3.1208	1.1474	0.68471	2.1662	-5.577	5.1488	-0.34658	2.426	6.8489	0.75823	-0.69315	0.0084265	2.7742	2.7485	6.2617	2.7485	5.2304	1.8927	-7.1954	1.323	3.8055	1.8927	-3.3815	2.4615	-0.92532	2.8825	-3.3815	2.4627	-0.92532	2.8955	9.0359	-5.8091	-2.4562	-8.6977	2.7729	0	1	2.2582	97	183	1.4967	0.022151	66.569	3.3602
-6.5023	1.7379	-6.5023	1.7369	0.34656	1.8864	-3.1208	1.1474	0.68471	2.6138	-3.8531	3.4862	-0.34658	1.8878	6.8489	0.16688	-0.69315	0.0048752	2.7742	0.96346	4.5379	0.96346	3.5066	1.5783	-7.1954	1.7465	3.8055	1.5783	-3.3815	0.84891	-2.6491	1.7907	-3.3815	0.84368	-2.6491	1.7951	7.312	-5.8091	-0.73237	-6.9739	2.7729	0	2	2.1014	129	184	1.875	0.067389	26.824	5.2735
-6.5023	1.9076	-6.5023	1.909	0.34656	1.8864	-3.1208	1.9573	0.68471	1.905	-2.1293	1.8235	-0.34658	1.8861	6.8489	0.082659	-0.69315	0.004307	2.7742	0.22904	2.814	0.22904	1.7827	0.78313	-7.1954	1.9133	3.8055	0.78313	-3.3815	0.13127	-4.373	0.82951	-3.3815	0.14082	-4.373	0.82945	5.5882	-5.8091	0.99147	-5.2501	2.7729	0	6	1.8982	368	185	1.9792	0.14486	12.663	5.8761
-6.5023	1.7382	-6.5023	1.7388	0.34656	1.572	-3.1208	1.8224	0.68471	0.4128	-0.40546	0.20615	-0.34658	1.5693	6.8489	0.11341	-0.69315	0.005518	2.7742	0.26544	1.0902	0.26543	0.058877	1.5144	-7.1954	1.7436	3.8055	1.5144	-3.3815	0.17985	-6.0968	1.6519	-3.3815	0.18781	-6.0968	1.6532	3.8644	-5.8091	2.7153	-3.5262	2.7729	2	8	1.2484	585	186	2.0155	0.22562	7.9333	6.0935
-6.5023	0.70876	-6.5023	0.72327	0.34656	2.2008	-3.1208	1.1474	1.6571	1.343	-5.577	4.9654	-0.34658	2.1913	6.8489	1.1181	-0.69315	0.0099528	2.7742	3.5625	7.2341	3.5625	5.2304	1.2822	-7.1954	0.71729	4.7779	1.2822	-3.3815	2.463	-0.92532	3.3138	-3.3815	2.4792	-0.92532	3.2932	10.008	-5.8091	-2.4562	-8.6977	2.7729	2	4	1.8481	67	187	1.4966	0.021858	67.468	3.3597
-6.5023	1.0958	-6.5023	1.1067	0.34656	1.4148	-3.1208	0.67495	1.6571	2.2197	-3.8531	3.3027	-0.34658	1.4098	6.8489	0.29497	-0.69315	0.006237	2.7742	1.1815	5.5102	1.1815	3.5066	1.9239	-7.1954	1.1012	4.7779	1.9239	-3.3815	0.89408	-2.6491	2.2141	-3.3815	0.89927	-2.6491	2.2167	8.2844	-5.8091	-0.73237	-6.9739	2.7729	1	3	1.6358	28	188	1.8746	0.066108	27.356	5.271
-6.5023	1.3105	-6.5023	1.3109	0.34656	1.3755	-3.1208	1.2486	1.6571	1.772	-2.1293	1.7623	-0.34658	1.379	6.8489	0.090559	-0.69315	0.0055998	2.7742	0.20822	3.7864	0.20823	1.7827	0.73889	-7.1954	1.3136	4.7779	0.73889	-3.3815	0.10935	-4.373	0.78517	-3.3815	0.11721	-4.373	0.79576	6.5606	-5.8091	0.99147	-5.2501	2.7729	0	8	1.4633	276	189	1.9769	0.13832	13.292	5.8622
-6.5023	1.7463	-6.5023	1.7439	0.34656	1.572	-3.1208	1.8899	1.6571	0.41037	-0.40546	0.16082	-0.34658	1.5847	6.8489	0.10858	-0.69315	0.0050981	2.7742	0.26731	2.0625	0.26732	0.058877	1.5487	-7.1954	1.7448	4.7779	1.5487	-3.3815	0.17971	-6.0968	1.7022	-3.3815	0.18187	-6.0968	1.6912	4.8367	-5.8091	2.7153	-3.5262	2.7729	2	8	1.2539	457	190	2.0025	0.19089	9.4905	6.0152
-6.5023	0.73946	-6.5023	0.72722	0.34656	3.3798	-3.1208	1.4174	2.6295	0.74856	-5.577	5.0265	-0.34658	3.3699	6.8489	2.2006	-0.69315	0.010504	2.7742	4.6871	8.2065	4.6871	5.2304	1.1235	-7.1954	0.72339	5.7503	1.1235	-3.3815	2.469	-0.92532	4.0601	-3.3815	2.489	-0.92532	4.0386	10.981	-5.8091	-2.4562	-8.6977	2.7729	3	5	2.0065	29	191	1.4966	0.021748	67.815	3.3595
-6.5023	0.40547	-6.5023	0.39632	0.34656	0.60022	-3.1208	0.69089	2.6295	0.64192	-3.8531	1.001	-0.34658	0.5958	6.8489	0.21548	-0.69315	0.006231	2.7742	0.7846	6.4826	0.7846	3.5066	0.42856	-7.1954	0.4009	5.7503	0.42856	-3.3815	0.7047	-2.6491	0.29113	-3.3815	0.71278	-2.6491	0.27903	9.2568	-5.8091	-0.73237	-6.9739	2.7729	5	15	0.62264	5840	192	1.8744	0.065623	27.563	5.2701
-6.5023	0.40547	-6.5023	0.40547	0.34656	0.6288	-3.1208	0.40498	2.6295	1.2659	-2.1293	1.5789	-0.34658	0.61691	6.8489	0.16967	-0.69315	0.0078275	2.7742	0.32332	4.7588	0.32333	1.7827	0.95866	-7.1954	0.40384	5.7503	0.95866	-3.3815	0.15611	-4.373	1.1276	-3.3815	0.16491	-4.373	1.1171	7.533	-5.8091	0.99147	-5.2501	2.7729	4	12	0.78158	47	193	1.976	0.13583	13.547	5.8569
-6.5023	1.6564	-6.5023	1.6581	0.34656	1.4934	-3.1208	1.7549	2.6295	0.3706	-0.40546	0.20615	-0.34658	1.4933	6.8489	0.11903	-0.69315	0.0048901	2.7742	0.23669	3.0349	0.23669	0.058877	1.4358	-7.1954	1.6598	5.7503	1.4358	-3.3815	0.15262	-6.0968	1.5916	-3.3815	0.1622	-6.0968	1.5809	5.8091	-5.8091	2.7153	-3.5262	2.7729	2	8	1.1899	375	194	1.9976	0.17748	10.255	5.9856
-6.5023	0.24956	-6.5023	0.26318	0.34656	0.2501	-3.1208	0.51541	3.6019	0.25925	-3.8531	0.50559	-0.34658	0.24595	6.8489	0.19612	-0.69315	0.0064693	2.7742	0.6877	7.455	0.6877	3.5066	0.32555	-7.1954	0.25629	6.7226	0.32555	-3.3815	0.59495	-2.6491	0.2731	-3.3815	0.60318	-2.6491	0.2607	10.229	-5.8091	-0.73237	-6.9739	2.7729	6	18	0.34052	2374	195	1.8743	0.06544	27.642	5.2697
-6.5023	0.24959	-6.5023	0.26203	0.34656	0.25008	-3.1208	0.51541	3.6019	0.26302	-2.1293	0.53244	-0.34658	0.24457	6.8489	0.066781	-0.69315	0.0061021	2.7742	0.27871	5.7312	0.27871	1.7827	0.71359	-7.1954	0.25576	6.7226	0.71359	-3.3815	0.26153	-4.373	0.73334	-3.3815	0.24904	-4.373	0.74273	8.5054	-5.8091	0.99147	-5.2501	2.7729	6	18	0.34543	5037	196	1.9757	0.13489	13.646	5.8549
-6.5023	0.70999	-6.5023	0.71077	0.34656	0.7074	-3.1208	0.74243	3.6019	0.21894	-0.40546	0.16082	-0.34658	0.69855	6.8489	0.081387	-0.69315	0.0055662	2.7742	0.11319	4.0073	0.11319	0.058877	0.6035	-7.1954	0.71422	6.7226	0.6035	-3.3815	0.087373	-6.0968	0.65895	-3.3815	0.093859	-6.0968	0.66392	6.7815	-5.8091	2.7153	-3.5262	2.7729	6	18	0.54173	211	197	1.9957	0.17237	10.578	5.9744
-6.5023	1.9537	-6.5023	1.9072	0.34656	1.1004	-1.1974	1.5864	-0.28768	1.7956	-7.3008	3.4045	-0.34658	1.096	6.8489	1.4778	-0.69315	0.018016	0.85084	1.9616	7.0131	1.9616	6.9542	1.655	-7.1954	1.9275	0.90975	1.655	-5.3049	3.1302	0.79851	0.012297	-5.3049	3.0843	0.79851	0.055643	7.864	-5.8091	-6.1034	-8.4982	1.1995	0	3	1.958	169	198	0.86025	0.010818	78.523	1.11
-6.5023	1.516	-6.5023	1.4769	0.34656	1.4934	-1.1974	1.5859	-0.28768	1.1614	-5.577	4.9654	-0.34658	1.488	6.8489	0.72313	-0.69315	0.0083912	0.85084	3.6682	5.2893	3.6682	5.2304	1.2481	-7.1954	1.4962	0.90975	1.2481	-5.3049	4.2848	-0.92532	1.2647	-5.3049	4.2917	-0.92532	1.269	6.1401	-5.8091	-4.3795	-6.7744	1.1995	0	2	2.0331	121	199	1.5035	0.031533	46.681	3.3909
-6.5023	2.0995	-6.5023	2.0943	0.34656	1.965	-1.1974	1.4174	-0.28768	1.0868	-3.8531	3.4862	-0.34658	1.9673	6.8489	0.14462	-0.69315	0.0053261	0.85084	2.4352	3.5655	2.4352	3.5066	1.4533	-7.1954	2.091	0.90975	1.4533	-5.3049	2.597	-2.6491	1.3333	-5.3049	2.5906	-2.6491	1.3432	4.4163	-5.8091	-2.6557	-5.0506	1.1995	0	2	2.0249	302	200	1.9138	0.12526	14.278	5.4939
-6.5023	1.3293	-6.5023	1.3088	0.34656	0.8646	-1.1974	1.6059	0.68471	1.3243	-7.3008	2.4754	-0.34658	0.88714	6.8489	1.4267	-0.69315	0.015126	0.85084	1.9056	7.9855	1.9056	6.9542	1.6057	-7.1954	1.319	1.8821	1.6057	-5.3049	3.0005	0.79851	0.01259	-5.3049	2.9603	0.79851	0.054128	8.8364	-5.8091	-6.1034	-8.4982	1.1995	0	3	1.4847	160	201	0.85969	0.0091703	92.748	1.1086
-6.5023	1.6571	-6.5023	1.6513	0.34656	1.4934	-1.1974	1.5524	0.68471	0.89777	-5.577	5.0265	-0.34658	1.503	6.8489	0.75317	-0.69315	0.0089557	0.85084	4.2138	6.2617	4.2138	5.2304	1.1746	-7.1954	1.6619	1.8821	1.1746	-5.3049	4.3564	-0.92532	1.9258	-5.3049	4.3569	-0.92532	1.9178	7.1125	-5.8091	-4.3795	-6.7744	1.1995	0	1	2.0464	136	202	1.5018	0.026291	56.12	3.3829
-6.5023	1.0682	-6.5023	1.0788	0.34656	1.0504	-1.1974	1.2361	0.68471	0.78246	-3.8531	1.8544	-0.34658	1.0474	6.8489	0.092455	-0.69315	0.0059307	0.85084	1.8084	4.5379	1.8084	3.5066	0.26199	-7.1954	1.0737	1.8821	0.26199	-5.3049	1.9161	-2.6491	0.14095	-5.3049	1.9242	-2.6491	0.13085	5.3887	-5.8091	-2.6557	-5.0506	1.1995	0	6	1.1784	18548	203	1.9059	0.10315	17.477	5.4488
-6.5023	0.46755	-6.5023	0.45147	0.34656	1.1004	-1.1974	0.70895	0.68471	1.1216	-2.1293	1.7623	-0.34658	1.1066	6.8489	0.42853	-0.69315	0.010025	0.85084	0.58694	2.814	0.58694	1.7827	0.50861	-7.1954	0.45991	1.8821	0.50861	-5.3049	0.5373	-4.373	1.1658	-5.3049	0.54876	-4.373	1.1841	3.6649	-5.8091	-0.93188	-3.3267	1.1995	3	12	0.93538	1903	204	2.1156	0.38938	4.4333	6.7137
-6.5023	0.94474	-6.5023	0.92133	0.34656	0.86458	-1.1974	1.8147	1.6571	1.2497	-7.3008	1.6488	-0.34658	0.85503	6.8489	1.4353	-0.69315	0.014053	0.85084	2.0663	8.9579	2.0663	6.9542	1.6673	-7.1954	0.93373	2.8545	1.6673	-5.3049	3.2905	0.79851	0.019215	-5.3049	3.2643	0.79851	0.051448	9.8087	-5.8091	-6.1034	-8.4982	1.1995	0	3	1.2406	158	205	0.85948	0.008546	99.571	1.1081
-6.5023	1.3088	-6.5023	1.3287	0.34656	1.965	-1.1974	2.1258	1.6571	0.89532	-5.577	5.0877	-0.34658	1.9766	6.8489	0.77223	-0.69315	0.0088777	0.85084	4.4266	7.2341	4.4266	5.2304	1.6141	-7.1954	1.3187	2.8545	1.6141	-5.3049	4.3688	-0.92532	2.7887	-5.3049	4.3733	-0.92532	2.7882	8.0849	-5.8091	-4.3795	-6.7744	1.1995	0	1	2.1186	117	206	1.5011	0.024301	60.77	3.3799
-6.5023	2.097	-6.5023	2.0872	0.34656	1.9257	-1.1974	1.3164	1.6571	1.1565	-3.8531	3.5473	-0.34658	1.9251	6.8489	0.11895	-0.69315	0.0047382	0.85084	2.4722	5.5102	2.4722	3.5066	1.4581	-7.1954	2.089	2.8545	1.4581	-5.3049	2.6029	-2.6491	1.3478	-5.3049	2.602	-2.6491	1.3388	6.3611	-5.8091	-2.6557	-5.0506	1.1995	0	2	2.0217	198	207	1.9029	0.094674	19.1	5.4318
-6.5023	0.65881	-6.5023	0.62961	0.34656	1.179	-1.1974	0.84394	1.6571	1.1565	-2.1293	1.7012	-0.34658	1.1821	6.8489	0.38754	-0.69315	0.0083725	0.85084	0.56856	3.7864	0.56856	1.7827	0.48656	-7.1954	0.63995	2.8545	0.48656	-5.3049	0.54071	-4.373	1.0005	-5.3049	0.55309	-4.373	1.0309	4.6372	-5.8091	-0.93188	-3.3267	1.1995	2	11	1.0282	1429	208	2.1005	0.35227	4.9628	6.6182
-6.5023	0.39281	-6.5023	0.36493	0.34656	1.179	-1.1974	1.8564	2.6295	1.2659	-7.3008	0.40547	-0.34658	1.1995	6.8489	1.5419	-0.69315	0.0055572	0.85084	2.2312	9.9303	2.2312	6.9542	2.0935	-7.1954	0.37902	3.8269	2.0935	-5.3049	2.5595	0.79851	0.0072314	-5.3049	2.5499	0.79851	0.022035	10.781	-5.8091	-6.1034	-8.4982	1.1995	3	7	0.91075	122	209	0.8594	0.0083098	102.42	1.1079
-6.5023	1.0514	-6.5023	1.0573	0.34656	1.965	-1.1974	3.0708	2.6295	0.74366	-5.577	5.0877	-0.34658	1.9546	6.8489	1.0104	-0.69315	0.0095285	0.85084	5.0632	8.2065	5.0632	5.2304	1.6134	-7.1954	1.0563	3.8269	1.6134	-5.3049	4.3764	-0.92532	3.7175	-5.3049	4.3909	-0.92532	3.6989	9.0573	-5.8091	-4.3795	-6.7744	1.1995	1	2	2.1626	75	210	1.5008	0.023547	62.736	3.3787
-6.5023	0.48763	-6.5023	0.466	0.34656	0.55906	-1.1974	0.96319	2.6295	0.73343	-3.8531	1.3355	-0.34658	0.54655	6.8489	0.24071	-0.69315	0.0094152	0.85084	1.5649	6.4826	1.5649	3.5066	0.59183	-7.1954	0.47646	3.8269	0.59183	-5.3049	1.9094	-2.6491	0.22753	-5.3049	1.898	-2.6491	0.25297	7.3335	-5.8091	-2.6557	-5.0506	1.1995	4	12	0.75746	607	211	1.9018	0.091454	19.795	5.4253
-6.5023	0.29826	-6.5023	0.31835	0.34656	0.55908	-1.1974	0.54565	2.6295	0.69552	-2.1293	1.0887	-0.34658	0.56052	6.8489	0.30259	-0.69315	0.011033	0.85084	0.56084	4.7588	0.56084	1.7827	0.42245	-7.1954	0.30495	3.8269	0.42245	-5.3049	0.4539	-4.373	0.74897	-5.3049	0.44993	-4.373	0.77116	5.6096	-5.8091	-0.93188	-3.3267	1.1995	5	16	0.58425	3038	212	2.0948	0.33791	5.1992	6.582
-6.5023	0.63866	-6.5023	0.64812	0.34656	0.72464	-1.1974	1.188	2.6295	0.518	-0.40546	1.4397	-0.34658	0.77557	6.8489	1.2907	-0.69315	0.052194	0.85084	1.3279	3.0349	1.3279	0.058877	1.1998	-7.1954	0.65137	3.8269	1.1998	-5.3049	0.75322	-6.0968	2.4599	-5.3049	0.71494	-6.0968	2.5704	3.8858	-5.8091	0.79197	-1.6029	1.1995	4	7	0.85951	803	213	2.2832	0.70828	2.2236	7.8194
-6.5023	0.73778	-6.5023	0.73074	0.34656	2.8296	-1.1974	2.4633	3.6019	0.67639	-5.577	5.0265	-0.34658	2.8221	6.8489	1.0278	-0.69315	0.010195	0.85084	5.3672	9.1788	5.3672	5.2304	1.2435	-7.1954	0.72266	4.7993	1.2435	-5.3049	4.3754	-0.92532	3.032	-5.3049	4.3909	-0.92532	3.0161	10.03	-5.8091	-4.3795	-6.7744	1.1995	3	5	2.0774	61	214	1.5007	0.023262	63.514	3.3783
-6.5023	0.62342	-6.5023	0.63991	0.34656	0.786	-1.1974	2.0583	3.6019	0.33085	-3.8531	3.2415	-0.34658	0.77772	6.8489	0.14609	-0.69315	0.0090561	0.85084	2.8495	7.455	2.8495	3.5066	2.4638	-7.1954	0.63163	4.7993	2.4638	-5.3049	2.7018	-2.6491	2.6181	-5.3049	2.7171	-2.6491	2.6016	8.3059	-5.8091	-2.6557	-5.0506	1.1995	3	6	1.28	5	215	1.9014	0.090233	20.072	5.4229
-6.5023	0.36007	-6.5023	0.40547	0.34656	0.15719	-1.1974	0.50596	3.6019	0.33085	-2.1293	0.82508	-0.34658	0.16637	6.8489	0.48407	-0.69315	0.020228	0.85084	0.60465	5.7312	0.60466	1.7827	0.68759	-7.1954	0.38303	4.7993	0.68759	-5.3049	0.19497	-4.373	1.1852	-5.3049	0.18605	-4.373	1.2305	6.582	-5.8091	-0.93188	-3.3267	1.1995	5	15	0.43077	19	216	2.0926	0.33243	5.2947	6.5684
-6.5023	0.40547	-6.5023	0.47853	0.34656	0.60386	-1.1974	0.77315	3.6019	0.29082	-0.40546	1.6214	-0.34658	0.65771	6.8489	1.3286	-0.69315	0.05206	0.85084	1.0351	4.0073	1.0351	0.058877	1.1513	-7.1954	0.42749	4.7993	1.1513	-5.3049	0.69692	-6.0968	2.4526	-5.3049	0.69009	-6.0968	2.5619	4.8582	-5.8091	0.79197	-1.6029	1.1995	4	9	0.69554	506	217	2.272	0.68505	2.3165	7.7428
-6.5023	2.6324	-6.5023	2.5864	0.34656	1.2576	0.72595	1.0672	-0.28768	0.41526	-7.3008	3.5998	-0.34658	1.2405	6.8489	1.5205	-0.69315	0.019946	-1.0725	2.8117	7.0131	2.8117	6.9542	1.6172	-7.1954	2.6097	-1.0136	1.6172	-7.2282	4.4032	0.79851	0.0082967	-7.2282	4.3541	0.79851	0.053049	5.9406	-5.8091	-8.0268	-6.5748	0.2939	1	4	1.9264	259	218	0.86547	0.02607	32.198	1.1236
-6.5023	1.855	-6.5023	1.8201	0.34656	1.1004	0.72595	0.74197	-0.28768	0.33085	-5.577	2.392	-0.34658	1.1183	6.8489	0.87675	-0.69315	0.017128	-1.0725	1.9723	5.2893	1.9723	5.2304	0.99743	-7.1954	1.8373	-1.0136	0.99743	-7.2282	2.9736	-0.92532	0.022185	-7.2282	2.9289	-0.92532	0.065526	4.2168	-5.8091	-6.3029	-4.851	0.2939	2	5	1.3734	145	219	1.5204	0.079616	18.096	3.4672
-6.5023	2.1971	-6.5023	2.1624	0.34656	1.1004	0.72595	1.7544	0.68471	0.74855	-7.3008	3.3292	-0.34658	1.1162	6.8489	1.4742	-0.69315	0.019104	-1.0725	3.4402	7.9855	3.4402	6.9542	1.5661	-7.1954	2.1796	-0.041241	1.5661	-7.2282	4.8601	0.79851	0.0098628	-7.2282	4.8233	0.79851	0.049614	6.913	-5.8091	-8.0268	-6.5748	0.2939	1	4	1.882	184	220	0.86168	0.015013	56.397	1.1137
-6.5023	2.2074	-6.5023	2.1674	0.34656	1.3362	0.72595	1.7544	0.68471	0.74367	-5.577	4.9654	-0.34658	1.3573	6.8489	0.64466	-0.69315	0.0089561	-1.0725	5.0987	6.2617	5.0987	5.2304	1.0711	-7.1954	2.183	-0.041241	1.0711	-7.2282	5.5042	-0.92532	0.2326	-7.2282	5.4851	-0.92532	0.25177	5.1891	-5.8091	-6.3029	-4.851	0.2939	1	5	2.1957	153	221	1.5082	0.044994	32.521	3.4122
-6.5023	2.25	-6.5023	2.2516	0.34656	2.0829	0.72595	2.2269	0.68471	0.70636	-3.8531	3.5473	-0.34658	2.0812	6.8489	0.15938	-0.69315	0.0058173	-1.0725	4.2806	4.5379	4.2806	3.5066	1.3899	-7.1954	2.2573	-0.041241	1.3899	-7.2282	4.4919	-2.6491	1.2301	-7.2282	4.483	-2.6491	1.2358	3.4653	-5.8091	-4.5791	-3.1272	0.2939	1	3	2.1775	496	222	1.936	0.18463	9.4859	5.6223
-6.5023	2.2859	-6.5023	2.2461	0.34656	1.1004	0.72595	1.9779	1.6571	0.96995	-7.3008	3.403	-0.34658	1.1235	6.8489	1.5118	-0.69315	0.018979	-1.0725	3.7091	8.9579	3.7091	6.9542	1.6569	-7.1954	2.2662	0.93113	1.6569	-7.2282	5.3088	0.79851	0.018596	-7.2282	5.2659	0.79851	0.064698	7.8853	-5.8091	-8.0268	-6.5748	0.2939	0	3	1.9972	171	223	0.86024	0.010772	78.862	1.11
-6.5023	1.8402	-6.5023	1.8225	0.34656	1.6506	0.72595	2.3618	1.6571	0.93263	-5.577	4.9654	-0.34658	1.6695	6.8489	0.73016	-0.69315	0.0088178	-1.0725	5.398	7.2341	5.398	5.2304	1.0543	-7.1954	1.833	0.93113	1.0543	-7.2282	6.0314	-0.92532	0.7189	-7.2282	6.0279	-0.92532	0.7224	6.1615	-5.8091	-6.3029	-4.851	0.2939	0	4	2.2622	118	224	1.5036	0.03156	46.643	3.3914
-6.5023	2.1693	-6.5023	2.1677	0.34656	1.965	0.72595	2.3618	1.6571	0.7834	-3.8531	3.4862	-0.34658	1.9598	6.8489	0.16556	-0.69315	0.0050314	-1.0725	4.3203	5.5102	4.3203	3.5066	1.4781	-7.1954	2.1726	0.93113	1.4781	-7.2282	4.5183	-2.6491	1.3496	-7.2282	4.5122	-2.6491	1.3363	4.4377	-5.8091	-4.5791	-3.1272	0.2939	0	2	2.1556	310	225	1.9158	0.12948	13.796	5.5056
-6.5023	1.1546	-6.5023	1.1341	0.34656	0.9432	0.72595	2.5643	2.6295	1.0843	-7.3008	1.9374	-0.34658	0.96726	6.8489	1.4526	-0.69315	0.01522	-1.0725	3.2708	9.9303	3.2708	6.9542	1.5769	-7.1954	1.1462	1.9035	1.5769	-7.2282	4.5856	0.79851	0.008446	-7.2282	4.5641	0.79851	0.048512	8.8577	-5.8091	-8.0268	-6.5748	0.2939	0	3	1.4697	187	226	0.8597	0.009159	92.863	1.1086
-6.5023	1.131	-6.5023	1.1029	0.34656	1.3755	0.72595	3.3405	2.6295	1.3268	-5.577	5.0265	-0.34658	1.3677	6.8489	0.81565	-0.69315	0.01	-1.0725	6.0078	8.2065	6.0078	5.2304	1.1913	-7.1954	1.1112	1.9035	1.1913	-7.2282	6.2812	-0.92532	1.9675	-7.2282	6.278	-0.92532	1.9691	7.1339	-5.8091	-6.3029	-4.851	0.2939	0	1	2.2172	106	227	1.5019	0.02643	55.826	3.3835
-6.5023	1.0141	-6.5023	1.0283	0.34656	1.0004	0.72595	2.1287	2.6295	1.4947	-3.8531	1.8478	-0.34658	0.99312	6.8489	0.097541	-0.69315	0.0059054	-1.0725	3.6371	6.4826	3.6371	3.5066	0.30419	-7.1954	1.0209	1.9035	0.30419	-7.2282	3.7843	-2.6491	0.15649	-7.2282	3.7947	-2.6491	0.14545	5.4101	-5.8091	-4.5791	-3.1272	0.2939	0	6	1.419	18058	228	1.9081	0.10791	16.683	5.4615
-6.5023	0.29756	-6.5023	0.31995	0.34656	0.8646	0.72595	0.87696	2.6295	0.45011	-2.1293	1.5177	-0.34658	0.88562	6.8489	0.59232	-0.69315	0.02057	-1.0725	1.8364	4.7588	1.8364	1.7827	0.51568	-7.1954	0.2997	1.9035	0.51568	-7.2282	1.2719	-4.373	1.1955	-7.2282	1.232	-4.373	1.2361	3.6863	-5.8091	-2.8553	-1.4034	0.2939	3	8	0.72115	2758	229	2.1535	0.48165	3.4711	6.9565
-6.5023	0.91059	-6.5023	0.87882	0.34656	0.94318	0.72595	3.0434	3.6019	1.3479	-7.3008	1.8724	-0.34658	0.92755	6.8489	1.4595	-0.69315	0.013871	-1.0725	3.9225	10.903	3.9225	6.9542	1.6384	-7.1954	0.89458	2.8759	1.6384	-7.2282	4.8522	0.79851	0.011571	-7.2282	4.8171	0.79851	0.045628	9.8301	-5.8091	-8.0268	-6.5748	0.2939	0	3	1.4994	166	230	0.85949	0.008548	99.549	1.1081
-6.5023	1.6593	-6.5023	1.6719	0.34656	2.1222	0.72595	3.7117	3.6019	1.4598	-5.577	5.0877	-0.34658	2.1128	6.8489	0.75836	-0.69315	0.0086503	-1.0725	6.4295	9.1788	6.4295	5.2304	1.6406	-7.1954	1.6617	2.8759	1.6406	-7.2282	6.2939	-0.92532	2.4937	-7.2282	6.2959	-0.92532	2.4793	8.1063	-5.8091	-6.3029	-4.851	0.2939	0	1	2.6188	109	231	1.5012	0.024482	60.319	3.3805
-6.5023	2.2747	-6.5023	2.2778	0.34656	2.0436	0.72595	2.1594	3.6019	0.7137	-3.8531	3.5473	-0.34658	2.0436	6.8489	0.15835	-0.69315	0.0048811	-1.0725	4.2745	7.455	4.2745	3.5066	1.3426	-7.1954	2.2636	2.8759	1.3426	-7.2282	4.5052	-2.6491	1.1498	-7.2282	4.5018	-2.6491	1.1301	6.3825	-5.8091	-4.5791	-3.1272	0.2939	1	3	2.1694	189	232	1.9052	0.099647	18.12	5.4448
-6.5023	0.2787	-6.5023	0.31993	0.34656	0.786	0.72595	1.0119	3.6019	0.41036	-2.1293	1.4565	-0.34658	0.80946	6.8489	0.55579	-0.69315	0.020644	-1.0725	1.8896	5.7312	1.8896	1.7827	0.55486	-7.1954	0.29859	2.8759	0.55486	-7.2282	1.358	-4.373	1.2122	-7.2282	1.3203	-4.373	1.2488	4.6586	-5.8091	-2.8553	-1.4034	0.2939	3	8	0.71058	2242	233	2.139	0.44773	3.7774	6.863
-6.5023	0.53489	-6.5023	0.4927	2.6197	2.0891	-6.9675	2.5981	-0.28768	2.4857	-2.1293	2.1311	1.9266	2.0889	9.122	2.9677	-0.69315	0.011708	8.8941	4.5141	1.8416	4.5141	4.0559	1.5275	-7.1954	0.51357	6.6798	1.5275	0.46522	1.01	-4.373	3.9892	0.46522	1.0409	-4.373	3.9515	10.736	-5.8091	4.8382	-9.0968	7.4632	2	4	1.7219	16	234	0.97791	0.00096822	1009	1.4345
-6.5023	0.74026	-6.5023	0.70789	2.6197	1.7622	-6.9675	4.2049	-0.28768	2.0753	-0.40546	4.425	1.9266	1.7481	9.122	3.3192	-0.69315	0.016864	8.8941	6.5541	0.11778	6.5541	2.332	3.0979	-7.1954	0.72373	6.6798	3.0979	0.46522	3.2178	-6.0968	6.5521	0.46522	3.2582	-6.0968	6.506	9.0119	-5.8091	6.562	-7.373	7.4632	2	4	2.3193	36	235	0.97821	0.0015874	615.24	1.4353
-6.5023	1.0064	-6.5023	0.96614	2.6197	1.8015	-6.9675	3.7606	0.68471	0.93508	-0.40546	4.474	1.9266	1.7924	9.122	3.3998	-0.69315	0.016694	8.8941	5.2513	1.0902	5.2513	2.332	3.0825	-7.1954	0.98445	7.6522	3.0825	0.46522	1.9427	-6.0968	6.5095	0.46522	1.967	-6.0968	6.4797	9.9842	-5.8091	6.562	-7.373	7.4632	0	1	2.1573	21	236	0.97805	0.0011229	870	1.4349
-6.5023	0.523	-6.5023	0.49351	2.6197	2.0373	-6.9675	2.3143	1.6571	1.3243	-0.40546	5.4089	1.9266	2.0313	9.122	3.2457	-0.69315	0.014931	8.8941	4.5614	2.0625	4.5614	2.332	3.2612	-7.1954	0.5081	8.6246	3.2612	0.46522	1.7636	-6.0968	6.4903	0.46522	1.7895	-6.0968	6.4643	10.957	-5.8091	6.562	-7.373	7.4632	2	4	2.0169	10	237	0.97799	0.00094715	1031.6	1.4347
-6.5023	0.40547	-6.5023	0.40547	2.6197	1.4996	-5.0441	0.50646	-0.28768	3.1386	-3.8531	3.4862	1.9266	1.4986	9.122	1.7313	-0.69315	0.0012328	6.9707	1.8025	3.5655	1.8025	5.7797	1.9876	-7.1954	0.40434	4.7565	1.9876	-1.4581	0.10234	-2.6491	3.7199	-1.4581	0.10217	-2.6491	3.7178	10.536	-5.8091	1.191	-8.8973	6.59	3	7	1.5736	7	238	1.6291	0.0027492	591.58	3.9809
-6.5023	0.71346	-6.5023	0.71179	2.6197	1.2576	-5.0441	1.4141	-0.28768	1.9634	-2.1293	1.8847	1.9266	1.2546	9.122	1.1582	-0.69315	0.002311	6.9707	1.1658	1.8416	1.1658	4.0559	1.1236	-7.1954	0.71262	4.7565	1.1236	-1.4581	0.013316	-4.373	1.0367	-1.4581	0.01598	-4.373	1.0401	8.8123	-5.8091	2.9148	-7.1734	6.59	2	6	1.3242	16	239	1.6524	0.0037705	437.24	4.0957
-6.5023	1.0265	-6.5023	1.0104	2.6197	1.421	-5.0441	2.0246	-0.28768	1.2546	-0.40546	0.26731	1.9266	1.4228	9.122	1.5075	-0.69315	0.0059882	6.9707	1.5228	0.11778	1.5228	2.332	1.5401	-7.1954	1.0182	4.7565	1.5401	-1.4581	0.020096	-6.0968	2.066	-1.4581	0.030555	-6.0968	2.0641	7.0885	-5.8091	4.6387	-5.4496	6.59	1	4	1.1674	20	240	1.6543	0.0063906	257.86	4.1051
-6.5023	0.40547	-6.5023	0.40547	2.6197	2.4428	-5.0441	0.50646	0.68471	1.42	-3.8531	3.2415	1.9266	2.4415	9.122	2.1821	-0.69315	0.0011753	6.9707	2.3065	4.5379	2.3065	5.7797	1.1058	-7.1954	0.40436	5.7289	1.1058	-1.4581	0.101	-2.6491	2.7885	-1.4581	0.10322	-2.6491	2.7861	11.509	-5.8091	1.191	-8.8973	6.59	3	7	1.4036	5	241	1.6291	0.0026884	604.95	3.9808
-6.5023	1.0119	-6.5023	1.0126	2.6197	0.94942	-5.0441	1.0122	0.68471	1.7558	-2.1293	1.7929	1.9266	0.95124	9.122	0.61343	-0.69315	0.0010753	6.9707	0.61617	2.814	0.61618	4.0559	0.80207	-7.1954	1.0121	5.7289	0.80207	-1.4581	0.01031	-4.373	0.79325	-1.4581	0.010249	-4.373	0.79372	9.7847	-5.8091	2.9148	-7.1734	6.59	0	6	1.2558	12	242	1.6523	0.0034351	480	4.0952
-6.5023	0.96981	-6.5023	0.96836	2.6197	1.3031	-5.0441	1.4846	0.68471	0.61554	-0.40546	0.21406	1.9266	1.3028	9.122	0.69034	-0.69315	0.00129	6.9707	0.68988	1.0902	0.68988	2.332	1.1739	-7.1954	0.96908	5.7289	1.1739	-1.4581	0.017773	-6.0968	1.3231	-1.4581	0.019258	-6.0968	1.3228	8.0609	-5.8091	4.6387	-5.4496	6.59	2	8	0.92592	20	243	1.6537	0.0045146	365.3	4.1019
-6.5023	0.34349	-6.5023	0.3424	2.6197	1.814	-5.0441	0.6072	1.6571	1.828	-2.1293	1.9764	1.9266	1.8139	9.122	0.51767	-0.69315	0.00089886	6.9707	0.56469	3.7864	0.56469	4.0559	0.49841	-7.1954	0.34295	6.7012	0.49841	-1.4581	0.015415	-4.373	1.6564	-1.4581	0.015929	-4.373	1.655	10.757	-5.8091	2.9148	-7.1734	6.59	3	12	1.1519	12	244	1.6523	0.0033082	498.44	4.0949
-6.5023	0.39716	-6.5023	0.36987	2.6197	1.028	-5.0441	0.43847	1.6571	1.4549	-0.40546	0.22198	1.9266	1.0352	9.122	1.2508	-0.69315	0.0015065	6.9707	1.2464	2.0625	1.2464	2.332	0.93551	-7.1954	0.38099	6.7012	0.93552	-1.4581	0.0094742	-6.0968	0.50843	-1.4581	0.0098892	-6.0968	0.517	9.0333	-5.8091	4.6387	-5.4496	6.59	4	10	0.65174	21	245	1.6534	0.0038042	433.63	4.1008
-6.5023	0.29232	-6.5023	0.27941	2.6197	2.1159	-5.0441	0.43847	2.6295	0.86047	-0.40546	0.26731	1.9266	2.1013	9.122	2.1439	-0.69315	0.0015527	6.9707	2.4419	3.0349	2.4419	2.332	2.2391	-7.1954	0.2954	7.6736	2.2391	-1.4581	0.016094	-6.0968	0.72031	-1.4581	0.017625	-6.0968	0.7234	10.006	-5.8091	4.6387	-5.4496	6.59	4	10	0.70899	15	246	1.6533	0.0035355	466.64	4.1003
-6.5023	0.26286	-6.5023	0.27386	2.6197	1.8926	-5.0441	0.27023	3.6019	1.4785	-0.40546	0.11441	1.9266	1.892	9.122	1.8457	-0.69315	0.0014214	6.9707	1.8863	4.0073	1.8863	2.332	1.9453	-7.1954	0.26911	8.646	1.9453	-1.4581	0.0086698	-6.0968	0.24521	-1.4581	0.0094988	-6.0968	0.24513	10.978	-5.8091	4.6387	-5.4496	6.59	4	10	0.7154	6	247	1.6533	0.0034338	480.48	4.1001
-6.5023	0.23376	-6.5023	0.23186	2.6197	1.814	-3.1208	1.7549	-0.28768	3.2505	-5.577	4.9042	1.9266	1.813	9.122	2.1821	-0.69315	0.0018114	5.0473	4.0413	5.2893	4.0413	7.5035	2.7998	-7.1954	0.23281	2.8331	2.7998	-3.3815	2.4661	-0.92532	4.1177	-3.3815	2.4679	-0.92532	4.118	10.337	-5.8091	-2.4562	-8.6977	4.9884	2	4	2.0315	9	248	1.4907	0.0023798	625.39	3.3331
-6.5023	1.3145	-6.5023	1.312	2.6197	1.2638	-3.1208	0.74243	-0.28768	2.7282	-3.8531	3.425	1.9266	1.2647	9.122	0.77994	-0.69315	0.0023527	5.0473	0.75799	3.5655	0.75798	5.7797	2.2486	-7.1954	1.3134	2.8331	2.2486	-3.3815	0.85636	-2.6491	2.1378	-3.3815	0.851	-2.6491	2.1374	8.6128	-5.8091	-0.73237	-6.9739	4.9884	1	2	1.7977	53	249	1.855	0.0074562	247.79	5.1616
-6.5023	1.2292	-6.5023	1.2282	2.6197	1.5782	-3.1208	1.1474	-0.28768	1.7209	-2.1293	1.8235	1.9266	1.5763	9.122	0.49129	-0.69315	0.0035564	5.0473	0.62179	1.8416	0.62179	4.0559	0.56642	-7.1954	1.2292	2.8331	0.56643	-3.3815	0.089915	-4.373	0.85438	-3.3815	0.095509	-4.373	0.85512	6.889	-5.8091	0.99147	-5.2501	4.9884	0	8	1.4546	213	250	1.9347	0.017638	108.69	5.6148
-6.5023	1.6606	-6.5023	1.6581	2.6197	1.4996	-3.1208	1.8224	-0.28768	0.56447	-0.40546	0.18348	1.9266	1.5072	9.122	0.31958	-0.69315	0.0029745	5.0473	0.50883	0.11778	0.50883	2.332	1.4071	-7.1954	1.658	2.8331	1.4071	-3.3815	0.13254	-6.0968	1.6181	-3.3815	0.14443	-6.0968	1.6199	5.1651	-5.8091	2.7153	-3.5262	4.9884	2	8	1.2314	298	251	1.9471	0.035915	53.214	5.6869
-6.5023	0.52334	-6.5023	0.52528	2.6197	1.6282	-3.1208	1.9328	0.68471	2.0644	-5.577	5.1878	1.9266	1.6278	9.122	0.74253	-0.69315	0.00066787	5.0473	3.2222	6.2617	3.2222	7.5035	3.6378	-7.1954	0.52431	3.8055	3.6378	-3.3815	2.4677	-0.92532	4.6644	-3.3815	2.4686	-0.92532	4.6625	11.309	-5.8091	-2.4562	-8.6977	4.9884	2	5	1.977	31	252	1.4906	0.0022987	647.46	3.333
-6.5023	0.79615	-6.5023	0.80013	2.6197	1.2638	-3.1208	0.67496	0.68471	2.5019	-3.8531	3.425	1.9266	1.2653	9.122	0.45614	-0.69315	0.0016082	5.0473	1.0051	4.5379	1.0051	5.7797	2.3206	-7.1954	0.79822	3.8055	2.3206	-3.3815	0.86366	-2.6491	2.8122	-3.3815	0.86654	-2.6491	2.8131	9.5852	-5.8091	-0.73237	-6.9739	4.9884	1	3	1.577	35	253	1.8549	0.0070921	260.54	5.1609
-6.5023	1.1828	-6.5023	1.1867	2.6197	1.6568	-3.1208	1.0799	0.68471	1.5879	-2.1293	1.8235	1.9266	1.6615	9.122	0.48812	-0.69315	0.0039531	5.0473	0.6949	2.814	0.6949	4.0559	0.56231	-7.1954	1.1852	3.8055	0.56231	-3.3815	0.1036	-4.373	0.83212	-3.3815	0.11393	-4.373	0.82337	7.8614	-5.8091	0.99147	-5.2501	4.9884	0	8	1.4196	176	254	1.9341	0.01569	122.27	5.611
-6.5023	0.90456	-6.5023	0.9144	2.6197	1.7783	-3.1208	2.9207	0.68471	0.71314	-0.40546	1.524	1.9266	1.7741	9.122	0.76716	-0.69315	0.0053483	5.0473	1.0983	1.0902	1.0983	2.332	3.4156	-7.1954	0.90966	3.8055	3.4156	-3.3815	1.906	-6.0968	2.6975	-3.3815	1.8943	-6.0968	2.7084	6.1375	-5.8091	2.7153	-3.5262	4.9884	1	2	1.4592	23378	255	1.9435	0.025146	76.286	5.6656
-6.5023	0.36724	-6.5023	0.37295	2.6197	1.9712	-3.1208	0.53997	1.6571	1.4549	-3.8531	3.5473	1.9266	1.9693	9.122	1.0208	-0.69315	0.0019954	5.0473	1.9358	5.5102	1.9358	5.7797	1.5082	-7.1954	0.36994	4.7779	1.5082	-3.3815	0.88861	-2.6491	3.1801	-3.3815	0.88894	-2.6491	3.1744	10.558	-5.8091	-0.73237	-6.9739	4.9884	3	5	1.3756	25	256	1.8548	0.0069544	265.71	5.1606
-6.5023	0.63182	-6.5023	0.63498	2.6197	1.4996	-3.1208	0.60745	1.6571	1.343	-2.1293	1.7623	1.9266	1.4985	9.122	0.47264	-0.69315	0.0033493	5.0473	0.56247	3.7864	0.56247	4.0559	0.69459	-7.1954	0.62945	4.7779	0.69459	-3.3815	0.10223	-4.373	1.0895	-3.3815	0.10285	-4.373	1.08	8.8337	-5.8091	0.99147	-5.2501	4.9884	3	12	1.0799	139	257	1.9338	0.014953	128.33	5.6096
-6.5023	1.1446	-6.5023	1.1512	2.6197	1.5782	-3.1208	1.2149	1.6571	0.55957	-0.40546	0.16082	1.9266	1.5712	9.122	0.39258	-0.69315	0.0032224	5.0473	0.57671	2.0625	0.57671	2.332	1.4716	-7.1954	1.1448	4.7779	1.4716	-3.3815	0.084427	-6.0968	1.1562	-3.3815	0.093702	-6.0968	1.1612	7.1099	-5.8091	2.7153	-3.5262	4.9884	2	8	0.96822	258	258	1.9421	0.021049	91.264	5.6575
-6.5023	0.45239	-6.5023	0.46492	2.6197	2.0498	-3.1208	0.40498	2.6295	0.81827	-2.1293	1.7623	1.9266	2.0453	9.122	0.98933	-0.69315	0.0042373	5.0473	1.0664	4.7588	1.0664	4.0559	0.60796	-7.1954	0.45856	5.7503	0.60796	-3.3815	0.10829	-4.373	1.2365	-3.3815	0.11674	-4.373	1.232	9.8061	-5.8091	0.99147	-5.2501	4.9884	3	9	0.99212	63	259	1.9337	0.014674	130.78	5.6091
-6.5023	1.099	-6.5023	1.1028	2.6197	1.421	-3.1208	1.0799	2.6295	0.61799	-0.40546	0.16082	1.9266	1.4202	9.122	0.3947	-0.69315	0.0034609	5.0473	0.59384	3.0349	0.59384	2.332	1.386	-7.1954	1.1003	5.7503	1.386	-3.3815	0.069106	-6.0968	0.92481	-3.3815	0.069536	-6.0968	0.92473	8.0823	-5.8091	2.7153	-3.5262	4.9884	2	8	0.91359	218	260	1.9416	0.019496	98.586	5.6545
-6.5023	0.3197	-6.5023	0.30672	2.6197	2.207	-3.1208	0.33749	3.6019	0.33085	-2.1293	1.7012	1.9266	2.2016	9.122	1.7222	-0.69315	0.0057403	5.0473	1.8314	5.7312	1.8314	4.0559	0.512	-7.1954	0.31323	6.7226	0.512	-3.3815	0.10925	-4.373	1.6904	-3.3815	0.12021	-4.373	1.6807	10.779	-5.8091	0.99147	-5.2501	4.9884	4	10	0.86716	25	261	1.9337	0.014569	131.73	5.6089
-6.5023	0.79575	-6.5023	0.80351	2.6197	1.4603	-3.1208	0.80993	3.6019	0.39171	-0.40546	0.20615	1.9266	1.4551	9.122	0.50576	-0.69315	0.0041666	5.0473	0.48433	4.0073	0.48433	2.332	1.3283	-7.1954	0.79969	6.7226	1.3283	-3.3815	0.070133	-6.0968	0.74542	-3.3815	0.073149	-6.0968	0.74962	9.0547	-5.8091	2.7153	-3.5262	4.9884	2	10	0.74456	146	262	1.9414	0.018908	101.67	5.6533
-6.5023	0.92003	-6.5023	0.88051	2.6197	1.33	-1.1974	1.3834	-0.28768	2.1686	-7.3008	1.0126	1.9266	1.326	9.122	3.3164	-0.69315	0.014902	3.124	1.318	7.0131	1.318	9.2274	3.3495	-7.1954	0.89856	0.90975	3.3495	-5.3049	2.2767	0.79851	0.0079817	-5.3049	2.2733	0.79851	0.047978	10.137	-5.8091	-6.1034	-8.4982	3.1576	0	3	1.2825	25	263	0.85745	0.0011214	763.63	1.1028
-6.5023	1.4536	-6.5023	1.4529	2.6197	1.2031	-1.1974	2.9112	-0.28768	2.0872	-5.577	5.2656	1.9266	1.2055	9.122	1.1489	-0.69315	0.0022649	3.124	3.2377	5.2893	3.2377	7.5035	4.3812	-7.1954	1.453	0.90975	4.3812	-5.3049	4.3757	-0.92532	3.8183	-5.3049	4.3693	-0.92532	3.8208	8.4133	-5.8091	-4.3795	-6.7744	3.1576	0	1	2.3956	88	264	1.4946	0.0032851	453.98	3.3509
-6.5023	1.2254	-6.5023	1.228	2.6197	1.4996	-1.1974	1.5186	-0.28768	1.0494	-3.8531	3.5779	1.9266	1.5005	9.122	0.64203	-0.69315	0.0026407	3.124	2.5285	3.5655	2.5285	5.7797	2.1691	-7.1954	1.2269	0.90975	2.1691	-5.3049	2.6282	-2.6491	2.4375	-5.3049	2.6268	-2.6491	2.4323	6.6895	-5.8091	-2.6557	-5.0506	3.1576	0	2	1.6832	92	265	1.8758	0.013405	138.94	5.278
-6.5023	1.2246	-6.5023	1.2248	2.6197	1.3424	-1.1974	0.97893	-0.28768	0.97484	-2.1293	1.8235	1.9266	1.3352	9.122	0.23981	-0.69315	0.0048053	3.124	0.7771	1.8416	0.7771	4.0559	0.5749	-7.1954	1.2279	0.90975	0.5749	-5.3049	0.73889	-4.373	0.53547	-5.3049	0.7365	-4.373	0.52651	4.9656	-5.8091	-0.93188	-3.3267	3.1576	0	8	1.2615	883	266	1.9921	0.057995	33.349	5.9525
-6.5023	0.40547	-6.5023	0.40547	2.6197	0.63503	-1.1974	1.0464	-0.28768	0.52717	-0.40546	0.16082	1.9266	0.63643	9.122	0.31972	-0.69315	0.0049458	3.124	0.444	0.11778	0.44401	2.332	0.61328	-7.1954	0.40395	0.90975	0.61328	-5.3049	0.614	-6.0968	0.46725	-5.3049	0.6183	-6.0968	0.46775	3.2418	-5.8091	0.79197	-1.6029	3.1576	5	17	0.53006	2565	267	2.0573	0.19471	9.5662	6.3489
-6.5023	0.54075	-6.5023	0.539	2.6197	1.4086	-1.1974	1.6014	0.68471	1.532	-7.3008	0.72183	1.9266	1.4043	9.122	2.1185	-0.69315	0.0042274	3.124	1.7023	7.9855	1.7023	9.2274	2.286	-7.1954	0.53986	1.8821	2.286	-5.3049	2.3199	0.79851	0.0062093	-5.3049	2.3114	0.79851	0.016051	11.11	-5.8091	-6.1034	-8.4982	3.1576	3	7	1.0573	13	268	0.8574	0.00094939	902.1	1.1027
-6.5023	0.39374	-6.5023	0.36535	2.6197	1.33	-1.1974	2.1258	0.68471	1.3827	-5.577	2.344	1.9266	1.3109	9.122	2.4813	-0.69315	0.013559	3.124	2.4733	6.2617	2.4733	7.5035	3.5086	-7.1954	0.37944	1.8821	3.5086	-5.3049	4.3038	-0.92532	1.4817	-5.3049	4.2705	-0.92532	1.5149	9.3857	-5.8091	-4.3795	-6.7744	3.1576	2	4	1.3236	13	269	1.4944	0.0027323	545.95	3.3501
-6.5023	1.2302	-6.5023	1.2318	2.6197	1.7354	-1.1974	1.5859	0.68471	0.89289	-3.8531	3.5473	1.9266	1.7313	9.122	0.71893	-0.69315	0.0026509	3.124	2.8838	4.5379	2.8838	5.7797	1.7535	-7.1954	1.2284	1.8821	1.7535	-5.3049	2.6268	-2.6491	2.2474	-5.3049	2.6273	-2.6491	2.2432	7.6618	-5.8091	-2.6557	-5.0506	3.1576	0	2	1.7039	87	270	1.875	0.010947	170.28	5.2734
-6.5023	0.47522	-6.5023	0.46527	2.6197	0.5222	-1.1974	0.96319	0.68471	1.124	-2.1293	1.3129	1.9266	0.52195	9.122	0.18239	-0.69315	0.0093085	3.124	0.73038	2.814	0.73039	4.0559	0.44031	-7.1954	0.47242	1.8821	0.44031	-5.3049	0.70087	-4.373	0.30266	-5.3049	0.69913	-4.373	0.31765	5.938	-5.8091	-0.93188	-3.3267	3.1576	3	15	0.81047	1336	271	1.9877	0.04528	42.899	5.9265
-6.5023	0.37941	-6.5023	0.3796	2.6197	0.5222	-1.1974	1.0973	0.68471	0.59331	-0.40546	0.21902	1.9266	0.51967	9.122	0.3104	-0.69315	0.0051218	3.124	0.55326	1.0902	0.55326	2.332	0.61473	-7.1954	0.38239	1.8821	0.61474	-5.3049	0.73083	-6.0968	0.39713	-5.3049	0.73926	-6.0968	0.39578	4.2142	-5.8091	0.79197	-1.6029	3.1576	5	17	0.53181	1802	272	2.0336	0.12967	14.683	6.203
-6.5023	0.54865	-6.5023	0.55811	2.6197	2.0105	-1.1974	2.4624	1.6571	1.4922	-5.577	4.9348	1.9266	2.0111	9.122	1.3048	-0.69315	0.0018882	3.124	3.3753	7.2341	3.3753	7.5035	3.1899	-7.1954	0.5534	2.8545	3.1899	-5.3049	4.371	-0.92532	3.1368	-5.3049	4.3703	-0.92532	3.1378	10.358	-5.8091	-4.3795	-6.7744	3.1576	2	4	2.0011	12	273	1.4944	0.0025232	591.26	3.3497
-6.5023	0.97053	-6.5023	0.97309	2.6197	1.8533	-1.1974	1.6534	1.6571	0.83937	-3.8531	3.425	1.9266	1.8513	9.122	0.5705	-0.69315	0.0024358	3.124	3.0893	5.5102	3.0893	5.7797	1.5993	-7.1954	0.9708	2.8545	1.5993	-5.3049	2.6345	-2.6491	2.4696	-5.3049	2.6414	-2.6491	2.4641	8.6342	-5.8091	-2.6557	-5.0506	3.1576	0	2	1.6191	68	274	1.8747	0.010016	186.17	5.2716
-6.5023	0.40547	-6.5023	0.3966	2.6197	0.72792	-1.1974	0.93547	1.6571	0.64097	-2.1293	0.66655	1.9266	0.72065	9.122	0.32372	-0.69315	0.0057517	3.124	0.76467	3.7864	0.76467	4.0559	0.47945	-7.1954	0.40102	2.8545	0.47945	-5.3049	0.75927	-4.373	0.21021	-5.3049	0.76151	-4.373	0.21715	6.9104	-5.8091	-0.93188	-3.3267	3.1576	5	13	0.62883	34468	275	1.9861	0.040438	48.114	5.9167
-6.5023	0.39213	-6.5023	0.40331	2.6197	0.71363	-1.1974	1.1814	1.6571	0.52228	-0.40546	0.16082	1.9266	0.70051	9.122	0.28307	-0.69315	0.0044788	3.124	0.44344	2.0625	0.44344	2.332	0.60932	-7.1954	0.39761	2.8545	0.60932	-5.3049	0.61978	-6.0968	0.42643	-5.3049	0.62335	-6.0968	0.42633	5.1865	-5.8091	0.79197	-1.6029	3.1576	5	17	0.56226	1163	276	2.0245	0.10414	18.44	6.1478
-6.5023	0.23373	-6.5023	0.233	2.6197	2.4303	-1.1974	2.7333	2.6295	0.70635	-5.577	0.388	1.9266	2.4163	9.122	2.1035	-0.69315	0.0090456	3.124	1.5793	8.2065	1.5793	7.5035	2.8761	-7.1954	0.23337	3.8269	2.8761	-5.3049	3.0085	-0.92532	0.092328	-5.3049	2.9758	-0.92532	0.12501	11.33	-5.8091	-4.3795	-6.7744	3.1576	4	8	1.1208	5	277	1.4944	0.0024441	610.42	3.3496
-6.5023	0.96753	-6.5023	0.9717	2.6197	1.5782	-1.1974	1.7209	2.6295	0.72746	-3.8531	3.4556	1.9266	1.5767	9.122	0.37068	-0.69315	0.001643	3.124	2.9596	6.4826	2.9596	5.7797	2.0134	-7.1954	0.97021	3.8269	2.0134	-5.3049	2.6576	-2.6491	2.5415	-5.3049	2.6556	-2.6491	2.5396	9.6066	-5.8091	-2.6557	-5.0506	3.1576	1	3	1.5702	46	278	1.8746	0.0096637	192.98	5.2709
-6.5023	0.88224	-6.5023	0.88199	2.6197	1.028	-1.1974	0.70844	2.6295	0.85557	-2.1293	1.7623	1.9266	1.026	9.122	0.22537	-0.69315	0.0040038	3.124	0.94103	4.7588	0.94103	4.0559	0.8108	-7.1954	0.88382	3.8269	0.8108	-5.3049	0.8583	-4.373	0.92027	-5.3049	0.86098	-4.373	0.91189	7.8828	-5.8091	-0.93188	-3.3267	3.1576	1	3	1.0198	392	279	1.9854	0.038601	50.434	5.9129
-6.5023	0.3754	-6.5023	0.37381	2.6197	0.55643	-1.1974	0.97893	2.6295	0.48252	-0.40546	0.20615	1.9266	0.55876	9.122	0.29328	-0.69315	0.004311	3.124	0.38286	3.0349	0.38286	2.332	0.54256	-7.1954	0.3725	3.8269	0.54256	-5.3049	0.55216	-6.0968	0.40167	-5.3049	0.55335	-6.0968	0.4028	6.1589	-5.8091	0.79197	-1.6029	3.1576	5	17	0.49554	1039	280	2.0211	0.094346	20.422	6.127
-6.5023	0.31965	-6.5023	0.31224	2.6197	1.6568	-1.1974	2.4633	3.6019	0.40546	-3.8531	3.4862	1.9266	1.6529	9.122	1.1686	-0.69315	0.0032968	3.124	3.8238	7.455	3.8238	5.7797	1.7017	-7.1954	0.31595	4.7993	1.7017	-5.3049	2.6519	-2.6491	3.2168	-5.3049	2.6584	-2.6491	3.2119	10.579	-5.8091	-2.6557	-5.0506	3.1576	3	5	1.4406	21	281	1.8745	0.0095305	195.69	5.2707
-6.5023	0.45234	-6.5023	0.47522	2.6197	1.028	-1.1974	0.64095	3.6019	0.25624	-2.1293	1.64	1.9266	1.0182	9.122	0.47989	-0.69315	0.0081799	3.124	1.53	5.7312	1.53	4.0559	0.7249	-7.1954	0.46321	4.7993	0.7249	-5.3049	1.0591	-4.373	1.1874	-5.3049	1.0809	-4.373	1.1688	8.8552	-5.8091	-0.93188	-3.3267	3.1576	4	9	0.7488	87	282	1.9852	0.037906	51.371	5.9115
-6.5023	0.28641	-6.5023	0.29627	2.6197	0.30816	-1.1974	0.43897	3.6019	0.21894	-0.40546	0.14499	1.9266	0.31163	9.122	0.2331	-0.69315	0.0042371	3.124	0.16571	4.0073	0.16571	2.332	0.30618	-7.1954	0.28873	4.7993	0.30618	-5.3049	0.34001	-6.0968	0.32823	-5.3049	0.3443	-6.0968	0.33346	7.1313	-5.8091	0.79197	-1.6029	3.1576	6	18	0.28229	412	283	2.0198	0.090622	21.288	6.1191
-6.5023	1.8944	-6.5023	1.8324	2.6197	2.0231	0.72595	3.1166	-0.28768	1.7786	-7.3008	3.5526	1.9266	2.0203	9.122	3.9257	-0.69315	0.02926	1.2006	2.0675	7.0131	2.0675	9.2274	4.105	-7.1954	1.8636	-1.0136	4.105	-7.2282	5.2104	0.79851	0.017224	-7.2282	5.1472	0.79851	0.084003	8.2137	-5.8091	-8.0268	-6.5748	1.4626	0	3	2.3663	219	284	0.85801	0.0027365	312.54	1.1043
-6.5023	1.4262	-6.5023	1.3922	2.6197	1.9587	0.72595	2.1594	-0.28768	1.1614	-5.577	2.8295	1.9266	1.9416	9.122	2.4461	-0.69315	0.01361	1.2006	1.6458	5.2893	1.6458	7.5035	2.9054	-7.1954	1.409	-1.0136	2.9054	-7.2282	4.029	-0.92532	0.033477	-7.2282	3.9873	-0.92532	0.075199	6.4899	-5.8091	-6.3029	-4.851	1.4626	0	3	1.8212	33	285	1.4965	0.0084858	175.35	3.3591
-6.5023	2.5162	-6.5023	2.511	2.6197	1.6175	0.72595	2.0244	-0.28768	0.25624	-3.8531	3.5473	1.9266	1.6246	9.122	0.89283	-0.69315	0.0052977	1.2006	3.4663	3.5655	3.4663	5.7797	1.9511	-7.1954	2.5148	-1.0136	1.9511	-7.2282	4.4582	-2.6491	1.1347	-7.2282	4.4507	-2.6491	1.1382	4.7661	-5.8091	-4.5791	-3.1272	1.4626	1	2	2.0788	106	286	1.8843	0.036785	50.225	5.326
-6.5023	1.5621	-6.5023	1.5603	2.6197	2.0507	0.72595	3.6078	0.68471	1.3522	-7.3008	3.8773	1.9266	2.0369	9.122	3.7274	-0.69315	0.023807	1.2006	3.2157	7.9855	3.2157	9.2274	4.2068	-7.1954	1.5619	-0.041241	4.2068	-7.2282	6.1308	0.79851	0.071459	-7.2282	6.0614	0.79851	0.14083	9.1861	-5.8091	-8.0268	-6.5748	1.4626	0	3	2.3351	112	287	0.85761	0.0015616	548.2	1.1032
-6.5023	1.2268	-6.5023	1.226	2.6197	1.421	0.72595	2.9018	0.68471	0.51983	-5.577	4.9654	1.9266	1.4254	9.122	2.3888	-0.69315	0.012365	1.2006	2.077	6.2617	2.077	7.5035	3.0021	-7.1954	1.2264	-0.041241	3.0021	-7.2282	4.8675	-0.92532	0.091046	-7.2282	4.8342	-0.92532	0.12437	7.4623	-5.8091	-6.3029	-4.851	1.4626	1	4	2.0435	23	288	1.4952	0.0047169	315.99	3.3534
-6.5023	1.7462	-6.5023	1.7409	2.6197	1.421	0.72595	2.7668	0.68471	0.63175	-3.8531	3.5473	1.9266	1.4273	9.122	0.45865	-0.69315	0.002014	1.2006	4.0776	4.5379	4.0776	5.7797	2.167	-7.1954	1.7432	-0.041241	2.167	-7.2282	4.5191	-2.6491	1.7527	-7.2282	4.5127	-2.6491	1.7577	5.7385	-5.8091	-4.5791	-3.1272	1.4626	1	3	1.9757	106	289	1.8787	0.020195	92.025	5.2942
-6.5023	0.7408	-6.5023	0.75027	2.6197	0.77793	0.72595	0.66834	0.68471	0.64192	-2.1293	0.96176	1.9266	0.77195	9.122	0.14912	-0.69315	0.0055399	1.2006	1.5321	2.814	1.5321	4.0559	0.23912	-7.1954	0.74582	-0.041241	0.23912	-7.2282	1.4913	-4.373	0.16829	-7.2282	1.5003	-4.373	0.1729	4.0146	-5.8091	-2.8553	-1.4034	1.4626	3	10	0.75684	42848	290	2.0097	0.10119	18.861	6.0585
-6.5023	1.2586	-6.5023	1.2203	2.6197	1.2183	0.72595	3.4592	1.6571	1.3803	-7.3008	2.4473	1.9266	1.2095	9.122	2.8286	-0.69315	0.0082646	1.2006	2.0343	8.9579	2.0343	9.2274	3.4059	-7.1954	1.2393	0.93113	3.4059	-7.2282	5.081	0.79851	0.016424	-7.2282	5.0559	0.79851	0.047127	10.158	-5.8091	-8.0268	-6.5748	1.4626	0	3	1.8307	22	291	0.85746	0.0011166	766.92	1.1029
-6.5023	1.3169	-6.5023	1.311	2.6197	1.3693	0.72595	3.948	1.6571	0.76475	-5.577	5.1183	1.9266	1.3514	9.122	1.7765	-0.69315	0.0049906	1.2006	4.4975	7.2341	4.4975	7.5035	3.7667	-7.1954	1.3139	0.93113	3.7667	-7.2282	6.2936	-0.92532	2.9396	-7.2282	6.2804	-0.92532	2.9408	8.4347	-5.8091	-6.3029	-4.851	1.4626	0	1	2.3047	24	292	1.4947	0.0032877	453.64	3.3513
-6.5023	1.2252	-6.5023	1.2279	2.6197	1.0673	0.72595	3.3743	1.6571	0.80206	-3.8531	3.5473	1.9266	1.0687	9.122	0.58431	-0.69315	0.0025908	1.2006	4.3359	5.5102	4.3359	5.7797	2.3519	-7.1954	1.2279	0.93113	2.3519	-7.2282	4.5452	-2.6491	2.4007	-7.2282	4.5415	-2.6491	2.4052	6.7108	-5.8091	-4.5791	-3.1272	1.4626	0	2	1.874	88	293	1.8766	0.013861	134.38	5.2822
-6.5023	1.06	-6.5023	1.0594	2.6197	0.94942	0.72595	1.4844	1.6571	0.5969	-2.1293	1.8235	1.9266	0.94613	9.122	0.16948	-0.69315	0.004669	1.2006	2.3965	3.7864	2.3965	4.0559	0.82176	-7.1954	1.0585	0.93113	0.82176	-7.2282	2.5178	-4.373	0.69745	-7.2282	2.5147	-4.373	0.69511	4.987	-5.8091	-2.8553	-1.4034	1.4626	1	5	1.1623	852	294	1.9985	0.069153	27.9	5.9911
-6.5023	0.36606	-6.5023	0.36693	2.6197	0.24203	0.72595	0.67447	1.6571	0.41035	-0.40546	0.20615	1.9266	0.23997	9.122	0.60804	-0.69315	0.0054965	1.2006	0.53387	2.0625	0.53386	2.332	0.22143	-7.1954	0.36905	0.93113	0.22143	-7.2282	1.0869	-6.0968	0.37692	-7.2282	1.0921	-6.0968	0.3828	3.2632	-5.8091	-1.1314	0.32049	1.4626	6	16	0.37767	1450	295	2.1041	0.30242	5.9578	6.6411
-6.5023	0.91284	-6.5023	0.85048	2.6197	2.6733	0.72595	5.9769	2.6295	0.71125	-7.3008	3.0848	1.9266	2.6413	9.122	3.6196	-0.69315	0.021713	1.2006	3.6841	9.9303	3.6841	9.2274	4.5448	-7.1954	0.88117	1.9035	4.5448	-7.2282	7.9982	0.79851	2.3299	-7.2282	7.9293	0.79851	2.3988	11.131	-5.8091	-8.0268	-6.5748	1.4626	1	2	2.3683	39	296	0.85741	0.00094821	903.24	1.1027
-6.5023	0.51166	-6.5023	0.49559	2.6197	1.4996	0.72595	4.2937	2.6295	0.66905	-5.577	5.1183	1.9266	1.5037	9.122	1.9682	-0.69315	0.0065714	1.2006	4.297	8.2065	4.297	7.5035	3.8638	-7.1954	0.50355	1.9035	3.8638	-7.2282	6.2665	-0.92532	2.6067	-7.2282	6.2535	-0.92532	2.6199	9.4071	-5.8091	-6.3029	-4.851	1.4626	3	5	2.098	10	297	1.4945	0.0027467	543.12	3.3505
-6.5023	1.0582	-6.5023	1.0575	2.6197	1.4996	0.72595	3.5093	2.6295	0.86047	-3.8531	3.4862	1.9266	1.5001	9.122	0.56179	-0.69315	0.0025188	1.2006	4.4213	6.4826	4.4213	5.7797	2.0591	-7.1954	1.0564	1.9035	2.0591	-7.2282	4.5452	-2.6491	2.2831	-7.2282	4.5447	-2.6491	2.2916	7.6832	-5.8091	-4.5791	-3.1272	1.4626	0	2	1.9119	82	298	1.8757	0.011457	162.72	5.2776
-6.5023	0.40547	-6.5023	0.39389	2.6197	0.42781	0.72595	1.3556	2.6295	1.1148	-2.1293	0.71522	1.9266	0.42647	9.122	0.1235	-0.69315	0.0056831	1.2006	1.9936	4.7588	1.9936	4.0559	0.25774	-7.1954	0.39963	1.9035	0.25774	-7.2282	2.0231	-4.373	0.18759	-7.2282	2.0325	-4.373	0.19111	5.9594	-5.8091	-2.8553	-1.4034	1.4626	4	12	0.73546	35770	299	1.9943	0.056819	34.099	5.9657
-6.5023	0.31979	-6.5023	0.31974	2.6197	0.24203	0.72595	0.67447	2.6295	0.48252	-0.40546	0.16082	1.9266	0.23358	9.122	0.57486	-0.69315	0.0048799	1.2006	0.50206	3.0349	0.50206	2.332	0.21993	-7.1954	0.31941	1.9035	0.21994	-7.2282	1.0679	-6.0968	0.37748	-7.2282	1.0734	-6.0968	0.37773	4.2356	-5.8091	-1.1314	0.32049	1.4626	6	16	0.36656	996	300	2.0814	0.24365	7.5427	6.4983
-6.5023	0.31875	-6.5023	0.3196	2.6197	1.5782	0.72595	4.0492	3.6019	0.751	-5.577	1.1901	1.9266	1.5791	9.122	2.3393	-0.69315	0.01056	1.2006	2.2119	9.1788	2.2119	7.5035	2.7388	-7.1954	0.31917	2.8759	2.7388	-7.2282	4.5618	-0.92532	0.054435	-7.2282	4.5406	-0.92532	0.075668	10.379	-5.8091	-6.3029	-4.851	1.4626	2	6	1.3678	7	301	1.4945	0.002542	586.91	3.3502
-6.5023	0.35896	-6.5023	0.36708	2.6197	2.1784	0.72595	2.3005	3.6019	3.3454	-3.8531	1.0266	1.9266	2.1738	9.122	1.7163	-0.69315	0.0041862	1.2006	4.239	7.455	4.239	5.7797	1.6302	-7.1954	0.36305	2.8759	1.6302	-7.2282	3.266	-2.6491	0.063259	-7.2282	3.274	-2.6491	0.064824	8.6556	-5.8091	-4.5791	-3.1272	1.4626	2	6	1.5962	4698	302	1.8754	0.010546	176.83	5.2759
-6.5023	1.1368	-6.5023	1.1369	2.6197	0.87082	0.72595	1.4169	3.6019	0.60178	-2.1293	1.8235	1.9266	0.88238	9.122	0.17414	-0.69315	0.0041395	1.2006	2.3507	5.7312	2.3507	4.0559	0.80263	-7.1954	1.1404	2.8759	0.80263	-7.2282	2.5165	-4.373	0.63607	-7.2282	2.5121	-4.373	0.63173	6.9318	-5.8091	-2.8553	-1.4034	1.4626	1	5	1.1644	583	303	1.9927	0.052122	37.231	5.9561
-6.5023	0.31971	-6.5023	0.31971	2.6197	0.22957	0.72595	0.60698	3.6019	0.37795	-0.40546	0.20615	1.9266	0.23368	9.122	0.54269	-0.69315	0.0040831	1.2006	0.53877	4.0073	0.53877	2.332	0.21497	-7.1954	0.31825	2.8759	0.21497	-7.2282	1.0046	-6.0968	0.38962	-7.2282	1.0055	-6.0968	0.39303	5.2079	-5.8091	-1.1314	0.32049	1.4626	6	16	0.34334	885	304	2.0727	0.22064	8.3943	6.4443
-6.5023	1.1315	-6.5023	1.0971	4.8928	3.3709	-6.9675	3.1138	-0.28768	3.0843	-0.40546	2.3851	4.1997	3.3567	11.395	4.6018	-0.69315	0.014311	11.167	5.9246	0.11778	5.9246	4.6052	0.42384	-7.1954	1.1113	6.6798	0.42384	0.46522	1.308	-6.0968	5.0404	0.46522	1.3371	-6.0968	5.0069	11.285	-5.8091	6.562	-7.373	9.7358	0	3	2.3638	4	305	0.97773	0.00016365	5973.4	1.4339
-6.5023	0.58239	-6.5023	0.58202	4.8928	0.3537	-5.0441	0.57346	-0.28768	2.7468	-2.1293	2.0681	4.1997	0.35362	11.395	0.68745	-0.69315	0.00018615	9.2438	0.6787	1.8416	0.6787	6.329	2.1734	-7.1954	0.58221	4.7565	2.1734	-1.4581	0.0089379	-4.373	1.4857	-1.4581	0.0085656	-4.373	1.4861	11.085	-5.8091	2.9148	-7.1734	8.8619	4	12	1.1511	2	306	1.6513	0.00038892	4244.9	4.0901
-6.5023	0.28347	-6.5023	0.28137	4.8928	1.6381	-5.0441	0.30348	-0.28768	1.7956	-0.40546	0.14499	4.1997	1.6371	11.395	1.9195	-0.69315	0.0010475	9.2438	1.9405	0.11778	1.9405	4.6052	1.4921	-7.1954	0.28242	4.7565	1.4921	-1.4581	0.020008	-6.0968	0.42846	-1.4581	0.022104	-6.0968	0.42636	9.3616	-5.8091	4.6387	-5.4496	8.8619	4	10	0.74116	1	307	1.6524	0.00065981	2503.3	4.0955
-6.5023	0.40511	-6.5023	0.40547	4.8928	0.44483	-5.0441	0.39602	0.68471	2.3255	-0.40546	0.13302	4.1997	0.44464	11.395	2.1254	-0.69315	0.0011662	9.2438	2.1392	1.0902	2.1392	4.6052	0.53874	-7.1954	0.40529	5.7289	0.53874	-1.4581	0.014077	-6.0968	0.65488	-1.4581	0.017627	-6.0968	0.65524	10.334	-5.8091	4.6387	-5.4496	8.8619	5	14	0.685	13	308	1.6523	0.00046579	3546.4	4.0952
-6.5023	1.0165	-6.5023	1.015	4.8928	0.28043	-5.0441	1.0214	1.6571	1.3057	-0.40546	0.17835	4.1997	0.28054	11.395	1.46	-0.69315	0.00065708	9.2438	1.4656	2.0625	1.4656	4.6052	0.37524	-7.1954	1.0158	6.7012	0.37524	-1.4581	0.015793	-6.0968	1.117	-1.4581	0.015784	-6.0968	1.1156	11.306	-5.8091	4.6387	-5.4496	8.8619	2	8	0.8029	6	309	1.6523	0.0003924	4209.7	4.0951
-6.5023	0.49708	-6.5023	0.4961	4.8928	0.3537	-3.1208	0.37123	-0.28768	3.2505	-3.8531	3.5168	4.1997	0.35339	11.395	0.60153	-0.69315	0.00048833	7.3205	0.38714	3.5655	0.38714	8.0528	3.6217	-7.1954	0.49659	2.8331	3.6217	-3.3815	0.86831	-2.6491	3.0197	-3.3815	0.86733	-2.6491	3.0207	10.886	-5.8091	-0.73237	-6.9739	7.2554	4	10	1.4142	2	310	1.8528	0.00076974	2406.1	5.1493
-6.5023	0.92828	-6.5023	0.92516	4.8928	0.40547	-3.1208	0.87743	-0.28768	2.6909	-2.1293	1.6706	4.1997	0.40901	11.395	1.0234	-0.69315	0.0015219	7.3205	0.95913	1.8416	0.95913	6.329	2.0017	-7.1954	0.92672	2.8331	2.0017	-3.3815	0.081266	-4.373	0.89522	-3.3815	0.078553	-4.373	0.89835	9.1621	-5.8091	0.99147	-5.2501	7.2554	1	5	1.2496	32	311	1.9294	0.0018274	1054.9	5.5841
-6.5023	0.66966	-6.5023	0.66774	4.8928	0.24827	-3.1208	0.74243	-0.28768	1.3292	-0.40546	0.22198	4.1997	0.24872	11.395	1.1055	-0.69315	0.0018255	7.3205	1.1326	0.11778	1.1326	4.6052	0.30362	-7.1954	0.6687	2.8331	0.30362	-3.3815	0.055321	-6.0968	0.48053	-3.3815	0.057691	-6.0968	0.47816	7.4383	-5.8091	2.7153	-3.5262	7.2554	5	14	0.64655	30	312	1.9363	0.0037437	516.21	5.6237
-6.5023	0.30234	-6.5023	0.30037	4.8928	0.3144	-3.1208	0.23623	0.68471	2.4086	-2.1293	1.7318	4.1997	0.31555	11.395	0.81539	-0.69315	0.0013773	7.3205	0.67688	2.814	0.67688	6.329	2.0027	-7.1954	0.30135	3.8055	2.0027	-3.3815	0.066076	-4.373	1.4906	-3.3815	0.068388	-4.373	1.4934	10.134	-5.8091	0.99147	-5.2501	7.2554	4	11	0.88229	6	313	1.9294	0.0016246	1186.6	5.5837
-6.5023	0.79963	-6.5023	0.79638	4.8928	0.35545	-3.1208	0.81607	0.68471	1.5184	-0.40546	0.17194	4.1997	0.3586	11.395	1.4415	-0.69315	0.0028355	7.3205	1.5212	1.0902	1.5212	4.6052	0.4144	-7.1954	0.798	3.8055	0.41441	-3.3815	0.073769	-6.0968	0.74003	-3.3815	0.077885	-6.0968	0.73379	8.4106	-5.8091	2.7153	-3.5262	7.2554	2	10	0.74298	277	314	1.9359	0.002612	740.15	5.6215
-6.5023	0.40484	-6.5023	0.40547	4.8928	0.61632	-3.1208	0.53997	1.6571	1.7161	-2.1293	1.64	4.1997	0.61601	11.395	0.21086	-0.69315	0.00031485	7.3205	0.076037	3.7864	0.076038	6.329	2.256	-7.1954	0.40515	4.7779	2.256	-3.3815	0.13513	-4.373	2.0449	-3.3815	0.1345	-4.373	2.0455	11.107	-5.8091	0.99147	-5.2501	7.2554	4	12	0.88711	1	315	1.9294	0.0015479	1245.4	5.5836
-6.5023	0.30552	-6.5023	0.30007	4.8928	0.32687	-3.1208	0.33748	1.6571	1.4549	-0.40546	0.22198	4.1997	0.32834	11.395	1.2517	-0.69315	0.0021473	7.3205	1.2718	2.0625	1.2718	4.6052	0.47884	-7.1954	0.30272	4.7779	0.47884	-3.3815	0.066062	-6.0968	0.47472	-3.3815	0.068008	-6.0968	0.47136	9.383	-5.8091	2.7153	-3.5262	7.2554	5	14	0.49114	24	316	1.9357	0.0021838	885.42	5.6207
-6.5023	0.17411	-6.5023	0.17116	4.8928	1.1665	-3.1208	0.16873	2.6295	1.154	-0.40546	0.14499	4.1997	1.164	11.395	1.2331	-0.69315	0.0024912	7.3205	1.299	3.0349	1.299	4.6052	1.019	-7.1954	0.17266	5.7503	1.019	-3.3815	0.059995	-6.0968	0.30242	-3.3815	0.057902	-6.0968	0.29738	10.355	-5.8091	2.7153	-3.5262	7.2554	4	10	0.49659	6	317	1.9357	0.0020218	956.42	5.6204
-6.5023	0.40547	-6.5023	0.40486	4.8928	0.14472	-3.1208	0.33749	3.6019	0.15412	-0.40546	0.038495	4.1997	0.14487	11.395	0.26045	-0.69315	0.00014682	7.3205	0.19262	4.0073	0.19261	4.6052	0.18336	-7.1954	0.40516	6.7226	0.18337	-3.3815	0.06701	-6.0968	0.35809	-3.3815	0.06762	-6.0968	0.3578	11.328	-5.8091	2.7153	-3.5262	7.2554	6	18	0.24752	3	318	1.9357	0.0019605	986.33	5.6202
-6.5023	0.96875	-6.5023	0.96844	4.8928	0.091072	-1.1974	3.4082	-0.28768	1.8329	-5.577	5.3323	4.1997	0.091228	11.395	0.87736	-0.69315	0.00015563	5.3971	3.4995	5.2893	3.4995	9.7767	5.2411	-7.1954	0.96859	0.90975	5.2411	-5.3049	4.377	-0.92532	4.3636	-5.3049	4.3767	-0.92532	4.3639	10.686	-5.8091	-4.3795	-6.7744	5.3918	1	3	2.1003	1	319	1.4937	0.00033873	4408.7	3.3468
-6.5023	1.4885	-6.5023	1.4827	4.8928	0.53772	-1.1974	1.1809	-0.28768	2.9147	-3.8531	3.4862	4.1997	0.53484	11.395	2.0637	-0.69315	0.0029712	5.3971	0.5103	3.5655	0.5103	8.0528	4.021	-7.1954	1.4856	0.90975	4.021	-5.3049	2.6485	-2.6491	1.9977	-5.3049	2.6404	-2.6491	2.0035	8.9626	-5.8091	-2.6557	-5.0506	5.3918	1	5	1.8484	7	320	1.8719	0.0013861	1349.4	5.2558
-6.5023	0.3465	-6.5023	0.34307	4.8928	0.40547	-1.1974	0.70844	-0.28768	1.8702	-2.1293	1.7012	4.1997	0.40518	11.395	1.0045	-0.69315	0.0037416	5.3971	0.44053	1.8416	0.44053	6.329	2.0173	-7.1954	0.34469	0.90975	2.0173	-5.3049	0.8571	-4.373	1.4	-5.3049	0.84576	-4.373	1.4146	7.2388	-5.8091	-0.93188	-3.3267	5.3918	4	9	0.8958	62	321	1.9745	0.0060807	323.72	5.8481
-6.5023	0.31583	-6.5023	0.31968	4.8928	0.30192	-1.1974	0.91143	-0.28768	0.97484	-0.40546	0.14499	4.1997	0.29645	11.395	0.40351	-0.69315	0.0025266	5.3971	0.84092	0.11778	0.84092	4.6052	0.29176	-7.1954	0.31773	0.90975	0.29176	-5.3049	0.56929	-6.0968	0.32031	-5.3049	0.57445	-6.0968	0.32164	5.5149	-5.8091	0.79197	-1.6029	5.3918	4	14	0.49478	508	322	1.9959	0.021388	92.32	5.9755
-6.5023	0.66046	-6.5023	0.66007	4.8928	0.44483	-1.1974	2.0093	0.68471	2.3255	-3.8531	3.5612	4.1997	0.44323	11.395	1.489	-0.69315	0.0015394	5.3971	1.1835	4.5379	1.1835	8.0528	3.9618	-7.1954	0.66027	1.8821	3.9618	-5.3049	2.6406	-2.6491	2.998	-5.3049	2.6377	-2.6491	2.9985	9.935	-5.8091	-2.6557	-5.0506	5.3918	3	6	1.6102	48	323	1.8718	0.001131	1654	5.2553
-6.5023	0.80208	-6.5023	0.79631	4.8928	0.30192	-1.1974	0.23648	0.68471	1.7558	-2.1293	1.8235	4.1997	0.29747	11.395	0.87257	-0.69315	0.0029046	5.3971	0.22734	2.814	0.22733	6.329	1.6613	-7.1954	0.79907	1.8821	1.6613	-5.3049	0.82855	-4.373	1.0228	-5.3049	0.82459	-4.373	1.0273	8.2111	-5.8091	-0.93188	-3.3267	5.3918	2	6	0.95268	76	324	1.9741	0.0047274	416.57	5.8454
-6.5023	0.29503	-6.5023	0.28144	4.8928	0.24827	-1.1974	0.84344	0.68471	0.93508	-0.40546	0.16082	4.1997	0.25255	11.395	0.39288	-0.69315	0.0042778	5.3971	0.90026	1.0902	0.90026	4.6052	0.19766	-7.1954	0.28837	1.8821	0.19766	-5.3049	0.53845	-6.0968	0.29479	-5.3049	0.54182	-6.0968	0.29518	6.4873	-5.8091	0.79197	-1.6029	5.3918	4	14	0.46068	354	325	1.9934	0.013931	142.1	5.9605
-6.5023	0.25745	-6.5023	0.25768	4.8928	0.47159	-1.1974	2.8683	1.6571	1.1005	-3.8531	3.7308	4.1997	0.47148	11.395	0.26106	-0.69315	0.00015745	5.3971	2.5997	5.5102	2.5997	8.0528	3.8755	-7.1954	0.25756	2.8545	3.8755	-5.3049	2.6651	-2.6491	3.9214	-5.3049	2.6653	-2.6491	3.9215	10.907	-5.8091	-2.6557	-5.0506	5.3918	3	7	1.4477	4	326	1.8717	0.0010344	1808.4	5.2551
-6.5023	0.46463	-6.5023	0.45291	4.8928	0.38052	-1.1974	0.64095	1.6571	1.828	-2.1293	1.7623	4.1997	0.37795	11.395	0.98044	-0.69315	0.0027472	5.3971	0.43868	3.7864	0.43869	6.329	1.984	-7.1954	0.45843	2.8545	1.984	-5.3049	0.8242	-4.373	1.1783	-5.3049	0.81505	-4.373	1.1874	9.1835	-5.8091	-0.93188	-3.3267	5.3918	4	9	0.92156	40	327	1.9739	0.0042153	467.27	5.8444
-6.5023	0.30206	-6.5023	0.31545	4.8928	0.22333	-1.1974	0.77594	1.6571	1.0819	-0.40546	0.20615	4.1997	0.22386	11.395	0.33467	-0.69315	0.0035015	5.3971	0.85989	2.0625	0.85989	4.6052	0.21319	-7.1954	0.31094	2.8545	0.21319	-5.3049	0.6154	-6.0968	0.29832	-5.3049	0.62364	-6.0968	0.29696	7.4597	-5.8091	0.79197	-1.6029	5.3918	4	14	0.48413	267	328	1.9925	0.011099	178.52	5.9548
-6.5023	0.30766	-6.5023	0.3049	4.8928	0.25541	-1.1974	0.76367	2.6295	1.0455	-2.1293	1.6623	4.1997	0.25688	11.395	0.43185	-0.69315	0.0012513	5.3971	0.57785	4.7588	0.57784	6.329	1.6802	-7.1954	0.30619	3.8269	1.6802	-5.3049	0.963	-4.373	1.5018	-5.3049	0.95952	-4.373	1.5058	10.156	-5.8091	-0.93188	-3.3267	5.3918	3	9	0.72323	135	329	1.9738	0.0040215	489.82	5.844
-6.5023	0.31898	-6.5023	0.31965	4.8928	0.24827	-1.1974	0.84394	2.6295	0.85557	-0.40546	0.14499	4.1997	0.25094	11.395	0.44829	-0.69315	0.0025884	5.3971	0.72901	3.0349	0.72902	4.6052	0.31719	-7.1954	0.31802	3.8269	0.31719	-5.3049	0.46262	-6.0968	0.36269	-5.3049	0.46632	-6.0968	0.35567	8.4321	-5.8091	0.79197	-1.6029	5.3918	4	16	0.45523	238	330	1.9921	0.010027	197.68	5.9527
-6.5023	0.32351	-6.5023	0.32223	4.8928	0.25541	-1.1974	1.4079	3.6019	0.14433	-2.1293	1.5455	4.1997	0.25497	11.395	0.54801	-0.69315	0.00050078	5.3971	1.4486	5.7312	1.4486	6.329	1.5523	-7.1954	0.32287	4.7993	1.5523	-5.3049	1.0298	-4.373	1.9315	-5.3049	1.0315	-4.373	1.9306	11.128	-5.8091	-0.93188	-3.3267	5.3918	4	8	0.66648	12	331	1.9738	0.0039482	498.92	5.8439
-6.5023	0.23215	-6.5023	0.23374	4.8928	0.22333	-1.1974	0.37097	3.6019	0.30334	-0.40546	0.099656	4.1997	0.22475	11.395	0.31756	-0.69315	0.00080018	5.3971	0.2685	4.0073	0.2685	4.6052	0.1562	-7.1954	0.23235	4.7993	0.1562	-5.3049	0.28611	-6.0968	0.19523	-5.3049	0.28394	-6.0968	0.1982	9.4045	-5.8091	0.79197	-1.6029	5.3918	6	18	0.24386	67	332	1.992	0.0096207	206.05	5.9519
-6.5023	0.46858	-6.5023	0.45205	4.8928	3.6817	0.72595	0.89215	-0.28768	3.5862	-7.3008	0.46692	4.1997	3.6735	11.395	4.1337	-0.69315	0.0082039	3.4737	3.1193	7.0131	3.1193	11.501	4.1404	-7.1954	0.46026	-1.0136	4.1404	-7.2282	1.0228	0.79851	0.001662	-7.2282	1.0062	0.79851	0.015303	10.487	-5.8091	-8.0268	-6.5748	3.5029	3	7	1.5913	2	333	0.85723	0.00028239	3034.6	1.1023
-6.5023	0.48861	-6.5023	0.4502	4.8928	4.5463	0.72595	3.3068	-0.28768	2.1313	-5.577	1.1274	4.1997	4.5273	11.395	4.8763	-0.69315	0.015106	3.4737	1.6255	5.2893	1.6254	9.7767	5.0277	-7.1954	0.46922	-1.0136	5.0277	-7.2282	4.691	-0.92532	0.060554	-7.2282	4.6605	-0.92532	0.090998	8.763	-5.8091	-6.3029	-4.851	3.5029	2	6	2.0084	5	334	1.494	0.0008771	1702.3	3.348
-6.5023	0.97593	-6.5023	0.96733	4.8928	1.0486	0.72595	3.5768	-0.28768	0.95618	-3.8531	3.4556	4.1997	1.0474	11.395	2.0845	-0.69315	0.0031557	3.4737	2.4502	3.5655	2.4502	8.0528	4.5799	-7.1954	0.97161	-1.0136	4.5799	-7.2282	4.5703	-2.6491	2.6326	-7.2282	4.5618	-2.6491	2.6412	7.0392	-5.8091	-4.5791	-3.1272	3.5029	0	1	1.8301	22	335	1.8733	0.0038368	487.23	5.2637
-6.5023	0.71725	-6.5023	0.71001	4.8928	0.40547	0.72595	1.9231	-0.28768	0.36816	-2.1293	1.8235	4.1997	0.40827	11.395	1.1408	-0.69315	0.0050488	3.4737	1.4889	1.8416	1.4889	6.329	2.2381	-7.1954	0.71368	-1.0136	2.2381	-7.2282	2.5865	-4.373	1.0579	-7.2282	2.5751	-4.373	1.0645	5.3154	-5.8091	-2.8553	-1.4034	3.5029	4	7	0.99125	248	336	1.9818	0.019932	98.427	5.8915
-6.5023	0.31295	-6.5023	0.31964	4.8928	0.24827	0.72595	0.337	-0.28768	0.25624	-0.40546	0.16082	4.1997	0.24776	11.395	0.46506	-0.69315	0.0022413	3.4737	0.24834	0.11778	0.24835	4.6052	0.30285	-7.1954	0.3163	-1.0136	0.30286	-7.2282	0.52938	-6.0968	0.34182	-7.2282	0.52645	-6.0968	0.34159	3.5915	-5.8091	-1.1314	0.32049	3.5029	6	18	0.27249	968	337	2.0301	0.10168	18.965	6.1818
-6.5023	0.29045	-6.5023	0.29623	4.8928	4.1962	0.72595	3.4321	0.68471	1.281	-7.3008	0.40547	4.1997	4.1932	11.395	3.8999	-0.69315	0.0029232	3.4737	1.5647	7.9855	1.5647	11.501	3.9096	-7.1954	0.29335	-0.041241	3.9096	-7.2282	4.0474	0.79851	0.0067918	-7.2282	4.0416	0.79851	0.012576	11.459	-5.8091	-8.0268	-6.5748	3.5029	3	7	1.6502	7	338	0.85719	0.00016099	5323.5	1.1022
-6.5023	1.3435	-6.5023	1.3264	4.8928	2.5813	0.72595	4.2855	0.68471	2.1288	-5.577	3.8424	4.1997	2.5719	11.395	3.5881	-0.69315	0.0093814	3.4737	2.3987	6.2617	2.3987	9.7767	6.4143	-7.1954	1.3349	-0.041241	6.4143	-7.2282	5.3112	-0.92532	2.8166	-7.2282	5.2923	-0.92532	2.8356	9.7354	-5.8091	-6.3029	-4.851	3.5029	0	1	2.5847	2	339	1.4939	0.00048669	3068.4	3.3474
-6.5023	0.28826	-6.5023	0.28105	4.8928	0.93072	0.72595	4.2517	0.68471	0.93508	-3.8531	3.4862	4.1997	0.92624	11.395	2.0566	-0.69315	0.0028405	3.4737	2.4899	4.5379	2.4899	8.0528	4.4124	-7.1954	0.28464	-0.041241	4.4124	-7.2282	4.555	-2.6491	3.276	-7.2282	4.5452	-2.6491	3.2792	8.0116	-5.8091	-4.5791	-3.1272	3.5029	2	4	1.6955	9	340	1.8727	0.0020934	893.57	5.2604
-6.5023	0.36752	-6.5023	0.36573	4.8928	0.40547	0.72595	2.4968	0.68471	0.45011	-2.1293	1.7623	4.1997	0.4046	11.395	0.85412	-0.69315	0.0024002	3.4737	1.9629	2.814	1.9629	6.329	1.9841	-7.1954	0.36744	-0.041241	1.9841	-7.2282	2.6555	-4.373	1.5177	-7.2282	2.6497	-4.373	1.5185	6.2878	-5.8091	-2.8553	-1.4034	3.5029	4	7	0.97467	175	341	1.9787	0.010754	183	5.8732
-6.5023	0.2832	-6.5023	0.28635	4.8928	0.30192	0.72595	0.80946	0.68471	0.55714	-0.40546	0.16082	4.1997	0.30291	11.395	0.44444	-0.69315	0.0025457	3.4737	0.64335	1.0902	0.64335	4.6052	0.31244	-7.1954	0.28493	-0.041241	0.31244	-7.2282	0.90558	-6.0968	0.30031	-7.2282	0.90745	-6.0968	0.30061	4.5639	-5.8091	-1.1314	0.32049	3.5029	5	15	0.39981	1016	342	2.0131	0.053089	36.919	6.0789
-6.5023	3.2902	-6.5023	3.2854	4.8928	0.091072	0.72595	2.9693	1.6571	1.9026	-5.577	4.9654	4.1997	0.093482	11.395	3.1943	-0.69315	0.0024103	3.4737	3.0628	7.2341	3.0628	9.7767	4.8719	-7.1954	3.2878	0.93113	4.8719	-7.2282	6.2595	-0.92532	1.6752	-7.2282	6.2547	-0.92532	1.68	10.708	-5.8091	-6.3029	-4.851	3.5029	1	3	2.7506	1	343	1.4938	0.000339	4405.5	3.3472
-6.5023	0.85216	-6.5023	0.85009	4.8928	0.99503	0.72595	3.7394	1.6571	1.1989	-3.8531	3.4639	4.1997	0.99384	11.395	2.1029	-0.69315	0.0035262	3.4737	2.4426	5.5102	2.4426	8.0528	4.2481	-7.1954	0.85172	0.93113	4.2481	-7.2282	4.5505	-2.6491	2.7048	-7.2282	4.541	-2.6491	2.7062	8.984	-5.8091	-4.5791	-3.1272	3.5029	0	1	1.8499	76	344	1.8725	0.0014334	1305.3	5.2592
-6.5023	0.39612	-6.5023	0.40276	4.8928	0.40547	0.72595	2.4293	1.6571	0.67151	-2.1293	1.7012	4.1997	0.41019	11.395	0.90499	-0.69315	0.002487	3.4737	2.0742	3.7864	2.0742	6.329	2.0917	-7.1954	0.4008	0.93113	2.0917	-7.2282	2.6567	-4.373	1.3672	-7.2282	2.6557	-4.373	1.3709	7.2601	-5.8091	-2.8553	-1.4034	3.5029	4	7	1.0011	79	345	1.9776	0.0072655	271.19	5.8662
-6.5023	0.28075	-6.5023	0.28083	4.8928	0.32687	0.72595	1.0119	1.6571	0.74611	-0.40546	0.20615	4.1997	0.32105	11.395	0.42745	-0.69315	0.0032375	3.4737	0.79196	2.0625	0.79196	4.6052	0.35102	-7.1954	0.28198	0.93113	0.35103	-7.2282	1.2015	-6.0968	0.29832	-7.2282	1.2074	-6.0968	0.29837	5.5363	-5.8091	-1.1314	0.32049	3.5029	5	13	0.47544	767	346	2.0067	0.034211	57.655	6.04
-6.5023	0.35581	-6.5023	0.35516	4.8928	0.61989	0.72595	4.2763	2.6295	0.73499	-3.8531	3.4445	4.1997	0.61783	11.395	1.2182	-0.69315	0.0011354	3.4737	3.3462	6.4826	3.3462	8.0528	4.1969	-7.1954	0.35536	1.9035	4.1969	-7.2282	4.5743	-2.6491	3.1768	-7.2282	4.5721	-2.6491	3.1786	9.9564	-5.8091	-4.5791	-3.1272	3.5029	4	7	1.6311	52	347	1.8724	0.0011837	1580.8	5.2587
-6.5023	0.30386	-6.5023	0.29919	4.8928	0.45912	0.72595	2.4968	2.6295	0.45011	-2.1293	1.7623	4.1997	0.4584	11.395	0.83015	-0.69315	0.0030311	3.4737	1.9067	4.7588	1.9067	6.329	2.2207	-7.1954	0.30194	1.9035	2.2207	-7.2282	2.7009	-4.373	1.4869	-7.2282	2.6919	-4.373	1.4935	8.2325	-5.8091	-2.8553	-1.4034	3.5029	4	7	0.96191	90	348	1.9771	0.0059437	331.64	5.8636
-6.5023	0.28132	-6.5023	0.28436	4.8928	0.22333	0.72595	0.94445	2.6295	0.59934	-0.40546	0.20615	4.1997	0.22732	11.395	0.38566	-0.69315	0.0029575	3.4737	0.68554	3.0349	0.68554	4.6052	0.363	-7.1954	0.28391	1.9035	0.36301	-7.2282	1.1032	-6.0968	0.31553	-7.2282	1.1046	-6.0968	0.31379	6.5087	-5.8091	-1.1314	0.32049	3.5029	5	15	0.42316	588	349	2.0042	0.026998	73.237	6.0253
-6.5023	0.34933	-6.5023	0.35063	4.8928	0.25009	0.72595	4.3192	3.6019	0.23929	-3.8531	3.2304	4.1997	0.24943	11.395	1.0048	-0.69315	0.00081192	3.4737	3.5457	7.455	3.5457	8.0528	3.7854	-7.1954	0.34998	2.8759	3.7854	-7.2282	4.5525	-2.6491	2.9301	-7.2282	4.5516	-2.6491	2.9328	10.929	-5.8091	-4.5791	-3.1272	3.5029	4	7	1.4565	20	350	1.8723	0.0010893	1717.9	5.2585
-6.5023	0.31961	-6.5023	0.31968	4.8928	0.32687	0.72595	2.5643	3.6019	0.37795	-2.1293	1.7623	4.1997	0.32873	11.395	0.6327	-0.69315	0.0018589	3.4737	2.0388	5.7312	2.0388	6.329	1.9839	-7.1954	0.31879	2.8759	1.9839	-7.2282	2.7188	-4.373	1.5421	-7.2282	2.7172	-4.373	1.5403	9.2049	-5.8091	-2.8553	-1.4034	3.5029	4	8	0.94513	71	351	1.977	0.0054434	362.18	5.8626
-6.5023	0.28304	-6.5023	0.28602	4.8928	0.24827	0.72595	0.80946	3.6019	0.63909	-0.40546	0.20615	4.1997	0.2425	11.395	0.40059	-0.69315	0.0027661	3.4737	0.60602	4.0073	0.60601	4.6052	0.24671	-7.1954	0.28512	2.8759	0.24671	-7.2282	1.0233	-6.0968	0.30463	-7.2282	1.0238	-6.0968	0.30565	7.4811	-5.8091	-1.1314	0.32049	3.5029	5	15	0.412	466	352	2.0033	0.024259	81.58	6.0197
-6.5023	1.8813	-4.0001	3.5523	-4.1997	3.5801	-6.9675	1.6688	-0.28768	1.9448	-7.3008	2.132	-6.7806	1.9665	-0.19962	0.6772	-2.5809	0.98679	0.18688	0.37821	7.0131	0.37821	0.52017	0.15157	-6.581	1.9301	6.6798	0.15157	0.46522	0.21643	0.79851	0.50936	2.9674	1.3111	3.3007	2.0042	7.2	-3.9214	-0.33329	-14.268	0.51161	0	7	2.4599	22448	353	1.5349	1.1813	0.29933	3.5339
-6.5023	1.6874	-4.0001	3.9063	-4.1997	3.5801	-6.9675	1.5651	-0.28768	1.8875	-5.577	1.8178	-6.7806	1.4698	-0.19962	0.33467	-2.5809	1.6057	0.18688	0.16744	5.2893	0.16744	-1.2037	0.32705	-6.581	1.6917	6.6798	0.32705	0.46522	0.13988	-0.92532	0.55443	2.9674	1.8267	1.5769	2.5456	5.4762	-3.9214	1.3905	-12.544	0.51161	0	7	2.4074	13843	354	2.1258	1.4767	0.43959	6.7786
-6.5023	1.8492	-4.0001	4.5116	-4.1997	4.184	-6.9675	1.7725	-0.28768	1.8301	-3.8531	1.7174	-6.7806	1.6506	-0.19962	0.31568	-2.5809	1.8914	0.18688	0.099125	3.5655	0.099123	-2.9275	1.1003	-6.581	1.9201	6.6798	1.1003	0.46522	0.1257	-2.6491	1.2319	2.9674	2.0762	-0.14695	2.8663	3.7523	-3.9214	3.1144	-10.821	0.51161	0	4	2.6441	18084	355	2.3328	1.6037	0.45463	8.1628
-6.5023	1.5632	-4.0001	3.1737	-4.1997	3.2178	-6.9675	1.3507	0.68471	1.4883	-7.3008	1.6621	-6.7806	1.5655	-0.19962	0.65607	-2.5809	1.18	0.18688	0.35989	7.9855	0.35988	0.52017	0.14771	-6.581	1.5808	7.6522	0.14771	0.46522	0.21798	0.79851	0.49456	2.9674	1.5475	3.3007	2.0881	8.1724	-3.9214	-0.33329	-14.268	0.51161	0	7	2.0759	18136	356	1.5343	1.1809	0.29927	3.5311
-6.5023	1.2951	-4.0001	3.8123	-4.1997	3.4593	-6.9675	1.1502	0.68471	1.3736	-5.577	1.2539	-6.7806	1.0547	-0.19962	0.35237	-2.5809	2.1231	0.18688	0.17083	6.2617	0.17083	-1.2037	0.3109	-6.581	1.3063	7.6522	0.3109	0.46522	0.14043	-0.92532	0.54388	2.9674	2.3559	1.5769	2.827	6.4486	-3.9214	1.3905	-12.544	0.51161	0	7	2.0574	11780	357	2.1234	1.4744	0.44011	6.7629
-6.5023	1.4395	-4.0001	4.3377	-4.1997	4.0632	-6.9675	1.3576	0.68471	1.2632	-3.8531	1.3157	-6.7806	1.2118	-0.19962	0.32297	-2.5809	2.2131	0.18688	0.12188	4.5379	0.12188	-2.9275	1.1054	-6.581	1.503	7.6522	1.1054	0.46522	0.11498	-2.6491	1.2644	2.9674	2.3971	-0.14695	3.2988	4.7247	-3.9214	3.1144	-10.821	0.51161	0	4	2.2961	17514	358	2.3202	1.5921	0.45739	8.0753
-6.5023	1.167	-4.0001	2.8836	-4.1997	2.8554	-6.9675	0.93954	1.6571	1.0318	-7.3008	1.1834	-6.7806	1.1131	-0.19962	0.64285	-2.5809	1.5068	0.18688	0.33917	8.9579	0.33917	0.52017	0.14823	-6.581	1.1762	8.6246	0.14823	0.46522	0.22482	0.79851	0.47949	2.9674	1.9009	3.3007	2.2396	9.1448	-3.9214	-0.33329	-14.268	0.51161	0	7	1.6768	13325	359	1.5341	1.1807	0.29925	3.53
-6.5023	0.91156	-4.0001	3.7755	-4.1997	3.3385	-6.9675	0.82983	1.6571	0.91718	-5.577	0.87545	-6.7806	0.72037	-0.19962	0.36533	-2.5809	2.5317	0.18688	0.17173	7.2341	0.17173	-1.2037	0.29083	-6.581	0.9757	8.6246	0.29083	0.46522	0.14368	-0.92532	0.53835	2.9674	2.7646	1.5769	3.1448	7.4209	-3.9214	1.3905	-12.544	0.51161	0	8	1.7747	8873	360	2.1224	1.4736	0.44031	6.7571
-6.5023	1.0823	-4.0001	4.1802	-4.1997	3.8275	-6.9675	1.0317	1.6571	1.0235	-3.8531	1.0565	-6.7806	0.86552	-0.19962	0.33395	-2.5809	2.5801	0.18688	0.15037	5.5102	0.15037	-2.9275	1.1321	-6.581	1.1532	8.6246	1.1321	0.46522	0.10327	-2.6491	1.3257	2.9674	2.7618	-0.14695	3.8882	5.6971	-3.9214	3.1144	-10.821	0.51161	0	4	2.0336	112000	361	2.3155	1.5876	0.45848	8.0422
-6.5023	1.6805	-4.0001	4.5046	-4.1997	4.1469	-6.9675	1.5835	1.6571	1.1372	-2.1293	1.1365	-6.7806	1.4193	-0.19962	0.33994	-2.5809	2.0989	0.18688	0.12605	3.7864	0.12606	-4.6513	2.0873	-6.581	1.7313	8.6246	2.0873	0.46522	0.12722	-4.373	2.3048	2.9674	2.2941	-1.8708	4.5227	3.9733	-3.9214	4.8382	-9.0968	0.51161	0	4	2.3649	154000	362	2.3625	1.6155	0.46242	8.372
-6.5023	0.66166	-4.0001	2.6166	-4.1997	2.4931	-6.9675	0.51723	2.6295	0.57533	-7.3008	0.6283	-6.7806	0.59089	-0.19962	0.62351	-2.5809	1.7846	0.18688	0.31682	9.9303	0.31682	0.52017	0.14415	-6.581	0.73442	9.597	0.14415	0.46522	0.22571	0.79851	0.45757	2.9674	2.1952	3.3007	2.3185	10.117	-3.9214	-0.33329	-14.268	0.51161	4	13	1.2487	8418	363	1.534	1.1807	0.29925	3.5296
-6.5023	0.51658	-4.0001	3.7208	-4.1997	3.3385	-6.9675	0.4179	2.6295	0.518	-5.577	0.56516	-6.7806	0.44344	-0.19962	0.38538	-2.5809	2.9563	0.18688	0.17799	8.2065	0.17799	-1.2037	0.27468	-6.581	0.58658	9.597	0.27468	0.46522	0.15232	-0.92532	0.54087	2.9674	3.2055	1.5769	3.5782	8.3933	-3.9214	1.3905	-12.544	0.51161	4	13	1.5128	6101	364	2.1221	1.4733	0.44038	6.7548
-6.5023	0.78739	-4.0001	4.1225	-4.1997	3.7009	-6.9675	0.73536	2.6295	0.7431	-3.8531	0.75184	-6.7806	0.61457	-0.19962	0.34372	-2.5809	2.9251	0.18688	0.17038	6.4826	0.17038	-2.9275	1.1534	-6.581	0.86097	9.597	1.1534	0.46522	0.097388	-2.6491	1.3829	2.9674	3.1004	-0.14695	4.3319	6.6695	-3.9214	3.1144	-10.821	0.51161	2	7	1.8068	10427	365	2.3137	1.5859	0.4589	8.0297
-6.5023	1.2523	-4.0001	4.3236	-4.1997	3.9424	-6.9675	1.1502	2.6295	1.0318	-2.1293	1.066	-6.7806	0.97965	-0.19962	0.347	-2.5809	2.4272	0.18688	0.15084	4.7588	0.15085	-4.6513	2.3761	-6.581	1.2965	9.597	2.3761	0.46522	0.11509	-4.373	2.6213	2.9674	2.6074	-1.8708	5.1062	4.9457	-3.9214	4.8382	-9.0968	0.51161	0	4	2.1277	17246	366	2.3526	1.6061	0.46474	8.3018
-6.5023	1.9426	-4.0001	4.6041	-4.1997	4.3047	-6.9675	1.7725	2.6295	1.3163	-0.40546	1.4536	-6.7806	1.6468	-0.19962	0.34648	-2.5809	2.0066	0.18688	0.12291	3.0349	0.12292	-6.3752	3.5119	-6.581	1.9597	9.597	3.5119	0.46522	0.14034	-6.0968	3.7476	2.9674	2.2144	-3.5946	5.9918	3.2218	-3.9214	6.562	-7.373	0.51161	0	4	2.5656	18869	367	2.3852	1.6329	0.46074	8.5341
-6.5023	0.25755	-4.0001	2.3305	-4.1997	2.1308	-6.9675	0.19901	3.6019	0.22509	-7.3008	0.31149	-6.7806	0.39192	-0.19962	0.57694	-2.5809	2.0171	0.18688	0.28223	10.903	0.28223	0.52017	0.13399	-6.581	0.2885	10.569	0.13399	0.46522	0.20838	0.79851	0.42313	2.9674	2.3878	3.3007	2.3308	11.09	-3.9214	-0.33329	-14.268	0.51161	4	13	0.90907	3569	368	1.5339	1.1806	0.29924	3.5295
-6.5023	0.25528	-4.0001	3.7758	-4.1997	3.3385	-6.9675	0.30139	3.6019	0.28241	-5.577	0.34369	-6.7806	0.30045	-0.19962	0.41632	-2.5809	3.4665	0.18688	0.1932	9.1788	0.1932	-1.2037	0.25957	-6.581	0.2363	10.569	0.25957	0.46522	0.15703	-0.92532	0.54986	2.9674	3.7042	1.5769	4.1481	9.3657	-3.9214	1.3905	-12.544	0.51161	4	13	1.3829	3184	369	2.1219	1.4731	0.44042	6.754
-6.5023	0.51872	-4.0001	4.0979	-4.1997	3.7009	-6.9675	0.42423	3.6019	0.5117	-3.8531	0.75182	-6.7806	0.44845	-0.19962	0.35352	-2.5809	3.288	0.18688	0.19683	7.455	0.19683	-2.9275	1.2471	-6.581	0.58821	10.569	1.2471	0.46522	0.088573	-2.6491	1.5056	2.9674	3.4499	-0.14695	4.8807	7.6419	-3.9214	3.1144	-10.821	0.51161	3	9	1.6675	6763	370	2.313	1.5853	0.45906	8.0249
-6.5023	0.92917	-4.0001	4.2224	-4.1997	3.8216	-6.9675	0.83908	3.6019	1.2569	-2.1293	1.4359	-6.7806	0.71425	-0.19962	0.36166	-2.5809	2.7906	0.18688	0.17836	5.7312	0.17836	-4.6513	2.6036	-6.581	1.0051	10.569	2.6036	0.46522	0.10347	-4.373	2.8701	2.9674	2.9639	-1.8708	5.7327	5.918	-3.9214	4.8382	-9.0968	0.51161	0	5	2.0842	13215	371	2.3488	1.6026	0.46566	8.2753
-6.5023	1.5603	-4.0001	4.4614	-4.1997	4.0632	-6.9675	1.4613	3.6019	1.7155	-0.40546	1.85	-6.7806	1.2851	-0.19962	0.34817	-2.5809	2.1935	0.18688	0.13378	4.0073	0.13377	-6.3752	3.7965	-6.581	1.605	10.569	3.7965	0.46522	0.13045	-6.0968	4.0584	2.9674	2.3991	-3.5946	6.3213	4.1942	-3.9214	6.562	-7.373	0.51161	0	4	2.5186	19788	372	2.3644	1.6135	0.46538	8.3853
-6.5023	2.6338	-4.0001	4.3328	-4.1997	4.3047	-5.0441	2.1308	-0.28768	1.7155	-7.3008	2.3235	-6.7806	2.6202	-0.19962	2.2754	-2.5809	1.1365	-1.7365	0.70706	7.0131	0.70706	0.52017	0.49922	-6.581	2.6685	4.7565	0.49922	-1.4581	1.387	0.79851	0.79793	1.0441	2.6568	3.3007	2.0943	5.2766	-3.9214	-2.2567	-12.345	0.42393	0	4	2.9069	121000	373	1.9148	1.7543	0.091531	5.4999
-6.5023	1.695	-4.0001	3.0493	-4.1997	3.3385	-5.0441	1.8196	-0.28768	2.0021	-5.577	2.0793	-6.7806	1.9972	-0.19962	1.0191	-2.5809	0.90342	-1.7365	0.49973	5.2893	0.49973	-1.2037	0.204	-6.581	1.6831	4.7565	0.204	-1.4581	0.38417	-0.92532	0.66109	1.0441	1.5182	1.5769	1.9355	3.5528	-3.9214	-0.53283	-10.621	0.42393	0	6	2.3307	15550	374	3.7629	2.9376	0.28096	21.24
-6.5023	2.0951	-4.0001	3.9747	-4.1997	4.9086	-5.0441	1.6776	0.68471	1.2017	-7.3008	2.038	-6.7806	2.5744	-0.19962	2.5945	-2.5809	1.167	-1.7365	0.84848	7.9855	0.84848	0.52017	0.52519	-6.581	2.143	5.7289	0.52519	-1.4581	1.3326	0.79851	0.81745	1.0441	2.68	3.3007	2.2069	6.249	-3.9214	-2.2567	-12.345	0.42393	0	2	2.6493	118000	375	1.9115	1.7535	0.090146	5.4809
-6.5023	1.3072	-4.0001	2.8753	-4.1997	3.2178	-5.0441	1.1974	0.68471	1.3736	-5.577	1.5359	-6.7806	1.5548	-0.19962	1.0115	-2.5809	0.93758	-1.7365	0.46695	6.2617	0.46695	-1.2037	0.20344	-6.581	1.3358	5.7289	0.20344	-1.4581	0.37077	-0.92532	0.67849	1.0441	1.5188	1.5769	2.0413	4.5252	-3.9214	-0.53283	-10.621	0.42393	0	6	1.9179	13003	376	3.7535	2.9314	0.28042	21.133
-6.5023	1.5756	-4.0001	3.5973	-4.1997	5.6332	-5.0441	1.2757	1.6571	1.0891	-7.3008	1.7646	-6.7806	3.2493	-0.19962	2.9789	-2.5809	1.2241	-1.7365	1.5981	8.9579	1.5981	0.52017	0.82625	-6.581	1.6348	6.7012	0.82625	-1.4581	1.2919	0.79851	0.85079	1.0441	2.657	3.3007	2.1132	7.2214	-3.9214	-2.2567	-12.345	0.42393	0	0	2.4893	108000	377	1.9103	1.7532	0.089616	5.4736
-6.5023	1.036	-4.0001	2.6316	-4.1997	2.9762	-5.0441	0.88624	1.6571	0.91718	-5.577	1.1152	-6.7806	1.1527	-0.19962	0.96839	-2.5809	1.1445	-1.7365	0.43377	7.2341	0.43377	-1.2037	0.20025	-6.581	1.0645	6.7012	0.20025	-1.4581	0.37443	-0.92532	0.66256	1.0441	1.7593	1.5769	2.1301	5.4976	-3.9214	-0.53283	-10.621	0.42393	0	6	1.5938	9538	378	3.7499	2.9291	0.28023	21.092
-6.5023	0.83333	-4.0001	3.2828	-4.1997	2.4931	-5.0441	0.77315	1.6571	0.85985	-3.8531	0.89897	-6.7806	0.79071	-0.19962	0.70714	-2.5809	2.1381	-1.7365	0.25431	5.5102	0.25431	-2.9275	0.21649	-6.581	0.89174	6.7012	0.21649	-1.4581	0.40569	-2.6491	0.7953	1.0441	2.6454	-0.14695	3.0689	3.7737	-3.9214	1.191	-8.8973	0.42393	0	6	1.5235	5574	379	5.3055	3.6009	0.47339	42.222
-6.5023	1.1634	-4.0001	3.2102	-4.1997	6.2371	-5.0441	0.88624	2.6295	0.91927	-7.3008	1.8412	-6.7806	4.0177	-0.19962	3.4388	-2.5809	1.3318	-1.7365	2.7238	9.9303	2.7238	0.52017	1.3076	-6.581	1.2095	7.6736	1.3076	-1.4581	1.2614	0.79851	0.88347	1.0441	2.6157	3.3007	1.8993	8.1938	-3.9214	-2.2567	-12.345	0.42393	0	0	2.3762	92781	380	1.9098	1.753	0.089422	5.471
-6.5023	0.64338	-4.0001	2.5302	-4.1997	2.7347	-5.0441	0.5751	2.6295	0.57533	-5.577	0.72407	-6.7806	0.79006	-0.19962	0.94184	-2.5809	1.6297	-1.7365	0.41285	8.2065	0.41285	-1.2037	0.19672	-6.581	0.67288	7.6736	0.19672	-1.4581	0.38397	-0.92532	0.64329	1.0441	2.2015	1.5769	2.3875	6.47	-3.9214	-0.53283	-10.621	0.42393	4	11	1.2971	6647	381	3.7485	2.9282	0.28015	21.077
-6.5023	0.51502	-4.0001	3.2598	-4.1997	2.4931	-5.0441	0.56573	2.6295	0.62845	-3.8531	0.66123	-6.7806	0.64293	-0.19962	0.7278	-2.5809	2.5503	-1.7365	0.25623	6.4826	0.25623	-2.9275	0.19924	-6.581	0.54197	7.6736	0.19924	-1.4581	0.42063	-2.6491	0.79571	1.0441	3.0625	-0.14695	3.465	4.7461	-3.9214	1.191	-8.8973	0.42393	4	12	1.3539	3880	382	5.3001	3.5957	0.47401	42.136
-6.5023	0.76802	-4.0001	2.7736	-4.1997	7.0825	-5.0441	0.88624	3.6019	1.1996	-7.3008	2.1023	-6.7806	4.8574	-0.19962	4.0113	-2.5809	1.3611	-1.7365	4.0497	10.903	4.0497	0.52017	1.9983	-6.581	0.80407	8.646	1.9983	-1.4581	1.2256	0.79851	0.91106	1.0441	2.506	3.3007	1.5153	9.1662	-3.9214	-2.2567	-12.345	0.42393	0	0	2.4687	72435	383	1.9096	1.753	0.08935	5.4699
-6.5023	0.27451	-4.0001	2.6321	-4.1997	2.6139	-5.0441	0.36572	3.6019	0.29082	-5.577	0.58089	-6.7806	0.78337	-0.19962	1.0448	-2.5809	2.295	-1.7365	0.41199	9.1788	0.41199	-1.2037	0.19794	-6.581	0.32687	8.646	0.19794	-1.4581	0.4075	-0.92532	0.69889	1.0441	2.9567	1.5769	3.0338	7.4424	-3.9214	-0.53283	-10.621	0.42393	4	11	1.1263	3565	384	3.748	2.9278	0.28013	21.071
-6.5023	0.27147	-4.0001	3.3974	-4.1997	2.6139	-5.0441	0.36768	3.6019	0.39706	-3.8531	0.65095	-6.7806	0.54578	-0.19962	0.74737	-2.5809	3.205	-1.7365	0.26371	7.455	0.26371	-2.9275	0.20147	-6.581	0.23934	8.646	0.20147	-1.4581	0.42677	-2.6491	0.81383	1.0441	3.723	-0.14695	4.1614	5.7185	-3.9214	1.191	-8.8973	0.42393	4	12	1.2831	2025	385	5.298	3.5937	0.47425	42.104
-6.5023	0.5209	-4.0001	3.5752	-4.1997	2.7347	-5.0441	0.5751	3.6019	0.74099	-2.1293	1.0614	-6.7806	0.59323	-0.19962	0.84149	-2.5809	2.7739	-1.7365	0.28639	5.7312	0.2864	-4.6513	1.1498	-6.581	0.59402	8.646	1.1498	-1.4581	0.46808	-4.373	1.8629	1.0441	3.3501	-1.8708	4.8074	3.9947	-3.9214	2.9148	-7.1734	0.42393	3	8	1.5347	4387	386	5.7894	3.7651	0.53763	50.275
-6.5023	3.0262	-4.0001	4.8971	-4.1997	3.4593	-3.1208	1.9705	-0.28768	1.5435	-7.3008	2.2259	-6.7806	2.2999	-0.19962	1.894	-2.5809	1.5678	-3.6599	0.55567	7.0131	0.55567	0.52017	0.5011	-6.581	3.0447	2.8331	0.5011	-3.3815	1.8444	0.79851	0.78978	-0.87932	3.2317	3.3007	2.2243	3.3533	-3.9214	-4.18	-10.422	0.19626	0	4	2.8538	241000	387	2.0207	1.9266	0.048847	6.1247
-6.5023	2.3578	-4.0001	4.7298	-4.1997	4.184	-3.1208	1.5557	0.68471	1.087	-7.3008	1.9321	-6.7806	2.1385	-0.19962	2.0836	-2.5809	1.7979	-3.6599	0.71971	7.9855	0.71971	0.52017	0.51646	-6.581	2.4095	3.8055	0.51646	-3.3815	1.721	0.79851	0.78572	-0.87932	3.6635	3.3007	2.4253	4.3257	-3.9214	-4.18	-10.422	0.19626	0	4	2.6411	245000	388	1.999	1.9244	0.038808	5.9943
-6.5023	1.7357	-4.0001	4.4623	-4.1997	5.0294	-3.1208	1.2445	1.6571	1.0318	-7.3008	1.6585	-6.7806	2.0822	-0.19962	2.4272	-2.5809	1.9917	-3.6599	1.1406	8.9579	1.1406	0.52017	0.53514	-6.581	1.8031	4.7779	0.53514	-3.3815	1.598	0.79851	0.79281	-0.87932	4.145	3.3007	2.5097	5.298	-3.9214	-4.18	-10.422	0.19626	0	2	2.527	230000	389	1.9908	1.9236	0.034954	5.9449
-6.5023	1.6916	-4.0001	4.3727	-4.1997	4.3047	-3.1208	1.1408	1.6571	1.0318	-5.577	1.474	-6.7806	1.8235	-0.19962	2.5109	-2.5809	1.8851	-3.6599	0.5106	7.2341	0.51059	-1.2037	0.48843	-6.581	1.75	4.7779	0.48843	-3.3815	1.4672	-0.92532	0.93349	-0.87932	3.6569	1.5769	2.6472	3.5742	-3.9214	-2.4562	-8.6977	0.19626	0	4	2.3359	60741	390	4.4753	4.0494	0.10516	30.042
-6.5023	1.2558	-4.0001	4.1596	-4.1997	5.9839	-3.1208	1.0287	2.6295	0.89658	-7.3008	1.4457	-6.7806	2.7391	-0.19962	2.8359	-2.5809	2.1845	-3.6599	1.9618	9.9303	1.9618	0.52017	0.73202	-6.581	1.3254	5.7503	0.73202	-3.3815	1.5219	0.79851	0.80413	-0.87932	4.6087	3.3007	2.4861	6.2704	-3.9214	-4.18	-10.422	0.19626	0	2	2.4617	1590000	391	1.9877	1.9233	0.033486	5.9262
-6.5023	1.253	-4.0001	4.0868	-4.1997	5.1053	-3.1208	0.8916	2.6295	0.93448	-5.577	1.3437	-6.7806	2.267	-0.19962	2.9574	-2.5809	2.0562	-3.6599	1.1451	8.2065	1.1451	-1.2037	0.51147	-6.581	1.3211	5.7503	0.51147	-3.3815	1.4434	-0.92532	1.0069	-0.87932	3.7194	1.5769	2.4566	4.5466	-3.9214	-2.4562	-8.6977	0.19626	0	2	2.2691	420000	392	4.4675	4.0472	0.10383	29.937
-6.5023	0.79284	-4.0001	3.8048	-4.1997	6.841	-3.1208	1.1408	3.6019	1.0849	-7.3008	1.4603	-6.7806	3.6008	-0.19962	3.2913	-2.5809	2.3314	-3.6599	3.1095	10.903	3.1095	0.52017	1.123	-6.581	0.86877	6.7226	1.123	-3.3815	1.4691	0.79851	0.81583	-0.87932	4.8566	3.3007	2.32	7.2428	-3.9214	-4.18	-10.422	0.19626	0	0	2.5208	170000	393	1.9865	1.9231	0.03294	5.9192
-6.5023	0.8161	-4.0001	3.7937	-4.1997	5.9956	-3.1208	0.93342	3.6019	1.1423	-5.577	1.4877	-6.7806	3.16	-0.19962	3.4499	-2.5809	2.1601	-3.6599	2.5588	9.1788	2.5588	-1.2037	1.0303	-6.581	0.89427	6.7226	1.0303	-3.3815	1.4277	-0.92532	1.1	-0.87932	3.6822	1.5769	2.1955	5.519	-3.9214	-2.4562	-8.6977	0.19626	0	0	2.3615	45797	394	4.4645	4.0464	0.10333	29.898
-6.5023	0.51696	-4.0001	3.072	-4.1997	3.3385	-3.1208	0.726	3.6019	0.5117	-3.8531	1.0338	-6.7806	1.5275	-0.19962	2.0027	-2.5809	1.7053	-3.6599	0.42976	7.455	0.42975	-2.9275	0.27426	-6.581	0.58054	6.7226	0.27426	-3.3815	0.99542	-2.6491	1.1998	-0.87932	2.8246	-0.14695	2.6625	3.7952	-3.9214	-0.73237	-6.9739	0.19626	3	8	1.5332	6369	395	8.5593	6.5425	0.30827	109.89
-6.5023	2.873	-4.0001	4.9118	-4.1997	3.4593	-1.1974	1.188	1.6571	1.1464	-7.3008	2.038	-6.7806	2.1025	-0.19962	1.8973	-2.5809	1.7234	-5.5832	2.1202	8.9579	2.1202	0.52017	0.5042	-6.581	2.8672	2.8545	0.5042	-5.3049	3.0578	0.79851	0.79333	-2.8027	5.0456	3.3007	2.4336	3.3747	-3.9214	-6.1034	-8.4982	0.042184	0	2	2.6028	286000	396	2.0293	1.9458	0.042913	6.177
-6.5023	2.2157	-4.0001	4.7507	-4.1997	4.184	-1.1974	1.0944	2.6295	1.2017	-7.3008	1.7557	-6.7806	1.9715	-0.19962	2.0761	-2.5809	1.9796	-5.5832	2.3642	9.9303	2.3642	0.52017	0.51988	-6.581	2.2613	3.8269	0.51988	-5.3049	2.9307	0.79851	0.78369	-2.8027	5.5135	3.3007	2.596	4.3471	-3.9214	-6.1034	-8.4982	0.042184	0	2	2.5337	279000	397	2.0082	1.944	0.033049	6.0493
-6.5023	1.5943	-4.0001	4.4938	-4.1997	5.1501	-1.1974	1.4048	3.6019	1.6008	-7.3008	1.4741	-6.7806	1.9911	-0.19962	2.4395	-2.5809	2.2118	-5.5832	2.8241	10.903	2.8241	0.52017	0.54385	-6.581	1.6664	4.7993	0.54385	-5.3049	2.8457	0.79851	0.79295	-2.8027	5.9536	3.3007	2.642	5.3195	-3.9214	-6.1034	-8.4982	0.042184	0	2	2.6197	253000	398	2.0002	1.9433	0.029259	6.001
-6.5023	1.3847	-4.0001	4.5994	-4.1997	4.7878	-1.1974	1.4048	3.6019	1.7728	-5.577	1.2859	-6.7806	1.9023	-0.19962	2.5871	-2.5809	2.4342	-5.5832	2.065	9.1788	2.065	-1.2037	0.51072	-6.581	1.4358	4.7993	0.51073	-5.3049	2.4287	-0.92532	0.85971	-2.8027	5.8957	1.5769	3.0268	3.5956	-3.9214	-4.3795	-6.7744	0.042184	0	2	2.5392	76858	399	4.5934	4.2877	0.071294	31.649
-6.5023	2.8587	-4.0001	4.9117	-4.1997	3.5801	0.72595	1.9799	3.6019	2.2887	-7.3008	2.0307	-6.7806	2.0938	-0.19962	1.896	-2.5809	1.7341	-7.5066	4.0334	10.903	4.0335	0.52017	0.50474	-6.581	2.8429	2.8759	0.50474	-7.2282	4.9613	0.79851	0.79352	-4.726	6.972	3.3007	2.4568	3.3961	-3.9214	-8.0268	-6.5748	0.0066228	0	2	2.9416	290000	400	2.0297	1.9476	0.042157	6.1798
-6.5023	2.593	-4.0001	3.5504	-1.9265	2.1523	-6.9675	1.5768	-0.28768	2.69	-7.3008	1.4741	-4.5075	1.2454	2.0735	1.7979	-2.5809	0.61076	2.46	1.6073	7.0131	1.6073	2.7933	1.3569	-6.581	2.5687	6.6798	1.3569	0.46522	0.55234	0.79851	0.79813	2.9674	1.3504	3.3007	1.6288	9.4732	-3.9214	-0.33329	-14.268	2.013	0	2	2.3394	48334	401	1.0539	0.85538	0.23209	1.6661
-6.5023	2.612	-4.0001	3.5879	-1.9265	1.954	-6.9675	2.291	-0.28768	2.346	-5.577	1.1455	-4.5075	1.3762	2.0735	2.2354	-2.5809	0.52698	2.46	2.3898	5.2893	2.3899	1.0695	0.57761	-6.581	2.6132	6.6798	0.57761	0.46522	0.41666	-0.92532	1.9564	2.9674	1.0083	1.5769	2.4484	7.7493	-3.9214	1.3905	-12.544	2.013	0	4	2.3227	42961	402	1.4563	1.1897	0.22409	3.1813
-6.5023	3.4451	-4.0001	4.3833	-1.9265	2.0316	-6.9675	3.2244	-0.28768	1.7155	-3.8531	1.6694	-4.5075	1.5119	2.0735	2.7242	-2.5809	0.77306	2.46	3.1673	3.5655	3.1673	-0.65433	1.1677	-6.581	3.4446	6.6798	1.1677	0.46522	0.68742	-2.6491	3.9657	2.9674	1.4454	-0.14695	4.4298	6.0255	-3.9214	3.1144	-10.821	2.013	0	1	2.7449	61041	403	1.5836	1.332	0.18891	3.7617
-6.5023	4.6053	-4.0001	4.9969	-1.9265	2.0316	-6.9675	4.469	-0.28768	1.3142	-2.1293	1.6298	-4.5075	1.419	2.0735	2.7336	-2.5809	0.87048	2.46	3.3731	1.8416	3.3731	-2.3782	2.8165	-6.581	4.5249	6.6798	2.8165	0.46522	0.83056	-4.373	5.7366	2.9674	1.3838	-1.8708	5.5462	4.3017	-3.9214	4.8382	-9.0968	2.013	0	0	3.1745	52199	404	1.6147	1.3537	0.19281	3.9108
-6.5023	1.9566	-4.0001	2.8938	-1.9265	2.1523	-6.9675	1.1502	0.68471	2.1188	-7.3008	1.0949	-4.5075	1.4145	2.0735	1.7202	-2.5809	0.43067	2.46	1.5457	7.9855	1.5457	2.7933	1.3016	-6.581	1.9634	7.6522	1.3016	0.46522	0.48035	0.79851	0.61375	2.9674	1.0107	3.3007	1.1844	10.446	-3.9214	-0.33329	-14.268	2.013	0	3	1.8944	36087	405	1.0538	0.85533	0.23206	1.6658
-6.5023	2.0915	-4.0001	3.0452	-1.9265	1.9108	-6.9675	1.8667	0.68471	1.7749	-5.577	1.0955	-4.5075	1.5244	2.0735	2.1219	-2.5809	0.42026	2.46	2.2257	6.2617	2.2257	1.0695	0.59821	-6.581	2.1059	7.6522	0.59821	0.46522	0.42411	-0.92532	1.7173	2.9674	0.88582	1.5769	2.0151	8.7217	-3.9214	1.3905	-12.544	2.013	0	4	1.9641	34966	406	1.4559	1.1895	0.224	3.1797
-6.5023	2.906	-4.0001	3.9719	-1.9265	2.0747	-6.9675	2.7899	0.68471	1.2017	-3.8531	1.7856	-4.5075	1.6041	2.0735	2.5008	-2.5809	0.67717	2.46	2.9759	4.5379	2.9759	-0.65433	1.2355	-6.581	2.9276	7.6522	1.2355	0.46522	0.65473	-2.6491	3.7167	2.9674	1.3	-0.14695	4.0755	6.9979	-3.9214	3.1144	-10.821	2.013	0	2	2.455	58416	407	1.5817	1.3311	0.18828	3.7527
-6.5023	4.0362	-4.0001	4.6379	-1.9265	1.954	-6.9675	3.7456	0.68471	1.0297	-2.1293	2.0353	-4.5075	1.4254	2.0735	2.8153	-2.5809	0.78272	2.46	3.3128	2.814	3.3128	-2.3782	2.8087	-6.581	3.9728	7.6522	2.8087	0.46522	0.79043	-4.373	5.7669	2.9674	1.432	-1.8708	5.8887	5.2741	-3.9214	4.8382	-9.0968	2.013	0	0	2.9065	57288	408	1.6042	1.3488	0.18937	3.8603
-6.5023	5.0891	-4.0001	5.1644	-1.9265	2.0747	-6.9675	5.0913	0.68471	0.91506	-0.40546	2.6169	-4.5075	1.8648	2.0735	2.658	-2.5809	0.90445	2.46	3.4263	1.0902	3.4263	-4.102	4.5448	-6.581	4.9805	7.6522	4.5447	0.46522	0.85811	-6.0968	7.4281	2.9674	1.3608	-3.5946	7.042	3.5502	-3.9214	6.562	-7.373	2.013	0	0	3.4919	48040	409	1.6348	1.3629	0.19951	4.0087
-6.5023	1.3042	-4.0001	2.0916	-1.9265	2.2731	-6.9675	0.73738	1.6571	1.4904	-7.3008	1.1034	-4.5075	1.6689	2.0735	1.5917	-2.5809	0.25868	2.46	1.4359	8.9579	1.4359	2.7933	1.2189	-6.581	1.3191	8.6246	1.2189	0.46522	0.39007	0.79851	0.41258	2.9674	0.58655	3.3007	0.67251	11.418	-3.9214	-0.33329	-14.268	2.013	1	6	1.5	23287	410	1.0538	0.85531	0.23205	1.6657
-6.5023	1.5501	-4.0001	2.3738	-1.9265	1.9108	-6.9675	1.3576	1.6571	1.3184	-5.577	1.2243	-4.5075	1.8577	2.0735	2.0065	-2.5809	0.31499	2.46	2.0189	7.2341	2.0189	1.0695	0.64039	-6.581	1.5397	8.6246	0.6404	0.46522	0.44696	-0.92532	1.3106	2.9674	0.7171	1.5769	1.4206	9.6941	-3.9214	1.3905	-12.544	2.013	0	5	1.6225	25774	411	1.4558	1.1894	0.22395	3.1791
-6.5023	2.3789	-4.0001	3.4696	-1.9265	2.1523	-6.9675	2.3709	1.6571	1.0318	-3.8531	1.8796	-4.5075	1.8017	2.0735	2.3717	-2.5809	0.58281	2.46	2.684	5.5102	2.684	-0.65433	1.3659	-6.581	2.4215	8.6246	1.3659	0.46522	0.64568	-2.6491	3.4101	2.9674	1.1161	-0.14695	3.5386	7.9703	-3.9214	3.1144	-10.821	2.013	0	2	2.2139	51219	412	1.581	1.3307	0.18804	3.7493
-6.5023	3.4107	-4.0001	4.2608	-1.9265	1.954	-6.9675	3.2205	1.6571	1.0891	-2.1293	2.5044	-4.5075	1.4853	2.0735	2.7087	-2.5809	0.70684	2.46	3.2131	3.7864	3.2131	-2.3782	2.8262	-6.581	3.4013	8.6246	2.8262	0.46522	0.72768	-4.373	5.658	2.9674	1.441	-1.8708	6.0164	6.2464	-3.9214	4.8382	-9.0968	2.013	0	2	2.7399	60167	413	1.6002	1.3469	0.18807	3.8411
-6.5023	4.4787	-4.0001	4.8889	-1.9265	2.0316	-6.9675	4.3653	1.6571	1.1464	-0.40546	3.2064	-4.5075	1.41	2.0735	2.7608	-2.5809	0.80777	2.46	3.3603	2.0625	3.3603	-4.102	4.5319	-6.581	4.4296	8.6246	4.5319	0.46522	0.81064	-6.0968	7.4743	2.9674	1.3755	-3.5946	7.3384	4.5226	-3.9214	6.562	-7.373	2.013	0	0	3.3529	52641	414	1.6128	1.3527	0.19225	3.9016
-6.5023	0.90755	-4.0001	1.5961	-1.9265	2.0316	-6.9675	1.0329	2.6295	0.91927	-5.577	1.1888	-4.5075	2.1318	2.0735	1.8671	-2.5809	0.22138	2.46	1.7255	8.2065	1.7255	1.0695	0.97448	-6.581	0.92483	9.597	0.97448	0.46522	0.44036	-0.92532	1.0138	2.9674	0.52907	1.5769	1.1577	10.666	-3.9214	1.3905	-12.544	2.013	0	3	1.2794	16172	415	1.4558	1.1894	0.22394	3.1788
-6.5023	1.8487	-4.0001	2.9126	-1.9265	2.2731	-6.9675	1.9618	2.6295	0.80462	-3.8531	1.9844	-4.5075	2.1097	2.0735	2.2837	-2.5809	0.493	2.46	2.2763	6.4826	2.2763	-0.65433	1.8493	-6.581	1.9147	9.597	1.8493	0.46522	0.63972	-2.6491	2.8892	2.9674	0.86302	-0.14695	3.1921	8.9427	-3.9214	3.1144	-10.821	2.013	0	2	1.9642	41707	416	1.5807	1.3306	0.18795	3.748
-6.5023	2.8912	-4.0001	3.8434	-1.9265	2.0316	-6.9675	2.7719	2.6295	1.0297	-2.1293	2.9408	-4.5075	1.6547	2.0735	2.5133	-2.5809	0.6052	2.46	2.9722	4.7588	2.9722	-2.3782	2.9165	-6.581	2.9045	9.597	2.9165	0.46522	0.70236	-4.373	5.3913	2.9674	1.3033	-1.8708	5.584	7.2188	-3.9214	4.8382	-9.0968	2.013	0	2	2.5847	55424	417	1.5987	1.3462	0.18758	3.8339
-6.5023	3.9084	-4.0001	4.6099	-1.9265	1.954	-6.9675	3.6393	2.6295	1.3163	-0.40546	3.8236	-4.5075	1.4681	2.0735	2.8095	-2.5809	0.76429	2.46	3.3022	3.0349	3.3022	-4.102	4.5269	-6.581	3.8558	9.597	4.5269	0.46522	0.77976	-6.0968	7.492	2.9674	1.4455	-3.5946	7.6763	5.495	-3.9214	6.562	-7.373	2.013	0	0	3.2086	57937	418	1.6044	1.3488	0.1895	3.861
-6.5023	1.3122	-4.0001	2.1592	-1.9265	2.6786	-6.9675	1.5651	3.6019	0.91296	-3.8531	1.6766	-4.5075	2.5285	2.0735	2.2371	-2.5809	0.40617	2.46	1.9167	7.455	1.9167	-0.65433	3.1096	-6.581	1.3581	10.569	3.1096	0.46522	0.65465	-2.6491	2.666	2.9674	0.55417	-0.14695	2.9921	9.915	-3.9214	3.1144	-10.821	2.013	0	3	1.7174	30524	419	1.5806	1.3306	0.18792	3.7475
-6.5023	2.3508	-4.0001	3.3294	-1.9265	2.1523	-6.9675	2.291	3.6019	1.3142	-2.1293	3.4143	-4.5075	1.9643	2.0735	2.3714	-2.5809	0.50922	2.46	2.6186	5.7312	2.6186	-2.3782	3.1114	-6.581	2.3644	10.569	3.1114	0.46522	0.69019	-4.373	4.9836	2.9674	1.1124	-1.8708	5.0493	8.1912	-3.9214	4.8382	-9.0968	2.013	0	2	2.4754	47140	420	1.5982	1.3459	0.18739	3.8312
-6.5023	3.2505	-4.0001	4.1783	-1.9265	1.9598	-6.9675	3.0237	3.6019	1.9448	-0.40546	4.3727	-4.5075	1.5064	2.0735	2.6607	-2.5809	0.70084	2.46	3.1501	4.0073	3.1501	-4.102	4.5752	-6.581	3.2392	10.569	4.5752	0.46522	0.70305	-6.0968	7.3251	2.9674	1.4134	-3.5946	7.7305	6.4674	-3.9214	6.562	-7.373	2.013	0	2	3.1216	466000	421	1.6012	1.3473	0.18847	3.8457
-6.5023	2.7289	-4.0001	3.2916	-1.9265	2.2793	-5.0441	1.3747	-0.28768	2.2859	-7.3008	1.7652	-4.5075	1.7309	2.0735	2.5635	-2.5809	0.46278	0.53667	1.6733	7.0131	1.6733	2.7933	1.9183	-6.581	2.7226	4.7565	1.9183	-1.4581	2.198	0.79851	1.5379	1.0441	2.5756	3.3007	2.114	7.5498	-3.9214	-2.2567	-12.345	1.8126	0	1	2.2876	730000	422	1.3106	1.1642	0.12577	2.5765
-6.5023	2.775	-4.0001	4.1187	-1.9265	1.5917	-5.0441	1.1974	-0.28768	2.2887	-5.577	1.2849	-4.5075	1.7779	2.0735	3.9374	-2.5809	0.98479	0.53667	2.237	5.2893	2.237	1.0695	1.7801	-6.581	2.797	4.7565	1.7801	-1.4581	1.8072	-0.92532	2.3241	1.0441	3.3853	1.5769	3.8144	5.826	-3.9214	-0.53283	-10.621	1.8126	0	0	2.2094	30225	423	2.5539	2.0356	0.25463	9.784
-6.5023	3.3412	-4.0001	4.4962	-1.9265	1.4277	-5.0441	1.6122	-0.28768	2.1741	-3.8531	1.209	-4.5075	1.3585	2.0735	4.7963	-2.5809	1.0815	0.53667	2.6725	3.5655	2.6725	-0.65433	0.87265	-6.581	3.3071	4.7565	0.87266	-1.4581	2.3308	-2.6491	3.9385	1.0441	3.5956	-0.14695	4.9601	4.1021	-3.9214	1.191	-8.8973	1.8126	0	0	2.3767	22684	424	3.5355	2.6365	0.34099	18.749
-6.5023	2.2146	-4.0001	2.7959	-1.9265	2.6354	-5.0441	1.0531	0.68471	1.6603	-7.3008	1.4578	-4.5075	2.1442	2.0735	2.5868	-2.5809	0.37313	0.53667	1.7104	7.9855	1.7104	2.7933	1.8681	-6.581	2.2178	5.7289	1.8681	-1.4581	2.1694	0.79851	1.41	1.0441	2.4765	3.3007	1.9544	8.5222	-3.9214	-2.2567	-12.345	1.8126	0	1	1.9695	81373	425	1.3101	1.164	0.12549	2.5745
-6.5023	2.3473	-4.0001	3.9563	-1.9265	1.6693	-5.0441	0.97175	0.68471	1.6603	-5.577	1.0061	-4.5075	2.2177	2.0735	3.9167	-2.5809	0.89667	0.53667	2.2323	6.2617	2.2323	1.0695	1.7813	-6.581	2.3507	5.7289	1.7813	-1.4581	1.7381	-0.92532	2.2494	1.0441	3.6329	1.5769	4.1096	6.7984	-3.9214	-0.53283	-10.621	1.8126	0	0	1.9352	23805	426	2.5525	2.0347	0.25446	9.773
-6.5023	2.7793	-4.0001	4.8478	-1.9265	1.4709	-5.0441	1.3011	0.68471	1.3736	-3.8531	1.3277	-4.5075	2.0316	2.0735	5.0351	-2.5809	1.2689	0.53667	2.6701	4.5379	2.6701	-0.65433	0.87734	-6.581	2.8161	5.7289	0.87734	-1.4581	2.4207	-2.6491	4.1231	1.0441	4.3898	-0.14695	6.1436	5.0745	-3.9214	1.191	-8.8973	1.8126	0	0	2.1834	20310	427	3.5296	2.632	0.34103	18.688
-6.5023	3.7671	-4.0001	4.3598	-1.9265	1.3501	-5.0441	2.1308	0.68471	1.2059	-2.1293	1.4715	-4.5075	1.1808	2.0735	4.7967	-2.5809	0.96626	0.53667	2.7534	2.814	2.7534	-2.3782	0.69748	-6.581	3.6726	5.7289	0.69748	-1.4581	2.428	-4.373	5.543	1.0441	3.2808	-1.8708	5.8359	3.3507	-3.9214	2.9148	-7.1734	1.8126	0	2	2.3809	21362	428	3.7763	2.7806	0.35806	21.39
-6.5023	1.6839	-4.0001	2.2535	-1.9265	3.3601	-5.0441	0.95299	1.6571	1.3758	-7.3008	1.4831	-4.5075	2.7047	2.0735	2.6463	-2.5809	0.30993	0.53667	1.832	8.9579	1.832	2.7933	1.7651	-6.581	1.683	6.7012	1.7651	-1.4581	2.1064	0.79851	1.0481	1.0441	2.3976	3.3007	1.4588	9.4945	-3.9214	-2.2567	-12.345	1.8126	0	1	1.8516	65977	429	1.3099	1.1639	0.12539	2.5738
-6.5023	1.8329	-4.0001	3.5877	-1.9265	1.7124	-5.0441	0.77315	1.6571	1.2038	-5.577	1.2807	-4.5075	2.72	2.0735	3.8588	-2.5809	0.88549	0.53667	2.2458	7.2341	2.2458	1.0695	1.7844	-6.581	1.8755	6.7012	1.7844	-1.4581	1.632	-0.92532	2.0591	1.0441	3.7857	1.5769	4.2297	7.7707	-3.9214	-0.53283	-10.621	1.8126	0	0	1.7318	17276	430	2.552	2.0344	0.2544	9.7688
-6.5023	2.3854	-4.0001	5.0046	-1.9265	1.4709	-5.0441	0.98995	1.6571	0.91718	-3.8531	1.7013	-4.5075	2.5878	2.0735	5.1599	-2.5809	1.4574	0.53667	2.6694	5.5102	2.6694	-0.65433	0.87952	-6.581	2.4532	6.7012	0.87953	-1.4581	2.4657	-2.6491	4.2346	1.0441	5.156	-0.14695	6.9506	6.0469	-3.9214	1.191	-8.8973	1.8126	0	0	2.0782	15170	431	3.5275	2.6304	0.34105	18.664
-6.5023	3.1601	-4.0001	4.7385	-1.9265	1.4277	-5.0441	1.5	1.6571	1.2038	-2.1293	2.0058	-4.5075	1.6526	2.0735	5.1042	-2.5809	1.0845	0.53667	2.7538	3.7864	2.7538	-2.3782	0.69537	-6.581	3.1442	6.7012	0.69537	-1.4581	2.4988	-4.373	5.774	1.0441	3.9553	-1.8708	7.1354	4.3231	-3.9214	2.9148	-7.1734	1.8126	0	2	2.3393	20181	432	3.7647	2.7715	0.35834	21.259
-6.5023	1.049	-4.0001	1.6427	-1.9265	4.4471	-5.0441	1.188	2.6295	1.0377	-7.3008	2.0339	-4.5075	3.8466	2.0735	2.7316	-2.5809	0.23821	0.53667	3.0666	9.9303	3.0666	2.7933	1.616	-6.581	1.1045	7.6736	1.616	-1.4581	1.9962	0.79851	0.29923	1.0441	2.2859	3.3007	0.83924	10.467	-3.9214	-2.2567	-12.345	1.8126	0	2	1.8997	48292	433	1.3098	1.1639	0.12536	2.5735
-6.5023	1.3078	-4.0001	2.9398	-1.9265	1.9108	-5.0441	0.98393	2.6295	0.80462	-5.577	1.5113	-4.5075	3.2309	2.0735	3.7751	-2.5809	0.77793	0.53667	2.2801	8.2065	2.2801	1.0695	1.7907	-6.581	1.3295	7.6736	1.7907	-1.4581	1.3754	-0.92532	1.7443	1.0441	3.1088	1.5769	3.4834	8.7431	-3.9214	-0.53283	-10.621	1.8126	0	0	1.5764	11355	434	2.5518	2.0343	0.25437	9.7672
-6.5023	1.9798	-4.0001	5.1676	-1.9265	1.4709	-5.0441	0.87687	2.6295	0.68998	-3.8531	2.2555	-4.5075	3.2378	2.0735	5.3127	-2.5809	2.0827	0.53667	2.6756	6.4826	2.6756	-0.65433	0.88161	-6.581	2.0518	7.6736	0.88162	-1.4581	2.5506	-2.6491	4.365	1.0441	5.9021	-0.14695	7.7033	7.0193	-3.9214	1.191	-8.8973	1.8126	1	1	2.0734	10437	435	3.5266	2.6297	0.34107	18.656
-6.5023	2.6827	-4.0001	5.0128	-1.9265	1.4277	-5.0441	1.1985	2.6295	0.97239	-2.1293	2.6964	-4.5075	2.3608	2.0735	5.3114	-2.5809	1.2698	0.53667	2.7514	4.7588	2.7514	-2.3782	0.69296	-6.581	2.7274	7.6736	0.69295	-1.4581	2.5667	-4.373	5.9478	1.0441	4.8156	-1.8708	8.2499	5.2955	-3.9214	2.9148	-7.1734	1.8126	0	2	2.3317	16803	436	3.7603	2.7681	0.35845	21.21
-6.5023	3.5816	-4.0001	4.4743	-1.9265	1.3501	-5.0441	1.9234	2.6295	1.087	-0.40546	3.1657	-4.5075	1.2157	2.0735	4.8561	-2.5809	0.99194	0.53667	2.7595	3.0349	2.7595	-4.102	2.407	-6.581	3.5282	7.6736	2.407	-1.4581	2.3966	-6.0968	7.2848	1.0441	3.4136	-3.5946	7.8523	3.5716	-3.9214	4.6387	-5.4496	1.8126	0	0	2.597	21414	437	3.7967	2.7896	0.36101	21.622
-6.5023	0.9026	-4.0001	1.3576	-1.9265	4.9302	-5.0441	1.1975	3.6019	1.3715	-7.3008	2.0427	-4.5075	4.3997	2.0735	3.1857	-2.5809	0.23933	0.53667	3.8964	10.903	3.8964	2.7933	1.8145	-6.581	0.90969	8.646	1.8145	-1.4581	1.9766	0.79851	0.27282	1.0441	2.2439	3.3007	0.7014	11.439	-3.9214	-2.2567	-12.345	1.8126	0	3	1.967	37950	438	1.3098	1.1639	0.12534	2.5734
-6.5023	0.77778	-4.0001	1.5705	-1.9265	2.6354	-5.0441	1.3011	3.6019	0.40546	-5.577	1.7534	-4.5075	3.7893	2.0735	3.4512	-2.5809	0.15405	0.53667	2.3628	9.1788	2.3628	1.0695	1.8102	-6.581	0.78981	8.646	1.8102	-1.4581	0.4406	-0.92532	0.57766	1.0441	0.57779	1.5769	0.42401	9.7155	-3.9214	-0.53283	-10.621	1.8126	1	6	1.4073	5344	439	2.5517	2.0343	0.25436	9.7666
-6.5023	1.5708	-4.0001	5.2778	-1.9265	1.4277	-5.0441	1.188	3.6019	0.39706	-3.8531	2.8199	-4.5075	3.8453	2.0735	5.3665	-2.5809	2.6309	0.53667	2.6827	7.455	2.6827	-0.65433	0.88134	-6.581	1.638	8.646	0.88134	-1.4581	2.6185	-2.6491	4.4032	1.0441	6.4882	-0.14695	8.2835	7.9917	-3.9214	1.191	-8.8973	1.8126	1	1	2.1135	6358	440	3.5263	2.6295	0.34106	18.652
-6.5023	2.2657	-4.0001	5.1602	-1.9265	1.4709	-5.0441	0.88624	3.6019	1.0276	-2.1293	3.4154	-4.5075	3.0049	2.0735	5.4413	-2.5809	1.7583	0.53667	2.7544	5.7312	2.7544	-2.3782	0.69161	-6.581	2.3351	8.646	0.69161	-1.4581	2.6249	-4.373	6.0658	1.0441	5.5841	-1.8708	9.0272	6.2678	-3.9214	2.9148	-7.1734	1.8126	0	2	2.371	12269	441	3.7586	2.7668	0.3585	21.191
-6.5023	2.9989	-4.0001	4.8802	-1.9265	1.4277	-5.0441	1.4052	3.6019	1.6008	-0.40546	4.0082	-4.5075	1.8637	2.0735	5.1886	-2.5809	1.2514	0.53667	2.7612	4.0073	2.7612	-4.102	2.4023	-6.581	2.9964	8.646	2.4023	-1.4581	2.5169	-6.0968	7.5488	1.0441	4.2676	-3.5946	9.2989	4.544	-3.9214	4.6387	-5.4496	1.8126	0	0	2.7202	19903	442	3.7875	2.7823	0.36127	21.518
-6.5023	3.2708	-4.0001	3.666	-1.9265	1.9108	-3.1208	1.5557	-0.28768	1.6582	-7.3008	2.0225	-4.5075	1.523	2.0735	2.4794	-2.5809	0.53816	-1.3867	0.37787	7.0131	0.37787	2.7933	1.9312	-6.581	3.2288	2.8331	1.9312	-3.3815	3.282	0.79851	1.0233	-0.87932	3.3889	3.3007	1.3185	5.6264	-3.9214	-4.18	-10.422	1.1332	0	3	2.3473	97204	443	1.3627	1.2399	0.099069	2.7855
-6.5023	3.0047	-4.0001	3.1917	-1.9265	1.8332	-3.1208	1.6594	-0.28768	1.6582	-5.577	1.6159	-4.5075	1.7585	2.0735	2.6543	-2.5809	0.3418	-1.3867	0.93289	5.2893	0.93288	1.0695	2.073	-6.581	2.9656	2.8331	2.073	-3.3815	2.6583	-0.92532	2.0394	-0.87932	2.7302	1.5769	1.5835	3.9026	-3.9214	-2.4562	-8.6977	1.1332	0	1	2.1605	22662	444	2.9974	2.4815	0.20791	13.477
-6.5023	2.7289	-4.0001	3.1654	-1.9265	2.1955	-3.1208	1.452	0.68471	1.1443	-7.3008	1.7624	-4.5075	1.658	2.0735	2.5066	-2.5809	0.46304	-1.3867	0.58338	7.9855	0.58338	2.7933	1.9466	-6.581	2.6752	3.8055	1.9466	-3.3815	3.2248	0.79851	0.90205	-0.87932	3.5415	3.3007	1.3396	6.5988	-3.9214	-4.18	-10.422	1.1332	0	3	2.0748	94983	445	1.3594	1.239	0.097183	2.7721
-6.5023	2.3717	-4.0001	2.9065	-1.9265	2.0747	-3.1208	1.6594	0.68471	1.0912	-5.577	1.5675	-4.5075	2.4596	2.0735	2.9837	-2.5809	0.33311	-1.3867	0.94983	6.2617	0.94982	1.0695	2.0781	-6.581	2.388	3.8055	2.0781	-3.3815	2.4322	-0.92532	2.1532	-0.87932	2.7194	1.5769	1.8729	4.875	-3.9214	-2.4562	-8.6977	1.1332	0	1	1.9452	23847	446	2.989	2.4772	0.20661	13.402
-6.5023	2.206	-4.0001	2.6637	-1.9265	2.5578	-3.1208	1.5557	1.6571	1.0891	-7.3008	1.5507	-4.5075	2.0449	2.0735	2.622	-2.5809	0.42054	-1.3867	1.0217	8.9579	1.0217	2.7933	1.9679	-6.581	2.1744	4.7779	1.9679	-3.3815	3.2033	0.79851	0.79499	-0.87932	3.735	3.3007	1.3166	7.5712	-3.9214	-4.18	-10.422	1.1332	0	1	1.9372	88271	447	1.3582	1.2387	0.096458	2.767
-6.5023	1.8415	-4.0001	2.3685	-1.9265	2.5147	-3.1208	1.6729	1.6571	1.0318	-5.577	1.4153	-4.5075	2.9822	2.0735	3.0574	-2.5809	0.32636	-1.3867	1.1008	7.2341	1.1008	1.0695	2.0799	-6.581	1.868	4.7779	2.0799	-3.3815	2.3916	-0.92532	1.8921	-0.87932	2.6789	1.5769	1.5896	5.8474	-3.9214	-2.4562	-8.6977	1.1332	0	1	1.8074	22342	448	2.9859	2.4756	0.20611	13.373
-6.5023	2.6751	-4.0001	5.289	-1.9265	1.4709	-3.1208	1.5557	1.6571	1.2038	-3.8531	1.3157	-4.5075	2.7067	2.0735	5.8707	-2.5809	1.2875	-1.3867	1.2997	5.5102	1.2997	-0.65433	1.9036	-6.581	2.7406	4.7779	1.9036	-3.3815	4.5455	-2.6491	3.9078	-0.87932	6.8704	-0.14695	6.2398	4.1235	-3.9214	-0.73237	-6.9739	1.1332	0	0	2.2517	13689	449	5.2889	3.6263	0.45846	41.958
-6.5023	1.6949	-4.0001	2.2147	-1.9265	3.2393	-3.1208	1.7631	2.6295	0.91507	-7.3008	1.2723	-4.5075	2.5954	2.0735	2.7977	-2.5809	0.4021	-1.3867	1.9752	9.9303	1.9752	2.7933	1.9783	-6.581	1.7155	5.7503	1.9783	-3.3815	3.1016	0.79851	0.54023	-0.87932	3.8321	3.3007	1.1545	8.5436	-3.9214	-4.18	-10.422	1.1332	0	2	1.8499	76417	450	1.3577	1.2386	0.096187	2.765
-6.5023	1.5023	-4.0001	1.9377	-1.9265	3.0718	-3.1208	1.7146	2.6295	0.93448	-5.577	1.5759	-4.5075	3.4514	2.0735	3.3316	-2.5809	0.32994	-1.3867	2.147	8.2065	2.147	1.0695	2.0869	-6.581	1.5241	5.7503	2.0869	-3.3815	2.3628	-0.92532	1.698	-0.87932	2.6496	1.5769	1.3646	6.8198	-3.9214	-2.4562	-8.6977	1.1332	0	1	1.7895	153000	451	2.9847	2.475	0.20593	13.362
-6.5023	2.3122	-4.0001	5.4445	-1.9265	1.4806	-3.1208	1.8552	2.6295	0.88506	-3.8531	1.6233	-4.5075	3.3102	2.0735	5.9366	-2.5809	1.8889	-1.3867	1.301	6.4826	1.301	-0.65433	1.9066	-6.581	2.3868	5.7503	1.9066	-3.3815	4.5891	-2.6491	3.9527	-0.87932	7.6132	-0.14695	6.982	5.0959	-3.9214	-0.73237	-6.9739	1.1332	0	0	2.2668	80628	452	5.2851	3.6227	0.45887	41.898
-6.5023	1.9262	-4.0001	4.9902	-1.9265	1.1862	-3.1208	1.452	2.6295	1.0297	-2.1293	1.8178	-4.5075	2.6595	2.0735	5.1064	-2.5809	2.1977	-1.3867	1.4619	4.7588	1.4619	-2.3782	0.88382	-6.581	1.9591	5.7503	0.88382	-3.3815	3.5854	-4.373	4.1178	-0.87932	6.6367	-1.8708	7.193	3.3721	-3.9214	0.99147	-5.2501	1.1332	0	0	2.067	10701	453	6.6492	4.2039	0.58168	66.318
-6.5023	1.1773	-4.0001	1.7278	-1.9265	4.0847	-3.1208	1.9705	3.6019	1.1996	-7.3008	1.3866	-4.5075	3.6092	2.0735	3.0163	-2.5809	0.38735	-1.3867	3.3139	10.903	3.3139	2.7933	1.9554	-6.581	1.2033	6.7226	1.9554	-3.3815	2.7903	0.79851	0.21925	-0.87932	3.531	3.3007	0.83577	9.516	-3.9214	-4.18	-10.422	1.1332	0	2	1.9244	61013	454	1.3575	1.2385	0.09609	2.7643
-6.5023	1.0514	-4.0001	1.508	-1.9265	3.8432	-3.1208	1.8668	3.6019	1.1423	-5.577	1.7516	-4.5075	3.8817	2.0735	3.6595	-2.5809	0.32809	-1.3867	3.228	9.1788	3.228	1.0695	2.099	-6.581	1.1098	6.7226	2.099	-3.3815	2.329	-0.92532	1.4373	-0.87932	2.6202	1.5769	1.0687	7.7921	-3.9214	-2.4562	-8.6977	1.1332	0	1	1.8605	16627	455	2.9842	2.4748	0.20586	13.358
-6.5023	2.0743	-4.0001	5.6459	-1.9265	1.4709	-3.1208	2.4891	3.6019	0.91296	-3.8531	1.9811	-4.5075	3.8995	2.0735	6.1506	-2.5809	2.5711	-1.3867	1.3055	7.455	1.3055	-0.65433	1.9083	-6.581	2.1134	6.7226	1.9083	-3.3815	4.7898	-2.6491	4.1729	-0.87932	8.4054	-0.14695	7.7867	6.0683	-3.9214	-0.73237	-6.9739	1.1332	0	0	2.429	7197	456	5.2836	3.6214	0.45901	41.875
-6.5023	1.5966	-4.0001	5.4337	-1.9265	1.2293	-3.1208	2.178	3.6019	1.2569	-2.1293	2.7576	-4.5075	3.6689	2.0735	5.3402	-2.5809	3.1459	-1.3867	1.4847	5.7312	1.4847	-2.3782	0.88295	-6.581	1.6732	6.7226	0.88295	-3.3815	3.7809	-4.373	4.3639	-0.87932	7.7106	-1.8708	8.2985	4.3445	-3.9214	0.99147	-5.2501	1.1332	0	0	2.4087	7664	457	6.6428	4.1968	0.58281	66.19
-6.5023	4.5702	-4.0001	4.2509	-1.9265	1.7124	-1.1974	1.2098	-0.28768	1.1996	-7.3008	2.9774	-4.5075	1.546	2.0735	2.2271	-2.5809	0.79188	-3.31	1.8484	7.0131	1.8484	2.7933	1.8184	-6.581	4.4279	0.90975	1.8184	-5.3049	4.76	0.79851	0.83055	-2.8027	4.1601	3.3007	0.99441	3.7031	-3.9214	-6.1034	-8.4982	0.34951	0	0	2.6534	77650	458	1.397	1.2518	0.11599	2.9274
-6.5023	3.9132	-4.0001	3.9555	-1.9265	1.79	-1.1974	1.3954	0.68471	0.9766	-7.3008	2.4231	-4.5075	1.3776	2.0735	2.2851	-2.5809	0.62824	-3.31	1.8828	7.9855	1.8828	2.7933	1.8725	-6.581	3.8188	1.8821	1.8725	-5.3049	4.8503	0.79851	0.88879	-2.8027	4.5273	3.3007	1.0757	4.6755	-3.9214	-6.1034	-8.4982	0.34951	0	1	2.409	87213	459	1.3749	1.246	0.10342	2.8355
-6.5023	3.2678	-4.0001	3.607	-1.9265	1.9108	-1.1974	1.6602	1.6571	1.1464	-7.3008	2.0133	-4.5075	1.5227	2.0735	2.4994	-2.5809	0.53485	-3.31	1.9448	8.9579	1.9448	2.7933	1.9373	-6.581	3.2212	2.8545	1.9373	-5.3049	5.0324	0.79851	1.0274	-2.8027	5.1092	3.3007	1.3274	5.6478	-3.9214	-6.1034	-8.4982	0.34951	0	1	2.2676	95663	460	1.3664	1.2438	0.09858	2.8007
-6.5023	2.8742	-4.0001	3.1462	-1.9265	1.872	-1.1974	1.6028	1.6571	1.1464	-5.577	1.628	-4.5075	1.8325	2.0735	2.5198	-2.5809	0.34939	-3.31	1.093	7.2341	1.093	1.0695	2.0927	-6.581	2.8581	2.8545	2.0927	-5.3049	4.2767	-0.92532	1.9485	-2.8027	4.4777	1.5769	1.394	3.924	-3.9214	-4.3795	-6.7744	0.34951	0	1	2.0449	21164	461	3.043	2.5265	0.20446	13.89
-6.5023	2.6907	-4.0001	3.152	-1.9265	2.1955	-1.1974	1.9234	2.6295	1.1444	-7.3008	1.756	-4.5075	1.6513	2.0735	2.5338	-2.5809	0.46259	-3.31	2.118	9.9303	2.118	2.7933	1.9553	-6.581	2.6578	3.8269	1.9553	-5.3049	4.9485	0.79851	0.91525	-2.8027	5.306	3.3007	1.3319	6.6202	-3.9214	-6.1034	-8.4982	0.34951	0	1	2.1437	93126	462	1.3632	1.243	0.096742	2.7875
-6.5023	2.3392	-4.0001	2.814	-1.9265	2.1955	-1.1974	1.914	2.6295	1.259	-5.577	1.5693	-4.5075	2.5381	2.0735	2.9135	-2.5809	0.34783	-3.31	1.2686	8.2065	1.2686	1.0695	2.1023	-6.581	2.3493	3.8269	2.1023	-5.3049	4.2691	-0.92532	2.13	-2.8027	4.572	1.5769	1.7682	4.8964	-3.9214	-4.3795	-6.7744	0.34951	0	1	2.0152	22245	463	3.0349	2.5224	0.20319	13.816
-6.5023	2.1111	-4.0001	2.6438	-1.9265	2.5578	-1.1974	2.3288	3.6019	1.5435	-7.3008	1.5458	-4.5075	2.0636	2.0735	2.6433	-2.5809	0.42172	-3.31	2.6972	10.903	2.6972	2.7933	1.978	-6.581	2.138	4.7993	1.978	-5.3049	4.859	0.79851	0.79754	-2.8027	5.5353	3.3007	1.3117	7.5926	-3.9214	-6.1034	-8.4982	0.34951	0	1	2.1218	86267	464	1.362	1.2427	0.096036	2.7826
-6.5023	1.8335	-4.0001	2.3794	-1.9265	2.5147	-1.1974	2.1308	3.6019	1.7155	-5.577	1.4139	-4.5075	3.0021	2.0735	3.0566	-2.5809	0.34093	-3.31	2.6494	9.1788	2.6494	1.0695	2.1045	-6.581	1.8577	4.7993	2.1045	-5.3049	4.2358	-0.92532	1.9587	-2.8027	4.5628	1.5769	1.6699	5.8688	-3.9214	-4.3795	-6.7744	0.34951	0	1	1.998	20904	465	3.0319	2.5209	0.20272	13.788
-6.5023	2.2021	-4.0001	5.1283	-1.9265	1.4709	-1.1974	3.0642	3.6019	1.5435	-3.8531	1.5037	-4.5075	2.8972	2.0735	5.4647	-2.5809	1.7157	-3.31	0.42786	7.455	0.42786	-0.65433	1.9717	-6.581	2.2336	4.7993	1.9717	-5.3049	5.8268	-2.6491	3.4418	-2.8027	8.677	-0.14695	6.2724	4.145	-3.9214	-2.6557	-5.0506	0.34951	0	2	2.4854	14997	466	5.6924	3.9956	0.42467	48.605
-6.5023	4.5632	-4.0001	4.2558	-1.9265	1.7124	0.72595	1.8762	1.6571	1.1465	-7.3008	2.9679	-4.5075	1.5335	2.0735	2.2315	-2.5809	0.79398	-5.2334	3.7494	8.9579	3.7494	2.7933	1.8215	-6.581	4.4142	0.93113	1.8215	-7.2282	6.6985	0.79851	0.84474	-4.726	6.109	3.3007	1.0137	3.7245	-3.9214	-8.0268	-6.5748	0.062525	0	0	2.7537	77958	467	1.3965	1.2517	0.11569	2.9253
-6.5023	3.9064	-4.0001	3.9578	-1.9265	1.79	0.72595	2.4985	2.6295	1.4883	-7.3008	2.4142	-4.5075	1.3793	2.0735	2.3082	-2.5809	0.62867	-5.2334	3.7949	9.9303	3.7949	2.7933	1.8766	-6.581	3.8082	1.9035	1.8766	-7.2282	6.7958	0.79851	0.90645	-4.726	6.4863	3.3007	1.0849	4.6969	-3.9214	-8.0268	-6.5748	0.062525	0	1	2.6759	87737	468	1.3748	1.246	0.10339	2.8353
-6.5023	3.267	-4.0001	3.6129	-1.9265	1.9108	0.72595	3.1525	3.6019	2.2314	-7.3008	2.0164	-4.5075	1.5233	2.0735	2.5113	-2.5809	0.53221	-5.2334	3.868	10.903	3.868	2.7933	1.9444	-6.581	3.2157	2.8759	1.9444	-7.2282	6.9762	0.79851	1.0486	-4.726	7.0534	3.3007	1.3292	5.6692	-3.9214	-8.0268	-6.5748	0.062525	0	1	2.6985	95642	469	1.3666	1.2439	0.098654	2.8013
-6.5023	2.8726	-4.0001	3.152	-1.9265	1.8332	0.72595	3.017	3.6019	2.2887	-5.577	1.5359	-4.5075	1.8764	2.0735	2.5988	-2.5809	0.3575	-5.2334	2.9838	9.1788	2.9838	1.0695	2.0981	-6.581	2.8411	2.8759	2.0981	-7.2282	6.2084	-0.92532	2.0585	-4.726	6.4648	1.5769	1.6034	3.9454	-3.9214	-6.3029	-4.851	0.062525	0	1	2.4499	21997	470	3.0461	2.5283	0.2048	13.918
-6.5023	1.956	-4.0001	2.2805	0.34656	2.2947	-6.9675	1.6453	-0.28768	2.9766	-5.577	1.5558	-2.2344	2.9336	4.3467	1.4445	-2.5809	0.23061	4.7331	1.7332	5.2893	1.7332	3.3426	1.6647	-6.581	1.9644	6.6798	1.6647	0.46522	0.79951	-0.92532	1.3875	2.9674	0.90469	1.5769	1.3937	10.022	-3.9214	1.3905	-12.544	4.1585	0	1	2.1182	30430	471	1.3689	1.1525	0.18771	2.8108
-6.5023	1.6978	-4.0001	1.7015	0.34656	2.2947	-6.9675	2.9819	-0.28768	2.4607	-3.8531	2.3486	-2.2344	2.7063	4.3467	1.5336	-2.5809	0.11253	4.7331	3.5936	3.5655	3.5936	1.6188	1.3373	-6.581	1.6971	6.6798	1.3373	0.46522	2.1468	-2.6491	3.1214	2.9674	2.6843	-0.14695	3.0612	8.2986	-3.9214	3.1144	-10.821	4.1585	0	1	2.2475	46032	472	1.4851	1.2976	0.14452	3.3085
-6.5023	2.4716	-4.0001	2.2817	0.34656	2.2947	-6.9675	4.0541	-0.28768	1.8875	-2.1293	3.0444	-2.2344	2.2408	4.3467	2.0215	-2.5809	0.15857	4.7331	5.6699	1.8416	5.6699	-0.10506	1.7625	-6.581	2.3928	6.6798	1.7625	0.46522	2.6256	-4.373	4.8777	2.9674	3.1755	-1.8708	4.7711	6.5748	-3.9214	4.8382	-9.0968	4.1585	0	1	2.6723	47407	473	1.5015	1.3122	0.14428	3.3817
-6.5023	3.4245	-4.0001	2.9439	0.34656	2.0532	-6.9675	5.195	-0.28768	1.3715	-0.40546	4.3238	-2.2344	1.8292	4.3467	3.279	-2.5809	0.43825	4.7331	5.9834	0.11778	5.9834	-1.8289	3.0129	-6.581	3.353	6.6798	3.013	0.46522	2.7835	-6.0968	6.8238	2.9674	3.248	-3.5946	6.4787	4.8509	-3.9214	6.562	-7.373	4.1585	0	1	3.2187	43021	474	1.5109	1.3157	0.14839	3.4242
-6.5023	1.2968	-4.0001	1.4597	0.34656	2.0532	-6.9675	1.878	0.68471	1.3779	-5.577	1.1506	-2.2344	2.0488	4.3467	1.0261	-2.5809	0.15315	4.7331	1.0508	6.2617	1.0509	3.3426	1.3135	-6.581	1.3014	7.6522	1.3135	0.46522	0.45999	-0.92532	1.119	2.9674	0.32011	1.5769	1.2418	10.995	-3.9214	1.3905	-12.544	4.1585	0	3	1.536	20796	475	1.3689	1.1525	0.18769	2.8106
-6.5023	1.1818	-4.0001	1.2355	0.34656	2.4155	-6.9675	2.6022	0.68471	1.6603	-3.8531	2.3564	-2.2344	2.6671	4.3467	1.4983	-2.5809	0.080823	4.7331	2.6528	4.5379	2.6528	1.6188	1.7663	-6.581	1.1903	7.6522	1.7663	0.46522	1.9509	-2.6491	3.1017	2.9674	2.3388	-0.14695	3.0456	9.271	-3.9214	3.1144	-10.821	4.1585	0	1	1.9086	39021	476	1.4849	1.2975	0.14442	3.3075
-6.5023	1.9608	-4.0001	1.8769	0.34656	2.2947	-6.9675	3.49	0.68471	1.3163	-2.1293	3.2134	-2.2344	2.48	4.3467	1.6128	-2.5809	0.12363	4.7331	4.4655	2.814	4.4655	-0.10506	2.1537	-6.581	1.9496	7.6522	2.1537	0.46522	2.4442	-4.373	4.8359	2.9674	2.9875	-1.8708	4.7573	7.5472	-3.9214	4.8382	-9.0968	4.1585	0	1	2.3587	45836	477	1.5003	1.3117	0.14376	3.3765
-6.5023	2.8701	-4.0001	2.6403	0.34656	2.1739	-6.9675	4.469	0.68471	1.0339	-0.40546	4.6165	-2.2344	2.0951	4.3467	2.6397	-2.5809	0.25522	4.7331	5.9047	1.0902	5.9047	-1.8289	3.1474	-6.581	2.7966	7.6522	3.1474	0.46522	2.6998	-6.0968	6.6877	2.9674	3.2638	-3.5946	6.4964	5.8233	-3.9214	6.562	-7.373	4.1585	0	1	2.9673	46987	478	1.5044	1.3133	0.14558	3.395
-6.5023	0.78539	-4.0001	0.91157	0.34656	2.5363	-6.9675	2.6022	1.6571	1.2038	-3.8531	2.0798	-2.2344	2.6275	4.3467	1.5643	-2.5809	0.066842	4.7331	2.0513	5.5102	2.0513	1.6188	2.3545	-6.581	0.79257	8.6246	2.3545	0.46522	1.7376	-2.6491	3.0632	2.9674	1.7789	-0.14695	2.9991	10.243	-3.9214	3.1144	-10.821	4.1585	0	1	1.6865	30532	479	1.4849	1.2975	0.14439	3.3072
-6.5023	1.4431	-4.0001	1.4474	0.34656	2.2947	-6.9675	2.9133	1.6571	1.2038	-2.1293	3.2519	-2.2344	2.6194	4.3467	1.4685	-2.5809	0.083964	4.7331	3.2613	3.7864	3.2613	-0.10506	2.7744	-6.581	1.4449	8.6246	2.7744	0.46522	2.2464	-4.373	4.8153	2.9674	2.7308	-1.8708	4.7459	8.5195	-3.9214	4.8382	-9.0968	4.1585	0	1	2.0924	41199	480	1.4999	1.3116	0.14358	3.3745
-6.5023	2.3035	-4.0001	2.1756	0.34656	2.2363	-6.9675	3.9497	1.6571	1.0614	-0.40546	4.7686	-2.2344	2.2732	4.3467	1.8935	-2.5809	0.15354	4.7331	5.4419	2.0625	5.4419	-1.8289	3.5143	-6.581	2.2897	8.6246	3.5143	0.46522	2.5722	-6.0968	6.5847	2.9674	3.1187	-3.5946	6.4909	6.7957	-3.9214	6.562	-7.373	4.1585	0	1	2.7492	364000	481	1.502	1.3123	0.14452	3.384
-6.5023	0.63503	-4.0001	0.66859	0.34656	2.8752	-6.9675	2.411	2.6295	0.93448	-3.8531	1.9887	-2.2344	2.8161	4.3467	1.8616	-2.5809	0.076353	4.7331	1.8381	6.4826	1.8381	1.6188	3.0827	-6.581	0.63543	9.597	3.0827	0.46522	1.6056	-2.6491	3.0146	2.9674	1.351	-0.14695	2.9855	11.216	-3.9214	3.1144	-10.821	4.1585	2	4	1.5855	187000	482	1.4848	1.2975	0.14438	3.307
-6.5023	1.0794	-4.0001	1.1228	0.34656	2.4759	-6.9675	2.7494	2.6295	1.0103	-2.1293	2.9738	-2.2344	2.6465	4.3467	1.4828	-2.5809	0.082592	4.7331	2.4603	4.7588	2.4603	-0.10506	3.5193	-6.581	1.0866	9.597	3.5193	0.46522	2.0443	-4.373	4.794	2.9674	2.3311	-1.8708	4.7082	9.4919	-3.9214	4.8382	-9.0968	4.1585	0	1	1.9019	268000	483	1.4997	1.3115	0.14351	3.3738
-6.5023	1.8312	-4.0001	1.7419	0.34656	2.2947	-6.9675	3.3282	2.6295	1.0297	-0.40546	4.9592	-2.2344	2.5158	4.3467	1.552	-2.5809	0.11662	4.7331	4.1589	3.0349	4.1589	-1.8289	3.9841	-6.581	1.8237	9.597	3.9841	0.46522	2.3833	-6.0968	6.5544	2.9674	2.9234	-3.5946	6.479	7.7681	-3.9214	6.562	-7.373	4.1585	0	1	2.5308	44664	484	1.5011	1.312	0.14412	3.3798
-6.5023	0.64909	-4.0001	0.73887	0.34656	2.657	-6.9675	2.7059	3.6019	1.4289	-2.1293	2.6589	-2.2344	2.6438	4.3467	1.6336	-2.5809	0.060422	4.7331	1.9925	5.7312	1.9925	-0.10506	4.3829	-6.581	0.65824	10.569	4.3829	0.46522	1.8344	-4.373	4.7346	2.9674	1.7549	-1.8708	4.6644	10.464	-3.9214	4.8382	-9.0968	4.1585	2	4	1.8064	27357	485	1.4997	1.3115	0.14348	3.3735
-6.5023	1.4269	-4.0001	1.3753	0.34656	2.4155	-6.9675	2.883	3.6019	1.3715	-0.40546	4.8785	-2.2344	2.6109	4.3467	1.4459	-2.5809	0.078154	4.7331	3.0195	4.0073	3.0195	-1.8289	4.6455	-6.581	1.4201	10.569	4.6455	0.46522	2.1768	-6.0968	6.5332	2.9674	2.6088	-3.5946	6.4612	8.7405	-3.9214	6.562	-7.373	4.1585	0	1	2.3918	39840	486	1.5007	1.3119	0.14397	3.3782
-6.5023	1.5661	-4.0001	1.6538	0.34656	2.4155	-5.0441	1.2045	-0.28768	2.7473	-7.3008	1.6526	-2.2344	2.7964	4.3467	1.513	-2.5809	0.15151	2.8098	2.3354	7.0131	2.3354	5.0664	2.322	-6.581	1.568	4.7565	2.322	-1.4581	2.2722	0.79851	1.0413	1.0441	2.2698	3.3007	0.97227	9.8229	-3.9214	-2.2567	-12.345	3.9274	0	1	1.8733	50394	487	1.2316	1.0785	0.14199	2.2754
-6.5023	2.0952	-4.0001	2.6736	0.34656	2.4155	-5.0441	0.98995	-0.28768	2.9193	-5.577	1.4744	-2.2344	3.8113	4.3467	2.2053	-2.5809	0.13865	2.8098	2.4014	5.2893	2.4014	3.3426	2.7902	-6.581	2.1396	4.7565	2.7902	-1.4581	0.91185	-0.92532	1.3602	1.0441	0.88425	1.5769	1.4355	8.0991	-3.9214	-0.53283	-10.621	3.9274	0	1	2.0947	15338	488	2.395	1.9015	0.25956	8.6042
-6.5023	1.1682	-4.0001	1.1113	0.34656	2.0532	-5.0441	2.6493	-0.28768	2.0594	-3.8531	1.4049	-2.2344	1.9335	4.3467	1.0987	-2.5809	0.037274	2.8098	1.3724	3.5655	1.3724	1.6188	1.3567	-6.581	1.1637	4.7565	1.3567	-1.4581	0.81389	-2.6491	1.292	1.0441	0.85119	-0.14695	1.2063	6.3752	-3.9214	1.191	-8.8973	3.9274	0	1	1.741	10170	489	3.2911	2.4677	0.33368	16.247
-6.5023	1.4241	-4.0001	1.3388	0.34656	1.6908	-5.0441	3.8939	-0.28768	1.4862	-2.1293	1.4491	-2.2344	1.6239	4.3467	0.96166	-2.5809	0.042061	2.8098	2.0599	1.8416	2.0599	-0.10506	2.0525	-6.581	1.41	4.7565	2.0525	-1.4581	1.8014	-4.373	2.8594	1.0441	1.9269	-1.8708	2.7031	4.6514	-3.9214	2.9148	-7.1734	3.9274	0	1	1.8805	8429	490	3.4883	2.5791	0.3525	18.252
-6.5023	1.0436	-4.0001	1.1675	0.34656	2.5363	-5.0441	1.4044	0.68471	1.4883	-7.3008	2.1212	-2.2344	2.5327	4.3467	1.3418	-2.5809	0.13353	2.8098	1.9243	7.9855	1.9243	5.0664	1.7413	-6.581	1.0449	5.7289	1.7413	-1.4581	2.2027	0.79851	0.1309	1.0441	2.1792	3.3007	0.37733	10.795	-3.9214	-2.2567	-12.345	3.9274	0	3	1.6269	37103	491	1.2316	1.0785	0.14196	2.2752
-6.5023	1.5581	-4.0001	1.8185	0.34656	2.2947	-5.0441	1.0937	0.68471	2.2908	-5.577	1.6171	-2.2344	3.0915	4.3467	1.6962	-2.5809	0.063026	2.8098	1.7378	6.2617	1.7378	3.3426	1.8543	-6.581	1.5546	5.7289	1.8543	-1.4581	0.7355	-0.92532	0.71239	1.0441	0.72297	1.5769	0.72022	9.0715	-3.9214	-0.53283	-10.621	3.9274	0	5	1.7788	11100	492	2.3949	1.9014	0.25954	8.6031
-6.5023	0.91154	-4.0001	0.9354	0.34656	2.2947	-5.0441	2.2345	0.68471	1.3205	-3.8531	1.2313	-2.2344	2.2531	4.3467	1.2865	-2.5809	0.035258	2.8098	1.2578	4.5379	1.2578	1.6188	1.5819	-6.581	0.91295	5.7289	1.5818	-1.4581	0.67879	-2.6491	1.2625	1.0441	0.68077	-0.14695	1.2147	7.3476	-3.9214	1.191	-8.8973	3.9274	0	3	1.488	9593	493	3.2905	2.4672	0.33367	16.241
-6.5023	1.1714	-4.0001	1.114	0.34656	1.9324	-5.0441	3.3753	0.68471	1.087	-2.1293	1.4715	-2.2344	1.8583	4.3467	1.0148	-2.5809	0.036856	2.8098	1.6404	2.814	1.6404	-0.10506	2.3486	-6.581	1.1702	5.7289	2.3486	-1.4581	1.5455	-4.373	2.8202	1.0441	1.6191	-1.8708	2.7017	5.6238	-3.9214	2.9148	-7.1734	3.9274	0	1	1.6919	9419	494	3.4849	2.5765	0.35257	18.216
-6.5023	1.5575	-4.0001	1.4633	0.34656	1.5701	-5.0441	4.205	0.68471	0.91506	-0.40546	2.1766	-2.2344	1.4583	4.3467	0.9701	-2.5809	0.049688	2.8098	2.5911	1.0902	2.5911	-1.8289	3.3638	-6.581	1.5515	5.7289	3.3638	-1.4581	1.9877	-6.0968	4.5885	1.0441	2.1393	-3.5946	4.3884	3.9	-3.9214	4.6387	-5.4496	3.9274	0	1	1.9812	7419	495	3.5079	2.5881	0.35543	18.458
-6.5023	0.9045	-4.0001	0.94757	0.34656	2.1739	-5.0441	0.98202	1.6571	1.2611	-5.577	1.436	-2.2344	2.2327	4.3467	1.3619	-2.5809	0.048531	2.8098	1.3821	7.2341	1.3821	3.3426	1.296	-6.581	0.89943	6.7012	1.296	-1.4581	0.51855	-0.92532	0.33741	1.0441	0.53858	1.5769	0.29724	10.044	-3.9214	-0.53283	-10.621	3.9274	0	5	1.2842	6545	496	2.3948	1.9013	0.25953	8.6026
-6.5023	0.77103	-4.0001	0.72114	0.34656	2.657	-5.0441	1.9234	1.6571	1.1465	-3.8531	1.1151	-2.2344	2.6327	4.3467	1.6333	-2.5809	0.034346	2.8098	1.2773	5.5102	1.2773	1.6188	1.9041	-6.581	0.76727	6.7012	1.9041	-1.4581	0.6055	-2.6491	1.2282	1.0441	0.58368	-0.14695	1.2147	8.32	-3.9214	1.191	-8.8973	3.9274	1	4	1.389	8428	497	3.2902	2.467	0.33367	16.238
-6.5023	0.90906	-4.0001	0.95169	0.34656	2.2947	-5.0441	2.8568	1.6571	1.0891	-2.1293	1.4715	-2.2344	2.1809	4.3467	1.1976	-2.5809	0.034173	2.8098	1.3981	3.7864	1.3981	-0.10506	2.6863	-6.581	0.91139	6.7012	2.6863	-1.4581	1.2852	-4.373	2.7681	1.0441	1.327	-1.8708	2.6814	6.5962	-3.9214	2.9148	-7.1734	3.9274	0	1	1.5955	9662	498	3.4836	2.5755	0.35259	18.203
-6.5023	1.313	-4.0001	1.3103	0.34656	1.6908	-5.0441	3.6865	1.6571	1.0891	-0.40546	2.2704	-2.2344	1.6641	4.3467	0.96794	-2.5809	0.041711	2.8098	1.8894	2.0625	1.8894	-1.8289	3.7219	-6.581	1.3095	6.7012	3.7219	-1.4581	1.6748	-6.0968	4.5568	1.0441	1.7802	-3.5946	4.398	4.8723	-3.9214	4.6387	-5.4496	3.9274	0	1	1.8934	8816	499	3.5008	2.5824	0.3556	18.383
-6.5023	0.64327	-4.0001	0.66908	0.34656	2.5363	-5.0441	0.77601	2.6295	0.97239	-5.577	1.1248	-2.2344	2.5951	4.3467	1.7185	-2.5809	0.046038	2.8098	1.8001	8.2065	1.8001	3.3426	1.4408	-6.581	0.64722	7.6736	1.4408	-1.4581	0.47711	-0.92532	0.30955	1.0441	0.50395	1.5769	0.26778	11.016	-3.9214	-0.53283	-10.621	3.9274	2	8	1.1203	4943	500	2.3948	1.9013	0.25953	8.6025
-6.5023	0.51548	-4.0001	0.56539	0.34656	3.0194	-5.0441	1.6122	2.6295	0.91927	-3.8531	0.97676	-2.2344	2.993	4.3467	2.1391	-2.5809	0.034236	2.8098	1.3889	6.4826	1.3889	1.6188	2.4044	-6.581	0.51765	7.6736	2.4044	-1.4581	0.5475	-2.6491	1.1846	1.0441	0.51532	-0.14695	1.1938	9.2924	-3.9214	1.191	-8.8973	3.9274	2	6	1.2681	6785	501	3.2901	2.467	0.33367	16.237
-6.5023	0.77786	-4.0001	0.80276	0.34656	2.657	-5.0441	2.4419	2.6295	1.0297	-2.1293	1.4746	-2.2344	2.6143	4.3467	1.5702	-2.5809	0.033224	2.8098	1.3257	4.7588	1.3257	-0.10506	3.2982	-6.581	0.78036	7.6736	3.2982	-1.4581	1.1089	-4.373	2.7083	1.0441	1.1139	-1.8708	2.667	7.5686	-3.9214	2.9148	-7.1734	3.9274	0	1	1.5307	9106	502	3.4831	2.5751	0.35261	18.198
-6.5023	1.1664	-4.0001	1.1019	0.34656	1.9324	-5.0441	3.1679	2.6295	1.2017	-0.40546	2.4389	-2.2344	1.9081	4.3467	1.0363	-2.5809	0.036663	2.8098	1.5636	3.0349	1.5636	-1.8289	4.0528	-6.581	1.1606	7.6736	4.0528	-1.4581	1.4092	-6.0968	4.505	1.0441	1.473	-3.5946	4.391	5.8447	-3.9214	4.6387	-5.4496	3.9274	0	1	1.8349	9575	503	3.498	2.5803	0.35566	18.354
-6.5023	0.40547	-4.0001	0.4255	0.34656	3.3817	-5.0441	1.3011	3.6019	1.1423	-3.8531	0.95126	-2.2344	3.3527	4.3467	2.6478	-2.5809	0.034298	2.8098	1.6157	7.455	1.6157	1.6188	2.9551	-6.581	0.40283	8.646	2.9551	-1.4581	0.49566	-2.6491	1.137	1.0441	0.46324	-0.14695	1.1619	10.265	-3.9214	1.191	-8.8973	3.9274	2	6	1.2679	5186	504	3.2901	2.4669	0.33367	16.237
-6.5023	0.64346	-4.0001	0.64334	0.34656	3.0194	-5.0441	2.1308	3.6019	1.4289	-2.1293	1.5595	-2.2344	2.9785	4.3467	2.0622	-2.5809	0.03339	2.8098	1.3494	5.7312	1.3494	-0.10506	3.9009	-6.581	0.64768	8.646	3.9009	-1.4581	0.90555	-4.373	2.6229	1.0441	0.88323	-1.8708	2.6238	8.541	-3.9214	2.9148	-7.1734	3.9274	2	4	1.5709	7905	505	3.4829	2.5749	0.35262	18.196
-6.5023	0.90744	-4.0001	0.94229	0.34656	2.2947	-5.0441	2.753	3.6019	1.7728	-0.40546	2.6338	-2.2344	2.2858	4.3467	1.2625	-2.5809	0.034015	2.8098	1.3558	4.0073	1.3559	-1.8289	4.4874	-6.581	0.91072	8.646	4.4874	-1.4581	1.1573	-6.0968	4.4438	1.0441	1.1837	-3.5946	4.3724	6.8171	-3.9214	4.6387	-5.4496	3.9274	0	1	1.884	9481	506	3.497	2.5795	0.35569	18.344
-6.5023	2.0747	-4.0001	2.0116	0.34656	2.2947	-3.1208	1.7631	-0.28768	2.2887	-7.3008	1.572	-2.2344	2.4474	4.3467	1.6626	-2.5809	0.1487	0.88641	1.958	7.0131	1.958	5.0664	2.742	-6.581	2.0019	2.8331	2.742	-3.3815	2.9983	0.79851	0.28814	-0.87932	2.8665	3.3007	0.40711	7.8995	-3.9214	-4.18	-10.422	3.0655	0	3	2.0008	58674	507	1.2758	1.138	0.1211	2.4416
-6.5023	1.1634	-4.0001	1.1019	0.34656	1.8116	-3.1208	1.9705	-0.28768	1.8015	-5.577	2.0961	-2.2344	1.7884	4.3467	1.0116	-2.5809	0.042153	0.88641	1.7019	5.2893	1.7019	3.3426	1.478	-6.581	1.1588	2.8331	1.478	-3.3815	1.9875	-0.92532	0.058568	-0.87932	2.0095	1.5769	0.10993	6.1757	-3.9214	-2.4562	-8.6977	3.0655	0	3	1.6575	11782	508	2.7889	2.2288	0.25132	11.667
-6.5023	1.0287	-4.0001	0.94922	0.34656	1.6908	-3.1208	1.8668	-0.28768	1.6582	-3.8531	1.5976	-2.2344	1.6453	4.3467	0.90183	-2.5809	0.042738	0.88641	1.0695	3.5655	1.0695	1.6188	1.1181	-6.581	1.0091	2.8331	1.1181	-3.3815	0.9192	-2.6491	0.21624	-0.87932	0.92669	-0.14695	0.26075	4.4519	-3.9214	-0.73237	-6.9739	3.0655	0	3	1.4652	7447	509	4.8262	3.0652	0.57454	34.939
-6.5023	1.571	-4.0001	1.6148	0.34656	2.4155	-3.1208	1.9705	0.68471	1.6029	-7.3008	1.3639	-2.2344	2.7089	4.3467	1.4923	-2.5809	0.13195	0.88641	1.9542	7.9855	1.9542	5.0664	2.4273	-6.581	1.5741	3.8055	2.4273	-3.3815	2.9266	0.79851	0.14829	-0.87932	2.9613	3.3007	0.3347	8.8719	-3.9214	-4.18	-10.422	3.0655	0	3	1.7565	52554	510	1.2755	1.1379	0.1209	2.4402
-6.5023	0.98203	-4.0001	0.96444	0.34656	2.1564	-3.1208	1.7146	0.68471	1.2262	-5.577	2.1463	-2.2344	2.0925	4.3467	1.1273	-2.5809	0.0328	0.88641	1.8167	6.2617	1.8167	3.3426	1.5031	-6.581	0.98177	3.8055	1.5031	-3.3815	2.224	-0.92532	0.081597	-0.87932	2.2415	1.5769	0.14201	7.1481	-3.9214	-2.4562	-8.6977	3.0655	0	3	1.5317	90929	511	2.788	2.2282	0.25121	11.659
-6.5023	0.8957	-4.0001	0.87034	0.34656	1.7571	-3.1208	1.3031	0.68471	1.2756	-3.8531	1.678	-2.2344	1.7317	4.3467	0.92842	-2.5809	0.036515	0.88641	1.1577	4.5379	1.1577	1.6188	1.0465	-6.581	0.89583	3.8055	1.0465	-3.3815	0.88482	-2.6491	0.24469	-0.87932	0.88665	-0.14695	0.30393	5.4243	-3.9214	-0.73237	-6.9739	3.0655	0	3	1.2966	53521	512	4.8232	3.0619	0.57524	34.895
-6.5023	0.90085	-4.0001	0.85986	0.34656	1.3285	-3.1208	2.0742	0.68471	1.0912	-2.1293	0.90758	-2.2344	1.336	4.3467	0.57466	-2.5809	0.054292	0.88641	1.0167	2.814	1.0167	-0.10506	1.2003	-6.581	0.90122	3.8055	1.2003	-3.3815	0.71193	-4.373	0.95315	-0.87932	0.72311	-1.8708	0.93729	3.7004	-3.9214	0.99147	-5.2501	3.0655	0	4	1.1937	6051	513	5.8053	3.2916	0.76364	50.552
-6.5023	1.173	-4.0001	1.2548	0.34656	2.5363	-3.1208	2.0742	1.6571	1.2611	-7.3008	1.5675	-2.2344	2.7249	4.3467	1.4914	-2.5809	0.11732	0.88641	2.0152	8.9579	2.0152	5.0664	2.136	-6.581	1.1754	4.7779	2.136	-3.3815	2.5952	0.79851	0.077621	-0.87932	2.7882	3.3007	0.26456	9.8443	-3.9214	-4.18	-10.422	3.0655	0	3	1.6445	43202	514	1.2753	1.1378	0.12083	2.4397
-6.5023	0.77786	-4.0001	0.81006	0.34656	2.5363	-3.1208	1.6594	1.6571	1.1464	-5.577	1.9731	-2.2344	2.4484	4.3467	1.4254	-2.5809	0.04067	0.88641	2.035	7.2341	2.035	3.3426	1.4901	-6.581	0.7804	4.7779	1.4901	-3.3815	2.2673	-0.92532	0.11363	-0.87932	2.2879	1.5769	0.13255	8.1205	-3.9214	-2.4562	-8.6977	3.0655	0	3	1.4839	10911	515	2.7876	2.228	0.25118	11.656
-6.5023	0.63886	-4.0001	0.57817	0.34656	2.1739	-3.1208	1.2445	1.6571	1.1464	-3.8531	1.164	-2.2344	2.1538	4.3467	1.4278	-2.5809	0.042928	0.88641	1.3816	5.5102	1.3816	1.6188	1.3403	-6.581	0.62552	4.7779	1.3403	-3.3815	0.88119	-2.6491	0.22319	-0.87932	0.90026	-0.14695	0.2678	6.3966	-3.9214	-0.73237	-6.9739	3.0655	2	6	1.1577	7477	516	4.8221	3.0606	0.57552	34.879
-6.5023	0.77117	-4.0001	0.80213	0.34656	1.6908	-3.1208	1.6594	1.6571	1.0318	-2.1293	0.89853	-2.2344	1.6144	4.3467	0.73842	-2.5809	0.058553	0.88641	1.0274	3.7864	1.0274	-0.10506	1.4821	-6.581	0.7765	4.7779	1.4821	-3.3815	0.48815	-4.373	0.94425	-0.87932	0.48747	-1.8708	0.94123	4.6728	-3.9214	0.99147	-5.2501	3.0655	0	4	1.1423	5637	517	5.8	3.2848	0.76572	50.46
-6.5023	0.78395	-4.0001	0.95168	0.34656	2.7778	-3.1208	2.0742	2.6295	0.97239	-7.3008	1.8458	-2.2344	2.7309	4.3467	1.6102	-2.5809	0.10123	0.88641	2.8166	9.9303	2.8166	5.0664	1.9044	-6.581	0.80058	5.7503	1.9044	-3.3815	2.3516	0.79851	0.057072	-0.87932	2.557	3.3007	0.23006	10.817	-3.9214	-4.18	-10.422	3.0655	0	3	1.5676	33454	518	1.2753	1.1378	0.1208	2.4395
-6.5023	0.51538	-4.0001	0.57894	0.34656	2.7778	-3.1208	1.5557	2.6295	0.97239	-5.577	1.7959	-2.2344	2.7799	4.3467	1.8742	-2.5809	0.040809	0.88641	2.5496	8.2065	2.5496	3.3426	1.4992	-6.581	0.51759	5.7503	1.4992	-3.3815	2.2647	-0.92532	0.18335	-0.87932	2.2932	1.5769	0.16598	9.0929	-3.9214	-2.4562	-8.6977	3.0655	2	6	1.366	9330	519	2.7875	2.2279	0.25116	11.655
-6.5023	0.40547	-4.0001	0.45373	0.34656	2.657	-3.1208	1.0371	2.6295	0.97659	-3.8531	0.98871	-2.2344	2.6042	4.3467	1.9032	-2.5809	0.044259	0.88641	1.7149	6.4826	1.7149	1.6188	1.5344	-6.581	0.40934	5.7503	1.5344	-3.3815	0.84593	-2.6491	0.2236	-0.87932	0.87214	-0.14695	0.26741	7.369	-3.9214	-0.73237	-6.9739	3.0655	2	6	1.0864	6272	520	4.8216	3.0602	0.57561	34.872
-6.5023	0.64281	-4.0001	0.71203	0.34656	2.0532	-3.1208	1.2445	2.6295	0.86194	-2.1293	0.8136	-2.2344	2.0158	4.3467	1.1685	-2.5809	0.067102	0.88641	1.0821	4.7588	1.0821	-0.10506	1.7146	-6.581	0.64726	5.7503	1.7146	-3.3815	0.29504	-4.373	0.89906	-0.87932	0.33446	-1.8708	0.90973	5.6452	-3.9214	0.99147	-5.2501	3.0655	2	6	1.0547	4681	521	5.798	3.2822	0.7665	50.425
-6.5023	0.76777	-4.0001	0.73665	0.34656	1.4493	-3.1208	2.0742	2.6295	1.0297	-0.40546	1.1922	-2.2344	1.4253	4.3467	0.56632	-2.5809	0.070446	0.88641	0.97736	3.0349	0.97736	-1.8289	2.7216	-6.581	0.7446	5.7503	2.7216	-3.3815	0.76628	-6.0968	2.4262	-0.87932	0.77163	-3.5946	2.428	3.9214	-3.9214	2.7153	-3.5262	3.0655	1	4	1.2083	5937	522	5.9387	3.3363	0.78003	52.902
-6.5023	0.40547	-4.0001	0.4379	0.34656	3.2609	-3.1208	1.5557	3.6019	1.1423	-5.577	1.5904	-2.2344	3.1715	4.3467	2.3921	-2.5809	0.041095	0.88641	3.2026	9.1788	3.2026	3.3426	1.5326	-6.581	0.40261	6.7226	1.5326	-3.3815	2.2478	-0.92532	0.25749	-0.87932	2.2797	1.5769	0.21705	10.065	-3.9214	-2.4562	-8.6977	3.0655	2	6	1.3988	7389	523	2.7875	2.2279	0.25116	11.655
-6.5023	0.40547	-4.0001	0.37686	0.34656	3.0194	-3.1208	0.8297	3.6019	1.0849	-3.8531	0.83415	-2.2344	2.9925	4.3467	2.4408	-2.5809	0.044747	0.88641	2.3133	7.455	2.3133	1.6188	1.8	-6.581	0.40116	6.7226	1.8	-3.3815	0.80402	-2.6491	0.22478	-0.87932	0.83525	-0.14695	0.26683	8.3414	-3.9214	-0.73237	-6.9739	3.0655	2	6	1.0917	4912	524	4.8215	3.06	0.57566	34.87
-6.5023	0.51326	-4.0001	0.60637	0.34656	2.8986	-3.1208	0.9334	3.6019	0.85564	-2.1293	0.69662	-2.2344	2.8006	4.3467	1.895	-2.5809	0.077646	0.88641	1.4506	5.7312	1.4506	-0.10506	2.1671	-6.581	0.51689	6.7226	2.1671	-3.3815	0.2376	-4.373	0.87459	-0.87932	0.31017	-1.8708	0.90227	6.6176	-3.9214	0.99147	-5.2501	3.0655	3	7	1.084	3248	525	5.7972	3.2812	0.76681	50.412
-6.5023	0.63864	-4.0001	0.65297	0.34656	2.0532	-3.1208	1.7631	3.6019	1.3715	-0.40546	1.3801	-2.2344	1.9754	4.3467	0.95054	-2.5809	0.084208	0.88641	0.97645	4.0073	0.97645	-1.8289	3.1893	-6.581	0.63897	6.7226	3.1893	-3.3815	0.67205	-6.0968	2.4601	-0.87932	0.6409	-3.5946	2.4866	4.8937	-3.9214	2.7153	-3.5262	3.0655	2	6	1.3099	5623	526	5.9345	3.3308	0.7817	52.828
-6.5023	3.0315	-4.0001	2.8991	0.34656	2.1739	-1.1974	1.7066	-0.28768	1.6008	-7.3008	1.988	-2.2344	1.9983	4.3467	2.954	-2.5809	0.3168	-1.0369	0.50151	7.0131	0.50151	5.0664	3.4861	-6.581	2.9992	0.90975	3.4861	-5.3049	4.3747	0.79851	0.53749	-2.8027	3.8389	3.3007	0.63555	5.9762	-3.9214	-6.1034	-8.4982	1.6218	0	5	2.2333	61066	527	1.2822	1.1412	0.12354	2.466
-6.5023	1.5611	-4.0001	1.4735	0.34656	1.5701	-1.1974	1.4048	-0.28768	1.2569	-5.577	2.1961	-2.2344	1.5021	4.3467	1.0343	-2.5809	0.051224	-1.0369	1.6595	5.2893	1.6595	3.3426	1.5455	-6.581	1.5527	0.90975	1.5455	-5.3049	1.8091	-0.92532	0.04584	-2.8027	1.6979	1.5769	0.15854	4.2524	-3.9214	-4.3795	-6.7744	1.6218	0	3	1.5771	8810	528	2.8323	2.2539	0.25662	12.033
-6.5023	2.4945	-4.0001	2.4106	0.34656	2.1739	-1.1974	1.914	0.68471	1.1443	-7.3008	1.8296	-2.2344	2.2023	4.3467	2.0881	-2.5809	0.20876	-1.0369	0.83223	7.9855	0.83223	5.0664	3.0733	-6.581	2.4798	1.8821	3.0733	-5.3049	4.2422	0.79851	0.41562	-2.8027	3.9261	3.3007	0.51364	6.9486	-3.9214	-6.1034	-8.4982	1.6218	0	3	1.9945	60941	529	1.2797	1.1404	0.12216	2.4565
-6.5023	1.4227	-4.0001	1.333	0.34656	1.6908	-1.1974	1.4048	0.68471	0.9766	-5.577	2.2348	-2.2344	1.6453	4.3467	0.96194	-2.5809	0.044689	-1.0369	1.9122	6.2617	1.9122	3.3426	1.4385	-6.581	1.4048	1.8821	1.4385	-5.3049	2.0042	-0.92532	0.044334	-2.8027	1.906	1.5769	0.12982	5.2248	-3.9214	-4.3795	-6.7744	1.6218	0	3	1.5105	10118	530	2.826	2.2501	0.25597	11.98
-6.5023	1.0447	-4.0001	1.0879	0.34656	1.4493	-1.1974	1.1974	0.68471	0.85774	-3.8531	1.8796	-2.2344	1.4104	4.3467	0.71176	-2.5809	0.046766	-1.0369	1.6759	4.5379	1.6759	1.6188	0.93364	-6.581	1.0447	1.8821	0.93364	-5.3049	1.6246	-2.6491	0.13356	-2.8027	1.6156	-0.14695	0.19432	3.5009	-3.9214	-2.6557	-5.0506	1.6218	0	4	1.2528	5848	531	5.1	3.1643	0.61176	39.016
-6.5023	2.0731	-4.0001	2.0078	0.34656	2.2947	-1.1974	2.2281	1.6571	1.0891	-7.3008	1.5712	-2.2344	2.4673	4.3467	1.6635	-2.5809	0.14778	-1.0369	1.401	8.9579	1.401	5.0664	2.7179	-6.581	1.9897	2.8545	2.7179	-5.3049	4.1605	0.79851	0.26691	-2.8027	4.0329	3.3007	0.39597	7.921	-3.9214	-6.1034	-8.4982	1.6218	0	3	1.8773	58037	532	1.2788	1.1401	0.12164	2.453
-6.5023	1.17	-4.0001	1.1842	0.34656	1.9324	-1.1974	1.5085	1.6571	1.0891	-5.577	2.1992	-2.2344	1.8829	4.3467	0.99947	-2.5809	0.040705	-1.0369	2.4388	7.2341	2.4388	3.3426	1.4376	-6.581	1.1726	2.8545	1.4376	-5.3049	2.2747	-0.92532	0.053379	-2.8027	2.1945	1.5769	0.12314	6.1971	-3.9214	-4.3795	-6.7744	1.6218	0	3	1.5139	11036	533	2.8236	2.2486	0.25572	11.959
-6.5023	0.90995	-4.0001	0.95351	0.34656	1.5701	-1.1974	1.1974	1.6571	1.0318	-3.8531	1.7856	-2.2344	1.5493	4.3467	0.78334	-2.5809	0.047212	-1.0369	2.0235	5.5102	2.0235	1.6188	0.91529	-6.581	0.9119	2.8545	0.91528	-5.3049	1.7973	-2.6491	0.18543	-2.8027	1.7995	-0.14695	0.21803	4.4733	-3.9214	-2.6557	-5.0506	1.6218	0	3	1.2414	6789	534	5.0927	3.1559	0.61371	38.903
-6.5023	1.5623	-4.0001	1.5841	0.34656	2.4155	-1.1974	2.6493	2.6295	0.97239	-7.3008	1.3599	-2.2344	2.7262	4.3467	1.5195	-2.5809	0.12943	-1.0369	2.361	9.9303	2.361	5.0664	2.4229	-6.581	1.5652	3.8269	2.4229	-5.3049	4.0798	0.79851	0.1388	-2.8027	4.1188	3.3007	0.31286	8.8933	-3.9214	-6.1034	-8.4982	1.6218	0	3	1.7572	51864	535	1.2784	1.14	0.12145	2.4516
-6.5023	0.91117	-4.0001	0.96979	0.34656	2.1739	-1.1974	1.7066	2.6295	1.1444	-5.577	2.0871	-2.2344	2.1502	4.3467	1.1597	-2.5809	0.038781	-1.0369	3.1729	8.2065	3.1729	3.3426	1.4559	-6.581	0.91267	3.8269	1.4559	-5.3049	2.5746	-0.92532	0.080835	-2.8027	2.5424	1.5769	0.13798	7.1695	-3.9214	-4.3795	-6.7744	1.6218	0	3	1.4988	11125	536	2.8227	2.2481	0.25563	11.952
-6.5023	0.77619	-4.0001	0.82422	0.34656	1.8116	-1.1974	1.2917	2.6295	1.0297	-3.8531	1.7856	-2.2344	1.7586	4.3467	0.95571	-2.5809	0.048932	-1.0369	2.5034	6.4826	2.5034	1.6188	0.96721	-6.581	0.77952	3.8269	0.96721	-5.3049	2.031	-2.6491	0.31619	-2.8027	2.0516	-0.14695	0.30956	5.4457	-3.9214	-2.6557	-5.0506	1.6218	0	3	1.2532	6731	537	5.0899	3.1527	0.61445	38.861
-6.5023	0.40547	-4.0001	0.47943	0.34656	0.84543	-1.1974	0.78252	2.6295	0.7473	-2.1293	0.81962	-2.2344	0.83364	4.3467	0.28867	-2.5809	0.10316	-1.0369	0.92615	4.7588	0.92615	-0.10506	0.7601	-6.581	0.40542	3.8269	0.7601	-5.3049	0.85044	-4.373	0.45304	-2.8027	0.88366	-1.8708	0.54869	3.7219	-3.9214	-0.93188	-3.3267	1.6218	3	8	0.67996	3565	538	6.6647	3.5775	0.86293	66.628
-6.5023	1.1673	-4.0001	1.2247	0.34656	2.657	-1.1974	2.6764	3.6019	1.3715	-7.3008	1.5659	-2.2344	2.7347	4.3467	1.5326	-2.5809	0.11469	-1.0369	3.5456	10.903	3.5456	5.0664	2.1294	-6.581	1.1714	4.7993	2.1294	-5.3049	3.8921	0.79851	0.078052	-2.8027	3.979	3.3007	0.24861	9.8657	-3.9214	-6.1034	-8.4982	1.6218	0	3	1.7771	43158	539	1.2783	1.14	0.12137	2.4511
-6.5023	0.77658	-4.0001	0.81891	0.34656	2.5363	-1.1974	1.914	3.6019	1.6008	-5.577	1.9685	-2.2344	2.5133	4.3467	1.4609	-2.5809	0.038229	-1.0369	3.8441	9.1788	3.8441	3.3426	1.4654	-6.581	0.77971	4.7993	1.4654	-5.3049	2.8654	-0.92532	0.13323	-2.8027	2.8641	1.5769	0.16162	8.1419	-3.9214	-4.3795	-6.7744	1.6218	0	3	1.6025	10267	540	2.8224	2.2479	0.25559	11.949
-6.5023	0.55529	-4.0001	0.6375	0.34656	2.7953	-1.1974	1.3001	3.6019	1.5657	-3.8531	1.3672	-2.2344	2.7017	4.3467	1.8252	-2.5809	0.070796	-1.0369	3.1221	7.455	3.1221	1.6188	1.4525	-6.581	0.55678	4.7993	1.4525	-5.3049	1.9664	-2.6491	0.2371	-2.8027	1.988	-0.14695	0.20693	6.4181	-3.9214	-2.6557	-5.0506	1.6218	2	6	1.3702	52344	541	5.0888	3.1515	0.61472	38.844
-6.5023	0.3812	-4.0001	0.43736	0.34656	1.198	-1.1974	0.75743	3.6019	0.61803	-2.1293	0.69992	-2.2344	1.0245	4.3467	0.55564	-2.5809	0.14491	-1.0369	1.3161	5.7312	1.3161	-0.10506	0.88856	-6.581	0.39084	4.7993	0.88856	-5.3049	0.951	-4.373	0.46267	-2.8027	1.021	-1.8708	0.54923	4.6942	-3.9214	-0.93188	-3.3267	1.6218	4	9	0.68199	17683	542	6.6602	3.5713	0.86494	66.537
-6.5023	4.3098	-4.0001	3.5824	0.34656	1.8116	0.72595	1.7725	-0.28768	1.1423	-7.3008	2.853	-2.2344	1.4473	4.3467	3.8009	-2.5809	0.65211	-2.9603	1.8163	7.0131	1.8163	5.0664	3.7176	-6.581	4.1397	-1.0136	3.7176	-7.2282	6.2533	0.79851	0.55807	-4.726	5.2635	3.3007	0.71782	4.0528	-3.9214	-8.0268	-6.5748	0.48641	0	3	2.5786	48759	543	1.3052	1.1486	0.13637	2.5554
-6.5023	3.5648	-4.0001	3.1775	0.34656	1.9324	0.72595	2.2911	0.68471	0.97238	-7.3008	2.3342	-2.2344	1.6875	4.3467	3.483	-2.5809	0.47886	-2.9603	1.8543	7.9855	1.8543	5.0664	3.5633	-6.581	3.5085	-0.041241	3.5633	-7.2282	6.1155	0.79851	0.49831	-4.726	5.3805	3.3007	0.62978	5.0252	-3.9214	-8.0268	-6.5748	0.48641	0	3	2.3787	54743	544	1.2886	1.1432	0.12711	2.4906
-6.5023	1.8158	-4.0001	1.6215	0.34656	1.4493	0.72595	0.94281	0.68471	0.80463	-5.577	2.1949	-2.2344	1.3998	4.3467	1.2417	-2.5809	0.065229	-2.9603	2.0083	6.2617	2.0083	3.3426	1.664	-6.581	1.7992	-0.041241	1.664	-7.2282	3.3429	-0.92532	0.048385	-4.726	3.1115	1.5769	0.18622	3.3014	-3.9214	-6.3029	-4.851	0.48641	0	3	1.4715	6903	545	2.8495	2.2637	0.25876	12.179
-6.5023	3.0058	-4.0001	2.8857	0.34656	2.0532	0.72595	3.017	1.6571	1.1464	-7.3008	1.9526	-2.2344	1.9958	4.3467	2.9169	-2.5809	0.31479	-2.9603	1.928	8.9579	1.928	5.0664	3.4455	-6.581	2.9431	0.93113	3.4455	-7.2282	6.2492	0.79851	0.51507	-4.726	5.7275	3.3007	0.61766	5.9976	-3.9214	-8.0268	-6.5748	0.48641	0	3	2.3434	60883	546	1.2822	1.1412	0.12356	2.4661
-6.5023	1.5551	-4.0001	1.4558	0.34656	1.5701	0.72595	1.4614	1.6571	1.1464	-5.577	2.1668	-2.2344	1.4607	4.3467	1.0603	-2.5809	0.052605	-2.9603	2.6006	7.2341	2.6006	3.3426	1.5734	-6.581	1.5399	0.93113	1.5734	-7.2282	3.5958	-0.92532	0.044691	-4.726	3.4192	1.5769	0.16226	4.2737	-3.9214	-6.3029	-4.851	0.48641	0	3	1.5593	8755	547	2.8334	2.254	0.25705	12.042
-6.5023	2.4863	-4.0001	2.3925	0.34656	2.1739	0.72595	3.5356	2.6295	1.1444	-7.3008	1.8311	-2.2344	2.1961	4.3467	2.0716	-2.5809	0.20624	-2.9603	2.1577	9.9303	2.1577	5.0664	3.0543	-6.581	2.4689	1.9035	3.0543	-7.2282	6.1542	0.79851	0.39707	-4.726	5.8205	3.3007	0.48872	6.97	-3.9214	-8.0268	-6.5748	0.48641	0	3	2.2606	60697	548	1.2798	1.1404	0.12222	2.4568
-6.5023	1.3136	-4.0001	1.3302	0.34656	1.6908	0.72595	1.9799	2.6295	1.3758	-5.577	2.1669	-2.2344	1.6244	4.3467	0.98649	-2.5809	0.044844	-2.9603	3.5233	8.2065	3.5233	3.3426	1.4577	-6.581	1.3109	1.9035	1.4577	-7.2282	3.9075	-0.92532	0.045039	-4.726	3.7724	1.5769	0.13995	5.2461	-3.9214	-6.3029	-4.851	0.48641	0	3	1.6429	10242	549	2.8272	2.2503	0.2564	11.99
-6.5023	1.1638	-4.0001	1.0935	0.34656	1.4493	0.72595	1.7725	2.6295	1.6029	-3.8531	1.9736	-2.2344	1.3977	4.3467	0.70006	-2.5809	0.04796	-2.9603	3.4892	6.4826	3.4892	1.6188	0.94112	-6.581	1.1599	1.9035	0.94112	-7.2282	3.4098	-2.6491	0.16599	-4.726	3.39	-0.14695	0.23365	3.5223	-3.9214	-4.5791	-3.1272	0.48641	0	4	1.5093	6003	550	5.1139	3.1703	0.61306	39.227
-6.5023	1.9759	-4.0001	1.9877	0.34656	2.2947	0.72595	4.0715	3.6019	1.6008	-7.3008	1.5725	-2.2344	2.4672	4.3467	1.6639	-2.5809	0.14662	-2.9603	3.128	10.903	3.128	5.0664	2.721	-6.581	1.9758	2.8759	2.721	-7.2282	6.0874	0.79851	0.27353	-4.726	5.944	3.3007	0.40044	7.9424	-3.9214	-8.0268	-6.5748	0.48641	0	3	2.2505	57510	551	1.2789	1.1401	0.12171	2.4533
-6.5023	1.1673	-4.0001	1.1185	0.34656	1.9324	0.72595	2.4985	3.6019	2.0594	-5.577	2.145	-2.2344	1.8459	4.3467	1.0157	-2.5809	0.040464	-2.9603	4.3716	9.1788	4.3716	3.3426	1.4741	-6.581	1.1703	2.8759	1.4741	-7.2282	4.1908	-0.92532	0.056514	-4.726	4.1094	1.5769	0.13237	6.2185	-3.9214	-6.3029	-4.851	0.48641	0	3	1.8202	11157	552	2.8249	2.2489	0.25615	11.97
-6.5023	0.91478	-4.0001	0.95834	0.34656	1.5701	0.72595	2.1873	3.6019	2.0594	-3.8531	1.8796	-2.2344	1.5043	4.3467	0.76502	-2.5809	0.048533	-2.9603	3.9578	7.455	3.9578	1.6188	0.89295	-6.581	0.91388	2.8759	0.89295	-7.2282	3.7243	-2.6491	0.23775	-4.726	3.7203	-0.14695	0.26914	4.4947	-3.9214	-4.5791	-3.1272	0.48641	0	3	1.5949	6654	553	5.1067	3.1621	0.61495	39.117
-6.5023	0.76931	-4.0001	0.73087	2.6197	1.3501	-6.9675	2.6749	-0.28768	2.4607	-3.8531	2.0709	0.038791	1.3606	6.6198	1.127	-2.5809	0.061602	7.0063	2.8806	3.5655	2.8806	3.8919	1.8264	-6.581	0.76695	6.6798	1.8264	0.46522	1.788	-2.6491	3.0678	2.9674	1.6472	-0.14695	3.0065	10.572	-3.9214	3.1144	-10.821	6.4175	1	2	1.6761	26635	554	1.4746	1.2939	0.13969	3.2618
-6.5023	1.1763	-4.0001	1.2302	2.6197	1.7124	-6.9675	3.2036	-0.28768	2.4607	-2.1293	3.07	0.038791	1.6982	6.6198	1.9312	-2.5809	0.069391	7.0063	4.9723	1.8416	4.9723	2.1681	1.7639	-6.581	1.1846	6.6798	1.7639	0.46522	2.443	-4.373	4.8244	2.9674	2.7866	-1.8708	4.7508	8.8479	-3.9214	4.8382	-9.0968	6.4175	0	1	2.1422	34735	555	1.4893	1.3078	0.13886	3.3272
-6.5023	1.9554	-4.0001	1.7812	2.6197	2.2731	-6.9675	4.0541	-0.28768	2.0021	-0.40546	4.8509	0.038791	2.2429	6.6198	3.2071	-2.5809	0.12126	7.0063	7.0584	0.11778	7.0584	0.44425	2.009	-6.581	1.9462	6.6798	2.009	0.46522	2.8607	-6.0968	6.5793	2.9674	3.2963	-3.5946	6.4936	7.1241	-3.9214	6.562	-7.373	6.4175	0	1	2.8195	39914	556	1.491	1.3083	0.13964	3.3348
-6.5023	0.91808	-4.0001	0.96816	2.6197	1.5485	-6.9675	2.9055	0.68471	1.4883	-2.1293	2.8372	0.038791	1.5181	6.6198	1.3989	-2.5809	0.063267	7.0063	3.7552	2.814	3.7552	2.1681	1.9922	-6.581	0.93158	7.6522	1.9922	0.46522	2.1696	-4.373	4.7996	2.9674	2.307	-1.8708	4.7218	9.8203	-3.9214	4.8382	-9.0968	6.4175	0	1	1.7776	29229	557	1.4892	1.3077	0.13879	3.3267
-6.5023	1.5542	-4.0001	1.4753	2.6197	1.9108	-6.9675	3.4319	0.68471	1.3736	-0.40546	4.9511	0.038791	1.9039	6.6198	2.4545	-2.5809	0.081449	7.0063	5.8479	1.0902	5.8479	0.44425	2.3856	-6.581	1.5482	7.6522	2.3856	0.46522	2.6229	-6.0968	6.5577	2.9674	3.0416	-3.5946	6.4806	8.0965	-3.9214	6.562	-7.373	6.4175	0	1	2.4495	38037	558	1.4904	1.3081	0.13935	3.3318
-6.5023	0.64571	-4.0001	0.70439	2.6197	1.4277	-6.9675	2.6022	1.6571	1.1465	-2.1293	2.5634	0.038791	1.402	6.6198	1.0645	-2.5809	0.059124	7.0063	2.725	3.7864	2.725	2.1681	2.3302	-6.581	0.64813	8.6246	2.3302	0.46522	1.8383	-4.373	4.741	2.9674	1.6787	-1.8708	4.6746	10.793	-3.9214	4.8382	-9.0968	6.4175	2	4	1.515	23120	559	1.4892	1.3077	0.13877	3.3265
-6.5023	1.1649	-4.0001	1.1731	2.6197	1.6693	-6.9675	3.1195	1.6571	1.2038	-0.40546	4.748	0.038791	1.6593	6.6198	1.7909	-2.5809	0.067217	7.0063	4.6904	2.0625	4.6904	0.44425	2.8669	-6.581	1.169	8.6246	2.8669	0.46522	2.356	-6.0968	6.5426	2.9674	2.6708	-3.5946	6.4672	9.0688	-3.9214	6.562	-7.373	6.4175	0	1	2.1798	33462	560	1.4901	1.308	0.13924	3.3307
-6.5023	0.89819	-4.0001	0.85695	2.6197	1.4709	-6.9675	2.8776	2.6295	1.0297	-0.40546	4.475	0.038791	1.4777	6.6198	1.2928	-2.5809	0.061367	7.0063	3.468	3.0349	3.468	0.44425	3.5221	-6.581	0.88553	9.597	3.5221	0.46522	2.0754	-6.0968	6.5097	2.9674	2.1618	-3.5946	6.4306	10.041	-3.9214	6.562	-7.373	6.4175	0	1	1.9347	27750	561	1.49	1.308	0.13919	3.3302
-6.5023	0.643	-4.0001	0.68334	2.6197	1.4277	-6.9675	2.4985	3.6019	1.3142	-0.40546	4.2929	0.038791	1.3963	6.6198	1.0282	-2.5809	0.058405	7.0063	2.5823	4.0073	2.5823	0.44425	4.133	-6.581	0.64032	10.569	4.133	0.46522	1.8157	-6.0968	6.4559	2.9674	1.6318	-3.5946	6.3961	11.014	-3.9214	6.562	-7.373	6.4175	2	4	1.8099	22189	562	1.49	1.3079	0.13918	3.3301
-6.5023	0.77535	-4.0001	0.80086	2.6197	1.4709	-5.0441	0.88624	-0.28768	2.5753	-5.577	1.3126	0.038791	1.444	6.6198	1.1338	-2.5809	0.049315	5.0829	1.1695	5.2893	1.1695	5.6158	1.5123	-6.581	0.7785	4.7565	1.5123	-1.4581	0.51876	-0.92532	0.32461	1.0441	0.52783	1.5769	0.28999	10.372	-3.9214	-0.53283	-10.621	6.1827	0	5	1.3035	6062	563	2.3781	1.8867	0.26046	8.4827
-6.5023	0.64465	-4.0001	0.66889	2.6197	1.4277	-5.0441	1.6122	-0.28768	2.6326	-3.8531	1.2121	0.038791	1.4315	6.6198	1.0904	-2.5809	0.031465	5.0829	1.8297	3.5655	1.8297	3.8919	1.4326	-6.581	0.64818	4.7565	1.4326	-1.4581	0.26699	-2.6491	1.2339	1.0441	0.27691	-0.14695	1.2026	8.6484	-3.9214	1.191	-8.8973	6.1827	2	6	1.3664	7079	564	3.2649	2.4484	0.33349	15.989
-6.5023	0.90053	-4.0001	0.84057	2.6197	1.4277	-5.0441	2.6493	-0.28768	2.1741	-2.1293	1.4715	0.038791	1.4308	6.6198	1.4877	-2.5809	0.033424	5.0829	2.9082	1.8416	2.9082	2.1681	1.2332	-6.581	0.89732	4.7565	1.2332	-1.4581	1.1055	-4.373	2.7208	1.0441	1.1449	-1.8708	2.6234	6.9246	-3.9214	2.9148	-7.1734	6.1827	0	1	1.5773	7871	565	3.4538	2.5526	0.35306	17.893
-6.5023	1.1735	-4.0001	1.1171	2.6197	1.5485	-5.0441	3.479	-0.28768	1.6582	-0.40546	2.3365	0.038791	1.5101	6.6198	2.2512	-2.5809	0.045906	5.0829	3.9346	0.11778	3.9346	0.44425	1.8209	-6.581	1.1695	4.7565	1.8209	-1.4581	1.687	-6.0968	4.5646	1.0441	1.7982	-3.5946	4.415	5.2007	-3.9214	4.6387	-5.4496	6.1827	0	1	1.8855	7871	566	3.4688	2.5576	0.35625	18.049
-6.5023	0.63992	-4.0001	0.57692	2.6197	1.3501	-5.0441	0.76723	0.68471	1.6029	-5.577	1.04	0.038791	1.3259	6.6198	0.92819	-2.5809	0.047306	5.0829	1.0074	6.2617	1.0074	5.6158	1.0901	-6.581	0.6364	5.7289	1.0901	-1.4581	0.49047	-0.92532	0.30926	1.0441	0.49714	1.5769	0.27919	11.345	-3.9214	-0.53283	-10.621	6.1827	2	8	0.99617	4891	567	2.378	1.8867	0.26044	8.4825
-6.5023	0.51242	-4.0001	0.51361	2.6197	1.4277	-5.0441	1.3011	0.68471	1.7749	-3.8531	1.0913	0.038791	1.4289	6.6198	0.96975	-2.5809	0.030318	5.0829	1.417	4.5379	1.417	3.8919	1.2956	-6.581	0.51657	5.7289	1.2956	-1.4581	0.26834	-2.6491	1.2089	1.0441	0.25655	-0.14695	1.195	9.6208	-3.9214	1.191	-8.8973	6.1827	2	6	1.1035	5366	568	3.2648	2.4483	0.33349	15.989
-6.5023	0.6474	-4.0001	0.68494	2.6197	1.4277	-5.0441	2.1308	0.68471	1.5456	-2.1293	1.4715	0.038791	1.3879	6.6198	1.1724	-2.5809	0.030316	5.0829	2.3164	2.814	2.3164	2.1681	1.3497	-6.581	0.64908	5.7289	1.3497	-1.4581	0.77062	-4.373	2.5561	1.0441	0.80852	-1.8708	2.498	7.8969	-3.9214	2.9148	-7.1734	6.1827	2	4	1.318	6770	569	3.4535	2.5523	0.35308	17.89
-6.5023	1.032	-4.0001	0.94696	2.6197	1.4709	-5.0441	2.8568	0.68471	1.1486	-0.40546	2.3553	0.038791	1.4881	6.6198	1.8773	-2.5809	0.039398	5.0829	3.341	1.0902	3.341	0.44425	1.9851	-6.581	1.0277	5.7289	1.9851	-1.4581	1.309	-6.0968	4.49	1.0441	1.3815	-3.5946	4.3686	6.1731	-3.9214	4.6387	-5.4496	6.1827	0	1	1.6351	8209	570	3.4668	2.5561	0.35631	18.029
-6.5023	0.38164	-4.0001	0.39319	2.6197	1.4007	-5.0441	1.2375	1.6571	1.2509	-3.8531	0.99854	0.038791	1.4268	6.6198	0.99064	-2.5809	0.023575	5.0829	1.2636	5.5102	1.2636	3.8919	1.3147	-6.581	0.38234	6.7012	1.3147	-1.4581	0.46946	-2.6491	1.1894	1.0441	0.45556	-0.14695	1.1807	10.593	-3.9214	1.191	-8.8973	6.1827	2	6	0.94376	37232	571	3.2648	2.4483	0.33349	15.988
-6.5023	0.46826	-4.0001	0.49828	2.6197	1.3209	-5.0441	1.9234	1.6571	1.1372	-2.1293	1.57	0.038791	1.305	6.6198	0.94701	-2.5809	0.024362	5.0829	1.8194	3.7864	1.8194	2.1681	1.7323	-6.581	0.46955	6.7012	1.7323	-1.4581	0.87371	-4.373	2.6134	1.0441	0.88976	-1.8708	2.585	8.8693	-3.9214	2.9148	-7.1734	6.1827	2	4	1.153	52107	572	3.4533	2.5522	0.35308	17.888
-6.5023	0.81556	-4.0001	0.79385	2.6197	1.3209	-5.0441	2.6092	1.6571	1.0993	-0.40546	2.7098	0.038791	1.3021	6.6198	1.2624	-2.5809	0.028874	5.0829	2.718	2.0625	2.718	0.44425	2.5064	-6.581	0.81129	6.7012	2.5064	-1.4581	1.2397	-6.0968	4.4682	1.0441	1.2881	-3.5946	4.3897	7.1455	-3.9214	4.6387	-5.4496	6.1827	0	1	1.5581	68971	573	3.4661	2.5555	0.35633	18.021
-6.5023	0.40547	-4.0001	0.40516	2.6197	1.4709	-5.0441	1.4048	2.6295	0.86194	-2.1293	1.6464	0.038791	1.4833	6.6198	0.98584	-2.5809	0.027475	5.0829	1.4401	4.7588	1.4401	2.1681	1.9106	-6.581	0.40348	7.6736	1.9106	-1.4581	0.42774	-4.373	2.2779	1.0441	0.42951	-1.8708	2.2825	9.8417	-3.9214	2.9148	-7.1734	6.1827	2	6	1.0324	3943	574	3.4533	2.5522	0.35309	17.888
-6.5023	0.64179	-4.0001	0.5988	2.6197	1.4277	-5.0441	1.9234	2.6295	0.91507	-0.40546	2.5587	0.038791	1.4029	6.6198	1.1307	-2.5809	0.030139	5.0829	2.1481	3.0349	2.1481	0.44425	2.5521	-6.581	0.63708	7.6736	2.5521	-1.4581	0.54094	-6.0968	4.069	1.0441	0.55881	-3.5946	4.0475	8.1179	-3.9214	4.6387	-5.4496	6.1827	2	6	1.3442	6407	575	3.4658	2.5553	0.35634	18.018
-6.5023	0.3842	-4.0001	0.37597	2.6197	1.5916	-5.0441	1.1974	3.6019	0.79831	-2.1293	1.6594	0.038791	1.587	6.6198	1.146	-2.5809	0.027003	5.0829	1.3141	5.7312	1.3141	2.1681	2.4516	-6.581	0.38615	8.646	2.4516	-1.4581	0.36229	-4.373	2.1824	1.0441	0.34408	-1.8708	2.2053	10.814	-3.9214	2.9148	-7.1734	6.1827	2	6	1.0012	2553	576	3.4533	2.5521	0.35308	17.887
-6.5023	0.50837	-4.0001	0.46532	2.6197	1.4709	-5.0441	1.6122	3.6019	1.0276	-0.40546	2.7911	0.038791	1.448	6.6198	1.0065	-2.5809	0.028135	5.0829	1.6698	4.0073	1.6698	0.44425	3.0113	-6.581	0.50548	8.646	3.0113	-1.4581	0.33461	-6.0968	3.8119	1.0441	0.34889	-3.5946	3.8056	9.0903	-3.9214	4.6387	-5.4496	6.1827	2	6	1.3126	5003	577	3.4657	2.5552	0.35634	18.017
-6.5023	1.0495	-4.0001	1.1113	2.6197	1.4709	-3.1208	2.0742	-0.28768	2.518	-7.3008	1.6679	0.038791	1.5001	6.6198	1.4746	-2.5809	0.09956	3.1596	2.1997	7.0131	2.1997	7.3396	2.9932	-6.581	1.0677	2.8331	2.9932	-3.3815	2.4623	0.79851	0.058627	-0.87932	2.63	3.3007	0.22382	10.173	-3.9214	-4.18	-10.422	5.2959	0	3	1.6486	38984	578	1.2665	1.1268	0.12401	2.4062
-6.5023	0.64254	-4.0001	0.66991	2.6197	1.3501	-3.1208	1.6594	-0.28768	2.346	-5.577	1.8185	0.038791	1.3319	6.6198	1.1238	-2.5809	0.035488	3.1596	1.5553	5.2893	1.5553	5.6158	2.141	-6.581	0.64697	2.8331	2.141	-3.3815	2.3335	-0.92532	0.097334	-0.87932	2.3259	1.5769	0.14792	8.4489	-3.9214	-2.4562	-8.6977	5.2959	2	6	1.4144	10481	579	2.7665	2.2005	0.25726	11.481
-6.5023	0.65207	-4.0001	0.67236	2.6197	1.5485	-3.1208	1.0371	-0.28768	2.5753	-3.8531	1.7856	0.038791	1.4963	6.6198	1.1671	-2.5809	0.021772	3.1596	1.3299	3.5655	1.3299	3.8919	1.8166	-6.581	0.65116	2.8331	1.8166	-3.3815	0.87983	-2.6491	0.39747	-0.87932	0.86428	-0.14695	0.42808	6.725	-3.9214	-0.73237	-6.9739	5.2959	2	6	1.3785	5310	580	4.7718	2.994	0.59382	34.156
-6.5023	0.77884	-4.0001	0.73859	2.6197	1.3069	-3.1208	1.7631	-0.28768	2.1167	-2.1293	0.90758	0.038791	1.2448	6.6198	1.0899	-2.5809	0.021314	3.1596	1.6284	1.8416	1.6284	2.1681	0.97327	-6.581	0.77197	2.8331	0.97327	-3.3815	0.54654	-4.373	0.92831	-0.87932	0.59579	-1.8708	0.89874	5.0012	-3.9214	0.99147	-5.2501	5.2959	1	4	1.2686	5827	581	5.7054	3.1608	0.80506	48.827
-6.5023	0.90997	-4.0001	0.8627	2.6197	1.1085	-3.1208	2.3854	-0.28768	1.1423	-0.40546	1.0042	0.038791	1.1083	6.6198	1.2438	-2.5809	0.03534	3.1596	2.2424	0.11778	2.2424	0.44425	1.1096	-6.581	0.90186	2.8331	1.1096	-3.3815	0.9931	-6.0968	2.4112	-0.87932	1.0426	-3.5946	2.3298	3.2773	-3.9214	2.7153	-3.5262	5.2959	0	1	1.2355	4783	582	5.8269	3.1897	0.82677	50.929
-6.5023	0.77953	-4.0001	0.86685	2.6197	1.3501	-3.1208	1.9705	0.68471	1.5456	-7.3008	1.8234	0.038791	1.3618	6.6198	1.0884	-2.5809	0.083513	3.1596	1.8609	7.9855	1.8609	7.3396	2.3127	-6.581	0.79059	3.8055	2.3127	-3.3815	2.2917	0.79851	0.044287	-0.87932	2.4787	3.3007	0.20525	11.145	-3.9214	-4.18	-10.422	5.2959	0	3	1.3893	30711	583	1.2665	1.1268	0.124	2.406
-6.5023	0.51446	-4.0001	0.53228	2.6197	1.3501	-3.1208	1.5557	0.68471	1.6029	-5.577	1.6345	0.038791	1.3261	6.6198	0.97599	-2.5809	0.03506	3.1596	1.5408	6.2617	1.5408	5.6158	1.7938	-6.581	0.51731	3.8055	1.7938	-3.3815	2.2938	-0.92532	0.15434	-0.87932	2.3025	1.5769	0.16582	9.4212	-3.9214	-2.4562	-8.6977	5.2959	2	6	1.1983	8880	584	2.7665	2.2004	0.25726	11.48
-6.5023	0.51568	-4.0001	0.51925	2.6197	1.5916	-3.1208	0.93342	0.68471	1.8895	-3.8531	1.5976	0.038791	1.5707	6.6198	1.0033	-2.5809	0.020096	3.1596	1.2551	4.5379	1.2551	3.8919	1.4854	-6.581	0.51772	3.8055	1.4854	-3.3815	0.88891	-2.6491	0.5275	-0.87932	0.87841	-0.14695	0.5509	7.6974	-3.9214	-0.73237	-6.9739	5.2959	2	6	1.1745	4070	585	4.7715	2.9936	0.5939	34.151
-6.5023	0.64669	-4.0001	0.61171	2.6197	1.3501	-3.1208	1.452	0.68471	1.5456	-2.1293	0.8136	0.038791	1.3522	6.6198	0.98842	-2.5809	0.017066	3.1596	1.2757	2.814	1.2757	2.1681	1.0325	-6.581	0.6398	3.8055	1.0325	-3.3815	0.38958	-4.373	0.9204	-0.87932	0.41289	-1.8708	0.89616	5.9736	-3.9214	0.99147	-5.2501	5.2959	2	6	1.0699	5292	586	5.7039	3.1588	0.80571	48.801
-6.5023	0.78457	-4.0001	0.78345	2.6197	1.1862	-3.1208	2.1779	0.68471	1.0297	-0.40546	1.0982	0.038791	1.1251	6.6198	1.0967	-2.5809	0.02483	3.1596	1.8893	1.0902	1.8893	0.44425	1.2384	-6.581	0.78356	3.8055	1.2384	-3.3815	0.84602	-6.0968	2.3908	-0.87932	0.89901	-3.5946	2.3256	4.2497	-3.9214	2.7153	-3.5262	5.2959	0	1	1.1767	5702	587	5.8188	3.1788	0.8305	50.788
-6.5023	0.40547	-4.0001	0.42449	2.6197	1.4277	-3.1208	1.5557	1.6571	1.2038	-5.577	1.4439	0.038791	1.3943	6.6198	0.9739	-2.5809	0.034822	3.1596	1.6191	7.2341	1.6191	5.6158	1.5914	-6.581	0.40332	4.7779	1.5914	-3.3815	2.2601	-0.92532	0.27493	-0.87932	2.2803	1.5769	0.245	10.394	-3.9214	-2.4562	-8.6977	5.2959	2	6	1.0768	6795	588	2.7664	2.2004	0.25725	11.48
-6.5023	0.40547	-4.0001	0.40951	2.6197	1.5916	-3.1208	0.93342	1.6571	1.2611	-3.8531	1.5037	0.038791	1.608	6.6198	1.0087	-2.5809	0.020044	3.1596	1.2763	5.5102	1.2763	3.8919	1.2442	-6.581	0.40467	4.7779	1.2442	-3.3815	0.89482	-2.6491	0.64127	-0.87932	0.88871	-0.14695	0.63877	8.6698	-3.9214	-0.73237	-6.9739	5.2959	2	6	1.0175	2832	589	4.7714	2.9935	0.59393	34.15
-6.5023	0.51011	-4.0001	0.49068	2.6197	1.4709	-3.1208	1.1408	1.6571	1.2038	-2.1293	0.71962	0.038791	1.4727	6.6198	0.96369	-2.5809	0.014268	3.1596	1.0569	3.7864	1.0569	2.1681	1.1572	-6.581	0.50596	4.7779	1.1572	-3.3815	0.27465	-4.373	0.8758	-0.87932	0.29014	-1.8708	0.86112	6.946	-3.9214	0.99147	-5.2501	5.2959	3	7	0.92265	4214	590	5.7033	3.1581	0.80595	48.791
-6.5023	0.65319	-4.0001	0.66786	2.6197	1.2293	-3.1208	1.7631	1.6571	1.0891	-0.40546	1.1922	0.038791	1.2302	6.6198	1.0006	-2.5809	0.019523	3.1596	1.5156	2.0625	1.5156	0.44425	1.5557	-6.581	0.65171	4.7779	1.5557	-3.3815	0.66197	-6.0968	2.3372	-0.87932	0.69787	-3.5946	2.2869	5.2221	-3.9214	2.7153	-3.5262	5.2959	2	6	1.0991	5936	591	5.8158	3.1747	0.83193	50.735
-6.5023	0.40547	-4.0001	0.36793	2.6197	1.4709	-3.1208	1.5557	2.6295	0.86194	-5.577	1.2557	0.038791	1.4464	6.6198	1.0597	-2.5809	0.035367	3.1596	1.7796	8.2065	1.7796	5.6158	1.4139	-6.581	0.40206	5.7503	1.4139	-3.3815	2.1419	-0.92532	0.37831	-0.87932	2.1712	1.5769	0.34195	11.366	-3.9214	-2.4562	-8.6977	5.2959	2	6	0.98627	4798	592	2.7664	2.2004	0.25725	11.479
-6.5023	0.38686	-4.0001	0.38646	2.6197	1.7124	-3.1208	0.9334	2.6295	0.80042	-3.8531	1.4097	0.038791	1.7029	6.6198	1.2279	-2.5809	0.020135	3.1596	1.4443	6.4826	1.4443	3.8919	1.0637	-6.581	0.38672	5.7503	1.0637	-3.3815	0.89568	-2.6491	0.70402	-0.87932	0.89608	-0.14695	0.68518	9.6422	-3.9214	-0.73237	-6.9739	5.2959	2	6	0.93821	1774	593	4.7714	2.9934	0.59396	34.149
-6.5023	0.40547	-4.0001	0.39467	2.6197	1.5916	-3.1208	0.82968	2.6295	0.80462	-2.1293	0.71962	0.038791	1.5988	6.6198	1.0879	-2.5809	0.012827	3.1596	0.91346	4.7588	0.91347	2.1681	1.2711	-6.581	0.40367	5.7503	1.2711	-3.3815	0.1891	-4.373	0.85391	-0.87932	0.20042	-1.8708	0.84971	7.9184	-3.9214	0.99147	-5.2501	5.2959	3	7	0.79095	2852	594	5.7031	3.1578	0.80605	48.788
-6.5023	0.51901	-4.0001	0.52934	2.6197	1.3501	-3.1208	1.452	2.6295	0.91507	-0.40546	1.2862	0.038791	1.3452	6.6198	0.93841	-2.5809	0.015167	3.1596	1.167	3.0349	1.167	0.44425	2.0189	-6.581	0.51881	5.7503	2.0189	-3.3815	0.50508	-6.0968	2.2591	-0.87932	0.51812	-3.5946	2.2285	6.1945	-3.9214	2.7153	-3.5262	5.2959	2	6	1.0086	5128	595	5.8146	3.1731	0.83247	50.715
-6.5023	0.27393	-4.0001	0.27883	2.6197	1.954	-3.1208	0.8297	3.6019	0.5117	-3.8531	1.1616	0.038791	1.9316	6.6198	1.6046	-2.5809	0.021034	3.1596	1.8974	7.455	1.8974	3.8919	0.9512	-6.581	0.27213	6.7226	0.95121	-3.3815	0.86768	-2.6491	0.66848	-0.87932	0.87528	-0.14695	0.64857	10.615	-3.9214	-0.73237	-6.9739	5.2959	3	7	0.83496	1011	596	4.7714	2.9934	0.59394	34.149
-6.5023	0.38446	-4.0001	0.37734	2.6197	1.8332	-3.1208	0.62226	3.6019	0.62635	-2.1293	0.71962	0.038791	1.8311	6.6198	1.4854	-2.5809	0.014548	3.1596	1.0205	5.7312	1.0205	2.1681	1.6717	-6.581	0.38621	6.7226	1.6717	-3.3815	0.16907	-4.373	0.84224	-0.87932	0.18636	-1.8708	0.8433	8.8907	-3.9214	0.99147	-5.2501	5.2959	5	9	0.76054	1713	597	5.703	3.1577	0.80609	48.787
-6.5023	0.40547	-4.0001	0.41048	2.6197	1.4709	-3.1208	1.0371	3.6019	0.97029	-0.40546	1.4741	0.038791	1.477	6.6198	0.98519	-2.5809	0.013252	3.1596	0.97667	4.0073	0.97667	0.44425	2.5096	-6.581	0.40524	6.7226	2.5096	-3.3815	0.37063	-6.0968	2.1604	-0.87932	0.37797	-3.5946	2.1511	7.1669	-3.9214	2.7153	-3.5262	5.2959	2	6	0.96139	3886	598	5.8142	3.1725	0.83269	50.707
-6.5023	1.8312	-4.0001	1.8282	2.6197	2.0316	-1.1974	2.3288	-0.28768	2.346	-7.3008	1.561	0.038791	2.0358	6.6198	2.8412	-2.5809	0.13299	1.2362	2.2356	7.0131	2.2356	7.3396	4.5179	-6.581	1.8294	0.90975	4.5179	-5.3049	4.0711	0.79851	0.20414	-2.8027	3.9603	3.3007	0.34066	8.2493	-3.9214	-6.1034	-8.4982	3.6999	0	3	1.9878	53905	599	1.2698	1.1288	0.12486	2.4185
-6.5023	1.0428	-4.0001	1.0424	2.6197	1.4709	-1.1974	1.6028	-0.28768	1.9448	-5.577	2.1509	0.038791	1.4607	6.6198	1.8672	-2.5809	0.041955	1.2362	1.6257	5.2893	1.6257	5.6158	2.8204	-6.581	1.0443	0.90975	2.8204	-5.3049	2.3609	-0.92532	0.057522	-2.8027	2.2605	1.5769	0.1548	6.5255	-3.9214	-4.3795	-6.7744	3.6999	0	3	1.5424	10855	600	2.801	2.2182	0.26272	11.768
-6.5023	0.90459	-4.0001	0.88901	2.6197	1.241	-1.1974	1.3001	-0.28768	1.6794	-3.8531	1.8644	0.038791	1.2478	6.6198	1.3917	-2.5809	0.028319	1.2362	1.0458	3.5655	1.0458	3.8919	1.9655	-6.581	0.90596	0.90975	1.9655	-5.3049	1.7995	-2.6491	0.20764	-2.8027	1.7651	-0.14695	0.2896	4.8017	-3.9214	-2.6557	-5.0506	3.6999	0	3	1.3131	47589	601	5.0258	3.0557	0.64473	37.888
-6.5023	1.4242	-4.0001	1.4413	2.6197	1.7124	-1.1974	2.5593	0.68471	1.5456	-7.3008	1.463	0.038791	1.7122	6.6198	2.0566	-2.5809	0.11482	1.2362	2.1762	7.9855	2.1762	7.3396	3.7781	-6.581	1.4099	1.8821	3.7781	-5.3049	3.9454	0.79851	0.092943	-2.8027	3.9527	3.3007	0.25115	9.2217	-3.9214	-6.1034	-8.4982	3.6999	0	3	1.691	47761	602	1.2695	1.1287	0.12473	2.4175
-6.5023	0.90635	-4.0001	0.90105	2.6197	1.4277	-1.1974	1.7159	0.68471	1.2632	-5.577	2.0718	0.038791	1.3831	6.6198	1.4383	-2.5809	0.038992	1.2362	1.7205	6.2617	1.7205	5.6158	2.5299	-6.581	0.90986	1.8821	2.5299	-5.3049	2.6581	-0.92532	0.08738	-2.8027	2.5983	1.5769	0.17471	7.4979	-3.9214	-4.3795	-6.7744	3.6999	0	3	1.381	10545	603	2.8003	2.2178	0.26266	11.763
-6.5023	0.90452	-4.0001	0.85286	2.6197	1.4277	-1.1974	1.3011	0.68471	1.3205	-3.8531	1.9736	0.038791	1.3779	6.6198	1.2663	-2.5809	0.022788	1.2362	1.2375	4.5379	1.2375	3.8919	1.9627	-6.581	0.89929	1.8821	1.9627	-5.3049	2.1672	-2.6491	0.47911	-2.8027	2.1251	-0.14695	0.5339	5.7741	-3.9214	-2.6557	-5.0506	3.6999	0	3	1.2967	5322	604	5.0237	3.0533	0.64534	37.857
-6.5023	0.40547	-4.0001	0.40725	2.6197	0.86699	-1.1974	0.98058	0.68471	1.0339	-2.1293	0.90758	0.038791	0.86844	6.6198	0.70936	-2.5809	0.019716	1.2362	0.87863	2.814	0.87863	2.1681	0.91428	-6.581	0.40429	1.8821	0.91428	-5.3049	0.74505	-4.373	0.26128	-2.8027	0.74535	-1.8708	0.28622	4.0502	-3.9214	-0.93188	-3.3267	3.6999	2	9	0.76696	7325	605	6.4445	3.2447	0.98615	62.298
-6.5023	1.0378	-4.0001	1.0726	2.6197	1.4709	-1.1974	2.5823	1.6571	1.2038	-7.3008	1.6471	0.038791	1.4693	6.6198	1.4112	-2.5809	0.089912	1.2362	2.1532	8.9579	2.1532	7.3396	2.9235	-6.581	1.0382	2.8545	2.9235	-5.3049	3.7677	0.79851	0.056066	-2.8027	3.8249	3.3007	0.20613	10.194	-3.9214	-6.1034	-8.4982	3.6999	0	3	1.5024	39444	606	1.2694	1.1287	0.12467	2.4172
-6.5023	0.77327	-4.0001	0.73447	2.6197	1.3501	-1.1974	1.9234	1.6571	1.1465	-5.577	1.9748	0.038791	1.3551	6.6198	1.1065	-2.5809	0.037259	1.2362	1.9337	7.2341	1.9337	5.6158	2.1419	-6.581	0.76823	2.8545	2.1419	-5.3049	2.9251	-0.92532	0.13701	-2.8027	2.8937	1.5769	0.19542	8.4703	-3.9214	-4.3795	-6.7744	3.6999	1	4	1.3171	9388	607	2.8001	2.2176	0.26264	11.761
-6.5023	0.64906	-4.0001	0.66898	2.6197	1.4709	-1.1974	1.4048	1.6571	1.1464	-3.8531	1.8796	0.038791	1.4706	6.6198	1.0549	-2.5809	0.019391	1.2362	1.5029	5.5102	1.5029	3.8919	1.705	-6.581	0.65005	2.8545	1.705	-5.3049	2.3063	-2.6491	0.65773	-2.8027	2.2863	-0.14695	0.68618	6.7464	-3.9214	-2.6557	-5.0506	3.6999	2	6	1.2033	4629	608	5.023	3.0524	0.64558	37.845
-6.5023	0.38723	-4.0001	0.38191	2.6197	1.0654	-1.1974	0.87686	1.6571	1.0318	-2.1293	0.71962	0.038791	1.0082	6.6198	0.75013	-2.5809	0.018233	1.2362	0.89206	3.7864	0.89206	2.1681	0.89607	-6.581	0.3868	2.8545	0.89607	-5.3049	0.76051	-4.373	0.25555	-2.8027	0.75679	-1.8708	0.2767	5.0226	-3.9214	-0.93188	-3.3267	3.6999	3	7	0.74381	7077	609	6.4412	3.2397	0.98817	62.233
-6.5023	0.27505	-4.0001	0.33503	2.6197	0.74622	-1.1974	1.0843	1.6571	0.85985	-0.40546	0.44035	0.038791	0.75674	6.6198	0.52651	-2.5809	0.031747	1.2362	0.7681	2.0625	0.7681	0.44425	1.2645	-6.581	0.28016	2.8545	1.2645	-5.3049	0.70817	-6.0968	0.80822	-2.8027	0.70375	-3.5946	0.82507	3.2988	-3.9214	0.79197	-1.6029	3.6999	4	9	0.62346	6380	610	6.8092	3.3146	1.0543	69.548
-6.5023	0.77022	-4.0001	0.84496	2.6197	1.3501	-1.1974	2.7531	2.6295	0.97659	-7.3008	1.7344	0.038791	1.35	6.6198	1.0835	-2.5809	0.077544	1.2362	2.6648	9.9303	2.6648	7.3396	2.2832	-6.581	0.77326	3.8269	2.2832	-5.3049	3.7019	0.79851	0.047092	-2.8027	3.8052	3.3007	0.18983	11.166	-3.9214	-6.1034	-8.4982	3.6999	0	3	1.4049	31536	611	1.2694	1.1287	0.12465	2.417
-6.5023	0.51495	-4.0001	0.5736	2.6197	1.3501	-1.1974	2.2345	2.6295	0.91927	-5.577	1.779	0.038791	1.3439	6.6198	0.95067	-2.5809	0.036284	1.2362	2.4748	8.2065	2.4748	5.6158	1.7946	-6.581	0.51747	3.8269	1.7946	-5.3049	3.2143	-0.92532	0.22132	-2.8027	3.2105	1.5769	0.23419	9.4427	-3.9214	-4.3795	-6.7744	3.6999	2	6	1.2286	7752	612	2.8	2.2176	0.26263	11.76
-6.5023	0.51105	-4.0001	0.49793	2.6197	1.5916	-1.1974	1.6122	2.6295	0.86194	-3.8531	1.7856	0.038791	1.5631	6.6198	0.97609	-2.5809	0.016922	1.2362	2.0766	6.4826	2.0766	3.8919	1.4559	-6.581	0.50622	3.8269	1.4559	-5.3049	2.4336	-2.6491	0.8695	-2.8027	2.4216	-0.14695	0.89115	7.7188	-3.9214	-2.6557	-5.0506	3.6999	2	4	1.1434	3437	613	5.0227	3.0521	0.64566	37.841
-6.5023	0.3842	-4.0001	0.36748	2.6197	1.3501	-1.1974	0.78252	2.6295	0.86194	-2.1293	0.63325	0.038791	1.3156	6.6198	0.90588	-2.5809	0.016727	1.2362	1.0164	4.7588	1.0164	2.1681	0.97051	-6.581	0.38615	3.8269	0.97052	-5.3049	0.79191	-4.373	0.24744	-2.8027	0.7885	-1.8708	0.26966	5.995	-3.9214	-0.93188	-3.3267	3.6999	3	7	0.72991	5943	614	6.4399	3.2378	0.98895	62.208
-6.5023	0.27442	-4.0001	0.30759	2.6197	0.98776	-1.1974	0.87686	2.6295	0.91927	-0.40546	0.53433	0.038791	0.94924	6.6198	0.67059	-2.5809	0.033832	1.2362	0.81641	3.0349	0.81641	0.44425	1.4888	-6.581	0.27409	3.8269	1.4888	-5.3049	0.59573	-6.0968	0.84249	-2.8027	0.60437	-3.5946	0.86482	4.2712	-3.9214	0.79197	-1.6029	3.6999	3	8	0.65004	6599	615	6.8024	3.3042	1.0587	69.41
-6.5023	0.40547	-4.0001	0.42206	2.6197	1.4277	-1.1974	2.6493	3.6019	1.0849	-5.577	1.545	0.038791	1.3963	6.6198	0.94759	-2.5809	0.03548	1.2362	3.1339	9.1788	3.1339	5.6158	1.5399	-6.581	0.40094	4.7993	1.5399	-5.3049	3.4846	-0.92532	0.34851	-2.8027	3.5251	1.5769	0.3163	10.415	-3.9214	-4.3795	-6.7744	3.6999	2	6	1.2558	5847	616	2.7999	2.2176	0.26263	11.76
-6.5023	0.40547	-4.0001	0.40605	2.6197	1.7124	-1.1974	1.7159	3.6019	0.85564	-3.8531	1.6916	0.038791	1.6867	6.6198	1.0276	-2.5809	0.016303	1.2362	2.8105	7.455	2.8105	3.8919	1.1303	-6.581	0.40494	4.7993	1.1303	-5.3049	2.4815	-2.6491	0.98746	-2.8027	2.4799	-0.14695	0.98937	8.6912	-3.9214	-2.6557	-5.0506	3.6999	2	4	1.1312	2311	617	5.0226	3.052	0.64569	37.839
-6.5023	0.27398	-4.0001	0.28137	2.6197	1.5916	-1.1974	0.78252	3.6019	0.74099	-2.1293	0.56083	0.038791	1.5702	6.6198	1.2959	-2.5809	0.018254	1.2362	1.4099	5.7312	1.4099	2.1681	1.0585	-6.581	0.27322	4.7993	1.0585	-5.3049	0.82048	-4.373	0.26442	-2.8027	0.82806	-1.8708	0.28359	6.9674	-3.9214	-0.93188	-3.3267	3.6999	4	8	0.70522	4091	618	6.4394	3.2371	0.98924	62.199
-6.5023	0.27433	-4.0001	0.3003	2.6197	1.3501	-1.1974	0.67881	3.6019	1.0849	-0.40546	0.62831	0.038791	1.2921	6.6198	0.97926	-2.5809	0.038463	1.2362	0.76859	4.0073	0.76859	0.44425	1.8677	-6.581	0.27244	4.7993	1.8677	-5.3049	0.48077	-6.0968	0.91826	-2.8027	0.49483	-3.5946	0.95253	5.2435	-3.9214	0.79197	-1.6029	3.6999	4	8	0.71946	5482	619	6.7999	3.3002	1.0604	69.358
-6.5023	2.7603	-4.0001	2.6222	2.6197	2.7562	0.72595	3.1208	-0.28768	1.6582	-7.3008	1.9332	0.038791	2.9593	6.6198	4.7036	-2.5809	0.24387	-0.68716	0.64915	7.0131	0.64915	7.3396	5.4805	-6.581	2.7311	-1.0136	5.4805	-7.2282	6.0749	0.79851	0.41979	-4.726	5.5874	3.3007	0.51651	6.326	-3.9214	-8.0268	-6.5748	1.9577	0	5	2.4751	57533	620	1.2723	1.1296	0.12626	2.428
-6.5023	1.4388	-4.0001	1.3725	2.6197	1.6693	0.72595	1.5651	-0.28768	1.3142	-5.577	2.1728	0.038791	1.6342	6.6198	2.8314	-2.5809	0.055948	-0.68716	1.65	5.2893	1.65	5.6158	3.5125	-6.581	1.4382	-1.0136	3.5125	-7.2282	3.6333	-0.92532	0.043267	-4.726	3.4409	1.5769	0.16773	4.6021	-3.9214	-6.3029	-4.851	1.9577	0	3	1.5888	8924	621	2.8081	2.2221	0.26371	11.829
-6.5023	2.2393	-4.0001	2.1656	2.6197	2.3939	0.72595	3.6393	0.68471	1.2017	-7.3008	1.7681	0.038791	2.4757	6.6198	3.6538	-2.5809	0.15581	-0.68716	0.98451	7.9855	0.98451	7.3396	5.0242	-6.581	2.2398	-0.041241	5.0242	-7.2282	6.0143	0.79851	0.30839	-4.726	5.7148	3.3007	0.41508	7.2984	-3.9214	-8.0268	-6.5748	1.9577	0	3	2.2346	56931	622	1.2705	1.1291	0.12529	2.4213
-6.5023	1.2967	-4.0001	1.2177	2.6197	1.5485	0.72595	2.0836	0.68471	1.0297	-5.577	2.164	0.038791	1.5232	6.6198	2.3303	-2.5809	0.047229	-0.68716	1.9685	6.2617	1.9685	5.6158	3.171	-6.581	1.2905	-0.041241	3.171	-7.2282	3.9414	-0.92532	0.046603	-4.726	3.8033	1.5769	0.15647	5.5745	-3.9214	-6.3029	-4.851	1.9577	0	3	1.5567	10261	623	2.8037	2.2194	0.26329	11.791
-6.5023	1.1793	-4.0001	1.1276	2.6197	1.3501	0.72595	1.7725	0.68471	0.91506	-3.8531	2.0675	0.038791	1.3265	6.6198	1.8353	-2.5809	0.045083	-0.68716	1.7939	4.5379	1.7939	3.8919	2.3516	-6.581	1.1765	-0.041241	2.3516	-7.2282	3.4678	-2.6491	0.20787	-4.726	3.403	-0.14695	0.31227	3.8507	-3.9214	-4.5791	-3.1272	1.9577	0	3	1.402	4998	624	5.0413	3.0632	0.64579	38.122
-6.5023	1.8222	-4.0001	1.7611	2.6197	1.954	0.72595	4.2616	1.6571	1.1464	-7.3008	1.5581	0.038791	2.0225	6.6198	2.8181	-2.5809	0.1309	-0.68716	1.5519	8.9579	1.5519	7.3396	4.4957	-6.581	1.8168	0.93113	4.4957	-7.2282	5.974	0.79851	0.18908	-4.726	5.8477	3.3007	0.33075	8.2707	-3.9214	-8.0268	-6.5748	1.9577	0	3	2.0839	53501	625	1.2699	1.1288	0.12493	2.4188
-6.5023	1.0431	-4.0001	1.0652	2.6197	1.4709	0.72595	2.7059	1.6571	1.0891	-5.577	2.1074	0.038791	1.4366	6.6198	1.8517	-2.5809	0.042072	-0.68716	2.4072	7.2341	2.4072	5.6158	2.8395	-6.581	1.0446	0.93113	2.8395	-7.2282	4.2923	-0.92532	0.058578	-4.726	4.1827	1.5769	0.16192	6.5469	-3.9214	-6.3029	-4.851	1.9577	0	3	1.5803	10823	626	2.802	2.2183	0.26313	11.777
-6.5023	1.0414	-4.0001	0.99657	2.6197	1.3501	0.72595	2.1873	1.6571	0.97449	-3.8531	2.0675	0.038791	1.3552	6.6198	1.5796	-2.5809	0.03311	-0.68716	2.0905	5.5102	2.0905	3.8919	2.1711	-6.581	1.0372	0.93113	2.1711	-7.2282	3.765	-2.6491	0.29507	-4.726	3.7118	-0.14695	0.37556	4.8231	-3.9214	-4.5791	-3.1272	1.9577	0	3	1.4362	5632	627	5.0361	3.057	0.64741	38.043
-6.5023	1.3158	-4.0001	1.3938	2.6197	1.6693	0.72595	4.4897	2.6295	1.0297	-7.3008	1.4756	0.038791	1.6905	6.6198	2.0278	-2.5809	0.11389	-0.68716	2.5159	9.9303	2.5159	7.3396	3.7642	-6.581	1.3351	1.9035	3.7642	-7.2282	5.8717	0.79851	0.091531	-4.726	5.8782	3.3007	0.2489	9.2431	-3.9214	-8.0268	-6.5748	1.9577	0	3	1.8956	47409	628	1.2696	1.1287	0.12479	2.4179
-6.5023	0.90661	-4.0001	0.90518	2.6197	1.4277	0.72595	3.3282	2.6295	1.087	-5.577	2.0754	0.038791	1.384	6.6198	1.4109	-2.5809	0.038918	-0.68716	3.0763	8.2065	3.0763	5.6158	2.4787	-6.581	0.90986	1.9035	2.4787	-7.2282	4.5946	-0.92532	0.090426	-4.726	4.5309	1.5769	0.17617	7.5193	-3.9214	-6.3029	-4.851	1.9577	0	3	1.6217	10486	629	2.8014	2.2179	0.26306	11.772
-6.5023	0.90428	-4.0001	0.8422	2.6197	1.4277	0.72595	2.7059	2.6295	0.97659	-3.8531	1.9736	0.038791	1.3819	6.6198	1.2971	-2.5809	0.023091	-0.68716	2.586	6.4826	2.586	3.8919	1.9873	-6.581	0.89923	1.9035	1.9873	-7.2282	4.0967	-2.6491	0.51163	-4.726	4.0512	-0.14695	0.56295	5.7955	-3.9214	-4.5791	-3.1272	1.9577	0	3	1.4717	5381	630	5.0341	3.0546	0.64801	38.013
-6.5023	0.40547	-4.0001	0.39607	2.6197	0.84167	0.72595	1.3091	2.6295	1.1125	-2.1293	0.94851	0.038791	0.82353	6.6198	0.65062	-2.5809	0.02206	-0.68716	1.901	4.7588	1.901	2.1681	0.8817	-6.581	0.40335	1.9035	0.8817	-7.2282	1.8823	-4.373	0.30013	-4.726	1.8623	-1.8708	0.31873	4.0716	-3.9214	-2.8553	-1.4034	1.9577	2	7	0.83556	56859	631	6.507	3.2595	0.99631	63.512
-6.5023	0.99255	-4.0001	1.0672	2.6197	1.4745	0.72595	4.6264	3.6019	1.4141	-7.3008	1.7601	0.038791	1.4658	6.6198	1.4232	-2.5809	0.093752	-0.68716	3.7031	10.903	3.7031	7.3396	3.0011	-6.581	1.0067	2.8759	3.0011	-7.2282	5.7733	0.79851	0.062773	-4.726	5.8459	3.3007	0.21647	10.216	-3.9214	-8.0268	-6.5748	1.9577	0	3	1.8891	301000	632	1.2695	1.1287	0.12474	2.4175
-6.5023	0.77345	-4.0001	0.73421	2.6197	1.3501	0.72595	3.743	3.6019	1.4862	-5.577	1.9561	0.038791	1.3616	6.6198	1.1144	-2.5809	0.037096	-0.68716	3.6988	9.1788	3.6988	5.6158	2.1177	-6.581	0.76831	2.8759	2.1177	-7.2282	4.8321	-0.92532	0.1339	-4.726	4.7942	1.5769	0.19315	8.4917	-3.9214	-6.3029	-4.851	1.9577	1	4	1.6738	9477	633	2.8011	2.2178	0.26304	11.77
-6.5023	0.64868	-4.0001	0.66871	2.6197	1.4709	0.72595	3.017	3.6019	1.1996	-3.8531	1.8796	0.038791	1.4707	6.6198	1.0834	-2.5809	0.019573	-0.68716	3.2371	7.455	3.2371	3.8919	1.7373	-6.581	0.64989	2.8759	1.7373	-7.2282	4.2358	-2.6491	0.68141	-4.726	4.1918	-0.14695	0.70786	6.7678	-3.9214	-4.5791	-3.1272	1.9577	2	6	1.4807	4650	634	5.0333	3.0537	0.64824	38.001
-6.5023	0.38628	-4.0001	0.37593	2.6197	1.0654	0.72595	1.5651	3.6019	1.4862	-2.1293	0.8136	0.038791	1.0188	6.6198	0.72817	-2.5809	0.021481	-0.68716	2.3017	5.7312	2.3018	2.1681	0.89858	-6.581	0.3866	2.8759	0.89858	-7.2282	2.0637	-4.373	0.25452	-4.726	2.0531	-1.8708	0.27352	5.044	-3.9214	-2.8553	-1.4034	1.9577	2	7	0.94875	7130	635	6.5038	3.2546	0.99831	63.449
-6.5023	0.27498	-4.0001	0.31675	2.6197	0.50467	0.72595	0.94281	3.6019	1.7728	-0.40546	0.44035	0.038791	0.52124	6.6198	0.37203	-2.5809	0.085004	-0.68716	1.3071	4.0073	1.3071	0.44425	0.78361	-6.581	0.2738	2.8759	0.78361	-7.2282	1.2534	-6.0968	0.80409	-4.726	1.3368	-3.5946	0.87877	3.3202	-3.9214	-1.1314	0.32049	1.9577	4	8	0.70873	4407	636	7.0286	3.4447	1.0404	74.103
-6.5023	0.64219	-4.0001	0.64723	4.8928	1.6477	-6.9675	2.4881	-0.28768	2.6326	-2.1293	2.5913	2.3119	1.6591	8.8929	2.6056	-2.5809	0.059026	9.2794	4.7573	1.8416	4.7573	4.4412	1.8772	-6.581	0.6375	6.6798	1.8772	0.46522	1.8102	-4.373	4.7332	2.9674	1.6187	-1.8708	4.6731	11.121	-3.9214	4.8382	-9.0968	8.6892	2	4	1.7749	21342	637	1.4881	1.3073	0.13829	3.3216
-6.5023	1.0414	-4.0001	1.0572	4.8928	2.4931	-6.9675	3.017	-0.28768	2.4607	-0.40546	4.6027	2.3119	2.5471	8.8929	3.7501	-2.5809	0.065167	9.2794	6.5506	0.11778	6.5506	2.7174	2.181	-6.581	1.0433	6.6798	2.181	0.46522	2.2953	-6.0968	6.5359	2.9674	2.5319	-3.5946	6.4608	9.3972	-3.9214	6.562	-7.373	8.6892	0	1	2.4454	31562	638	1.489	1.3076	0.13873	3.3256
-6.5023	0.76873	-4.0001	0.77238	4.8928	1.8892	-6.9675	2.8096	0.68471	1.5456	-0.40546	4.3187	2.3119	1.941	8.8929	3.0403	-2.5809	0.05976	9.2794	5.3831	1.0902	5.3831	2.7174	2.0771	-6.581	0.76619	7.6522	2.0771	0.46522	2.0074	-6.0968	6.4947	2.9674	1.9689	-3.5946	6.4026	10.37	-3.9214	6.562	-7.373	8.6892	0	1	2.0174	25387	639	1.4889	1.3076	0.1387	3.3253
-6.5023	0.64098	-4.0001	0.5937	4.8928	1.5269	-6.9675	2.3948	1.6571	1.2038	-0.40546	4.3054	2.3119	1.5724	8.8929	2.4888	-2.5809	0.058314	9.2794	4.6045	2.0625	4.6045	2.7174	2.1297	-6.581	0.63706	8.6246	2.1297	0.46522	1.7371	-6.0968	6.4426	2.9674	1.5113	-3.5946	6.3894	11.342	-3.9214	6.562	-7.373	8.6892	2	4	1.7776	20384	640	1.4889	1.3075	0.13869	3.3252
-6.5023	0.40547	-4.0001	0.39559	4.8928	0.92305	-5.0441	0.98995	-0.28768	2.9766	-3.8531	1.031	2.3119	0.95294	8.8929	1.5511	-2.5809	0.030271	7.3561	2.3534	3.5655	2.3534	6.1651	1.63	-6.581	0.40314	4.7565	1.63	-1.4581	0.22821	-2.6491	1.1725	1.0441	0.21446	-0.14695	1.1705	10.922	-3.9214	1.191	-8.8973	8.454	2	6	1.1203	3401	641	3.2622	2.4464	0.33349	15.963
-6.5023	0.40547	-4.0001	0.43751	4.8928	1.4061	-5.0441	1.6122	-0.28768	2.8046	-2.1293	1.5777	2.3119	1.3785	8.8929	2.159	-2.5809	0.02844	7.3561	3.6306	1.8416	3.6306	4.4412	1.5454	-6.581	0.40793	4.7565	1.5454	-1.4581	0.48763	-4.373	2.3272	1.0441	0.50731	-1.8708	2.3052	9.1977	-3.9214	2.9148	-7.1734	8.454	2	6	1.3739	4856	642	3.4502	2.5498	0.35313	17.856
-6.5023	0.77027	-4.0001	0.71381	4.8928	2.3723	-5.0441	2.2345	-0.28768	2.4034	-0.40546	2.5145	2.3119	2.334	8.8929	3.3838	-2.5809	0.03275	7.3561	4.836	0.11778	4.836	2.7174	1.2015	-6.581	0.7669	4.7565	1.2015	-1.4581	0.88141	-6.0968	4.3323	1.0441	0.91758	-3.5946	4.2638	7.4738	-3.9214	4.6387	-5.4496	8.454	1	2	1.8348	7139	643	3.4628	2.5529	0.35642	17.986
-6.5023	0.40547	-4.0001	0.38241	4.8928	0.98344	-5.0441	1.3011	0.68471	2.0615	-2.1293	1.6664	2.3119	0.98172	8.8929	1.6115	-2.5809	0.027773	7.3561	2.879	2.814	2.879	4.4412	1.3963	-6.581	0.40212	5.7289	1.3963	-1.4581	0.38105	-4.373	2.1906	1.0441	0.3785	-1.8708	2.2103	10.17	-3.9214	2.9148	-7.1734	8.454	2	6	1.1334	3340	644	3.4502	2.5498	0.35314	17.856
-6.5023	0.51599	-4.0001	0.54022	4.8928	1.8892	-5.0441	1.8196	0.68471	1.7176	-0.40546	2.5597	2.3119	1.8484	8.8929	2.7779	-2.5809	0.02968	7.3561	4.1184	1.0902	4.1184	2.7174	1.2627	-6.581	0.51782	5.7289	1.2628	-1.4581	0.42667	-6.0968	3.9561	1.0441	0.4573	-3.5946	3.9313	8.4462	-3.9214	4.6387	-5.4496	8.454	2	6	1.5071	5900	645	3.4626	2.5527	0.35643	17.984
-6.5023	0.38359	-4.0001	0.36799	4.8928	0.6815	-5.0441	1.1605	1.6571	1.3758	-2.1293	1.6683	2.3119	0.70103	8.8929	1.1465	-2.5809	0.027439	7.3561	2.3076	3.7864	2.3076	4.4412	1.24	-6.581	0.38602	6.7012	1.24	-1.4581	0.35061	-4.373	2.1769	1.0441	0.3413	-1.8708	2.1876	11.142	-3.9214	2.9148	-7.1734	8.454	3	8	0.93961	2139	646	3.4502	2.5498	0.35315	17.856
-6.5023	0.40547	-4.0001	0.43345	4.8928	1.4061	-5.0441	1.5085	1.6571	1.2611	-0.40546	2.9288	2.3119	1.3625	8.8929	2.1123	-2.5809	0.02839	7.3561	3.4391	2.0625	3.4391	2.7174	1.3795	-6.581	0.40761	6.7012	1.3795	-1.4581	0.37111	-6.0968	3.854	1.0441	0.38429	-3.5946	3.8322	9.4186	-3.9214	4.6387	-5.4496	8.454	2	6	1.3239	4357	647	3.4625	2.5527	0.35643	17.983
-6.5023	0.38408	-4.0001	0.37357	4.8928	0.92305	-5.0441	1.1974	2.6295	0.85774	-0.40546	3.1149	2.3119	0.95368	8.8929	1.5765	-2.5809	0.02788	7.3561	2.7533	3.0349	2.7533	2.7174	1.5147	-6.581	0.38612	7.6736	1.5147	-1.4581	0.30449	-6.0968	3.747	1.0441	0.31321	-3.5946	3.7492	10.391	-3.9214	4.6387	-5.4496	8.454	2	6	1.1418	2925	648	3.4625	2.5526	0.35643	17.983
-6.5023	0.275	-4.0001	0.31055	4.8928	0.56073	-5.0441	1.0937	3.6019	0.68367	-0.40546	3.3835	2.3119	0.60386	8.8929	1.0393	-2.5809	0.02766	7.3561	2.0995	4.0073	2.0995	2.7174	2.1156	-6.581	0.27769	8.646	2.1156	-1.4581	0.3429	-6.0968	3.8499	1.0441	0.33711	-3.5946	3.879	11.363	-3.9214	4.6387	-5.4496	8.454	4	9	1.0512	1767	649	3.4625	2.5526	0.35643	17.983
-6.5023	0.40547	-4.0001	0.407	4.8928	1.1646	-3.1208	1.5557	-0.28768	2.8046	-5.577	1.4104	2.3119	1.1131	8.8929	1.7202	-2.5809	0.034316	5.4327	1.5711	5.2893	1.5711	7.8889	3.0584	-6.581	0.40318	2.8331	3.0584	-3.3815	2.2364	-0.92532	0.30089	-0.87932	2.2534	1.5769	0.27025	10.722	-3.9214	-2.4562	-8.6977	7.5645	2	6	1.2913	6125	650	2.7642	2.1975	0.25789	11.461
-6.5023	0.40547	-4.0001	0.40666	4.8928	0.6815	-3.1208	0.8297	-0.28768	3.2059	-3.8531	1.6916	2.3119	0.7046	8.8929	1.4789	-2.5809	0.016448	5.4327	1.2577	3.5655	1.2577	6.1651	2.8484	-6.581	0.40508	2.8331	2.8484	-3.3815	0.89248	-2.6491	0.99934	-0.87932	0.88386	-0.14695	1.0014	8.9982	-3.9214	-0.73237	-6.9739	7.5645	3	6	1.2035	2005	651	4.7662	2.9865	0.59591	34.075
-6.5023	0.51748	-4.0001	0.50546	4.8928	1.0438	-3.1208	0.82968	-0.28768	3.0912	-2.1293	0.62564	2.3119	1.0451	8.8929	1.8622	-2.5809	0.012533	5.4327	2.4026	1.8416	2.4026	4.4412	1.8194	-6.581	0.51831	2.8331	1.8194	-3.3815	0.16931	-4.373	0.78044	-0.87932	0.1866	-1.8708	0.76344	7.2743	-3.9214	0.99147	-5.2501	7.5645	3	7	1.1022	3304	652	5.6935	3.1448	0.81042	48.623
-6.5023	0.652	-4.0001	0.64452	4.8928	1.6477	-3.1208	1.5557	-0.28768	2.4607	-0.40546	1.1922	2.3119	1.6529	8.8929	2.6405	-2.5809	0.021622	5.4327	3.5109	0.11778	3.5109	2.7174	0.99513	-6.581	0.65123	2.8331	0.99514	-3.3815	0.54937	-6.0968	2.2482	-0.87932	0.59106	-3.5946	2.193	5.5505	-3.9214	2.7153	-3.5262	7.5645	2	6	1.3588	5303	653	5.803	3.1572	0.83801	50.511
-6.5023	0.38776	-4.0001	0.38586	4.8928	0.43995	-3.1208	0.8297	0.68471	2.2908	-3.8531	1.6916	2.3119	0.43228	8.8929	0.90675	-2.5809	0.017104	5.4327	0.82184	4.5379	0.82184	6.1651	2.2961	-6.581	0.3869	3.8055	2.2961	-3.3815	0.8961	-2.6491	1.1355	-0.87932	0.89336	-0.14695	1.1326	9.9706	-3.9214	-0.73237	-6.9739	7.5645	3	6	1.0043	1157	654	4.7662	2.9865	0.59592	34.075
-6.5023	0.40547	-4.0001	0.41437	4.8928	0.56073	-3.1208	0.51857	0.68471	2.2335	-2.1293	0.53167	2.3119	0.57035	8.8929	1.2201	-2.5809	0.0099976	5.4327	1.5938	2.814	1.5938	4.4412	1.3329	-6.581	0.40614	3.8055	1.3329	-3.3815	0.13997	-4.373	0.71866	-0.87932	0.14514	-1.8708	0.71164	8.2467	-3.9214	0.99147	-5.2501	7.5645	5	12	0.77738	2019	655	5.6933	3.1446	0.81049	48.621
-6.5023	0.52084	-4.0001	0.52245	4.8928	1.2854	-3.1208	1.1408	0.68471	1.8895	-0.40546	1.1922	2.3119	1.2661	8.8929	2.118	-2.5809	0.015855	5.4327	2.8881	1.0902	2.8881	2.7174	0.96268	-6.581	0.51938	3.8055	0.96268	-3.3815	0.36751	-6.0968	2.0911	-0.87932	0.39932	-3.5946	2.0641	6.5229	-3.9214	2.7153	-3.5262	7.5645	2	6	1.0919	4310	656	5.8021	3.1561	0.8384	50.497
-6.5023	0.27387	-4.0001	0.27797	4.8928	0.40547	-3.1208	0.8297	1.6571	1.6624	-3.8531	1.5037	2.3119	0.38476	8.8929	0.59715	-2.5809	0.018987	5.4327	0.73312	5.5102	0.73312	6.1651	1.8261	-6.581	0.27226	4.7779	1.8261	-3.3815	0.89494	-2.6491	1.1563	-0.87932	0.88654	-0.14695	1.1529	10.943	-3.9214	-0.73237	-6.9739	7.5645	3	9	0.82551	595	657	4.7662	2.9865	0.59592	34.075
-6.5023	0.38636	-4.0001	0.37905	4.8928	0.40547	-3.1208	0.51855	1.6571	1.4904	-2.1293	0.43769	2.3119	0.41365	8.8929	0.74221	-2.5809	0.009161	5.4327	0.95874	3.7864	0.95874	4.4412	0.97451	-6.581	0.38662	4.7779	0.9745	-3.3815	0.12021	-4.373	0.66439	-0.87932	0.12518	-1.8708	0.66537	9.2191	-3.9214	0.99147	-5.2501	7.5645	5	13	0.60292	1055	658	5.6933	3.1445	0.81052	48.62
-6.5023	0.40547	-4.0001	0.46641	4.8928	0.92305	-3.1208	0.82968	1.6571	1.2611	-0.40546	1.2862	2.3119	0.907	8.8929	1.5866	-2.5809	0.011603	5.4327	2.1705	2.0625	2.1705	2.7174	0.89761	-6.581	0.41044	4.7779	0.89761	-3.3815	0.24412	-6.0968	1.9052	-0.87932	0.25698	-3.5946	1.8952	7.4952	-3.9214	2.7153	-3.5262	7.5645	2	6	0.86198	2904	659	5.8018	3.1556	0.83856	50.491
-6.5023	0.27352	-4.0001	0.2715	4.8928	0.31918	-3.1208	0.41484	2.6295	0.80462	-2.1293	0.40812	2.3119	0.31635	8.8929	0.44189	-2.5809	0.0091896	5.4327	0.62023	4.7588	0.62023	4.4412	0.6332	-6.581	0.27303	5.7503	0.6332	-3.3815	0.1131	-4.373	0.54409	-0.87932	0.11615	-1.8708	0.54383	10.191	-3.9214	0.99147	-5.2501	7.5645	5	17	0.4153	472	660	5.6932	3.1445	0.81054	48.62
-6.5023	0.31886	-4.0001	0.34785	4.8928	0.55294	-3.1208	0.75441	2.6295	0.77134	-0.40546	1.6454	2.3119	0.54275	8.8929	0.94778	-2.5809	0.010692	5.4327	1.6815	3.0349	1.6815	2.7174	1.0031	-6.581	0.3211	5.7503	1.0031	-3.3815	0.3028	-6.0968	2.066	-0.87932	0.31101	-3.5946	2.0549	8.4676	-3.9214	2.7153	-3.5262	7.5645	3	8	0.7318	16491	661	5.8017	3.1555	0.83861	50.489
-6.5023	0.23075	-4.0001	0.22091	4.8928	0.31333	-3.1208	0.34293	3.6019	0.29174	-2.1293	0.69825	2.3119	0.30732	8.8929	0.30371	-2.5809	0.011948	5.4327	0.52787	5.7312	0.52787	4.4412	0.56018	-6.581	0.22976	6.7226	0.56017	-3.3815	0.21042	-4.373	0.70734	-0.87932	0.2046	-1.8708	0.7133	11.164	-3.9214	0.99147	-5.2501	7.5645	6	18	0.34965	2105	662	5.6932	3.1445	0.81054	48.619
-6.5023	0.29328	-4.0001	0.29698	4.8928	0.3932	-3.1208	0.54866	3.6019	0.40546	-0.40546	1.7697	2.3119	0.39315	8.8929	0.56978	-2.5809	0.010451	5.4327	1.1442	4.0073	1.1442	2.7174	1.2732	-6.581	0.29478	6.7226	1.2732	-3.3815	0.27334	-6.0968	2.035	-0.87932	0.27577	-3.5946	2.0336	9.44	-3.9214	2.7153	-3.5262	7.5645	5	11	0.61788	8813	663	5.8017	3.1554	0.83864	50.489
-6.5023	0.91089	-4.0001	0.95147	4.8928	1.8892	-1.1974	2.6464	-0.28768	2.4607	-7.3008	1.8243	2.3119	1.9918	8.8929	3.2255	-2.5809	0.082803	3.5094	2.105	7.0131	2.105	9.6127	4.9169	-6.581	0.91626	0.90975	4.9169	-5.3049	3.7116	0.79851	0.050573	-2.8027	3.773	3.3007	0.19656	10.522	-3.9214	-6.1034	-8.4982	5.9506	0	3	1.7805	35773	664	1.2685	1.1275	0.12502	2.4136
-6.5023	0.77024	-4.0001	0.72425	4.8928	1.7685	-1.1974	2.0271	-0.28768	2.518	-5.577	1.8737	2.3119	1.8093	8.8929	2.8252	-2.5809	0.037231	3.5094	1.5206	5.2893	1.5206	7.8889	4.1849	-6.581	0.76692	0.90975	4.1849	-5.3049	2.964	-0.92532	0.14825	-2.8027	2.9322	1.5769	0.19923	8.7986	-3.9214	-4.3795	-6.7744	5.9506	1	4	1.6136	8850	665	2.7977	2.2145	0.26338	11.741
-6.5023	0.64399	-4.0001	0.60454	4.8928	1.6477	-1.1974	1.5085	-0.28768	2.8046	-3.8531	1.9736	2.3119	1.6305	8.8929	2.6911	-2.5809	0.019194	3.5094	1.3169	3.5655	1.3169	6.1651	3.8927	-6.581	0.63786	0.90975	3.8927	-5.3049	2.4179	-2.6491	0.8925	-2.8027	2.3826	-0.14695	0.918	7.0748	-3.9214	-2.6557	-5.0506	5.9506	2	4	1.5305	3965	666	5.016	3.0419	0.64898	37.741
-6.5023	0.38434	-4.0001	0.36719	4.8928	1.1646	-1.1974	0.78252	-0.28768	2.518	-2.1293	0.8136	2.3119	1.1567	8.8929	1.6202	-2.5809	0.01499	3.5094	1.6451	1.8416	1.6451	4.4412	2.0205	-6.581	0.37583	0.90975	2.0205	-5.3049	0.699	-4.373	0.27426	-2.8027	0.68829	-1.8708	0.30168	5.351	-3.9214	-0.93188	-3.3267	5.9506	2	8	1.005	6495	667	6.4177	3.2029	1.0037	61.781
-6.5023	0.2733	-4.0001	0.28089	4.8928	0.80227	-1.1974	1.188	-0.28768	1.5435	-0.40546	0.34637	2.3119	0.78486	8.8929	0.8648	-2.5809	0.013989	3.5094	1.8992	0.11778	1.8992	2.7174	0.69117	-6.581	0.2739	0.90975	0.69117	-5.3049	1.0175	-6.0968	0.50478	-2.8027	1.0323	-3.5946	0.49171	3.6271	-3.9214	0.79197	-1.6029	5.9506	3	9	0.73906	5406	668	6.7533	3.2279	1.0922	68.41
-6.5023	0.65113	-4.0001	0.79317	4.8928	1.5269	-1.1974	2.8615	0.68471	1.6029	-7.3008	1.6638	2.3119	1.5841	8.8929	2.6365	-2.5809	0.075983	3.5094	1.8388	7.9855	1.8388	9.6127	4.2592	-6.581	0.65925	1.8821	4.2592	-5.3049	3.7439	0.79851	0.049693	-2.8027	3.8584	3.3007	0.19427	11.495	-3.9214	-6.1034	-8.4982	5.9506	1	5	1.5166	28924	669	1.2685	1.1275	0.125	2.4135
-6.5023	0.51263	-4.0001	0.55626	4.8928	1.4061	-1.1974	2.3382	0.68471	1.7176	-5.577	1.7133	2.3119	1.4355	8.8929	2.2705	-2.5809	0.036264	3.5094	1.4982	6.2617	1.4982	7.8889	3.6764	-6.581	0.51665	1.8821	3.6764	-5.3049	3.2925	-0.92532	0.24703	-2.8027	3.3004	1.5769	0.25065	9.771	-3.9214	-4.3795	-6.7744	5.9506	2	6	1.374	7060	670	2.7977	2.2144	0.26338	11.74
-6.5023	0.40547	-4.0001	0.45937	4.8928	1.1646	-1.1974	1.8196	0.68471	2.1762	-3.8531	1.8796	2.3119	1.1508	8.8929	2.0217	-2.5809	0.015932	3.5094	1.1475	4.5379	1.1475	6.1651	3.5182	-6.581	0.41101	1.8821	3.5182	-5.3049	2.5022	-2.6491	1.1144	-2.8027	2.4792	-0.14695	1.1378	8.0472	-3.9214	-2.6557	-5.0506	5.9506	2	4	1.3175	2760	671	5.0158	3.0416	0.64904	37.738
-6.5023	0.27466	-4.0001	0.30608	4.8928	0.80227	-1.1974	0.77315	0.68471	1.9469	-2.1293	0.62564	2.3119	0.8064	8.8929	1.2047	-2.5809	0.011116	3.5094	1.2098	2.814	1.2098	4.4412	1.6472	-6.581	0.27741	1.8821	1.6472	-5.3049	0.73528	-4.373	0.26886	-2.8027	0.72161	-1.8708	0.28634	6.3234	-3.9214	-0.93188	-3.3267	5.9506	3	9	0.78811	4948	672	6.4168	3.2015	1.0043	61.763
-6.5023	0.27335	-4.0001	0.27853	4.8928	0.6815	-1.1974	1.0843	0.68471	1.3736	-0.40546	0.40546	2.3119	0.67155	8.8929	0.77709	-2.5809	0.012726	3.5094	1.7867	1.0902	1.7867	2.7174	0.67405	-6.581	0.27375	1.8821	0.67405	-5.3049	0.93276	-6.0968	0.51164	-2.8027	0.94797	-3.5946	0.50549	4.5995	-3.9214	0.79197	-1.6029	5.9506	4	11	0.68279	5621	673	6.7484	3.2202	1.0956	68.31
-6.5023	0.38608	-4.0001	0.40792	4.8928	1.0438	-1.1974	2.6619	1.6571	1.2038	-5.577	1.5165	2.3119	1.0704	8.8929	1.7545	-2.5809	0.035714	3.5094	1.5636	7.2341	1.5636	7.8889	3.1792	-6.581	0.38656	2.8545	3.1792	-5.3049	3.5391	-0.92532	0.3819	-2.8027	3.5714	1.5769	0.34661	10.743	-3.9214	-4.3795	-6.7744	5.9506	2	6	1.2033	5193	674	2.7976	2.2144	0.26337	11.74
-6.5023	0.40547	-4.0001	0.40775	4.8928	0.6815	-1.1974	2.0271	1.6571	1.3758	-3.8531	1.9736	2.3119	0.67805	8.8929	1.3314	-2.5809	0.012612	3.5094	1.203	5.5102	1.203	6.1651	2.9797	-6.581	0.40543	2.8545	2.9797	-5.3049	2.5753	-2.6491	1.4365	-2.8027	2.5623	-0.14695	1.4391	9.0196	-3.9214	-2.6557	-5.0506	5.9506	3	6	1.1452	1603	675	5.0157	3.0416	0.64907	37.736
-6.5023	0.27336	-4.0001	0.27732	4.8928	0.56073	-1.1974	0.67881	1.6571	1.3758	-2.1293	0.53167	2.3119	0.55505	8.8929	0.80052	-2.5809	0.0083726	3.5094	0.82023	3.7864	0.82022	4.4412	1.3475	-6.581	0.27368	2.8545	1.3475	-5.3049	0.7453	-4.373	0.31462	-2.8027	0.74169	-1.8708	0.32721	7.2957	-3.9214	-0.93188	-3.3267	5.9506	5	12	0.61627	3113	676	6.4164	3.201	1.0045	61.756
-6.5023	0.27331	-4.0001	0.27524	4.8928	0.56073	-1.1974	0.77315	1.6571	1.1465	-0.40546	0.44035	2.3119	0.54278	8.8929	0.64568	-2.5809	0.010227	3.5094	1.5201	2.0625	1.5201	2.7174	0.57103	-6.581	0.27355	2.8545	0.57102	-5.3049	0.73532	-6.0968	0.54664	-2.8027	0.74657	-3.5946	0.54746	5.5719	-3.9214	0.79197	-1.6029	5.9506	4	14	0.57821	4463	677	6.7465	3.2173	1.0969	68.273
-6.5023	0.38695	-4.0001	0.38014	4.8928	0.40547	-1.1974	2.2345	2.6295	0.7473	-3.8531	1.8796	2.3119	0.41549	8.8929	0.76574	-2.5809	0.01204	3.5094	1.6069	6.4826	1.6069	6.1651	2.4878	-6.581	0.38674	3.8269	2.4878	-5.3049	2.5924	-2.6491	1.5677	-2.8027	2.5812	-0.14695	1.5718	9.992	-3.9214	-2.6557	-5.0506	5.9506	4	7	1.0057	827	678	5.0157	3.0415	0.64908	37.736
-6.5023	0.27323	-4.0001	0.26669	4.8928	0.40547	-1.1974	0.67881	2.6295	0.7473	-2.1293	0.43769	2.3119	0.40224	8.8929	0.45068	-2.5809	0.0076835	3.5094	0.6329	4.7588	0.6329	4.4412	0.91849	-6.581	0.2729	3.8269	0.91849	-5.3049	0.73498	-4.373	0.3156	-2.8027	0.72894	-1.8708	0.32687	8.2681	-3.9214	-0.93188	-3.3267	5.9506	6	16	0.4682	1693	679	6.4163	3.2008	1.0046	61.753
-6.5023	0.27324	-4.0001	0.26854	4.8928	0.40547	-1.1974	0.56573	2.6295	0.68998	-0.40546	0.53433	2.3119	0.39922	8.8929	0.43453	-2.5809	0.0075791	3.5094	1.0204	3.0349	1.0204	2.7174	0.54707	-6.581	0.27308	3.8269	0.54707	-5.3049	0.52805	-6.0968	0.58146	-2.8027	0.53863	-3.5946	0.57714	6.5443	-3.9214	0.79197	-1.6029	5.9506	6	16	0.45621	2805	680	6.7458	3.2162	1.0974	68.259
-6.5023	0.24833	-4.0001	0.26214	4.8928	0.40547	-1.1974	2.0093	3.6019	0.40169	-3.8531	0.64846	2.3119	0.40964	8.8929	0.5701	-2.5809	0.015725	3.5094	1.3244	7.455	1.3244	6.1651	1.3103	-6.581	0.24693	4.7993	1.3103	-5.3049	2.1622	-2.6491	0.47758	-2.8027	2.1492	-0.14695	0.48938	10.964	-3.9214	-2.6557	-5.0506	5.9506	5	11	0.66256	80610	681	5.0157	3.0415	0.64909	37.736
-6.5023	0.27324	-4.0001	0.26204	4.8928	0.28469	-1.1974	0.78252	3.6019	0.29082	-2.1293	0.34371	2.3119	0.2963	8.8929	0.3002	-2.5809	0.0071672	3.5094	0.55515	5.7312	0.55514	4.4412	0.54783	-6.581	0.27252	4.7993	0.54783	-5.3049	0.6882	-4.373	0.35304	-2.8027	0.68955	-1.8708	0.35412	9.2405	-3.9214	-0.93188	-3.3267	5.9506	5	17	0.37284	622	682	6.4162	3.2008	1.0046	61.752
-6.5023	0.27338	-4.0001	0.26732	4.8928	0.28469	-1.1974	0.36768	3.6019	0.29082	-0.40546	0.72229	2.3119	0.29081	8.8929	0.30602	-2.5809	0.0067878	3.5094	0.54184	4.0073	0.54185	2.7174	0.56572	-6.581	0.27294	4.7993	0.56572	-5.3049	0.3678	-6.0968	0.58506	-2.8027	0.37321	-3.5946	0.58846	7.5167	-3.9214	0.79197	-1.6029	5.9506	6	18	0.3677	1232	683	6.7455	3.2158	1.0976	68.254
-6.5023	1.6928	-4.0001	1.6538	4.8928	3.3385	0.72595	4.3672	-0.28768	2.4607	-7.3008	1.4778	2.3119	3.428	8.8929	4.8013	-2.5809	0.125	1.586	2.4761	7.0131	2.4761	9.6127	6.5264	-6.581	1.6938	-1.0136	6.5265	-7.2282	5.9387	0.79851	0.1427	-4.726	5.8642	3.3007	0.29589	8.5991	-3.9214	-8.0268	-6.5748	4.0954	0	3	2.4985	51049	684	1.2688	1.1276	0.12522	2.4149
-6.5023	1.0333	-4.0001	0.96465	4.8928	2.6139	0.72595	2.9133	-0.28768	2.0021	-5.577	2.1034	2.3119	2.6041	8.8929	3.9264	-2.5809	0.041692	1.586	1.6036	5.2893	1.6036	7.8889	4.9834	-6.581	1.029	-1.0136	4.9834	-7.2282	4.3783	-0.92532	0.06392	-4.726	4.2807	1.5769	0.16251	6.8753	-3.9214	-6.3029	-4.851	4.0954	0	3	1.9384	10789	685	2.7994	2.215	0.26384	11.755
-6.5023	1.0309	-4.0001	0.94705	4.8928	2.4931	0.72595	2.3948	-0.28768	2.0594	-3.8531	2.0675	2.3119	2.493	8.8929	3.6678	-2.5809	0.037922	1.586	1.1565	3.5655	1.1565	6.1651	4.2988	-6.581	1.0274	-1.0136	4.2988	-7.2282	3.9002	-2.6491	0.37564	-4.726	3.848	-0.14695	0.45436	5.1514	-3.9214	-4.5791	-3.1272	4.0954	0	3	1.8321	5509	686	5.028	3.0451	0.65119	37.921
-6.5023	0.40547	-4.0001	0.4105	4.8928	1.6477	0.72595	1.0465	-0.28768	1.3715	-2.1293	1.0955	2.3119	1.6285	8.8929	2.0745	-2.5809	0.025674	1.586	0.82389	1.8416	0.82389	4.4412	2.6334	-6.581	0.40591	-1.0136	2.6334	-7.2282	1.6526	-4.373	0.44347	-4.726	1.6035	-1.8708	0.48655	3.4276	-3.9214	-2.8553	-1.4034	4.0954	2	6	0.99621	6389	687	6.4819	3.2191	1.0136	63.023
-6.5023	1.2925	-4.0001	1.3106	4.8928	2.6139	0.72595	4.5727	0.68471	1.5456	-7.3008	1.5567	2.3119	2.6695	8.8929	4.0152	-2.5809	0.10843	1.586	2.278	7.9855	2.278	9.6127	5.7631	-6.581	1.2911	-0.041241	5.7631	-7.2282	5.8291	0.79851	0.077641	-4.726	5.8662	3.3007	0.23264	9.5715	-3.9214	-8.0268	-6.5748	4.0954	0	3	2.1487	44551	688	1.2686	1.1276	0.12512	2.4142
-6.5023	0.78485	-4.0001	0.81054	4.8928	2.2516	0.72595	3.4837	0.68471	1.3163	-5.577	2.0573	2.3119	2.2036	8.8929	3.3742	-2.5809	0.0391	1.586	1.6838	6.2617	1.6838	7.8889	4.6119	-6.581	0.78368	-0.041241	4.6119	-7.2282	4.7045	-0.92532	0.10474	-4.726	4.6418	1.5769	0.18994	7.8477	-3.9214	-6.3029	-4.851	4.0954	0	3	1.7841	10200	689	2.7989	2.2147	0.2638	11.751
-6.5023	0.78603	-4.0001	0.78038	4.8928	2.1308	0.72595	2.8096	0.68471	1.4883	-3.8531	2.0675	2.3119	2.1361	8.8929	3.2917	-2.5809	0.026339	1.586	1.2051	4.5379	1.2051	6.1651	4.1505	-6.581	0.78428	-0.041241	4.1505	-7.2282	4.1673	-2.6491	0.60249	-4.726	4.1163	-0.14695	0.64308	6.1238	-3.9214	-4.5791	-3.1272	4.0954	0	3	1.6771	4929	690	5.0265	3.0434	0.65164	37.899
-6.5023	0.37546	-4.0001	0.36676	4.8928	1.3516	0.72595	1.3091	0.68471	1.124	-2.1293	0.94851	2.3119	1.3467	8.8929	1.7925	-2.5809	0.018905	1.586	0.86734	2.814	0.86733	4.4412	2.3085	-6.581	0.37448	-0.041241	2.3085	-7.2282	1.8135	-4.373	0.40801	-4.726	1.7715	-1.8708	0.442	4.4	-3.9214	-2.8553	-1.4034	4.0954	2	6	0.91258	54158	691	6.4757	3.2097	1.0175	62.902
-6.5023	0.89914	-4.0001	0.95904	4.8928	1.9107	0.72595	4.6076	1.6571	1.1751	-7.3008	1.8774	2.3119	1.9802	8.8929	3.2306	-2.5809	0.090675	1.586	2.1456	8.9579	2.1456	9.6127	4.948	-6.581	0.90324	0.93113	4.948	-7.2282	5.6988	0.79851	0.053394	-4.726	5.775	3.3007	0.20302	10.544	-3.9214	-8.0268	-6.5748	4.0954	0	3	1.9048	273000	692	1.2686	1.1275	0.12508	2.4139
-6.5023	0.76964	-4.0001	0.7158	4.8928	1.7685	0.72595	3.8467	1.6571	1.1465	-5.577	1.9018	2.3119	1.7874	8.8929	2.8186	-2.5809	0.0378	1.586	1.85	7.2341	1.85	7.8889	4.1827	-6.581	0.76664	0.93113	4.1827	-7.2282	4.9365	-0.92532	0.16057	-4.726	4.9062	1.5769	0.20776	8.82	-3.9214	-6.3029	-4.851	4.0954	1	4	1.6915	8881	693	2.7988	2.2146	0.26378	11.75
-6.5023	0.64798	-4.0001	0.63793	4.8928	1.6477	0.72595	3.3282	1.6571	1.2038	-3.8531	1.9736	2.3119	1.6327	8.8929	2.6952	-2.5809	0.019451	1.586	1.4605	5.5102	1.4605	6.1651	3.9206	-6.581	0.64958	0.93113	3.9206	-7.2282	4.3392	-2.6491	0.88892	-4.726	4.3123	-0.14695	0.91094	7.0962	-3.9214	-4.5791	-3.1272	4.0954	2	4	1.5732	3905	694	5.026	3.0427	0.6518	37.891
-6.5023	0.37936	-4.0001	0.35606	4.8928	1.1646	0.72595	1.5651	1.6571	1.0318	-2.1293	0.8136	2.3119	1.1251	8.8929	1.4935	-2.5809	0.014483	1.586	0.85419	3.7864	0.85419	4.4412	1.9829	-6.581	0.37518	0.93113	1.9829	-7.2282	2.0272	-4.373	0.38259	-4.726	1.997	-1.8708	0.40937	5.3724	-3.9214	-2.8553	-1.4034	4.0954	2	6	0.88509	6392	695	6.4733	3.2062	1.019	62.856
-6.5023	0.27335	-4.0001	0.26531	4.8928	0.40547	0.72595	0.52796	1.6571	0.63056	-0.40546	0.31148	2.3119	0.3912	8.8929	0.42103	-2.5809	0.0085899	1.586	0.57079	2.0625	0.57079	2.7174	0.46799	-6.581	0.27271	0.93113	0.46799	-7.2282	0.57494	-6.0968	0.29876	-4.726	0.57661	-3.5946	0.30278	3.6485	-3.9214	-1.1314	0.32049	4.0954	6	18	0.40235	2377	696	6.9008	3.243	1.1279	71.432
-6.5023	0.51062	-4.0001	0.47493	4.8928	1.4061	0.72595	4.2616	2.6295	0.91927	-5.577	1.7197	2.3119	1.4283	8.8929	2.2478	-2.5809	0.036805	1.586	2.3956	8.2065	2.3956	7.8889	3.6659	-6.581	0.5061	1.9035	3.6659	-7.2282	5.2691	-0.92532	0.27101	-4.726	5.2977	1.5769	0.27427	9.7924	-3.9214	-6.3029	-4.851	4.0954	2	6	1.5487	7098	697	2.7987	2.2146	0.26378	11.749
-6.5023	0.50746	-4.0001	0.47327	4.8928	1.1646	0.72595	3.6393	2.6295	0.85774	-3.8531	1.9736	2.3119	1.1329	8.8929	1.9866	-2.5809	0.0158	1.586	2.0194	6.4826	2.0194	6.1651	3.4996	-6.581	0.50522	1.9035	3.4996	-7.2282	4.4259	-2.6491	1.1316	-4.726	4.4047	-0.14695	1.1536	8.0686	-3.9214	-4.5791	-3.1272	4.0954	2	4	1.436	2667	698	5.0258	3.0425	0.65187	37.888
-6.5023	0.27367	-4.0001	0.29367	4.8928	0.80227	0.72595	1.8762	2.6295	0.7473	-2.1293	0.71962	2.3119	0.78593	8.8929	1.0914	-2.5809	0.010334	1.586	0.91949	4.7588	0.9195	4.4412	1.6109	-6.581	0.27468	1.9035	1.6109	-7.2282	2.1967	-4.373	0.37326	-4.726	2.1771	-1.8708	0.38921	6.3448	-3.9214	-2.8553	-1.4034	4.0954	4	8	0.78546	4791	699	6.4724	3.2048	1.0196	62.838
-6.5023	0.27339	-4.0001	0.2659	4.8928	0.40547	0.72595	0.52796	2.6295	0.63265	-0.40546	0.31148	2.3119	0.38797	8.8929	0.41734	-2.5809	0.0084047	1.586	0.5687	3.0349	0.5687	2.7174	0.46896	-6.581	0.27281	1.9035	0.46895	-7.2282	0.57522	-6.0968	0.29883	-4.726	0.5796	-3.5946	0.30276	4.6209	-3.9214	-1.1314	0.32049	4.0954	6	18	0.40281	2326	700	6.8962	3.2356	1.1314	71.336
-6.5023	0.3853	-4.0001	0.40488	4.8928	1.0438	0.72595	4.6137	3.6019	1.0276	-5.577	1.5241	2.3119	1.092	8.8929	1.7614	-2.5809	0.03634	1.586	3.013	9.1788	3.013	7.8889	3.1363	-6.581	0.38639	2.8759	3.1363	-7.2282	5.5431	-0.92532	0.43422	-4.726	5.5732	1.5769	0.39482	10.765	-3.9214	-6.3029	-4.851	4.0954	2	6	1.4999	5210	701	2.7987	2.2145	0.26377	11.749
-6.5023	0.40547	-4.0001	0.40764	4.8928	0.6815	0.72595	3.9504	3.6019	0.56902	-3.8531	1.9736	2.3119	0.67599	8.8929	1.331	-2.5809	0.012641	1.586	2.8499	7.455	2.8499	6.1651	3.0077	-6.581	0.40555	2.8759	3.0077	-7.2282	4.4893	-2.6491	1.4654	-4.726	4.4818	-0.14695	1.4676	9.041	-3.9214	-4.5791	-3.1272	4.0954	4	7	1.3313	1513	702	5.0257	3.0424	0.65189	37.887
-6.5023	0.27337	-4.0001	0.27644	4.8928	0.43995	0.72595	2.0836	3.6019	0.5117	-2.1293	0.53167	2.3119	0.44504	8.8929	0.68602	-2.5809	0.0082334	1.586	1.346	5.7312	1.346	4.4412	1.2499	-6.581	0.27362	2.8759	1.2499	-7.2282	2.3004	-4.373	0.38796	-4.726	2.2884	-1.8708	0.39561	7.3171	-3.9214	-2.8553	-1.4034	4.0954	5	11	0.68613	3037	703	6.4721	3.2043	1.0198	62.832
-6.5023	0.27343	-4.0001	0.26488	4.8928	0.31918	0.72595	0.73538	3.6019	0.56902	-0.40546	0.31148	2.3119	0.32356	8.8929	0.3717	-2.5809	0.0079901	1.586	0.52994	4.0073	0.52994	2.7174	0.39299	-6.581	0.27275	2.8759	0.393	-7.2282	0.67823	-6.0968	0.30278	-4.726	0.67829	-3.5946	0.30752	5.5933	-3.9214	-1.1314	0.32049	4.0954	6	18	0.41223	1947	704	6.8944	3.2327	1.1327	71.299
-6.5023	2.2346	-1.4979	2.8818	-4.1997	1.7685	-6.9675	2.6022	-0.28768	2.4607	-7.3008	2.6597	-9.2108	2.7437	-2.7019	1.4241	-5.0111	2.1692	-2.2433	0.12261	7.0131	0.12261	-1.91	0.03015	-6.509	2.2051	6.6798	0.030156	0.46522	1.3049	0.79851	1.4098	5.4697	2.4535	5.8029	2.4994	4.7698	-1.4912	-0.33329	-14.268	0.063833	0	4	2.4346	16230	705	4.1003	2.9406	0.39439	25.218
-6.5023	1.9698	-1.4979	3.005	-4.1997	1.7685	-6.9675	1.8762	0.68471	1.7749	-7.3008	1.9342	-9.2108	1.9231	-2.7019	1.2142	-5.0111	1.7409	-2.2433	0.11946	7.9855	0.11946	-1.91	0.026943	-6.509	1.9661	7.6522	0.026938	0.46522	1.099	0.79851	1.2208	5.4697	2.3846	5.8029	2.4567	5.7422	-1.4912	-0.33329	-14.268	0.063833	0	4	2.0547	11669	706	4.0977	2.9384	0.39455	25.187
-6.5023	1.5581	-1.4979	2.5044	-4.1997	2.3723	-6.9675	1.4613	0.68471	1.5456	-5.577	1.5359	-9.2108	1.5013	-2.7019	0.23202	-5.0111	1.5994	-2.2433	0.053126	6.2617	0.053126	-3.6339	0.16424	-6.509	1.5479	7.6522	0.16424	0.46522	0.17478	-0.92532	0.3854	5.4697	1.6769	4.0791	1.7161	4.0184	-1.4912	1.3905	-12.544	0.063833	0	7	1.8296	6834	707	5.6793	3.2889	0.7268	48.381
-6.5023	1.6891	-1.4979	3.1341	-4.1997	1.6477	-6.9675	1.1502	1.6571	1.1465	-7.3008	1.192	-9.2108	1.1841	-2.7019	1.0474	-5.0111	1.4765	-2.2433	0.11732	8.9579	0.11733	-1.91	0.025613	-6.509	1.6836	8.6246	0.025615	0.46522	0.91283	0.79851	1.0639	5.4697	2.5758	5.8029	2.6488	6.7146	-1.4912	-0.33329	-14.268	0.063833	0	4	1.6599	7819	708	4.0967	2.9376	0.39461	25.175
-6.5023	1.05	-1.4979	2.5334	-4.1997	2.3723	-6.9675	1.0447	1.6571	1.0891	-5.577	1.066	-9.2108	1.0091	-2.7019	0.21389	-5.0111	1.6719	-2.2433	0.054284	7.2341	0.05428	-3.6339	0.16775	-6.509	1.053	8.6246	0.16776	0.46522	0.15931	-0.92532	0.38736	5.4697	1.7641	4.0791	1.8015	4.9907	-1.4912	1.3905	-12.544	0.063833	0	7	1.5259	4887	709	5.6753	3.2839	0.72822	48.314
-6.5023	0.82215	-1.4979	2.4865	-4.1997	2.3723	-6.9675	0.73536	1.6571	1.2038	-3.8531	1.2217	-9.2108	0.7657	-2.7019	0.10817	-5.0111	1.7316	-2.2433	0.028544	5.5102	0.028545	-5.3577	0.59056	-6.509	0.82862	8.6246	0.59057	0.46522	0.088567	-2.6491	0.69509	5.4697	1.794	2.3553	1.7632	3.2669	-1.4912	3.1144	-10.821	0.063833	1	8	1.4736	11422	710	6.2158	3.3666	0.84635	57.955
-6.5023	1.2985	-1.4979	3.1913	-4.1997	1.6477	-6.9675	0.61957	2.6295	0.57533	-7.3008	0.61603	-9.2108	0.57971	-2.7019	0.94802	-5.0111	1.3966	-2.2433	0.10894	9.9303	0.10894	-1.91	0.02352	-6.509	1.3006	9.597	0.023524	0.46522	0.81275	0.79851	0.95991	5.4697	2.9092	5.8029	2.9714	7.687	-1.4912	-0.33329	-14.268	0.063833	3	8	1.3247	4761	711	4.0964	2.9372	0.39463	25.17
-6.5023	0.52504	-1.4979	2.5102	-4.1997	2.3723	-6.9675	0.42423	2.6295	0.57533	-5.577	0.5961	-9.2108	0.49642	-2.7019	0.19479	-5.0111	1.8864	-2.2433	0.051526	8.2065	0.051522	-3.6339	0.15473	-6.509	0.52939	9.597	0.15473	0.46522	0.14523	-0.92532	0.35335	5.4697	2.005	4.0791	2.0441	5.9631	-1.4912	1.3905	-12.544	0.063833	4	13	1.1672	3181	712	5.6738	3.282	0.72877	48.289
-6.5023	0.52412	-1.4979	2.5163	-4.1997	2.3723	-6.9675	0.42423	2.6295	0.68998	-3.8531	0.67411	-9.2108	0.45199	-2.7019	0.11821	-5.0111	1.9379	-2.2433	0.027802	6.4826	0.027804	-5.3577	0.53412	-6.509	0.5275	9.597	0.53412	0.46522	0.095455	-2.6491	0.62579	5.4697	1.988	2.3553	2.107	4.2393	-1.4912	3.1144	-10.821	0.063833	4	13	1.2002	6571	713	6.2082	3.3561	0.84983	57.812
-6.5023	1.1625	-1.4979	3.4915	-4.1997	1.5269	-6.9675	0.19987	3.6019	0.22509	-7.3008	0.24908	-9.2108	0.25606	-2.7019	1.0944	-5.0111	1.5424	-2.2433	0.11515	10.903	0.11515	-1.91	0.024484	-6.509	1.1651	10.569	0.024488	0.46522	0.97565	0.79851	1.1163	5.4697	3.507	5.8029	3.5882	8.6593	-1.4912	-0.33329	-14.268	0.063833	3	8	1.1425	2186	714	4.0962	2.9371	0.39465	25.169
-6.5023	0.27204	-1.4979	2.6277	-4.1997	2.3723	-6.9675	0.21681	3.6019	0.2335	-5.577	0.25107	-9.2108	0.22773	-2.7019	0.21293	-5.0111	2.4275	-2.2433	0.049861	9.1788	0.049855	-3.6339	0.13134	-6.509	0.26791	10.569	0.13134	0.46522	0.16948	-0.92532	0.34488	5.4697	2.6242	4.0791	2.7216	6.9355	-1.4912	1.3905	-12.544	0.063833	4	13	0.99558	1405	715	5.6733	3.2813	0.72897	48.279
-6.5023	0.37823	-1.4979	2.5309	-4.1997	2.3723	-6.9675	0.32052	3.6019	0.33973	-3.8531	0.28646	-9.2108	0.31165	-2.7019	0.15173	-5.0111	2.1848	-2.2433	0.033844	7.455	0.033844	-5.3577	0.51281	-6.509	0.37495	10.569	0.51281	0.46522	0.11678	-2.6491	0.62811	5.4697	2.3026	2.3553	2.8151	5.2117	-1.4912	3.1144	-10.821	0.063833	4	13	1.038	3055	716	6.2053	3.3521	0.85118	57.759
-6.5023	0.55079	-1.4979	2.5939	-4.1997	2.4931	-6.9675	0.52794	3.6019	0.5117	-2.1293	0.56969	-9.2108	0.4871	-2.7019	0.12312	-5.0111	1.8835	-2.2433	0.029801	5.7312	0.0298	-7.0815	1.4081	-6.509	0.55723	10.569	1.4081	0.46522	0.097093	-4.373	1.4924	5.4697	1.9716	0.63145	3.2862	3.4878	-1.4912	4.8382	-9.0968	0.063833	4	10	1.2078	8227	717	6.3243	3.3767	0.87293	59.995
-6.5023	1.3215	-1.4979	1.862	-4.1997	4.184	-5.0441	2.3382	0.68471	1.3779	-7.3008	2.7647	-9.2108	3.2166	-2.7019	3.0964	-5.0111	0.81809	-4.1667	0.51031	7.9855	0.51032	-1.91	0.36118	-6.509	1.3203	5.7289	0.36118	-1.4581	1.6407	0.79851	2.4757	3.5463	2.1383	5.8029	2.9479	3.8188	-1.4912	-2.2567	-12.345	0.062362	0	4	2.308	49818	718	5.1146	4.6804	0.09277	39.239
-6.5023	0.91845	-1.4979	1.5078	-4.1997	5.1501	-5.0441	1.8196	1.6571	1.1465	-7.3008	2.5594	-9.2108	3.8519	-2.7019	4.0009	-5.0111	0.66031	-4.1667	1.2777	8.9579	1.2777	-1.91	0.70731	-6.509	0.91772	6.7012	0.70731	-1.4581	1.6152	0.79851	2.7291	3.5463	2.1212	5.8029	3.1665	4.7912	-1.4912	-2.2567	-12.345	0.062362	0	3	2.1837	41188	719	5.1093	4.6791	0.091941	39.157
-6.5023	0.55701	-1.4979	1.1614	-4.1997	6.3579	-5.0441	1.4048	2.6295	0.86194	-7.3008	2.8838	-9.2108	5.9412	-2.7019	5.595	-5.0111	0.59377	-4.1667	3.0856	9.9303	3.0856	-1.91	1.6727	-6.509	0.56354	7.6736	1.6727	-1.4581	1.5952	0.79851	2.7887	3.5463	2.0602	5.8029	3.2816	5.7636	-1.4912	-2.2567	-12.345	0.062362	1	3	2.2045	30781	720	5.1072	4.6786	0.091622	39.126
-6.5023	0.73238	-1.4979	1.7846	-4.1997	3.1087	-5.0441	1.2315	2.6295	0.78286	-5.577	1.2267	-9.2108	1.2307	-2.7019	2.9594	-5.0111	0.77381	-4.1667	0.1541	8.2065	0.1541	-3.6339	0.02948	-6.509	0.73293	7.6736	0.029483	-1.4581	2.2481	-0.92532	2.7007	3.5463	3.4368	4.0791	3.7251	4.0398	-1.4912	-0.53283	-10.621	0.062362	1	6	1.4778	69689	721	10.09	7.4695	0.35084	152.71
-6.5023	0.40547	-1.4979	0.78696	-4.1997	7.5812	-5.0441	1.5804	3.6019	0.76966	-7.3008	3.4477	-9.2108	7.5174	-2.7019	6.9938	-5.0111	0.53132	-4.1667	4.9649	10.903	4.9649	-1.91	3.0232	-6.509	0.41026	8.646	3.0232	-1.4581	1.5826	0.79851	2.9223	3.5463	1.7693	5.8029	3.3513	6.736	-1.4912	-2.2567	-12.345	0.062362	1	3	2.4286	143000	722	5.1065	4.6784	0.091504	39.114
-6.5023	0.5212	-1.4979	1.7827	-4.1997	3.097	-5.0441	1.6028	3.6019	0.56902	-5.577	1.7534	-9.2108	1.7554	-2.7019	3.6382	-5.0111	0.75114	-4.1667	0.15415	9.1788	0.15415	-3.6339	0.034811	-6.509	0.52379	8.646	0.034805	-1.4581	2.4088	-0.92532	2.7824	3.5463	3.7785	4.0791	3.9823	5.0122	-1.4912	-0.53283	-10.621	0.062362	2	7	1.5543	5874	723	10.088	7.4678	0.35085	152.65
-6.5023	0.35056	-1.4979	2.745	-4.1997	2.2516	-5.0441	0.26397	3.6019	0.28241	-3.8531	0.28195	-9.2108	0.28549	-2.7019	0.33502	-5.0111	2.4581	-4.1667	0.066193	7.455	0.066196	-5.3577	0.1534	-6.509	0.35156	8.646	0.1534	-1.4581	0.25458	-2.6491	0.48774	3.5463	2.8658	2.3553	3.0007	3.2883	-1.4912	1.191	-8.8973	0.062362	4	13	1.0292	1409	724	14.529	8.543	0.70066	316.63
-6.5023	0.43778	-1.4979	2.7676	-4.1997	4.184	-3.1208	1.2445	2.6295	0.80462	-7.3008	1.3801	-9.2108	1.4882	-2.7019	2.9144	-5.0111	1.7117	-6.0901	0.80481	9.9303	0.8048	-1.91	0.11784	-6.509	0.44441	5.7503	0.11784	-3.3815	1.6795	0.79851	2.4222	1.6229	1.9155	5.8029	1.779	3.8402	-1.4912	-4.18	-10.422	0.053865	1	4	1.8031	85686	725	5.3341	5.2497	0.016078	42.679
-6.5023	0.39011	-1.4979	2.3964	-4.1997	7.3241	-3.1208	1.5557	3.6019	0.34814	-7.3008	2.4505	-9.2108	4.921	-2.7019	5.0034	-5.0111	1.802	-6.0901	2.671	10.903	2.671	-1.91	1.3659	-6.509	0.39494	6.7226	1.3659	-3.3815	1.8196	0.79851	2.7254	1.6229	1.9576	5.8029	1.7118	4.8126	-1.4912	-4.18	-10.422	0.053865	2	3	2.4108	36155	726	5.3291	5.2494	0.015173	42.598
-6.5023	1.5864	-1.4979	1.8493	-1.9265	1.79	-6.9675	1.6671	-0.28768	1.8301	-7.3008	2.2259	-6.9377	2.1109	-0.4287	0.58465	-5.0111	2.0333	0.029832	0.40077	7.0131	0.40077	0.36313	0.11231	-6.509	1.5835	6.6798	0.11232	0.46522	0.12278	0.79851	0.47699	5.4697	2.1556	5.8029	2.4239	7.043	-1.4912	-0.33329	-14.268	0.49471	0	7	1.8248	22607	727	1.6327	1.2691	0.28647	3.9987
-6.5023	1.3004	-1.4979	2.1322	-1.9265	2.0316	-6.9675	1.2539	-0.28768	2.1167	-5.577	2.2056	-6.9377	1.3497	-0.4287	0.098419	-5.0111	1.7026	0.029832	0.1296	5.2893	0.1296	-1.3607	0.44435	-6.509	1.2804	6.6798	0.44435	0.46522	0.086401	-0.92532	0.53153	5.4697	1.7439	4.0791	1.9374	5.3191	-1.4912	1.3905	-12.544	0.49471	0	7	1.8401	16149	728	2.264	1.5845	0.42891	7.6889
-6.5023	1.1602	-1.4979	2.393	-1.9265	2.3939	-6.9675	1.1502	-0.28768	2.1167	-3.8531	2.0802	-6.9377	1.1497	-0.4287	0.070076	-5.0111	1.4995	0.029832	0.037343	3.5655	0.037342	-3.0845	0.97119	-6.509	1.1244	6.6798	0.97119	0.46522	0.057039	-2.6491	0.95712	5.4697	1.5557	2.3553	1.6735	3.5953	-1.4912	3.1144	-10.821	0.49471	0	4	1.8824	19823	729	2.4931	1.7334	0.43826	9.3232
-6.5023	1.2993	-1.4979	1.8107	-1.9265	1.5485	-6.9675	1.343	0.68471	1.431	-7.3008	1.756	-6.9377	1.722	-0.4287	0.55446	-5.0111	2.0397	0.029832	0.38073	7.9855	0.38073	0.36313	0.10613	-6.509	1.2565	7.6522	0.10613	0.46522	0.11872	0.79851	0.45654	5.4697	2.1701	5.8029	2.388	8.0153	-1.4912	-0.33329	-14.268	0.49471	0	7	1.5314	18376	730	1.6321	1.2687	0.28641	3.9954
-6.5023	0.94873	-1.4979	2.0891	-1.9265	1.954	-6.9675	0.94279	0.68471	1.6029	-5.577	1.6576	-6.9377	1.0186	-0.4287	0.094962	-5.0111	1.7544	0.029832	0.11883	6.2617	0.11883	-1.3607	0.38823	-6.509	0.94785	7.6522	0.38823	0.46522	0.082549	-0.92532	0.46643	5.4697	1.8038	4.0791	1.9522	6.2915	-1.4912	1.3905	-12.544	0.49471	0	7	1.5325	12691	731	2.2614	1.582	0.4294	7.6706
-6.5023	0.90447	-1.4979	2.281	-1.9265	2.2731	-6.9675	0.94279	0.68471	1.6029	-3.8531	1.5976	-6.9377	0.88291	-0.4287	0.068441	-5.0111	1.5587	0.029832	0.038773	4.5379	0.038775	-3.0845	0.89634	-6.509	0.89509	7.6522	0.89633	0.46522	0.057288	-2.6491	0.87172	5.4697	1.616	2.3553	1.7815	4.5677	-1.4912	3.1144	-10.821	0.49471	0	4	1.6003	17685	732	2.4794	1.721	0.44065	9.2208
-6.5023	0.91358	-1.4979	1.85	-1.9265	1.3501	-6.9675	0.94279	1.6571	0.97449	-7.3008	1.2894	-6.9377	1.328	-0.4287	0.53228	-5.0111	2.1021	0.029832	0.36626	8.9579	0.36625	0.36313	0.10215	-6.509	0.90876	8.6246	0.10215	0.46522	0.11574	0.79851	0.43728	5.4697	2.2188	5.8029	2.4272	8.9877	-1.4912	-0.33329	-14.268	0.49471	0	7	1.2201	13644	733	1.6318	1.2685	0.28637	3.9942
-6.5023	0.65135	-1.4979	2.0159	-1.9265	1.9108	-6.9675	0.63166	1.6571	1.1465	-5.577	1.16	-6.9377	0.6839	-0.4287	0.090741	-5.0111	1.8031	0.029832	0.10871	7.2341	0.10871	-1.3607	0.35074	-6.509	0.65205	8.6246	0.35074	0.46522	0.078323	-0.92532	0.40812	5.4697	1.8474	4.0791	2.0036	7.2639	-1.4912	1.3905	-12.544	0.49471	2	11	1.2527	9042	734	2.2603	1.5811	0.42958	7.6637
-6.5023	0.64992	-1.4979	2.1992	-1.9265	2.1523	-6.9675	0.63166	1.6571	1.0891	-3.8531	1.1278	-6.9377	0.66569	-0.4287	0.06666	-5.0111	1.6319	0.029832	0.040566	5.5102	0.040565	-3.0845	0.79878	-6.509	0.65006	8.6246	0.79878	0.46522	0.058149	-2.6491	0.78598	5.4697	1.6833	2.3553	1.9173	5.5401	-1.4912	3.1144	-10.821	0.49471	2	8	1.3083	12564	735	2.4741	1.7162	0.4416	9.182
-6.5023	0.91314	-1.4979	2.445	-1.9265	2.3939	-6.9675	0.94279	1.6571	1.0891	-2.1293	1.0947	-6.9377	0.94974	-0.4287	0.065505	-5.0111	1.5095	0.029832	0.033453	3.7864	0.033454	-4.8084	1.3387	-6.509	0.91315	8.6246	1.3387	0.46522	0.049341	-4.373	1.33	5.4697	1.5591	0.63145	2.2661	3.8162	-1.4912	4.8382	-9.0968	0.49471	0	4	1.4798	18119	736	2.5322	1.761	0.4379	9.6181
-6.5023	0.51359	-1.4979	1.9956	-1.9265	1.4277	-6.9675	0.52794	2.6295	0.518	-7.3008	0.81466	-6.9377	0.84626	-0.4287	0.49693	-5.0111	2.1711	0.029832	0.34174	9.9303	0.34175	0.36313	0.10065	-6.509	0.49183	9.597	0.10064	0.46522	0.11442	0.79851	0.4088	5.4697	2.3075	5.8029	2.5151	9.9601	-1.4912	-0.33329	-14.268	0.49471	3	11	0.96625	8877	737	1.6317	1.2685	0.28637	3.9937
-6.5023	0.39005	-1.4979	2.0604	-1.9265	1.9108	-6.9675	0.40547	2.6295	0.62845	-5.577	0.67582	-6.9377	0.392	-0.4287	0.088337	-5.0111	1.9147	0.029832	0.09637	8.2065	0.096371	-1.3607	0.30484	-6.509	0.39208	9.597	0.30483	0.46522	0.071765	-0.92532	0.35149	5.4697	1.9689	4.0791	2.0982	8.2363	-1.4912	1.3905	-12.544	0.49471	4	13	1.0118	5509	738	2.26	1.5808	0.42966	7.6611
-6.5023	0.40547	-1.4979	2.0732	-1.9265	2.0316	-6.9675	0.42423	2.6295	0.68998	-3.8531	0.69567	-6.9377	0.45913	-0.4287	0.065717	-5.0111	1.6853	0.029832	0.043577	6.4826	0.043575	-3.0845	0.71405	-6.509	0.41707	9.597	0.71405	0.46522	0.060382	-2.6491	0.70504	5.4697	1.7268	2.3553	2.0563	6.5125	-1.4912	3.1144	-10.821	0.49471	4	13	1.0534	8086	739	2.4722	1.7144	0.44198	9.1674
-6.5023	0.67089	-1.4979	2.3361	-1.9265	2.2731	-6.9675	0.73536	2.6295	0.86194	-2.1293	0.87802	-6.9377	0.71977	-0.4287	0.064517	-5.0111	1.5862	0.029832	0.036259	4.7588	0.036261	-4.8084	1.4592	-6.509	0.67711	9.597	1.4593	0.46522	0.056137	-4.373	1.4352	5.4697	1.6134	0.63145	2.5957	4.7886	-1.4912	4.8382	-9.0968	0.49471	2	8	1.2926	14155	740	2.5214	1.7512	0.43978	9.536
-6.5023	0.25156	-1.4979	2.2267	-1.9265	1.4709	-6.9675	0.21412	3.6019	0.22509	-7.3008	0.34636	-6.9377	0.43591	-0.4287	0.46527	-5.0111	2.191	0.029832	0.32205	10.903	0.32205	0.36313	0.095455	-6.509	0.23541	10.569	0.095455	0.46522	0.10961	0.79851	0.37846	5.4697	2.3702	5.8029	2.5634	10.932	-1.4912	-0.33329	-14.268	0.49471	4	13	0.78912	3957	741	1.6317	1.2684	0.28636	3.9935
-6.5023	0.24968	-1.4979	2.0835	-1.9265	1.954	-6.9675	0.20967	3.6019	0.22509	-5.577	0.22018	-6.9377	0.20547	-0.4287	0.092833	-5.0111	2.0136	0.029832	0.08662	9.1788	0.086627	-1.3607	0.24959	-6.509	0.24313	10.569	0.24959	0.46522	0.057404	-0.92532	0.29775	5.4697	2.0737	4.0791	2.1669	9.2087	-1.4912	1.3905	-12.544	0.49471	4	13	0.82368	2368	742	2.2598	1.5806	0.42968	7.6601
-6.5023	0.37876	-1.4979	2.0435	-1.9265	2.0316	-6.9675	0.32052	3.6019	0.34814	-3.8531	0.3759	-6.9377	0.35342	-0.4287	0.066372	-5.0111	1.8041	0.029832	0.05216	7.455	0.052162	-3.0845	0.7517	-6.509	0.35943	10.569	0.7517	0.46522	0.073579	-2.6491	0.73839	5.4697	1.8357	2.3553	2.3659	7.4848	-1.4912	3.1144	-10.821	0.49471	4	11	0.9164	4252	743	2.4714	1.7137	0.44212	9.1619
-6.5023	0.51543	-1.4979	2.212	-1.9265	2.1523	-6.9675	0.52794	3.6019	0.74099	-2.1293	0.78404	-6.9377	0.52713	-0.4287	0.065706	-5.0111	1.6861	0.029832	0.039813	5.7312	0.039812	-4.8084	1.7302	-6.509	0.51467	10.569	1.7302	0.46522	0.064886	-4.373	1.6943	5.4697	1.7101	0.63145	3.0463	5.761	-1.4912	4.8382	-9.0968	0.49471	3	9	1.1555	9226	744	2.5173	1.7475	0.44051	9.5049
-6.5023	0.90119	-1.4979	2.4377	-1.9265	2.3939	-6.9675	0.94279	3.6019	1.3142	-0.40546	1.3719	-6.9377	0.90671	-0.4287	0.065092	-5.0111	1.5227	0.029832	0.035771	4.0073	0.03577	-6.5322	2.8191	-6.509	0.88757	10.569	2.8191	0.46522	0.050503	-6.0968	2.7978	5.4697	1.5645	-1.0924	3.8631	4.0372	-1.4912	6.562	-7.373	0.49471	0	4	1.5603	17630	745	2.536	1.7623	0.43903	9.6473
-6.5023	2.3649	-1.4979	2.1188	-1.9265	2.5578	-5.0441	2.2345	-0.28768	1.7155	-7.3008	2.3199	-6.9377	2.6959	-0.4287	2.3022	-5.0111	1.478	-1.8935	0.86832	7.0131	0.86832	0.36313	0.46111	-6.509	2.3414	4.7565	0.46111	-1.4581	1.238	0.79851	0.88032	3.5463	1.8241	5.8029	2.2733	5.1196	-1.4912	-2.2567	-12.345	0.48539	0	2	2.2186	133000	746	2.0398	1.8932	0.077413	6.241
-6.5023	1.4519	-1.4979	1.7594	-1.9265	2.0316	-5.0441	1.8196	-0.28768	1.8875	-5.577	2.1937	-6.9377	2.1883	-0.4287	0.65506	-5.0111	1.7264	-1.8935	0.48293	5.2893	0.48293	-1.3607	0.11212	-6.509	1.4434	4.7565	0.11212	-1.4581	0.13134	-0.92532	0.51064	3.5463	1.8233	4.0791	2.522	3.3958	-1.4912	-0.53283	-10.621	0.48539	0	7	1.8573	15183	747	4.0342	3.1997	0.26081	24.412
-6.5023	1.8408	-1.4979	1.8554	-1.9265	2.9978	-5.0441	1.7159	0.68471	1.2017	-7.3008	2.0468	-6.9377	2.8837	-0.4287	2.6894	-5.0111	1.4136	-1.8935	1.0267	7.9855	1.0267	0.36313	0.57676	-6.509	1.8291	5.7289	0.57676	-1.4581	1.2201	0.79851	0.90405	3.5463	1.7634	5.8029	2.3087	6.092	-1.4912	-2.2567	-12.345	0.48539	0	2	1.9431	130000	748	2.0361	1.8924	0.075927	6.2187
-6.5023	1.2065	-1.4979	1.594	-1.9265	1.79	-5.0441	1.4048	0.68471	1.431	-5.577	1.7977	-6.9377	1.8244	-0.4287	0.61003	-5.0111	1.7276	-1.8935	0.45276	6.2617	0.45277	-1.3607	0.10504	-6.509	1.2016	5.7289	0.10504	-1.4581	0.12073	-0.92532	0.48494	3.5463	1.8454	4.0791	2.5447	4.3682	-1.4912	-0.53283	-10.621	0.48539	0	7	1.5373	12290	749	4.0239	3.1933	0.26009	24.287
-6.5023	1.4226	-1.4979	1.6127	-1.9265	3.7224	-5.0441	1.3011	1.6571	1.0891	-7.3008	1.9163	-6.9377	3.49	-0.4287	3.105	-5.0111	1.3609	-1.8935	1.7787	8.9579	1.7787	0.36313	0.90014	-6.509	1.3975	6.7012	0.90014	-1.4581	1.2165	0.79851	0.9373	3.5463	1.6823	5.8029	2.332	7.0643	-1.4912	-2.2567	-12.345	0.48539	0	0	1.844	119000	750	2.0347	1.8921	0.075362	6.2103
-6.5023	0.89505	-1.4979	1.4849	-1.9265	1.4745	-5.0441	0.96318	1.6571	0.94768	-5.577	1.351	-6.9377	1.428	-0.4287	0.56788	-5.0111	1.7298	-1.8935	0.42818	7.2341	0.42818	-1.3607	0.096254	-6.509	0.85922	6.7012	0.096255	-1.4581	0.1154	-0.92532	0.47038	3.5463	1.8977	4.0791	2.5423	5.3405	-1.4912	-0.53283	-10.621	0.48539	0	7	1.186	69978	751	4.02	3.1909	0.25982	24.24
-6.5023	0.63885	-1.4979	1.8428	-1.9265	1.6342	-5.0441	0.62027	1.6571	1.0614	-3.8531	1.1187	-6.9377	0.68897	-0.4287	0.08002	-5.0111	1.5493	-1.8935	0.12043	5.5102	0.12043	-3.0845	0.32423	-6.509	0.63379	6.7012	0.32423	-1.4581	0.084811	-2.6491	0.39305	3.5463	1.6589	2.3553	1.9259	3.6167	-1.4912	1.191	-8.8973	0.48539	2	11	1.1527	39798	752	5.7923	4.0708	0.42289	50.327
-6.5023	0.92584	-1.4979	1.4148	-1.9265	4.4471	-5.0441	0.98995	2.6295	0.91927	-7.3008	1.9447	-6.9377	4.1671	-0.4287	3.574	-5.0111	1.3282	-1.8935	2.8701	9.9303	2.8701	0.36313	1.3483	-6.509	0.92951	7.6736	1.3484	-1.4581	1.2079	0.79851	0.96482	3.5463	1.5675	5.8029	2.3201	8.0367	-1.4912	-2.2567	-12.345	0.48539	0	0	1.7736	101000	753	2.0342	1.892	0.075141	6.2071
-6.5023	0.51337	-1.4979	1.5733	-1.9265	1.3069	-5.0441	0.5751	2.6295	0.518	-5.577	0.87822	-6.9377	0.97673	-0.4287	0.52672	-5.0111	1.7389	-1.8935	0.41072	8.2065	0.41072	-1.3607	0.095657	-6.509	0.48648	7.6736	0.095657	-1.4581	0.11811	-0.92532	0.43598	3.5463	1.9791	4.0791	2.5875	6.3129	-1.4912	-0.53283	-10.621	0.48539	3	11	0.89416	5765	754	4.0185	3.19	0.25971	24.222
-6.5023	0.40547	-1.4979	1.8753	-1.9265	1.6693	-5.0441	0.36768	2.6295	0.57533	-3.8531	0.65419	-6.9377	0.40382	-0.4287	0.073281	-5.0111	1.6497	-1.8935	0.10542	6.4826	0.10543	-3.0845	0.28684	-6.509	0.39888	7.6736	0.28685	-1.4581	0.078328	-2.6491	0.34413	3.5463	1.789	2.3553	1.9717	4.5891	-1.4912	1.191	-8.8973	0.48539	4	13	0.92454	3216	755	5.7866	4.0657	0.42326	50.226
-6.5023	0.53219	-1.4979	1.1978	-1.9265	5.0509	-5.0441	0.98057	3.6019	1.1996	-7.3008	2.2259	-6.9377	4.9369	-0.4287	4.179	-5.0111	1.2724	-1.8935	4.1038	10.903	4.1038	0.36313	1.9904	-6.509	0.53765	8.646	1.9904	-1.4581	1.2083	0.79851	0.99371	3.5463	1.3719	5.8029	2.269	9.0091	-1.4912	-2.2567	-12.345	0.48539	1	2	1.8645	77471	756	2.034	1.892	0.075058	6.2058
-6.5023	0.26845	-1.4979	1.7666	-1.9265	1.1862	-5.0441	0.26397	3.6019	0.28241	-5.577	0.52819	-6.9377	0.62586	-0.4287	0.65392	-5.0111	1.7379	-1.8935	0.47938	9.1788	0.47937	-1.3607	0.1087	-6.509	0.26525	8.646	0.1087	-1.4581	0.12851	-0.92532	0.55022	3.5463	2.0399	4.0791	2.6845	7.2853	-1.4912	-0.53283	-10.621	0.48539	4	13	0.71597	2743	757	4.0179	3.1897	0.25967	24.215
-6.5023	0.26924	-1.4979	1.9475	-1.9265	1.7124	-5.0441	0.26397	3.6019	0.22509	-3.8531	0.24833	-6.9377	0.24105	-0.4287	0.075326	-5.0111	1.8247	-1.8935	0.089849	7.455	0.089847	-3.0845	0.22696	-6.509	0.26567	8.646	0.22696	-1.4581	0.056551	-2.6491	0.28275	3.5463	1.9619	2.3553	2.0913	5.5615	-1.4912	1.191	-8.8973	0.48539	4	13	0.77775	1390	758	5.7844	4.0638	0.42341	50.188
-6.5023	0.37851	-1.4979	2.21	-1.9265	2.1523	-5.0441	0.3583	3.6019	0.34814	-2.1293	0.35482	-6.9377	0.35113	-0.4287	0.049922	-5.0111	1.8948	-1.8935	0.05983	5.7312	0.05983	-4.8084	0.72663	-6.509	0.37412	8.646	0.72663	-1.4581	0.067435	-4.373	0.70637	3.5463	1.8652	0.63145	2.5426	3.8376	-1.4912	2.9148	-7.1734	0.48539	4	13	0.96701	2437	759	6.4292	4.4468	0.44581	62.001
-6.5023	1.5754	-1.4979	2.6179	-1.9265	2.5147	-3.1208	2.0742	0.68471	1.6029	-7.3008	1.0982	-6.9377	1.4064	-0.4287	2.0207	-5.0111	1.438	-3.8169	1.0348	7.9855	1.0348	0.36313	0.47305	-6.509	1.5739	3.8055	0.47305	-3.3815	1.4636	0.79851	0.84891	1.6229	1.7489	5.8029	1.6025	4.1686	-1.4912	-4.18	-10.422	0.43008	0	2	1.9139	409000	760	2.1359	2.0945	0.019788	6.8433
-6.5023	1.0671	-1.4979	2.3834	-1.9265	3.3601	-3.1208	1.6594	1.6571	1.2611	-7.3008	1.0042	-6.9377	1.6079	-0.4287	2.4005	-5.0111	1.3461	-3.8169	1.0548	8.9579	1.0548	0.36313	0.50234	-6.509	1.0721	4.7779	0.50234	-3.3815	1.4504	0.79851	0.8667	1.6229	1.901	5.8029	1.588	5.141	-1.4912	-4.18	-10.422	0.43008	0	2	1.7892	318000	761	2.1269	2.0941	0.015663	6.7855
-6.5023	1.228	-1.4979	2.2361	-1.9265	2.7562	-3.1208	1.1408	1.6571	0.97449	-5.577	1.2686	-6.9377	1.9392	-0.4287	2.6315	-5.0111	1.0213	-3.8169	0.86819	7.2341	0.86819	-1.3607	0.46423	-6.509	1.2255	4.7779	0.46423	-3.3815	1.2244	-0.92532	0.93334	1.6229	2.1439	4.0791	1.7594	3.4172	-1.4912	-2.4562	-8.6977	0.43008	0	2	1.6007	79693	762	4.8684	4.5686	0.065635	35.553
-6.5023	0.65337	-1.4979	2.0349	-1.9265	4.5678	-3.1208	1.3482	2.6295	0.86194	-7.3008	0.99819	-6.9377	2.7182	-0.4287	2.9356	-5.0111	1.2274	-3.8169	1.2579	9.9303	1.2579	0.36313	1.0867	-6.509	0.6555	5.7503	1.0867	-3.3815	1.3787	0.79851	0.89186	1.6229	2.0383	5.8029	1.4966	6.1134	-1.4912	-4.18	-10.422	0.43008	1	2	1.7441	223000	763	2.1235	2.094	0.014092	6.7637
-6.5023	0.82	-1.4979	1.9746	-1.9265	3.6016	-3.1208	0.9334	2.6295	0.80462	-5.577	1.2539	-6.9377	2.4347	-0.4287	3.0717	-5.0111	0.8788	-3.8169	1.0758	8.2065	1.0758	-1.3607	0.52739	-6.509	0.82535	5.7503	0.52738	-3.3815	1.3279	-0.92532	0.96756	1.6229	2.1288	4.0791	1.8028	4.3896	-1.4912	-2.4562	-8.6977	0.43008	0	2	1.5647	67522	764	4.8601	4.5671	0.064144	35.43
-6.5023	0.40547	-1.4979	1.6299	-1.9265	5.534	-3.1208	1.5557	3.6019	0.85564	-7.3008	1.1922	-6.9377	4.0187	-0.4287	3.7403	-5.0111	1.0521	-3.8169	2.4857	10.903	2.4857	0.36313	1.8136	-6.509	0.3992	6.7226	1.8136	-3.3815	1.3997	0.79851	0.91028	1.6229	2.1984	5.8029	1.4092	7.0858	-1.4912	-4.18	-10.422	0.43008	1	2	1.8621	147000	765	2.1222	2.0939	0.013508	6.7555
-6.5023	0.51457	-1.4979	1.6733	-1.9265	4.4471	-3.1208	0.93342	3.6019	0.79831	-5.577	1.4702	-6.9377	3.2889	-0.4287	3.5499	-5.0111	0.72843	-3.8169	2.3071	9.1788	2.3071	-1.3607	0.99512	-6.509	0.51593	6.7226	0.99512	-3.3815	1.4471	-0.92532	1.0053	1.6229	2.0488	4.0791	1.8279	5.3619	-1.4912	-2.4562	-8.6977	0.43008	1	3	1.6395	52173	766	4.8569	4.5665	0.063585	35.384
-6.5023	0.27442	-1.4979	0.8886	-1.9265	2.3939	-3.1208	0.41484	3.6019	0.33973	-3.8531	0.75558	-6.9377	1.1357	-0.4287	1.1915	-5.0111	0.39024	-3.8169	0.70231	7.455	0.70231	-3.0845	0.2007	-6.509	0.27658	6.7226	0.20071	-3.3815	0.22086	-2.6491	0.85487	1.6229	0.93721	2.3553	1.5584	3.6381	-1.4912	-0.73237	-6.9739	0.43008	3	10	0.84451	5019	767	9.8265	7.9564	0.23504	144.84
-6.5023	1.4276	-1.4979	2.7881	-1.9265	2.5578	-1.1974	0.77315	2.6295	0.85774	-7.3008	0.90779	-6.9377	1.1348	-0.4287	2.0612	-5.0111	1.5537	-5.7402	1.191	9.9303	1.191	0.36313	0.49005	-6.509	1.4254	3.8269	0.49005	-5.3049	1.5935	0.79851	0.86194	-0.30042	2.5774	5.8029	1.7528	4.19	-1.4912	-6.1034	-8.4982	0.24255	0	2	1.552	333000	768	2.1488	2.1279	0.0098126	6.926
-6.5023	0.89902	-1.4979	2.4951	-1.9265	3.6016	-1.1974	0.78252	3.6019	0.79831	-7.3008	0.82529	-6.9377	1.516	-0.4287	2.3966	-5.0111	1.5174	-5.7402	1.6879	10.903	1.6879	0.36313	0.51636	-6.509	0.87632	4.7993	0.51636	-5.3049	1.4832	0.79851	0.86966	-0.30042	2.766	5.8029	1.6226	5.1624	-1.4912	-6.1034	-8.4982	0.24255	0	2	1.567	229000	769	2.14	2.1278	0.0057459	6.8695
-6.5023	0.6501	-1.4979	2.8766	-1.9265	2.3939	-1.1974	0.78252	3.6019	0.5117	-5.577	1.0085	-6.9377	1.8622	-0.4287	2.8085	-5.0111	1.6579	-5.7402	0.88043	9.1788	0.88043	-1.3607	0.47825	-6.509	0.65379	4.7993	0.47824	-5.3049	1.4142	-0.92532	1.1502	-0.30042	3.1898	4.0791	2.9567	3.4386	-1.4912	-4.3795	-6.7744	0.24255	2	5	1.3706	125000	770	5.0336	4.9554	0.015784	38.005
-6.5023	1.9446	-1.4979	2.9201	-1.9265	2.1955	0.72595	1.1502	3.6019	1.3715	-7.3008	1.0042	-6.9377	1.0608	-0.4287	1.908	-5.0111	1.613	-7.6636	2.6277	10.903	2.6277	0.36313	0.46889	-6.509	1.914	2.8759	0.46889	-7.2282	3.3779	0.79851	0.88373	-2.2238	4.1615	5.8029	1.7688	3.239	-1.4912	-8.0268	-6.5748	0.061216	0	2	1.7644	419000	771	2.1727	2.132	0.019077	7.0808
-6.5023	1.8441	-1.4979	2.1219	0.34656	2.5363	-6.9675	1.6509	-0.28768	2.0021	-7.3008	2.1977	-4.6646	1.7527	1.8444	0.61578	-5.0111	1.357	2.3029	0.80252	7.0131	0.80252	2.6362	0.68458	-6.509	1.8397	6.6798	0.68458	0.46522	0.28222	0.79851	0.45281	5.4697	1.3411	5.8029	1.5255	9.3161	-1.4912	-0.33329	-14.268	1.9761	0	5	2.0588	98551	772	1.0995	0.94707	0.16094	1.8133
-6.5023	1.6413	-1.4979	2.5936	0.34656	2.7778	-6.9675	1.9799	-0.28768	1.4862	-5.577	1.4419	-4.6646	1.7302	1.8444	0.47171	-5.0111	1.1232	2.3029	0.38623	5.2893	0.38623	0.91241	0.98315	-6.509	1.6443	6.6798	0.98314	0.46522	0.33999	-0.92532	0.86469	5.4697	1.2018	4.0791	1.5018	7.5922	-1.4912	1.3905	-12.544	1.9761	0	4	1.9868	77427	773	1.5231	1.3252	0.14936	3.4799
-6.5023	1.4295	-1.4979	2.6578	0.34656	2.7778	-6.9675	1.6688	-0.28768	1.7155	-3.8531	1.789	-4.6646	1.3862	1.8444	0.28803	-5.0111	1.0495	2.3029	0.24605	3.5655	0.24605	-0.81142	1.3973	-6.509	1.4292	6.6798	1.3973	0.46522	0.07263	-2.6491	1.0337	5.4697	1.1481	2.3553	1.7993	5.8684	-1.4912	3.1144	-10.821	1.9761	0	4	2.0064	50133	774	1.6681	1.5161	0.10026	4.1737
-6.5023	1.4543	-1.4979	2.8192	0.34656	2.7778	-6.9675	1.4613	-0.28768	0.85564	-2.1293	1.1044	-4.6646	1.3878	1.8444	0.24399	-5.0111	1.0614	2.3029	0.21804	1.8416	0.21804	-2.5353	1.2472	-6.509	1.4484	6.6798	1.2472	0.46522	0.041926	-4.373	1.148	5.4697	1.2315	0.63145	2.0948	4.1446	-1.4912	4.8382	-9.0968	1.9761	0	4	1.7454	35091	775	1.7124	1.5657	0.093693	4.3983
-6.5023	1.4526	-1.4979	1.7739	0.34656	2.4155	-6.9675	1.2539	0.68471	1.431	-7.3008	1.7578	-4.6646	1.673	1.8444	0.70694	-5.0111	1.3796	2.3029	0.88432	7.9855	0.88432	2.6362	0.69613	-6.509	1.4541	7.6522	0.69614	0.46522	0.24954	0.79851	0.38239	5.4697	1.3889	5.8029	1.545	10.288	-1.4912	-0.33329	-14.268	1.9761	0	5	1.6808	89214	776	1.0994	0.94703	0.16088	1.813
-6.5023	1.2294	-1.4979	2.2669	0.34656	2.7778	-6.9675	1.6688	0.68471	1.087	-5.577	1.0682	-4.6646	1.5208	1.8444	0.5357	-5.0111	1.1601	2.3029	0.43287	6.2617	0.43287	0.91241	1.095	-6.509	1.2356	7.6522	1.095	0.46522	0.40069	-0.92532	0.80133	5.4697	1.2349	4.0791	1.5453	8.5646	-1.4912	1.3905	-12.544	1.9761	0	4	1.683	81008	777	1.5227	1.325	0.1492	3.478
-6.5023	1.1805	-1.4979	2.5129	0.34656	2.7778	-6.9675	1.5651	0.68471	1.2017	-3.8531	1.4131	-4.6646	1.2932	1.8444	0.32979	-5.0111	1.096	2.3029	0.29862	4.5379	0.29862	-0.81142	1.4335	-6.509	1.1807	7.6522	1.4335	0.46522	0.085641	-2.6491	1.0006	5.4697	1.1673	2.3553	2.0389	6.8408	-1.4912	3.1144	-10.821	1.9761	0	4	1.7752	52314	778	1.666	1.5155	0.099276	4.1632
-6.5023	1.2044	-1.4979	2.7284	0.34656	2.7778	-6.9675	1.3576	0.68471	0.91506	-2.1293	1.0016	-4.6646	1.2562	1.8444	0.25107	-5.0111	1.0941	2.3029	0.22469	2.814	0.22469	-2.5353	1.3888	-6.509	1.2084	7.6522	1.3888	0.46522	0.045933	-4.373	1.2662	5.4697	1.2185	0.63145	2.3297	5.117	-1.4912	4.8382	-9.0968	1.9761	0	4	1.6641	43628	779	1.7008	1.563	0.088198	4.3391
-6.5023	1.748	-1.4979	2.9256	0.34656	2.7778	-6.9675	1.7725	0.68471	0.62844	-0.40546	0.62223	-4.6646	1.4658	1.8444	0.26446	-5.0111	1.0854	2.3029	0.24135	1.0902	0.24135	-4.2591	2.3206	-6.509	1.6981	7.6522	2.3206	0.46522	0.045071	-6.0968	2.2455	5.4697	1.3595	-1.0924	3.5566	3.3931	-1.4912	6.562	-7.373	1.9761	2	6	1.7458	29902	780	1.7371	1.576	0.10227	4.5265
-6.5023	1.089	-1.4979	1.4509	0.34656	2.396	-6.9675	0.96621	1.6571	1.1372	-7.3008	1.459	-4.6646	1.6766	1.8444	0.83046	-5.0111	1.4107	2.3029	0.99351	8.9579	0.99351	2.6362	0.72882	-6.509	1.0934	8.6246	0.72882	0.46522	0.22489	0.79851	0.33083	5.4697	1.4139	5.8029	1.5753	11.261	-1.4912	-0.33329	-14.268	1.9761	0	4	1.4164	566000	781	1.0994	0.94702	0.16085	1.8129
-6.5023	0.91352	-1.4979	1.9846	0.34656	2.7953	-6.9675	1.3777	1.6571	0.98557	-5.577	0.85378	-4.6646	1.457	1.8444	0.63997	-5.0111	1.1706	2.3029	0.53736	7.2341	0.53735	0.91241	1.2237	-6.509	0.91873	8.6246	1.2237	0.46522	0.45844	-0.92532	0.78018	5.4697	1.2655	4.0791	1.5376	9.537	-1.4912	1.3905	-12.544	1.9761	0	4	1.4851	583000	782	1.5226	1.325	0.14913	3.4773
-6.5023	0.90907	-1.4979	2.3386	0.34656	2.7953	-6.9675	1.4463	1.6571	1.0993	-3.8531	1.1335	-4.6646	1.2589	1.8444	0.43635	-5.0111	1.1453	2.3029	0.41028	5.5102	0.41028	-0.81142	1.6575	-6.509	0.91272	8.6246	1.6575	0.46522	0.13164	-2.6491	1.0601	5.4697	1.1939	2.3553	2.3365	7.8132	-1.4912	3.1144	-10.821	1.9761	0	4	1.6204	376000	783	1.6652	1.5153	0.098908	4.1592
-6.5023	1.052	-1.4979	2.6068	0.34656	2.7778	-6.9675	1.2539	1.6571	1.0891	-2.1293	1.16	-4.6646	1.191	1.8444	0.27709	-5.0111	1.1269	2.3029	0.24882	3.7864	0.24882	-2.5353	1.6631	-6.509	1.0544	8.6246	1.6631	0.46522	0.056835	-4.373	1.4738	5.4697	1.2151	0.63145	2.574	6.0893	-1.4912	4.8382	-9.0968	1.9761	0	4	1.6566	51284	784	1.6964	1.5619	0.086119	4.3168
-6.5023	1.4261	-1.4979	2.7905	0.34656	2.7778	-6.9675	1.4613	1.6571	0.97448	-0.40546	0.99689	-4.6646	1.3585	1.8444	0.24505	-5.0111	1.0754	2.3029	0.21963	2.0625	0.21963	-4.2591	2.5067	-6.509	1.4163	8.6246	2.5067	0.46522	0.042686	-6.0968	2.4132	5.4697	1.243	-1.0924	3.7551	4.3655	-1.4912	6.562	-7.373	1.9761	0	4	1.7379	37365	785	1.7129	1.5703	0.090809	4.4012
-6.5023	0.64808	-1.4979	1.6288	0.34656	2.7778	-6.9675	1.1502	2.6295	0.80042	-5.577	0.71961	-4.6646	1.484	1.8444	0.83499	-5.0111	1.1667	2.3029	0.68602	8.2065	0.68602	0.91241	1.44	-6.509	0.64794	9.597	1.44	0.46522	0.49177	-0.92532	0.76409	5.4697	1.2833	4.0791	1.4839	10.509	-1.4912	1.3905	-12.544	1.9761	2	6	1.2875	62706	786	1.5225	1.325	0.14911	3.477
-6.5023	0.66282	-1.4979	2.1142	0.34656	3.0194	-6.9675	1.3576	2.6295	0.91927	-3.8531	0.96403	-4.6646	1.3114	1.8444	0.63865	-5.0111	1.1638	2.3029	0.58195	6.4826	0.58195	-0.81142	2.0818	-6.509	0.66801	9.597	2.0818	0.46522	0.20742	-2.6491	1.1771	5.4697	1.1869	2.3553	2.6234	8.7856	-1.4912	3.1144	-10.821	1.9761	1	6	1.5062	41286	787	1.6649	1.5152	0.098763	4.1577
-6.5023	0.90868	-1.4979	2.4066	0.34656	2.7778	-6.9675	1.2539	2.6295	1.0339	-2.1293	1.0965	-4.6646	1.1733	1.8444	0.35633	-5.0111	1.1526	2.3029	0.33107	4.7588	0.33107	-2.5353	2.1332	-6.509	0.90947	9.597	2.1332	0.46522	0.088187	-4.373	1.7805	5.4697	1.2047	0.63145	3.1148	7.0617	-1.4912	4.8382	-9.0968	1.9761	0	4	1.5796	48786	788	1.6948	1.5615	0.085324	4.3084
-6.5023	1.1757	-1.4979	2.663	0.34656	2.7778	-6.9675	1.3576	2.6295	1.3737	-0.40546	1.3801	-4.6646	1.2365	1.8444	0.25925	-5.0111	1.1099	2.3029	0.23249	3.0349	0.23249	-4.2591	2.9142	-6.509	1.1764	9.597	2.9142	0.46522	0.049151	-6.0968	2.7632	5.4697	1.2258	-1.0924	4.0514	5.3379	-1.4912	6.562	-7.373	1.9761	0	4	1.788	45877	789	1.7037	1.5682	0.086402	4.3537
-6.5023	0.40547	-1.4979	1.3236	0.34656	2.8986	-6.9675	0.94049	3.6019	0.74099	-5.577	0.62563	-4.6646	1.6571	1.8444	1.17	-5.0111	1.1041	2.3029	0.87728	9.1788	0.87727	0.91241	1.8965	-6.509	0.40237	10.569	1.8965	0.46522	0.51856	-0.92532	0.7644	5.4697	1.2803	4.0791	1.3274	11.482	-1.4912	1.3905	-12.544	1.9761	3	5	1.1558	45997	790	1.5225	1.3249	0.14909	3.4769
-6.5023	0.50874	-1.4979	1.8641	0.34656	3.1401	-6.9675	1.2539	3.6019	1.0849	-3.8531	1.0338	-4.6646	1.4857	1.8444	0.929	-5.0111	1.1486	2.3029	0.79246	7.455	0.79246	-0.81142	2.6636	-6.509	0.50547	10.569	2.6636	0.46522	0.28081	-2.6491	1.3798	5.4697	1.1641	2.3553	2.8558	9.758	-1.4912	3.1144	-10.821	1.9761	1	3	1.4809	33105	791	1.6648	1.5152	0.098718	4.1571
-6.5023	0.66206	-1.4979	2.2542	0.34656	2.8986	-6.9675	1.1502	3.6019	1.3715	-2.1293	1.3135	-4.6646	1.1804	1.8444	0.5096	-5.0111	1.2051	2.3029	0.48946	5.7312	0.48946	-2.5353	2.822	-6.509	0.6671	10.569	2.822	0.46522	0.13592	-4.373	2.187	5.4697	1.2127	0.63145	3.738	8.0341	-1.4912	4.8382	-9.0968	1.9761	1	6	1.6083	41030	792	1.6941	1.5614	0.085019	4.3051
-6.5023	1.036	-1.4979	2.5859	0.34656	2.7778	-6.9675	1.2539	3.6019	1.8301	-0.40546	1.7595	-4.6646	1.1871	1.8444	0.29234	-5.0111	1.1385	2.3029	0.26419	4.0073	0.26419	-4.2591	3.324	-6.509	1.0372	10.569	3.324	0.46522	0.064768	-6.0968	3.0914	5.4697	1.2088	-1.0924	4.3427	6.3103	-1.4912	6.562	-7.373	1.9761	0	4	1.8739	52079	793	1.7002	1.5674	0.08473	4.3358
-6.5023	1.7139	-1.4979	1.7983	0.34656	2.5363	-5.0441	1.6122	-0.28768	2.2887	-7.3008	1.5681	-4.6646	1.7654	1.8444	1.6431	-5.0111	1.3311	0.37958	2.1724	7.0131	2.1724	2.6362	1.5854	-6.509	1.7075	4.7565	1.5854	-1.4581	1.597	0.79851	0.69221	3.5463	1.9485	5.8029	1.8496	7.3927	-1.4912	-2.2567	-12.345	1.9554	0	1	1.9196	222000	794	1.3712	1.2989	0.055663	2.8203
-6.5023	1.5732	-1.4979	2.3248	0.34656	2.657	-5.0441	1.3011	-0.28768	1.5435	-5.577	2.0058	-4.6646	1.7787	1.8444	0.5859	-5.0111	1.0682	0.37958	0.88038	5.2893	0.88039	0.91241	0.62713	-6.509	1.5705	4.7565	0.62713	-1.4581	0.28058	-0.92532	0.44394	3.5463	0.98657	4.0791	1.2672	5.6689	-1.4912	-0.53283	-10.621	1.9554	0	5	1.9009	64844	795	2.7091	2.3506	0.15251	11.009
-6.5023	1.4622	-1.4979	2.7796	0.34656	2.8986	-5.0441	1.8196	-0.28768	1.3715	-3.8531	1.306	-4.6646	1.5506	1.8444	0.46446	-5.0111	0.92859	0.37958	0.40381	3.5655	0.40381	-0.81142	0.82659	-6.509	1.4667	4.7565	0.82659	-1.4581	0.39028	-2.6491	0.74789	3.5463	0.94746	2.3553	1.6319	3.945	-1.4912	1.191	-8.8973	1.9554	0	5	1.9396	42611	796	3.9041	3.367	0.1595	22.863
-6.5023	1.3014	-1.4979	1.5379	0.34656	2.657	-5.0441	1.3011	0.68471	1.5456	-7.3008	1.4679	-4.6646	2.0406	1.8444	1.7008	-5.0111	1.2738	0.37958	2.0182	7.9855	2.0182	2.6362	1.4755	-6.509	1.2898	5.7289	1.4755	-1.4581	1.5499	0.79851	0.43899	3.5463	1.8878	5.8029	1.8253	8.3651	-1.4912	-2.2567	-12.345	1.9554	0	1	1.6352	197000	797	1.3707	1.2988	0.055312	2.8181
-6.5023	1.1893	-1.4979	1.9759	0.34656	2.657	-5.0441	0.98995	0.68471	1.1443	-5.577	1.5834	-4.6646	1.6222	1.8444	0.69868	-5.0111	1.0638	0.37958	0.96749	6.2617	0.96749	0.91241	0.64282	-6.509	1.1918	5.7289	0.64281	-1.4581	0.27609	-0.92532	0.4134	3.5463	1.0081	4.0791	1.2597	6.6413	-1.4912	-0.53283	-10.621	1.9554	0	5	1.59	64697	798	2.7075	2.35	0.15214	10.996
-6.5023	1.1651	-1.4979	2.5121	0.34656	2.8986	-5.0441	1.5085	0.68471	1.0339	-3.8531	1.0333	-4.6646	1.346	1.8444	0.49659	-5.0111	0.97088	0.37958	0.41164	4.5379	0.41164	-0.81142	0.91318	-6.509	1.1656	5.7289	0.91319	-1.4581	0.40896	-2.6491	0.69444	3.5463	0.9882	2.3553	1.6565	4.9174	-1.4912	1.191	-8.8973	1.9554	0	5	1.6919	45034	799	3.8979	3.3645	0.15853	22.791
-6.5023	0.90262	-1.4979	1.3273	0.34656	2.8986	-5.0441	1.2917	1.6571	1.2038	-7.3008	1.5617	-4.6646	2.4662	1.8444	1.8223	-5.0111	1.2301	0.37958	1.9543	8.9579	1.9543	2.6362	1.3395	-6.509	0.8876	6.7012	1.3395	-1.4581	1.4728	0.79851	0.18718	3.5463	1.7775	5.8029	1.747	9.3375	-1.4912	-2.2567	-12.345	1.9554	0	1	1.5309	158000	800	1.3704	1.2988	0.05517	2.8172
-6.5023	0.90702	-1.4979	1.6085	0.34656	2.5363	-5.0441	0.78252	1.6571	0.97449	-5.577	1.2835	-4.6646	1.5675	1.8444	0.82063	-5.0111	1.0394	0.37958	1.0791	7.2341	1.0792	0.91241	0.70788	-6.509	0.90418	6.7012	0.70788	-1.4581	0.26944	-0.92532	0.39519	3.5463	0.99179	4.0791	1.2505	7.6136	-1.4912	-0.53283	-10.621	1.9554	0	4	1.3487	57213	801	2.7069	2.3498	0.152	10.991
-6.5023	0.90284	-1.4979	2.2226	0.34656	2.7778	-5.0441	1.3011	1.6571	0.91716	-3.8531	0.8458	-4.6646	1.2429	1.8444	0.54709	-5.0111	0.97841	0.37958	0.45859	5.5102	0.45859	-0.81142	0.98729	-6.509	0.90436	6.7012	0.98729	-1.4581	0.43466	-2.6491	0.66987	3.5463	1.0302	2.3553	1.6331	5.8898	-1.4912	1.191	-8.8973	1.9554	0	5	1.4945	39969	802	3.8956	3.3636	0.15816	22.763
-6.5023	0.905	-1.4979	2.5353	0.34656	3.0194	-5.0441	1.6122	1.6571	1.0318	-2.1293	1.1055	-4.6646	1.253	1.8444	0.55534	-5.0111	1.2926	0.37958	0.58782	3.7864	0.58782	-2.5353	1.9121	-6.509	0.90773	6.7012	1.9121	-1.4581	0.23727	-4.373	1.2864	3.5463	1.122	0.63145	2.9535	4.166	-1.4912	2.9148	-7.1734	1.9554	0	4	1.7015	30193	803	4.3245	3.8889	0.112	28.052
-6.5023	0.64053	-1.4979	1.1766	0.34656	3.1401	-5.0441	1.2917	2.6295	0.91927	-7.3008	1.5648	-4.6646	2.9712	1.8444	2.1676	-5.0111	1.1776	0.37958	2.494	9.9303	2.494	2.6362	1.3213	-6.509	0.62103	7.6736	1.3213	-1.4581	1.7576	0.79851	0.15984	3.5463	1.6802	5.8029	1.6856	10.31	-1.4912	-2.2567	-12.345	1.9554	1	3	1.4555	124000	804	1.3704	1.2988	0.055128	2.8169
-6.5023	0.53974	-1.4979	1.2728	0.34656	2.5363	-5.0441	0.5751	2.6295	0.7473	-5.577	1.066	-4.6646	1.5968	1.8444	0.98684	-5.0111	1.0055	0.37958	1.2376	8.2065	1.2376	0.91241	0.7887	-6.509	0.54608	7.6736	0.78871	-1.4581	0.26415	-0.92532	0.37817	3.5463	0.94629	4.0791	1.2343	8.586	-1.4912	-0.53283	-10.621	1.9554	3	6	1.1229	45456	805	2.7067	2.3497	0.15194	10.989
-6.5023	0.53781	-1.4979	1.8506	0.34656	2.657	-5.0441	1.0937	2.6295	0.68998	-3.8531	0.65786	-4.6646	1.1472	1.8444	0.60741	-5.0111	0.93519	0.37958	0.51577	6.4826	0.51577	-0.81142	1.0916	-6.509	0.544	7.6736	1.0916	-1.4581	0.45846	-2.6491	0.65091	3.5463	1.0579	2.3553	1.5523	6.8622	-1.4912	1.191	-8.8973	1.9554	3	9	1.2478	31762	806	3.8947	3.3632	0.15803	22.753
-6.5023	0.65239	-1.4979	2.3491	0.34656	3.1401	-5.0441	1.4048	2.6295	0.97239	-2.1293	1.0887	-4.6646	1.3683	1.8444	0.73842	-5.0111	1.3234	0.37958	0.70426	4.7588	0.70426	-2.5353	2.2543	-6.509	0.65553	7.6736	2.2543	-1.4581	0.29005	-4.373	1.3499	3.5463	1.093	0.63145	3.1129	5.1384	-1.4912	2.9148	-7.1734	1.9554	1	6	1.6012	28461	807	4.32	3.8876	0.11123	27.994
-6.5023	1.0374	-1.4979	2.6481	0.34656	2.8986	-5.0441	1.8196	2.6295	1.3737	-0.40546	2.0359	-4.6646	1.2795	1.8444	0.56277	-5.0111	1.2909	0.37958	0.76684	3.0349	0.76684	-4.2591	3.3434	-6.509	1.04	7.6736	3.3434	-1.4581	0.28507	-6.0968	2.9452	3.5463	1.2184	-1.0924	4.6588	3.4145	-1.4912	4.6387	-5.4496	1.9554	0	2	1.9689	30320	808	4.405	3.9779	0.10737	29.106
-6.5023	0.40547	-1.4979	1.0556	0.34656	3.5025	-5.0441	1.3011	3.6019	1.0276	-7.3008	1.4534	-4.6646	3.3703	1.8444	2.6965	-5.0111	1.1323	0.37958	3.1455	10.903	3.1455	2.6362	1.4746	-6.509	0.42546	8.646	1.4746	-1.4581	1.9839	0.79851	0.16664	3.5463	1.6075	5.8029	1.6441	11.282	-1.4912	-2.2567	-12.345	1.9554	1	3	1.4576	92423	809	1.3703	1.2988	0.0551	2.8167
-6.5023	0.40547	-1.4979	0.93911	0.34656	2.657	-5.0441	0.47139	3.6019	0.62635	-5.577	0.78405	-4.6646	1.9508	1.8444	1.4466	-5.0111	0.94066	0.37958	1.6623	9.1788	1.6623	0.91241	1.0841	-6.509	0.40161	8.646	1.0842	-1.4581	0.26963	-0.92532	0.36197	3.5463	0.84179	4.0791	1.1914	9.5584	-1.4912	-0.53283	-10.621	1.9554	3	6	0.98057	29909	810	2.7066	2.3496	0.15192	10.989
-6.5023	0.38664	-1.4979	1.3355	0.34656	2.7155	-5.0441	0.75743	3.6019	0.4664	-3.8531	0.55932	-4.6646	1.1672	1.8444	0.79935	-5.0111	0.79125	0.37958	0.63041	7.455	0.63041	-0.81142	1.3737	-6.509	0.39217	8.646	1.3737	-1.4581	0.47066	-2.6491	0.63564	3.5463	1.0295	2.3553	1.2623	7.8346	-1.4912	1.191	-8.8973	1.9554	3	8	1.0368	164000	811	3.8943	3.3631	0.15797	22.749
-6.5023	0.42967	-1.4979	2.0802	0.34656	3.3544	-5.0441	1.3061	3.6019	1.1487	-2.1293	1.1662	-4.6646	1.5628	1.8444	1.0086	-5.0111	1.3259	0.37958	0.86296	5.7312	0.86296	-2.5353	2.7038	-6.509	0.43761	8.646	2.7037	-1.4581	0.34228	-4.373	1.4693	3.5463	1.0542	0.63145	3.2142	6.1108	-1.4912	2.9148	-7.1734	1.9554	1	3	1.5809	181000	812	4.3183	3.8871	0.11095	27.972
-6.5023	0.79072	-1.4979	2.45	0.34656	3.0194	-5.0441	1.6122	3.6019	1.7728	-0.40546	2.3047	-4.6646	1.3508	1.8444	0.66498	-5.0111	1.2933	0.37958	0.71551	4.0073	0.71551	-4.2591	3.6253	-6.509	0.79467	8.646	3.6253	-1.4581	0.29107	-6.0968	2.9317	3.5463	1.1494	-1.0924	4.6732	4.3869	-1.4912	4.6387	-5.4496	1.9554	0	4	1.9916	31438	813	4.3957	3.9753	0.10576	28.983
-6.5023	0.27245	1.0043	0.96145	4.8928	0.43995	-1.1974	0.88624	2.6295	0.80462	-5.577	0.43653	-2.6143	0.93771	3.8885	0.78258	-7.5072	1.1657	-1.4169	1.075	8.2065	1.075	2.9626	1.1448	-6.5028	0.27395	3.8269	1.1448	-5.3049	0.8559	-0.92532	0.030812	2.2018	1.7503	6.5813	1.5578	6.7896	1.0049	-4.3795	-6.7744	3.8051	3	5	0.63354	27238	1208	3.1887	3.1662	0.0070842	15.251
-6.5023	1.6923	-1.4979	2.2667	0.34656	2.5362	-3.1208	1.3482	-0.28768	1.8875	-5.577	1.16	-4.6646	1.7072	1.8444	2.1629	-5.0111	1.1152	-1.5438	2.2774	5.2893	2.2774	0.91241	1.674	-6.509	1.685	2.8331	1.674	-3.3815	1.3392	-0.92532	1.1856	1.6229	2.3024	4.0791	1.8162	3.7455	-1.4912	-2.4562	-8.6977	1.8274	0	0	1.8151	129000	815	3.2834	3.1184	0.052912	16.171
-6.5023	0.27426	1.0043	1.0133	4.8928	1.0438	0.72595	2.0836	3.6019	0.40546	-5.577	0.48213	-2.6143	1.3343	3.8885	1.3026	-7.5072	1.1191	-3.3403	1.361	9.1788	1.361	2.9626	1.5229	-6.5028	0.27578	2.8759	1.5229	-7.2282	2.2415	-0.92532	0.049206	0.27839	1.8464	6.5813	1.275	5.8386	1.0049	-6.3029	-4.851	3.3594	3	5	0.88377	37909	1222	3.206	3.1976	0.0026315	15.418
-6.5023	1.1874	-1.4979	2.0129	0.34656	2.657	-3.1208	1.0405	0.68471	1.3736	-5.577	1.0523	-4.6646	1.9872	1.8444	1.9715	-5.0111	0.96798	-1.5438	2.2015	6.2617	2.2015	0.91241	1.6195	-6.509	1.1884	3.8055	1.6195	-3.3815	1.3289	-0.92532	1.066	1.6229	2.3576	4.0791	1.8861	4.7179	-1.4912	-2.4562	-8.6977	1.8274	0	0	1.554	116000	817	3.2744	3.1171	0.050464	16.083
-6.5023	0.78934	-1.4979	1.8307	0.34656	3.1401	-3.1208	1.2446	1.6571	1.2611	-7.3008	0.62487	-4.6646	1.841	1.8444	1.7255	-5.0111	1.0433	-1.5438	1.3668	8.9579	1.3668	2.6362	1.5341	-6.509	0.79225	4.7779	1.5341	-3.3815	1.3623	0.79851	0.14222	1.6229	2.2024	5.8029	1.5872	7.4141	-1.4912	-4.18	-10.422	1.8274	1	2	1.4818	284000	818	1.43	1.4097	0.01438	3.0672
-6.5023	0.7975	-1.4979	1.7437	0.34656	2.7778	-3.1208	0.93342	1.6571	1.1465	-5.577	1.1602	-4.6646	2.366	1.8444	2.0043	-5.0111	0.81922	-1.5438	2.2299	7.2341	2.2299	0.91241	1.616	-6.509	0.80285	4.7779	1.616	-3.3815	1.4015	-0.92532	1.022	1.6229	2.3733	4.0791	1.9426	5.6903	-1.4912	-2.4562	-8.6977	1.8274	0	0	1.4265	98906	819	3.271	3.1166	0.049539	16.049
-6.5023	0.79229	-1.4979	1.8616	0.34656	2.5363	-3.1208	0.72597	1.6571	1.0318	-3.8531	1.2217	-4.6646	1.6114	1.8444	0.94941	-5.0111	0.61866	-1.5438	1.2142	5.5102	1.2142	-0.81142	0.78329	-6.509	0.7956	4.7779	0.78329	-3.3815	0.39771	-2.6491	0.46077	1.6229	1.1099	2.3553	1.0194	3.9664	-1.4912	-0.73237	-6.9739	1.8274	1	4	1.3616	31042	820	6.6006	5.7311	0.15172	65.352
-6.5023	0.51763	-1.4979	1.4526	0.34656	3.3817	-3.1208	1.452	2.6295	0.91927	-7.3008	0.72228	-4.6646	2.2472	1.8444	1.8444	-5.0111	0.8846	-1.5438	1.3821	9.9303	1.3821	2.6362	1.6074	-6.509	0.51895	5.7503	1.6074	-3.3815	1.2729	0.79851	0.13815	1.6229	2.3422	5.8029	1.48	8.3865	-1.4912	-4.18	-10.422	1.8274	2	4	1.4076	199000	821	1.4294	1.4097	0.014029	3.065
-6.5023	0.50881	-1.4979	1.41	0.34656	3.1401	-3.1208	1.1408	2.6295	0.91507	-5.577	1.4419	-4.6646	2.7003	1.8444	2.1329	-5.0111	0.70546	-1.5438	2.3491	8.2065	2.3491	0.91241	1.5687	-6.509	0.50643	5.7503	1.5687	-3.3815	1.4827	-0.92532	0.78403	1.6229	2.2874	4.0791	1.7978	6.6627	-1.4912	-2.4562	-8.6977	1.8274	1	3	1.4261	74493	822	3.2697	3.1165	0.049183	16.037
-6.5023	0.51033	-1.4979	1.4809	0.34656	2.5363	-3.1208	0.62226	2.6295	0.7473	-3.8531	1.1045	-4.6646	1.6838	1.8444	1.1251	-5.0111	0.4546	-1.5438	1.362	6.4826	1.362	-0.81142	0.84009	-6.509	0.51083	5.7503	0.84009	-3.3815	0.40882	-2.6491	0.44031	1.6229	0.95089	2.3553	0.9009	4.9388	-1.4912	-0.73237	-6.9739	1.8274	3	7	1.1669	23696	823	6.5971	5.7297	0.15138	65.282
-6.5023	0.39113	-1.4979	1.1571	0.34656	3.744	-3.1208	1.452	3.6019	0.91296	-7.3008	0.81096	-4.6646	2.7607	1.8444	2.224	-5.0111	0.78041	-1.5438	2.2439	10.903	2.2439	2.6362	1.8218	-6.509	0.39167	6.7226	1.8218	-3.3815	1.2499	0.79851	0.14689	1.6229	2.493	5.8029	1.4408	9.3589	-1.4912	-4.18	-10.422	1.8274	1	3	1.4114	137000	824	1.4292	1.4097	0.013893	3.0641
-6.5023	0.38989	-1.4979	0.93484	0.34656	3.5025	-3.1208	1.452	3.6019	0.97029	-5.577	1.4419	-4.6646	2.8006	1.8444	2.2858	-5.0111	0.59422	-1.5438	2.9107	9.1788	2.9107	0.91241	1.3851	-6.509	0.38948	6.7226	1.3851	-3.3815	1.6657	-0.92532	0.17113	1.6229	2.0991	4.0791	1.2707	7.6351	-1.4912	-2.4562	-8.6977	1.8274	1	4	1.4486	44807	825	3.2692	3.1164	0.049061	16.032
-6.5023	0.40547	-1.4979	0.94364	0.34656	2.7778	-3.1208	0.51857	3.6019	0.5117	-3.8531	0.84582	-4.6646	1.9152	1.8444	1.4442	-5.0111	0.31412	-1.5438	1.7174	7.455	1.7174	-0.81142	1.0031	-6.509	0.39887	6.7226	1.0031	-3.3815	0.42424	-2.6491	0.40547	1.6229	0.69149	2.3553	0.61239	5.9112	-1.4912	-0.73237	-6.9739	1.8274	3	9	1.0005	14352	826	6.5957	5.7292	0.15125	65.255
-6.5023	0.27463	-1.4979	0.71598	0.34656	1.5701	-3.1208	0.41486	3.6019	0.29082	-2.1293	1.066	-4.6646	2.2716	1.8444	1.8362	-5.0111	0.10154	-1.5438	1.7005	5.7312	1.7005	-2.5353	0.6129	-6.509	0.2747	6.7226	0.6129	-3.3815	0.21765	-4.373	0.77328	1.6229	0.58786	0.63145	0.77239	4.1874	-1.4912	0.99147	-5.2501	1.8274	4	10	0.72206	3572	827	9.7026	7.9982	0.2131	141.21
-6.5023	3.0294	-1.4979	3.0004	0.34656	2.4155	-1.1974	1.188	-0.28768	2.1167	-7.3008	1.0042	-4.6646	1.1214	1.8444	3.3245	-5.0111	1.7197	-3.4671	1.0564	7.0131	1.0564	2.6362	1.8211	-6.509	2.9934	0.90975	1.8211	-5.3049	2.5333	0.79851	1.6299	-0.30042	2.3118	5.8029	1.8008	3.546	-1.4912	-6.1034	-8.4982	1.2989	0	0	2.1257	623000	828	1.4772	1.428	0.034481	3.2733
-6.5023	0.63821	1.0043	1.2299	2.6197	1.7124	-1.1974	1.3011	3.6019	0.97029	-7.3008	0.44286	-4.8875	1.8458	1.6154	1.8138	-7.5072	1.6903	-3.69	1.8124	10.903	1.8124	2.4133	1.4787	-6.5028	0.62827	4.7993	1.4787	-5.3049	1.8175	0.79851	0.17863	2.2018	1.9494	8.3051	1.9001	7.2126	1.0049	-6.1034	-8.4982	1.7091	2	4	1.0491	192000	1134	1.468	1.4646	0.0023745	3.2327
-6.5023	0.40547	1.0043	1.0572	2.6197	2.0747	-1.1974	1.2917	3.6019	0.40546	-5.577	0.8087	-4.8875	2.4645	1.6154	2.3096	-7.5072	1.1838	-3.69	1.5231	9.1788	1.5231	0.68951	1.6737	-6.5028	0.40521	4.7993	1.6737	-5.3049	1.103	-0.92532	0.17986	2.2018	1.8109	6.5813	1.5408	5.4888	1.0049	-4.3795	-6.7744	1.7091	2	4	1.0072	66283	1135	3.458	3.4296	0.008276	17.937
-6.5023	1.2225	-1.4979	2.4701	0.34656	2.657	-1.1974	0.98058	1.6571	0.97449	-5.577	0.81358	-4.6646	2.0193	1.8444	2.6257	-5.0111	1.246	-3.4671	1.3683	7.2341	1.3683	0.91241	1.7653	-6.509	1.2247	2.8545	1.7653	-5.3049	1.7879	-0.92532	1.2164	-0.30042	3.0826	4.0791	2.3155	3.7669	-1.4912	-4.3795	-6.7744	1.2989	0	0	1.5197	198000	831	3.3889	3.3094	0.024004	17.227
-6.5023	0.37865	1.0043	1.0522	4.8928	1.4061	-1.1974	1.1974	1.6571	1.6624	-5.577	0.69008	-2.6143	1.5278	3.8885	1.4763	-7.5072	1.2458	-1.4169	1.9788	7.2341	1.9788	2.9626	1.9644	-6.5028	0.37629	2.8545	1.9644	-5.3049	1.0372	-0.92532	0.11754	2.2018	1.7369	6.5813	1.4933	5.8172	1.0049	-4.3795	-6.7744	3.8051	2	4	1.0645	61592	1205	3.1898	3.1663	0.0074427	15.263
-6.5023	0.78381	-1.4979	2.2297	0.34656	2.8986	-1.1974	1.1974	2.6295	0.7473	-5.577	0.90756	-4.6646	2.3925	1.8444	2.4294	-5.0111	1.1719	-3.4671	1.4258	8.2065	1.4258	0.91241	1.7618	-6.509	0.78652	3.8269	1.7618	-5.3049	1.7156	-0.92532	0.99464	-0.30042	3.4086	4.0791	2.4035	4.7393	-1.4912	-4.3795	-6.7744	1.2989	1	1	1.4607	155000	833	3.3804	3.3089	0.021592	17.14
-6.5023	0.66546	-1.4979	1.8375	0.34656	3.1401	-1.1974	1.5085	3.6019	1.0276	-7.3008	0.53498	-4.6646	1.8524	1.8444	1.6908	-5.0111	1.0236	-3.4671	1.9351	10.903	1.9351	2.6362	1.4843	-6.509	0.67095	4.7993	1.4843	-5.3049	2.1253	0.79851	0.14747	-0.30042	3.219	5.8029	1.5937	7.4355	-1.4912	-6.1034	-8.4982	1.2989	2	4	1.4524	234000	834	1.4385	1.4266	0.0083246	3.1038
-6.5023	0.40547	-1.4979	1.8799	0.34656	3.2609	-1.1974	1.6122	3.6019	0.62635	-5.577	1.16	-4.6646	2.6601	1.8444	2.3096	-5.0111	1.1136	-3.4671	1.619	9.1788	1.619	0.91241	1.7775	-6.509	0.40376	4.7993	1.7775	-5.3049	1.649	-0.92532	0.52565	-0.30042	3.6571	4.0791	2.2535	5.7117	-1.4912	-4.3795	-6.7744	1.2989	2	4	1.4908	106000	835	3.3772	3.3087	0.020681	17.108
-6.5023	0.52405	-1.4979	2.0196	0.34656	3.1401	-1.1974	1.8196	3.6019	0.85564	-3.8531	1.6916	-4.6646	3.3342	1.8444	3.1423	-5.0111	0.92252	-3.4671	1.7372	7.455	1.7371	-0.81142	1.8593	-6.509	0.52725	4.7993	1.8593	-5.3049	2.4041	-2.6491	1.7984	-0.30042	3.4758	2.3553	2.5944	3.9879	-1.4912	-2.6557	-5.0506	1.2989	1	2	1.6751	31465	836	7.642	7.0599	0.082448	87.6
-6.5023	3.0088	-1.4979	2.9869	0.34656	2.4155	0.72595	1.0465	1.6571	1.0318	-7.3008	1.0042	-4.6646	1.1244	1.8444	3.2893	-5.0111	1.7188	-5.3905	1.3933	8.9579	1.3933	2.6362	1.8162	-6.509	2.9519	0.93113	1.8162	-7.2282	4.428	0.79851	1.5984	-2.2238	4.1169	5.8029	1.7927	3.5674	-1.4912	-8.0268	-6.5748	0.47807	0	0	1.9156	618000	837	1.4771	1.429	0.033724	3.2729
-6.5023	0.40547	1.0043	0.90823	4.8928	5.9956	0.72595	3.5356	3.6019	0.2335	-3.8531	3.1964	-2.6143	7.0716	3.8885	7.2298	-7.5072	0.77688	-3.3403	3.278	7.455	3.278	1.2388	3.8755	-6.5028	0.40496	2.8759	3.8755	-7.2282	3.6847	-2.6491	3.4299	0.27839	3.356	4.8575	2.9565	4.1147	1.0049	-4.5791	-3.1272	3.3594	2	3	2.3791	9742	1223	7.5491	7.4773	0.0096107	85.484
-6.5023	0.64929	3.5066	2.9161	4.8928	1.7685	-1.1974	1.1974	3.6019	0.91296	-7.3008	0.45701	-5.116	1.7093	1.3863	1.8521	-10.009	3.9349	-3.9186	1.722	10.903	1.722	2.1848	1.3954	-6.5023	0.64528	4.7993	1.3954	-5.3049	1.7615	0.79851	0.21218	4.704	2.311	10.807	3.8781	6.9841	3.5066	-6.1034	-8.4982	1.6022	2	4	1.3169	195000	1347	1.4995	1.4963	0.0021827	3.3729
-6.5023	1.1953	-1.4979	2.4905	0.34656	2.657	0.72595	2.3948	3.6019	1.2569	-5.577	0.80976	-4.6646	2.0433	1.8444	2.6682	-5.0111	1.2656	-5.3905	0.9064	9.1788	0.9064	0.91241	1.7737	-6.509	1.1998	2.8759	1.7737	-7.2282	3.5953	-0.92532	1.2244	-2.2238	4.9963	4.0791	2.3747	3.7883	-1.4912	-6.3029	-4.851	0.47807	0	0	1.8007	200000	840	3.3985	3.3225	0.022861	17.325
-6.5023	0.89852	-1.4979	1.5052	2.6197	1.4806	-6.9675	1.7206	-0.28768	2.3997	-5.577	1.1951	-2.3914	1.3784	4.1176	1.2364	-5.0111	1.2122	4.5761	1.7389	5.2893	1.7389	3.1856	1.0818	-6.509	0.8902	6.6798	1.0818	0.46522	1.0528	-0.92532	1.3971	5.4697	1.3783	4.0791	1.5846	9.8654	-1.4912	1.3905	-12.544	4.1165	0	0	1.5333	781000	841	1.4251	1.3026	0.094091	3.0464
-6.5023	0.75553	-1.4979	1.357	2.6197	1.4806	-6.9675	3.1609	-0.28768	2.6271	-3.8531	2.5521	-2.3914	1.5718	4.1176	1.3636	-5.0111	0.93258	4.5761	4.09	3.5655	4.09	1.4617	1.3336	-6.509	0.7575	6.6798	1.3336	0.46522	2.4382	-2.6491	3.1374	5.4697	1.7776	2.3553	2.7749	8.1416	-1.4912	3.1144	-10.821	4.1165	0	0	1.9889	1650000	842	1.5585	1.5049	0.035593	3.6434
-6.5023	1.0626	-1.4979	2.0061	2.6197	1.8332	-6.9675	4.6764	-0.28768	2.6326	-2.1293	4.2663	-2.3914	2.0441	4.1176	2.4897	-5.0111	1.1067	4.5761	6.7902	1.8416	6.7902	-0.26211	1.8095	-6.509	1.0668	6.6798	1.8095	0.46522	3.2577	-4.373	4.9897	5.4697	2.4524	0.63145	5.6898	6.4177	-1.4912	4.8382	-9.0968	4.1165	0	0	2.7462	351000	843	1.5873	1.554	0.021414	3.7792
-6.5023	2.0974	-1.4979	2.6076	2.6197	2.4371	-6.9675	5.7135	-0.28768	2.346	-0.40546	5.8128	-2.3914	2.6005	4.1176	4.4172	-5.0111	1.414	4.5761	8.0198	0.11778	8.0198	-1.9859	2.835	-6.509	2.0882	6.6798	2.835	0.46522	3.2724	-6.0968	7.4052	5.4697	3.0403	-1.0924	7.9544	4.6939	-1.4912	6.562	-7.373	4.1165	0	0	3.5024	503000	844	1.6005	1.5602	0.025827	3.8425
-6.5023	0.63828	-1.4979	1.2946	2.6197	1.4709	-6.9675	1.4613	0.68471	1.6029	-5.577	1.0594	-2.3914	1.2777	4.1176	1.0255	-5.0111	1.1368	4.5761	1.359	6.2617	1.359	3.1856	1.0128	-6.509	0.60845	7.6522	1.0128	0.46522	1.0109	-0.92532	1.3304	5.4697	1.3201	4.0791	1.4361	10.838	-1.4912	1.3905	-12.544	4.1165	1	2	1.2546	82976	845	1.4251	1.3025	0.094066	3.0462
-6.5023	0.5071	-1.4979	1.0876	2.6197	1.4277	-6.9675	2.7059	0.68471	1.7176	-3.8531	2.3562	-2.3914	1.3799	4.1176	1.0973	-5.0111	0.87352	4.5761	2.9225	4.5379	2.9225	1.4617	1.5642	-6.509	0.48357	7.6522	1.5642	0.46522	2.3924	-2.6491	3.1086	5.4697	1.5831	2.3553	2.6098	9.1139	-1.4912	3.1144	-10.821	4.1165	1	2	1.6337	159000	846	1.5583	1.5049	0.035455	3.6423
-6.5023	0.65409	-1.4979	1.6578	2.6197	1.5916	-6.9675	4.0541	0.68471	1.7749	-2.1293	4.2549	-2.3914	1.5843	4.1176	1.5401	-5.0111	0.96	4.5761	5.5889	2.814	5.5889	-0.26211	2.2057	-6.509	0.65536	7.6522	2.2057	0.46522	3.202	-4.373	4.8699	5.4697	2.2178	0.63145	5.1704	7.3901	-1.4912	4.8382	-9.0968	4.1165	1	2	2.3312	272000	847	1.586	1.5539	0.020632	3.7731
-6.5023	1.454	-1.4979	2.2688	2.6197	2.0747	-6.9675	5.195	0.68471	1.6029	-0.40546	5.9851	-2.3914	2.4	4.1176	3.3351	-5.0111	1.2406	4.5761	7.5173	1.0902	7.5173	-1.9859	3.1308	-6.509	1.4554	7.6522	3.1308	0.46522	3.3271	-6.0968	6.9154	5.4697	2.7058	-1.0924	7.7432	5.6663	-1.4912	6.562	-7.373	4.1165	0	0	3.0968	418000	848	1.5934	1.5598	0.021537	3.8084
-6.5023	0.39711	-1.4979	0.92454	2.6197	1.4709	-6.9675	2.362	1.6571	1.2038	-3.8531	2.2629	-2.3914	1.355	4.1176	1.0495	-5.0111	0.82904	4.5761	2.2676	5.5102	2.2676	1.4617	1.6884	-6.509	0.39886	8.6246	1.6884	0.46522	2.284	-2.6491	3.0814	5.4697	1.4431	2.3553	2.4954	10.086	-1.4912	3.1144	-10.821	4.1165	1	2	1.4369	116000	849	1.5582	1.5049	0.035407	3.6419
-6.5023	0.40547	-1.4979	1.2884	2.6197	1.5485	-6.9675	3.6393	1.6571	1.2038	-2.1293	4.0733	-2.3914	1.3034	4.1176	1.1229	-5.0111	0.83175	4.5761	4.2687	3.7864	4.2687	-0.26211	2.6482	-6.509	0.40342	8.6246	2.6482	0.46522	3.1357	-4.373	4.8319	5.4697	2.0971	0.63145	4.6967	8.3625	-1.4912	4.8382	-9.0968	4.1165	1	2	2.0265	197000	850	1.5855	1.5539	0.020338	3.7708
-6.5023	0.96931	-1.4979	1.9553	2.6197	1.79	-6.9675	4.5727	1.6571	1.2611	-0.40546	6.0762	-2.3914	1.9281	4.1176	2.2418	-5.0111	1.0717	4.5761	6.593	2.0625	6.593	-1.9859	3.519	-6.509	0.96547	8.6246	3.519	0.46522	3.3093	-6.0968	6.6717	5.4697	2.4063	-1.0924	7.3588	6.6386	-1.4912	6.562	-7.373	4.1165	0	0	2.7708	332000	851	1.5907	1.5597	0.019906	3.7955
-6.5023	0.3817	-1.4979	0.81052	2.6197	1.5916	-6.9675	1.9799	2.6295	0.80462	-3.8531	2.1617	-2.3914	1.4153	4.1176	1.0816	-5.0111	0.795	4.5761	1.9917	6.4826	1.9917	1.4617	1.9503	-6.509	0.37507	9.597	1.9503	0.46522	2.1174	-2.6491	3.0553	5.4697	1.3683	2.3553	2.3624	11.059	-1.4912	3.1144	-10.821	4.1165	1	2	1.2883	78402	852	1.5581	1.5049	0.035387	3.6417
-6.5023	0.40233	-1.4979	0.9851	2.6197	1.5916	-6.9675	3.2244	2.6295	0.86194	-2.1293	3.8897	-2.3914	1.2283	4.1176	1.0081	-5.0111	0.73917	4.5761	3.2232	4.7588	3.2232	-0.26211	3.1299	-6.509	0.39896	9.597	3.1299	0.46522	3.0006	-4.373	4.8081	5.4697	1.9368	0.63145	4.3652	9.3349	-1.4912	4.8382	-9.0968	4.1165	1	3	1.8259	138000	853	1.5853	1.5539	0.02023	3.7699
-6.5023	0.52917	-1.4979	1.5577	2.6197	1.5916	-6.9675	3.9504	2.6295	0.97239	-0.40546	5.9042	-2.3914	1.4653	4.1176	1.3776	-5.0111	0.9553	4.5761	5.3212	3.0349	5.3212	-1.9859	3.9864	-6.509	0.53397	9.597	3.9864	0.46522	3.2577	-6.0968	6.5726	5.4697	2.224	-1.0924	6.8477	7.611	-1.4912	6.562	-7.373	4.1165	1	2	2.4176	253000	854	1.5897	1.5596	0.019281	3.7906
-6.5023	0.38887	-1.4979	0.78082	2.6197	1.7124	-6.9675	2.911	3.6019	0.79831	-2.1293	3.8853	-2.3914	1.2512	4.1176	1.0299	-5.0111	0.68487	4.5761	2.4871	5.7312	2.4871	-0.26211	3.5778	-6.509	0.38983	10.569	3.5778	0.46522	2.8443	-4.373	4.7931	5.4697	1.8013	0.63145	4.1086	10.307	-1.4912	4.8382	-9.0968	4.1165	1	3	1.7461	90132	855	1.5853	1.5539	0.020189	3.7696
-6.5023	0.40547	-1.4979	1.2115	2.6197	1.5916	-6.9675	3.6393	3.6019	1.0849	-0.40546	5.7938	-2.3914	1.2386	4.1176	1.0611	-5.0111	0.84006	4.5761	4.0903	4.0073	4.0903	-1.9859	4.5609	-6.509	0.40077	10.569	4.5609	0.46522	3.1835	-6.0968	6.5447	5.4697	2.118	-1.0924	6.3722	8.5834	-1.4912	6.562	-7.373	4.1165	1	2	2.2878	179000	856	1.5893	1.5596	0.019048	3.7888
-6.5023	0.90199	-1.4979	1.2231	2.6197	1.4277	-5.0441	1.3801	-0.28768	2.5753	-7.3008	1.46	-2.3914	1.5371	4.1176	1.2024	-5.0111	1.1777	2.6527	1.9623	7.0131	1.9623	4.9094	2.2085	-6.509	0.88492	4.7565	2.2085	-1.4581	1.5475	0.79851	0.20705	3.5463	1.82	5.8029	1.6473	9.6658	-1.4912	-2.2567	-12.345	4.0928	0	1	1.4947	160000	857	1.2827	1.2209	0.050656	2.4681
-6.5023	0.79031	-1.4979	1.6879	2.6197	1.4709	-5.0441	0.77315	-0.28768	2.2887	-5.577	1.16	-2.3914	1.31	4.1176	1.281	-5.0111	1.0293	2.6527	1.0188	5.2893	1.0188	3.1856	1.547	-6.509	0.79339	4.7565	1.5469	-1.4581	0.37242	-0.92532	0.3889	3.5463	1.1258	4.0791	1.1359	7.942	-1.4912	-0.53283	-10.621	4.0928	0	2	1.3618	74146	858	2.5336	2.2469	0.1276	9.6284
-6.5023	0.77417	-1.4979	1.7358	2.6197	1.5916	-5.0441	1.3011	-0.28768	2.518	-3.8531	1.1469	-2.3914	1.5011	4.1176	1.4917	-5.0111	0.96975	2.6527	1.9834	3.5655	1.9834	1.4617	1.2308	-6.509	0.77242	4.7565	1.2308	-1.4581	0.90319	-2.6491	1.2349	3.5463	1.1654	2.3553	1.8232	6.2182	-1.4912	1.191	-8.8973	4.0928	0	0	1.5113	55518	859	3.6455	3.2976	0.1055	19.935
-6.5023	0.93024	-1.4979	2.07	2.6197	2.0747	-5.0441	2.3382	-0.28768	2.5753	-2.1293	2.8516	-2.3914	2.5423	4.1176	3.0226	-5.0111	0.97539	2.6527	5.5625	1.8416	5.5625	-0.26211	1.1159	-6.509	0.93541	4.7565	1.1159	-1.4581	1.9284	-4.373	3.1752	3.5463	1.7598	0.63145	4.1167	4.4944	-1.4912	2.9148	-7.1734	4.0928	0	0	2.14	93134	860	4.0442	3.8511	0.050139	24.533
-6.5023	0.64422	-1.4979	1.0884	2.6197	1.4277	-5.0441	1.3954	0.68471	1.7176	-7.3008	1.3769	-2.3914	1.4939	4.1176	1.0973	-5.0111	1.1331	2.6527	1.7062	7.9855	1.7062	4.9094	1.838	-6.509	0.63624	5.7289	1.838	-1.4581	1.8068	0.79851	0.10853	3.5463	1.7373	5.8029	1.6031	10.638	-1.4912	-2.2567	-12.345	4.0928	1	3	1.275	123000	861	1.2827	1.2209	0.050603	2.4678
-6.5023	0.52494	-1.4979	1.3774	2.6197	1.4277	-5.0441	0.5751	0.68471	1.6603	-5.577	0.97201	-2.3914	1.2574	4.1176	1.0869	-5.0111	0.96924	2.6527	0.94143	6.2617	0.94142	3.1856	1.2462	-6.509	0.52803	5.7289	1.2462	-1.4581	0.37885	-0.92532	0.32493	3.5463	1.0425	4.0791	1.0489	8.9144	-1.4912	-0.53283	-10.621	4.0928	2	5	1.0896	63952	862	2.5334	2.2468	0.12756	9.6271
-6.5023	0.43864	-1.4979	1.4306	2.6197	1.5485	-5.0441	1.0937	0.68471	1.7176	-3.8531	0.96557	-2.3914	1.3151	4.1176	1.1561	-5.0111	0.92558	2.6527	1.5089	4.5379	1.5089	1.4617	1.0852	-6.509	0.44667	5.7289	1.0852	-1.4581	0.85014	-2.6491	1.1603	3.5463	1.0456	2.3553	1.6448	7.1906	-1.4912	1.191	-8.8973	4.0928	1	2	1.1991	45496	863	3.6448	3.2974	0.10536	19.927
-6.5023	0.63765	-1.4979	1.7786	2.6197	1.8332	-5.0441	1.9234	0.68471	2.0615	-2.1293	2.7649	-2.3914	2.0044	4.1176	1.9517	-5.0111	0.84926	2.6527	4.3878	2.814	4.3878	-0.26211	1.1481	-6.509	0.62738	5.7289	1.1481	-1.4581	1.914	-4.373	2.9653	3.5463	1.6998	0.63145	3.713	5.4667	-1.4912	2.9148	-7.1734	4.0928	1	2	1.8332	74764	864	4.0407	3.8506	0.049376	24.491
-6.5023	1.1895	-1.4979	2.2339	2.6197	2.3163	-5.0441	2.8568	0.68471	1.3205	-0.40546	4.5151	-2.3914	3.2414	4.1176	4.0629	-5.0111	1.0664	2.6527	6.5217	1.0902	6.5217	-1.9859	0.9513	-6.509	1.1914	5.7289	0.9513	-1.4581	2.0579	-6.0968	5.2691	3.5463	1.8093	-1.0924	6.2237	3.7429	-1.4912	4.6387	-5.4496	4.0928	0	0	2.4053	110000	865	4.1153	3.9396	0.044605	25.404
-6.5023	0.40547	-1.4979	1.077	2.6197	1.4277	-5.0441	0.56573	1.6571	1.2611	-5.577	0.71961	-2.3914	1.2323	4.1176	0.97629	-5.0111	0.87792	2.6527	0.89667	7.2341	0.89667	3.1856	1.0435	-6.509	0.40199	6.7012	1.0435	-1.4581	0.39471	-0.92532	0.26703	3.5463	0.92501	4.0791	0.94994	9.8868	-1.4912	-0.53283	-10.621	4.0928	3	6	0.90943	48814	866	2.5333	2.2468	0.12754	9.6266
-6.5023	0.40547	-1.4979	1.1391	2.6197	1.5485	-5.0441	0.98995	1.6571	1.2038	-3.8531	0.75184	-2.3914	1.1469	4.1176	0.95952	-5.0111	0.8617	2.6527	1.0891	5.5102	1.0891	1.4617	0.98431	-6.509	0.39946	6.7012	0.98431	-1.4581	0.73126	-2.6491	1.0641	3.5463	0.88492	2.3553	1.4195	8.163	-1.4912	1.191	-8.8973	4.0928	1	3	1.0064	33271	867	3.6446	3.2974	0.1053	19.924
-6.5023	0.40547	-1.4979	1.3504	2.6197	1.7124	-5.0441	1.6122	1.6571	1.4904	-2.1293	2.4418	-2.3914	1.5136	4.1176	1.2981	-5.0111	0.63984	2.6527	2.9354	3.7864	2.9354	-0.26211	1.1883	-6.509	0.40088	6.7012	1.1883	-1.4581	1.934	-4.373	2.9129	3.5463	1.5425	0.63145	3.0806	6.4391	-1.4912	2.9148	-7.1734	4.0928	1	3	1.5021	49749	868	4.0394	3.8504	0.049094	24.476
-6.5023	0.79236	-1.4979	1.9955	2.6197	2.0747	-5.0441	2.3382	1.6571	1.1464	-0.40546	4.7634	-2.3914	2.6072	4.1176	2.9608	-5.0111	0.96105	2.6527	5.6626	2.0625	5.6626	-1.9859	1.197	-6.509	0.79546	6.7012	1.197	-1.4581	2.0542	-6.0968	4.8606	3.5463	1.7942	-1.0924	5.9811	4.7153	-1.4912	4.6387	-5.4496	4.0928	0	0	2.1851	92543	869	4.1081	3.9387	0.043015	25.315
-6.5023	0.38753	-1.4979	0.83368	2.6197	1.4709	-5.0441	0.47139	2.6295	0.86194	-5.577	0.55008	-2.3914	1.2575	4.1176	0.92412	-5.0111	0.78045	2.6527	0.93912	8.2065	0.93913	3.1856	0.91132	-6.509	0.38634	7.6736	0.91132	-1.4581	0.39436	-0.92532	0.25346	3.5463	0.77978	4.0791	0.8742	10.859	-1.4912	-0.53283	-10.621	4.0928	3	6	0.76258	33550	870	2.5333	2.2468	0.12754	9.6264
-6.5023	0.31843	-1.4979	0.9476	2.6197	1.5605	-5.0441	0.82602	2.6295	0.80924	-3.8531	0.68363	-2.3914	1.1174	4.1176	0.81991	-5.0111	0.77945	2.6527	0.88066	6.4826	0.88066	1.4617	1.0276	-6.509	0.31897	7.6736	1.0276	-1.4581	0.66775	-2.6491	1.0239	3.5463	0.86403	2.3553	1.2697	9.1354	-1.4912	1.191	-8.8973	4.0928	2	4	0.85756	170000	871	3.6445	3.2973	0.10529	19.923
-6.5023	0.31845	-1.4979	0.85502	2.6197	1.5605	-5.0441	1.8548	2.6295	0.80924	-2.1293	1.9103	-2.3914	1.1489	4.1176	0.90359	-5.0111	0.41921	2.6527	1.7259	4.7588	1.7259	-0.26211	1.7552	-6.509	0.31856	7.6736	1.7552	-1.4581	1.9816	-4.373	2.8499	3.5463	1.228	0.63145	2.7373	7.4115	-1.4912	2.9148	-7.1734	4.0928	1	3	1.218	212000	872	4.0389	3.8504	0.048971	24.469
-6.5023	0.41717	-1.4979	1.6967	2.6197	1.8332	-5.0441	1.8196	2.6295	0.85774	-0.40546	4.4903	-2.3914	1.9282	4.1176	1.7733	-5.0111	0.82665	2.6527	4.3256	3.0349	4.3256	-1.9859	1.7059	-6.509	0.42801	7.6736	1.7059	-1.4581	2.0455	-6.0968	4.6504	3.5463	1.7244	-1.0924	5.4421	5.6877	-1.4912	4.6387	-5.4496	4.0928	1	2	1.8525	68825	873	4.1054	3.9384	0.042421	25.282
-6.5023	0.27385	-1.4979	0.76412	2.6197	1.8332	-5.0441	0.67881	3.6019	0.74099	-3.8531	0.75182	-2.3914	1.166	4.1176	1.0104	-5.0111	0.72208	2.6527	0.7729	7.455	0.7729	1.4617	1.5427	-6.509	0.27289	8.646	1.5427	-1.4581	0.26379	-2.6491	1.0031	3.5463	0.76467	2.3553	1.1605	10.108	-1.4912	1.191	-8.8973	4.0928	3	6	0.84046	14106	874	3.6444	3.2973	0.10527	19.923
-6.5023	0.27363	-1.4979	0.65819	2.6197	1.7124	-5.0441	1.8196	3.6019	0.62635	-2.1293	2.0353	-2.3914	1.1502	4.1176	0.90129	-5.0111	0.38607	2.6527	1.5307	5.7312	1.5307	-0.26211	2.3343	-6.509	0.27192	8.646	2.3343	-1.4581	1.974	-4.373	2.8309	3.5463	1.1886	0.63145	2.6868	8.3839	-1.4912	2.9148	-7.1734	4.0928	3	5	1.1876	16706	875	4.0388	3.8503	0.04894	24.467
-6.5023	0.39897	-1.4979	1.2041	2.6197	1.6693	-5.0441	1.8196	3.6019	0.68367	-0.40546	4.0115	-2.3914	1.3385	4.1176	1.1095	-5.0111	0.58586	2.6527	2.651	4.0073	2.651	-1.9859	2.7601	-6.509	0.39885	8.646	2.7601	-1.4581	2.1003	-6.0968	4.596	3.5463	1.5042	-1.0924	4.7494	6.6601	-1.4912	4.6387	-5.4496	4.0928	2	4	1.6312	40164	876	4.1044	3.9382	0.042195	25.269
-6.5023	0.86103	-1.4979	1.7171	2.6197	1.6693	-3.1208	1.3482	-0.28768	2.8046	-7.3008	0.61678	-2.3914	1.5729	4.1176	1.5598	-5.0111	0.9724	0.72936	2.6391	7.0131	2.6391	4.9094	2.2669	-6.509	0.8487	2.8331	2.2669	-3.3815	1.4197	0.79851	0.13644	1.6229	2.2849	5.8029	1.4906	7.7425	-1.4912	-4.18	-10.422	3.9448	1	2	1.5028	279000	877	1.3383	1.3185	0.014994	2.6865
-6.5023	0.77777	-1.4979	1.632	2.6197	1.79	-3.1208	1.0371	-0.28768	2.8046	-5.577	1.1895	-2.3914	1.9965	4.1176	1.9065	-5.0111	0.79364	0.72936	2.5959	5.2893	2.5959	3.1856	3.0803	-6.509	0.77692	2.8331	3.0803	-3.3815	1.4304	-0.92532	1.062	1.6229	2.4065	4.0791	1.9419	6.0187	-1.4912	-2.4562	-8.6977	3.9448	0	0	1.5385	105000	878	3.0608	2.9247	0.046539	14.053
-6.5023	0.7842	-1.4979	1.8738	2.6197	1.5485	-3.1208	0.72597	-0.28768	2.5753	-3.8531	1.2024	-2.3914	1.635	4.1176	1.7939	-5.0111	0.73683	0.72936	1.3741	3.5655	1.3741	1.4617	2.1277	-6.509	0.78572	2.8331	2.1277	-3.3815	0.52795	-2.6491	0.46131	1.6229	1.3957	2.3553	1.1982	4.2948	-1.4912	-0.73237	-6.9739	3.9448	1	4	1.4517	41564	879	6.1719	5.445	0.1335	57.139
-6.5023	0.52416	-1.4979	1.3273	2.6197	1.5485	-3.1208	1.452	0.68471	1.8322	-7.3008	0.62356	-2.3914	1.32	4.1176	1.1022	-5.0111	0.83881	0.72936	1.8571	7.9855	1.8571	4.9094	1.7994	-6.509	0.52515	3.8055	1.7994	-3.3815	1.3254	0.79851	0.05532	1.6229	2.3789	5.8029	1.336	8.7149	-1.4912	-4.18	-10.422	3.9448	2	4	1.2179	201000	880	1.3379	1.3185	0.014694	2.6849
-6.5023	0.40547	-1.4979	1.2599	2.6197	1.5916	-3.1208	1.2445	0.68471	2.0615	-5.577	1.4714	-2.3914	1.6327	4.1176	1.3841	-5.0111	0.68719	0.72936	2.1358	6.2617	2.1358	3.1856	2.4711	-6.509	0.41204	3.8055	2.4711	-3.3815	1.5639	-0.92532	0.74054	1.6229	2.3197	4.0791	1.7528	6.991	-1.4912	-2.4562	-8.6977	3.9448	1	4	1.3391	77774	881	3.0599	2.9246	0.046255	14.044
-6.5023	0.517	-1.4979	1.5313	2.6197	1.4709	-3.1208	0.62228	0.68471	1.9469	-3.8531	1.097	-2.3914	1.51	4.1176	1.4536	-5.0111	0.58806	0.72936	1.189	4.5379	1.189	1.4617	1.7587	-6.509	0.51842	3.8055	1.7587	-3.3815	0.53749	-2.6491	0.38307	1.6229	1.2503	2.3553	1.0067	5.2672	-1.4912	-0.73237	-6.9739	3.9448	2	6	1.1976	32978	882	6.1692	5.444	0.1332	57.088
-6.5023	0.64856	-1.4979	1.3335	2.6197	2.4371	-3.1208	0.82968	0.68471	2.0615	-2.1293	1.8478	-2.3914	4.0528	4.1176	4.1511	-5.0111	0.27095	0.72936	4.5465	2.814	4.5465	-0.26211	2.5534	-6.509	0.64892	3.8055	2.5534	-3.3815	0.87031	-4.373	1.8565	1.6229	1.6465	0.63145	1.6263	3.5434	-1.4912	0.99147	-5.2501	3.9448	1	3	1.5263	17134	883	9.0521	7.7237	0.17199	122.91
-6.5023	0.40547	-1.4979	1.0438	2.6197	1.5916	-3.1208	1.452	1.6571	1.2611	-7.3008	0.6174	-2.3914	1.2855	4.1176	0.9953	-5.0111	0.75277	0.72936	1.4228	8.9579	1.4228	4.9094	1.6296	-6.509	0.40556	4.7779	1.6296	-3.3815	1.3076	0.79851	0.036641	1.6229	2.4316	5.8029	1.2403	9.6872	-1.4912	-4.18	-10.422	3.9448	2	4	1.0619	142000	884	1.3377	1.3185	0.014589	2.6843
-6.5023	0.40547	-1.4979	0.89161	2.6197	1.4709	-3.1208	1.5557	1.6571	1.2038	-5.577	1.2539	-2.3914	1.2872	4.1176	1.0212	-5.0111	0.58016	0.72936	1.6503	7.2341	1.6503	3.1856	1.7823	-6.509	0.40041	4.7779	1.7823	-3.3815	1.983	-0.92532	0.10143	1.6229	2.1392	4.0791	1.244	7.9634	-1.4912	-2.4562	-8.6977	3.9448	1	4	1.1302	47335	885	3.0595	2.9246	0.046139	14.041
-6.5023	0.40547	-1.4979	1.1036	2.6197	1.3501	-3.1208	0.62226	1.6571	1.3758	-3.8531	0.76509	-2.3914	1.3748	4.1176	1.1329	-5.0111	0.44474	0.72936	1.0219	5.5102	1.0219	1.4617	1.2856	-6.509	0.40044	4.7779	1.2856	-3.3815	0.55008	-2.6491	0.29694	1.6229	1.0479	2.3553	0.70132	6.2396	-1.4912	-0.73237	-6.9739	3.9448	2	7	0.93704	22185	886	6.1681	5.4437	0.13308	57.069
-6.5023	0.51384	-1.4979	0.96757	2.6197	2.0747	-3.1208	1.1408	1.6571	1.3757	-2.1293	1.3787	-2.3914	2.249	4.1176	1.7853	-5.0111	0.12813	0.72936	2.1317	3.7864	2.1317	-0.26211	2.1534	-6.509	0.51501	4.7779	2.1534	-3.3815	0.98648	-4.373	1.1674	1.6229	1.3356	0.63145	1.0852	4.5158	-1.4912	0.99147	-5.2501	3.9448	1	3	1.2419	11075	887	9.0482	7.7219	0.17175	122.8
-6.5023	0.40547	-1.4979	0.84378	2.6197	1.7124	-3.1208	1.3482	2.6295	0.85774	-7.3008	0.5305	-2.3914	1.339	4.1176	1.0229	-5.0111	0.69305	0.72936	1.1988	9.9303	1.1988	4.9094	1.5864	-6.509	0.40066	5.7503	1.5864	-3.3815	1.2856	0.79851	0.029576	1.6229	2.3895	5.8029	1.1517	10.66	-1.4912	-4.18	-10.422	3.9448	2	5	0.94969	93513	888	1.3377	1.3185	0.014546	2.684
-6.5023	0.39102	-1.4979	0.7799	2.6197	1.5916	-3.1208	1.6594	2.6295	0.80462	-5.577	1.16	-2.3914	1.3009	4.1176	1.0037	-5.0111	0.53572	0.72936	1.5914	8.2065	1.5914	3.1856	1.5876	-6.509	0.39235	5.7503	1.5876	-3.3815	2.3948	-0.92532	0.061772	1.6229	2.0781	4.0791	1.1601	8.9358	-1.4912	-2.4562	-8.6977	3.9448	1	4	1.0644	31296	889	3.0593	2.9245	0.046096	14.039
-6.5023	0.38486	-1.4979	0.70631	2.6197	1.4277	-3.1208	0.62226	2.6295	0.86194	-3.8531	0.56388	-2.3914	1.286	4.1176	0.91437	-5.0111	0.35789	0.72936	0.91976	6.4826	0.91976	1.4617	0.92302	-6.509	0.38563	5.7503	0.92302	-3.3815	0.52795	-2.6491	0.29117	1.6229	0.81698	2.3553	0.43969	7.212	-1.4912	-0.73237	-6.9739	3.9448	4	9	0.76116	13209	890	6.1677	5.4435	0.13304	57.061
-6.5023	0.40547	-1.4979	0.6276	2.6197	1.954	-3.1208	1.452	2.6295	0.80042	-2.1293	1.066	-2.3914	1.9252	4.1176	1.4165	-5.0111	0.093151	0.72936	1.38	4.7588	1.38	-0.26211	1.8702	-6.509	0.40546	5.7503	1.8702	-3.3815	0.88277	-4.373	1.011	1.6229	0.87421	0.63145	0.99779	5.4882	-1.4912	0.99147	-5.2501	3.9448	2	4	1.0509	6594	891	9.0467	7.7212	0.17166	122.76
-6.5023	0.65901	-1.4979	1.7982	2.6197	3.3601	-3.1208	1.1408	2.6295	0.80042	-0.40546	4.3875	-2.3914	5.7487	4.1176	6.4154	-5.0111	0.49693	0.72936	5.49	3.0349	5.49	-1.9859	1.3885	-6.509	0.66098	5.7503	1.3885	-3.3815	1.8291	-6.0968	5.0784	1.6229	2.9234	-1.0924	6.4362	3.7643	-1.4912	2.7153	-3.5262	3.9448	1	3	2.0243	14042	892	9.9042	8.4421	0.17319	147.14
-6.5023	0.27439	-1.4979	0.68128	2.6197	1.8332	-3.1208	1.6594	3.6019	0.5117	-5.577	1.066	-2.3914	1.4416	4.1176	1.2475	-5.0111	0.50681	0.72936	2.0909	9.1788	2.0909	3.1856	1.4835	-6.509	0.27518	6.7226	1.4835	-3.3815	2.3948	-0.92532	0.061772	1.6229	2.0306	4.0791	1.1121	9.9082	-1.4912	-2.4562	-8.6977	3.9448	3	6	1.0043	18115	893	3.0593	2.9245	0.04608	14.039
-6.5023	0.27444	-1.4979	0.50209	2.6197	1.5916	-3.1208	0.51857	3.6019	0.56902	-3.8531	0.4699	-2.3914	1.3327	4.1176	1.0178	-5.0111	0.28738	0.72936	1.2729	7.455	1.2729	1.4617	0.79565	-6.509	0.27537	6.7226	0.79566	-3.3815	0.50874	-2.6491	0.29119	1.6229	0.68631	2.3553	0.34477	8.1844	-1.4912	-0.73237	-6.9739	3.9448	5	11	0.65428	7267	894	6.1676	5.4435	0.13302	57.058
-6.5023	0.37899	-1.4979	0.38214	2.6197	1.7124	-3.1208	0.82968	3.6019	0.40546	-2.1293	0.78404	-2.3914	1.7539	4.1176	1.3957	-5.0111	0.073664	0.72936	0.96943	5.7312	0.96944	-0.26211	1.8271	-6.509	0.37886	6.7226	1.8271	-3.3815	0.50917	-4.373	0.82965	1.6229	0.42561	0.63145	0.88737	6.4605	-1.4912	0.99147	-5.2501	3.9448	3	7	0.74879	3339	895	9.0461	7.721	0.17161	122.75
-6.5023	0.51021	-1.4979	1.1907	2.6197	2.5578	-3.1208	1.5557	3.6019	0.68367	-0.40546	2.9778	-2.3914	2.623	4.1176	2.5197	-5.0111	0.12964	0.72936	2.8194	4.0073	2.8194	-1.9859	1.4068	-6.509	0.51085	6.7226	1.4068	-3.3815	1.8898	-6.0968	2.7212	1.6229	2.6825	-1.0924	2.7515	4.7367	-1.4912	2.7153	-3.5262	3.9448	2	4	1.5793	8258	896	9.9013	8.4408	0.17303	147.05
-6.5023	0.39624	3.5066	2.6546	4.8928	2.01	-1.1974	1.1974	3.6019	0.40546	-5.577	0.90756	-5.116	2.6869	1.3863	2.5103	-10.009	3.3946	-3.9186	1.4738	9.1788	1.4738	0.46093	1.5263	-6.5023	0.39509	4.7993	1.5263	-5.3049	1.0944	-0.92532	0.22858	4.704	2.2104	9.0835	2.7306	5.2602	3.5066	-4.3795	-6.7744	1.6022	2	4	1.2619	70988	1348	3.5324	3.5036	0.0082135	18.716
-6.5023	1.2993	-1.4979	2.3343	2.6197	2.4371	-1.1974	1.0937	-0.28768	2.4607	-5.577	0.82092	-2.3914	3.2957	4.1176	4.2937	-5.0111	1.1661	-1.194	3.0842	5.2893	3.0842	3.1856	3.7644	-6.509	1.2976	0.90975	3.7644	-5.3049	1.9968	-0.92532	1.2539	-0.30042	3.261	4.0791	2.2212	4.0953	-1.4912	-4.3795	-6.7744	3.2913	0	0	1.741	187000	898	3.1679	3.0873	0.026115	15.053
-6.5023	1.2078	-1.4979	2.1876	0.34656	2.7778	-3.1208	1.3482	0.68471	1.7749	-7.3008	0.64744	-4.6646	1.5301	1.8444	1.7776	-5.0111	1.202	-1.5438	1.5017	7.9855	1.5017	2.6362	1.5128	-6.509	1.211	3.8055	1.5128	-3.3815	1.4835	0.79851	0.22852	1.6229	2.0469	5.8029	1.6622	6.4417	-1.4912	-4.18	-10.422	1.8274	1	2	1.6573	384000	816	1.4314	1.4097	0.01533	3.0732
-6.5023	0.79861	-1.4979	2.1045	2.6197	2.1524	-1.1974	1.4048	0.68471	1.9469	-5.577	0.92221	-2.3914	2.8159	4.1176	3.242	-5.0111	1.0776	-1.194	2.9371	6.2617	2.9371	3.1856	3.5757	-6.509	0.80386	1.8821	3.5757	-5.3049	1.9369	-0.92532	1.066	-0.30042	3.6267	4.0791	2.3146	5.0677	-1.4912	-4.3795	-6.7744	3.2913	0	0	1.5549	149000	900	3.1614	3.0868	0.024148	14.991
-6.5023	0.98257	-1.4979	2.0304	2.6197	2.8322	-1.1974	1.5804	0.68471	1.6926	-3.8531	1.309	-2.3914	4.4836	4.1176	5.1488	-5.0111	0.80695	-1.194	3.3842	4.5379	3.3842	1.4617	3.8544	-6.509	0.98214	1.8821	3.8544	-5.3049	2.5466	-2.6491	1.9116	-0.30042	3.3395	2.3553	2.7541	3.3439	-1.4912	-2.6557	-5.0506	3.2913	0	0	1.7379	282000	901	7.1358	6.5379	0.091456	76.38
-6.5023	0.73462	-1.4979	1.7271	2.6197	1.6403	-1.1974	1.5804	1.6571	1.2888	-7.3008	0.52674	-2.3914	1.4814	4.1176	1.4653	-5.0111	0.97828	-1.194	1.3636	8.9579	1.3636	4.9094	2.1059	-6.509	0.7379	2.8545	2.1059	-5.3049	2.2811	0.79851	0.10223	-0.30042	3.2204	5.8029	1.518	7.7639	-1.4912	-6.1034	-8.4982	3.2913	2	4	1.2497	1900000	902	1.3461	1.3328	0.0099763	2.7182
-6.5023	0.40547	-1.4979	1.7549	2.6197	1.9108	-1.1974	1.8196	1.6571	1.4331	-5.577	1.1895	-2.3914	1.868	4.1176	1.7897	-5.0111	0.9773	-1.194	2.5581	7.2341	2.5581	3.1856	3.0234	-6.509	0.41384	2.8545	3.0234	-5.3049	1.8675	-0.92532	0.69509	-0.30042	3.8887	4.0791	2.1936	6.0401	-1.4912	-4.3795	-6.7744	3.2913	1	3	1.4189	106000	903	3.1589	3.0867	0.023398	14.968
-6.5023	0.64481	-1.4979	1.7332	2.6197	2.4371	-1.1974	2.0271	1.6571	1.3184	-3.8531	1.7651	-2.3914	3.8642	4.1176	3.8261	-5.0111	0.62729	-1.194	3.2487	5.5102	3.2487	1.4617	3.5774	-6.509	0.64611	2.8545	3.5775	-5.3049	2.5661	-2.6491	1.8935	-0.30042	3.2431	2.3553	2.6461	4.3162	-1.4912	-2.6557	-5.0506	3.2913	1	3	1.6543	27261	904	7.1297	6.5363	0.090777	76.248
-6.5023	0.51193	-1.4979	1.3018	2.6197	1.5916	-1.1974	1.7159	2.6295	0.91927	-7.3008	0.53433	-2.3914	1.2526	4.1176	1.0582	-5.0111	0.83526	-1.194	1.3121	9.9303	1.3121	4.9094	1.6226	-6.509	0.50958	3.8269	1.6226	-5.3049	2.2645	0.79851	0.040355	-0.30042	3.2333	5.8029	1.3836	8.7363	-1.4912	-6.1034	-8.4982	3.2913	2	4	1.0958	176000	905	1.3458	1.3328	0.009693	2.7166
-6.5023	0.38216	-1.4979	1.2978	2.6197	1.7124	-1.1974	1.7159	2.6295	0.91927	-5.577	1.0127	-2.3914	1.271	4.1176	1.0517	-5.0111	0.78572	-1.194	1.7749	8.2065	1.7749	3.1856	2.0061	-6.509	0.38407	3.8269	2.0061	-5.3049	1.7135	-0.92532	0.091105	-0.30042	3.7265	4.0791	1.6991	7.0125	-1.4912	-4.3795	-6.7744	3.2913	1	3	1.1734	59632	906	3.1579	3.0866	0.023117	14.959
-6.5023	0.40547	-1.4979	1.3113	2.6197	2.1955	-1.1974	2.3382	2.6295	0.80462	-3.8531	2.3448	-2.3914	2.024	4.1176	1.6929	-5.0111	0.46849	-1.194	3.0852	6.4826	3.0852	1.4617	2.1466	-6.509	0.40537	3.8269	2.1466	-5.3049	2.5933	-2.6491	1.9385	-0.30042	2.9326	2.3553	2.1571	5.2886	-1.4912	-2.6557	-5.0506	3.2913	1	3	1.5666	17059	907	7.1274	6.5357	0.090518	76.199
-6.5023	0.52777	-1.4979	2.3691	2.6197	4.2055	-1.1974	2.9605	2.6295	0.80042	-2.1293	2.7364	-2.3914	6.65	4.1176	7.5959	-5.0111	0.9089	-1.194	3.7417	4.7588	3.7417	-0.26211	3.9125	-6.509	0.53323	3.8269	3.9125	-5.3049	3.84	-4.373	3.6524	-0.30042	5.8338	0.63145	5.6711	3.5648	-1.4912	-0.93188	-3.3267	3.2913	1	2	2.2666	7293	908	13.605	10.373	0.31159	277.63
-6.5023	0.40547	-1.4979	1.0376	2.6197	1.6693	-1.1974	1.9234	3.6019	0.91296	-7.3008	0.53324	-2.3914	1.2257	4.1176	0.97304	-5.0111	0.75465	-1.194	1.8758	10.903	1.8758	4.9094	1.4962	-6.509	0.40061	4.7993	1.4961	-5.3049	2.391	0.79851	0.035041	-0.30042	3.3862	5.8029	1.3411	9.7087	-1.4912	-6.1034	-8.4982	3.2913	2	4	1.0803	122000	909	1.3456	1.3328	0.0095742	2.716
-6.5023	0.27385	-1.4979	0.95943	2.6197	1.7124	-1.1974	1.7159	3.6019	0.68367	-5.577	0.78405	-2.3914	1.1152	4.1176	0.89068	-5.0111	0.6086	-1.194	2.1344	9.1788	2.1344	3.1856	1.6492	-6.509	0.27354	4.7993	1.6492	-5.3049	1.68	-0.92532	0.046466	-0.30042	3.5939	4.0791	1.4521	7.9849	-1.4912	-4.3795	-6.7744	3.2913	2	5	1.0216	34388	910	3.1576	3.0866	0.023008	14.956
-6.5023	0.39406	-1.4979	0.80643	2.6197	1.954	-1.1974	2.0271	3.6019	0.45438	-3.8531	1.5165	-2.3914	1.6079	4.1176	1.2676	-5.0111	0.31933	-1.194	2.8036	7.455	2.8036	1.4617	1.4406	-6.509	0.39729	4.7993	1.4406	-5.3049	2.4807	-2.6491	1.2899	-0.30042	2.7425	2.3553	1.2119	6.261	-1.4912	-2.6557	-5.0506	3.2913	2	4	1.1921	9367	911	7.1265	6.5355	0.090424	76.18
-6.5023	0.40547	-1.4979	2.5196	2.6197	4.3263	-1.1974	3.7902	3.6019	0.56902	-2.1293	3.6034	-2.3914	7.5234	4.1176	8.1321	-5.0111	1.2124	-1.194	3.7662	5.7312	3.7662	-0.26211	3.9143	-6.509	0.40533	4.7993	3.9143	-5.3049	4.3482	-4.373	4.1999	-0.30042	6.8693	0.63145	6.7281	4.5372	-1.4912	-0.93188	-3.3267	3.2913	2	3	2.5357	4401	912	13.602	10.371	0.31157	277.53
-6.5023	3.001	-1.4979	2.9207	2.6197	2.9978	0.72595	1.1502	-0.28768	2.1741	-7.3008	1.0042	-2.3914	2.5224	4.1176	5.3629	-5.0111	1.6641	-3.1174	1.1012	7.0131	1.1012	4.9094	3.9141	-6.509	2.9285	-1.0136	3.9141	-7.2282	4.5348	0.79851	1.5769	-2.2238	4.1848	5.8029	1.7701	3.8958	-1.4912	-8.0268	-6.5748	1.939	0	0	2.208	629000	913	1.376	1.3346	0.031012	2.8401
-6.5023	1.6956	-1.4979	2.5327	0.34656	2.657	-1.1974	0.87686	1.6571	1.2038	-7.3008	0.72228	-4.6646	1.3053	1.8444	1.9896	-5.0111	1.4067	-3.4671	0.94779	8.9579	0.94779	2.6362	1.5443	-6.509	1.6917	2.8545	1.5443	-5.3049	2.2504	0.79851	0.50641	-0.30042	2.8117	5.8029	1.7549	5.4908	-1.4912	-6.1034	-8.4982	1.2989	1	2	1.6147	436000	830	1.4434	1.4267	0.011668	3.125
-6.5023	1.1604	-1.4979	2.2311	0.34656	2.8986	-1.1974	1.0937	2.6295	0.91927	-7.3008	0.61981	-4.6646	1.5362	1.8444	1.7163	-5.0111	1.235	-3.4671	1.0735	9.9303	1.0735	2.6362	1.4483	-6.509	1.1422	3.8269	1.4483	-5.3049	2.1617	0.79851	0.16953	-0.30042	3.0367	5.8029	1.6946	6.4631	-1.4912	-6.1034	-8.4982	1.2989	1	2	1.4871	329000	832	1.4398	1.4267	0.0092304	3.1096
-6.5023	1.2969	-1.4979	2.3422	2.6197	2.4371	0.72595	2.6022	1.6571	0.97449	-5.577	0.81858	-2.3914	3.3376	4.1176	4.3199	-5.0111	1.1642	-3.1174	1.4239	7.2341	1.4239	3.1856	3.7785	-6.509	1.2953	0.93113	3.7785	-7.2282	3.8932	-0.92532	1.2658	-2.2238	5.1929	4.0791	2.2345	4.1167	-1.4912	-6.3029	-4.851	1.939	0	0	1.7452	185000	916	3.1759	3.0957	0.025895	15.129
-6.5023	1.6931	-1.4979	2.534	0.34656	2.657	0.72595	2.0836	3.6019	1.1996	-7.3008	0.71514	-4.6646	1.3258	1.8444	1.9913	-5.0111	1.3923	-5.3905	2.0966	10.903	2.0966	2.6362	1.545	-6.509	1.6888	2.8759	1.5451	-7.2282	4.1439	0.79851	0.50293	-2.2238	4.7315	5.8029	1.7679	5.5122	-1.4912	-8.0268	-6.5748	0.47807	1	2	1.8137	434000	839	1.444	1.4278	0.011392	3.1278
-6.5023	0.793	-1.4979	2.0773	2.6197	2.0747	0.72595	3.1208	2.6295	0.7473	-5.577	0.97201	-2.3914	2.7287	4.1176	3.1458	-5.0111	1.0599	-3.1174	1.4805	8.2065	1.4805	3.1856	3.546	-6.509	0.79677	1.9035	3.546	-7.2282	3.8096	-0.92532	1.0252	-2.2238	5.518	4.0791	2.2759	5.0891	-1.4912	-6.3029	-4.851	1.939	1	1	1.6309	146000	918	3.1695	3.0953	0.023974	15.069
-6.5023	1.0288	-1.4979	2.0156	2.6197	3.1186	0.72595	3.4319	2.6295	0.85774	-3.8531	1.329	-2.3914	4.6237	4.1176	5.446	-5.0111	0.77	-3.1174	1.7577	6.4826	1.7577	1.4617	3.939	-6.509	1.0027	1.9035	3.939	-7.2282	4.5034	-2.6491	2.0776	-2.2238	5.321	2.3553	2.9436	3.3653	-1.4912	-4.5791	-3.1272	1.939	0	0	1.9636	33297	919	7.2358	6.6257	0.092075	78.535
-6.5023	0.67051	-1.4979	1.6788	2.6197	1.5916	0.72595	3.2245	3.6019	1.1423	-7.3008	0.52895	-2.3914	1.4553	4.1176	1.4208	-5.0111	0.97345	-3.1174	2.0013	10.903	2.0013	4.9094	2.063	-6.509	0.67656	2.8759	2.063	-7.2282	4.1471	0.79851	0.093433	-2.2238	5.098	5.8029	1.511	7.7853	-1.4912	-8.0268	-6.5748	1.939	2	4	1.4728	248000	920	1.3468	1.3335	0.0099286	2.7206
-6.5023	0.40547	-1.4979	1.7209	2.6197	1.8332	0.72595	3.6393	3.6019	0.62635	-5.577	1.16	-2.3914	1.8391	4.1176	1.7456	-5.0111	0.96113	-3.1174	1.6879	9.1788	1.6879	3.1856	2.9884	-6.509	0.40504	2.8759	2.9884	-7.2282	3.7524	-0.92532	0.66231	-2.2238	5.8141	4.0791	2.1695	6.0615	-1.4912	-6.3029	-4.851	1.939	2	4	1.5642	103000	921	3.1671	3.0951	0.023247	15.046
-6.5023	0.57473	-1.4979	1.6676	2.6197	2.5147	0.72595	3.9504	3.6019	0.85564	-3.8531	1.8013	-2.3914	4.5369	4.1176	4.4591	-5.0111	0.56315	-3.1174	1.8058	7.455	1.8058	1.4617	3.78	-6.509	0.58132	2.8759	3.78	-7.2282	4.4871	-2.6491	2.0209	-2.2238	5.0781	2.3553	2.7744	4.3376	-1.4912	-4.5791	-3.1272	1.939	1	3	1.8941	24102	922	7.2299	6.6242	0.091425	78.406
-6.5023	0.38211	-1.4979	0.88815	4.8928	0.80227	-6.9675	2.6022	-0.28768	2.9766	-3.8531	2.3673	-0.11827	1.3372	6.3907	1.7074	-5.0111	0.76083	6.8492	4.2182	3.5655	4.2182	3.7349	1.7965	-6.509	0.38007	6.6798	1.7966	0.46522	2.4988	-2.6491	3.109	5.4697	1.605	2.3553	2.5863	10.415	-1.4912	3.1144	-10.821	6.3749	1	2	1.6698	105000	923	1.5468	1.5041	0.028342	3.5887
-6.5023	0.4	-1.4979	1.2166	4.8928	0.92305	-6.9675	3.743	-0.28768	2.8619	-2.1293	4.0815	-0.11827	2.0966	6.3907	2.5003	-5.0111	0.79921	6.8492	6.4605	1.8416	6.4606	2.011	1.8837	-6.509	0.39892	6.6798	1.8837	0.46522	3.3517	-4.373	4.8382	5.4697	2.1996	0.63145	4.7043	8.6909	-1.4912	4.8382	-9.0968	6.3749	1	2	2.2043	154000	924	1.5738	1.5535	0.013107	3.7154
-6.5023	0.77118	-1.4979	1.9172	4.8928	2.01	-6.9675	4.469	-0.28768	2.8619	-0.40546	6.1731	-0.11827	3.5056	6.3907	4.0615	-5.0111	1.0904	6.8492	8.737	0.11778	8.737	0.28719	1.839	-6.509	0.77115	6.6798	1.839	0.46522	3.6015	-6.0968	6.648	5.4697	2.5316	-1.0924	7.519	6.967	-1.4912	6.562	-7.373	6.3749	0	0	3.0337	278000	925	1.5786	1.5592	0.012447	3.738
-6.5023	0.27445	-1.4979	0.80084	4.8928	0.56073	-6.9675	2.1873	0.68471	2.2335	-3.8531	2.3515	-0.11827	1.0938	6.3907	1.2804	-5.0111	0.72999	6.8492	3.2133	4.5379	3.2133	3.7349	1.7874	-6.509	0.2816	7.6522	1.7874	0.46522	2.3415	-2.6491	3.0824	5.4697	1.4965	2.3553	2.4561	11.387	-1.4912	3.1144	-10.821	6.3749	2	4	1.4014	66544	926	1.5467	1.5041	0.028327	3.5886
-6.5023	0.3849	-1.4979	0.9435	4.8928	0.6815	-6.9675	3.3282	0.68471	2.0615	-2.1293	3.9793	-0.11827	1.5819	6.3907	1.9665	-5.0111	0.69114	6.8492	5.308	2.814	5.308	2.011	2.0171	-6.509	0.38476	7.6522	2.0171	0.46522	3.1151	-4.373	4.8228	5.4697	1.9747	0.63145	4.3932	9.6632	-1.4912	4.8382	-9.0968	6.3749	2	4	1.8965	104000	927	1.5737	1.5535	0.013034	3.7148
-6.5023	0.40547	-1.4979	1.487	4.8928	1.2854	-6.9675	4.0541	0.68471	1.8895	-0.40546	5.9872	-0.11827	2.5974	6.3907	3.0294	-5.0111	0.89179	6.8492	7.4593	1.0902	7.4593	0.28719	2.3059	-6.509	0.40665	7.6522	2.306	0.46522	3.5124	-6.0968	6.5813	5.4697	2.3543	-1.0924	6.8671	7.9394	-1.4912	6.562	-7.373	6.3749	1	2	2.5181	197000	928	1.5779	1.5592	0.011992	3.7345
-6.5023	0.37909	-1.4979	0.78208	4.8928	0.56073	-6.9675	2.8096	1.6571	1.3184	-2.1293	3.8016	-0.11827	1.1975	6.3907	1.4408	-5.0111	0.603	6.8492	4.2225	3.7864	4.2225	2.011	1.9633	-6.509	0.37741	8.6246	1.9633	0.46522	2.9039	-4.373	4.8017	5.4697	1.7459	0.63145	4.1714	10.636	-1.4912	4.8382	-9.0968	6.3749	2	4	1.6086	63101	929	1.5737	1.5535	0.012987	3.7146
-6.5023	0.3934	-1.4979	1.136	4.8928	0.92305	-6.9675	3.6393	1.6571	1.2611	-0.40546	5.8005	-0.11827	1.8995	6.3907	2.3537	-5.0111	0.74626	6.8492	6.1644	2.0625	6.1644	0.28719	2.6237	-6.509	0.39692	8.6246	2.6237	0.46522	3.3392	-6.0968	6.5565	5.4697	2.1434	-1.0924	6.3841	8.9118	-1.4912	6.562	-7.373	6.3749	1	3	2.1922	136000	930	1.5776	1.5592	0.011816	3.7331
-6.5023	0.31813	-1.4979	0.92097	4.8928	0.6328	-6.9675	3.3666	2.6295	0.80924	-0.40546	5.7581	-0.11827	1.5181	6.3907	1.8384	-5.0111	0.6837	6.8492	5.3128	3.0349	5.3128	0.28719	3.1313	-6.509	0.31401	9.597	3.1313	0.46522	3.1963	-6.0968	6.5416	5.4697	2.045	-1.0924	6.1407	9.8842	-1.4912	6.562	-7.373	6.3749	2	4	1.9676	676000	931	1.5775	1.5591	0.01175	3.7326
-6.5023	0.317	-1.4979	0.7538	4.8928	0.47307	-6.9675	3.0237	3.6019	0.54221	-0.40546	5.7471	-0.11827	1.168	6.3907	1.384	-5.0111	0.6149	6.8492	4.3439	4.0073	4.3439	0.28719	3.5063	-6.509	0.31084	10.569	3.5063	0.46522	3.0137	-6.0968	6.5254	5.4697	1.8754	-1.0924	5.9359	10.857	-1.4912	6.562	-7.373	6.3749	3	5	1.8095	394000	932	1.5774	1.5591	0.011728	3.7324
-6.5023	0.40547	-1.4979	1.021	4.8928	1.0321	-5.0441	0.54566	-0.28768	2.9304	-5.577	0.66734	-0.11827	1.7758	6.3907	2.2619	-5.0111	0.85294	4.9259	2.0118	5.2893	2.0118	5.4587	2.5772	-6.509	0.39893	4.7565	2.5772	-1.4581	0.41453	-0.92532	0.26489	3.5463	0.90874	4.0791	0.92515	10.215	-1.4912	-0.53283	-10.621	6.3508	3	6	1.1003	345000	933	2.5148	2.2359	0.12473	9.4863
-6.5023	0.38254	-1.4979	1.0111	4.8928	0.8724	-5.0441	0.96318	-0.28768	2.9304	-3.8531	0.80791	-0.11827	1.7003	6.3907	2.1783	-5.0111	0.81596	4.9259	2.8633	3.5655	2.8633	3.7349	1.7687	-6.509	0.3848	4.7565	1.7686	-1.4581	0.83792	-2.6491	1.1301	3.5463	0.89812	2.3553	1.2841	8.4913	-1.4912	1.191	-8.8973	6.3508	1	2	1.1613	216000	934	3.6178	3.2909	0.099346	19.633
-6.5023	0.40547	-1.4979	1.1507	4.8928	1.1646	-5.0441	1.9234	-0.28768	3.1486	-2.1293	2.3336	-0.11827	2.1938	6.3907	2.5834	-5.0111	0.51164	4.9259	4.8123	1.8416	4.8123	2.011	1.7166	-6.509	0.39894	4.7565	1.7166	-1.4581	2.1002	-4.373	2.9193	3.5463	1.5739	0.63145	3.0046	6.7675	-1.4912	2.9148	-7.1734	6.3508	1	3	1.6877	40688	935	4.0094	3.8472	0.042159	24.113
-6.5023	0.65301	-1.4979	1.8738	4.8928	2.8554	-5.0441	2.3382	-0.28768	2.9766	-0.40546	4.7778	-0.11827	4.4566	6.3907	4.8553	-5.0111	0.89209	4.9259	7.7142	0.11778	7.7142	0.28719	1.6182	-6.509	0.65513	4.7565	1.6182	-1.4581	2.1592	-6.0968	4.8015	3.5463	1.868	-1.0924	5.9385	5.0436	-1.4912	4.6387	-5.4496	6.3508	1	2	2.5791	85389	936	4.0763	3.9354	0.035806	24.925
-6.5023	0.38215	-1.4979	0.81946	4.8928	0.80227	-5.0441	0.47139	0.68471	2.1762	-5.577	0.50212	-0.11827	1.3615	6.3907	1.6751	-5.0111	0.77701	4.9259	1.4954	6.2617	1.4954	5.4587	1.9612	-6.509	0.37893	5.7289	1.9612	-1.4581	0.39915	-0.92532	0.25013	3.5463	0.75236	4.0791	0.86734	11.188	-1.4912	-0.53283	-10.621	6.3508	3	6	0.85893	29492	937	2.5148	2.2359	0.12471	9.4861
-6.5023	0.3791	-1.4979	0.81697	4.8928	0.6815	-5.0441	0.88624	0.68471	2.2335	-3.8531	0.75184	-0.11827	1.264	6.3907	1.5909	-5.0111	0.74109	4.9259	2.3342	4.5379	2.3342	3.7349	1.3555	-6.509	0.37599	5.7289	1.3555	-1.4581	0.74616	-2.6491	1.1001	3.5463	0.86551	2.3553	1.1489	9.4637	-1.4912	1.191	-8.8973	6.3508	2	5	0.95819	18196	938	3.6178	3.2909	0.099337	19.632
-6.5023	0.378	-1.4979	0.76719	4.8928	0.6815	-5.0441	2.0271	0.68471	2.2335	-2.1293	2.0997	-0.11827	1.4548	6.3907	1.7788	-5.0111	0.38931	4.9259	3.59	2.814	3.59	2.011	1.4394	-6.509	0.37806	5.7289	1.4394	-1.4581	2.1214	-4.373	2.8807	3.5463	1.3399	0.63145	2.7817	7.7399	-1.4912	2.9148	-7.1734	6.3508	2	4	1.3645	22891	939	4.0091	3.8472	0.042072	24.109
-6.5023	0.40547	-1.4979	1.4866	4.8928	1.7685	-5.0441	1.8196	0.68471	2.3481	-0.40546	4.4814	-0.11827	2.9852	6.3907	3.3378	-5.0111	0.72195	4.9259	6.1604	1.0902	6.1604	0.28719	1.6474	-6.509	0.40257	5.7289	1.6475	-1.4581	2.1975	-6.0968	4.6513	3.5463	1.8198	-1.0924	5.1817	6.016	-1.4912	4.6387	-5.4496	6.3508	1	3	2.0516	57304	940	4.0744	3.9352	0.035358	24.901
-6.5023	0.27395	-1.4979	0.67483	4.8928	0.43995	-5.0441	0.67881	1.6571	1.4331	-3.8531	0.75184	-0.11827	0.94036	6.3907	1.0487	-5.0111	0.66036	4.9259	1.7329	5.5102	1.733	3.7349	0.97262	-6.509	0.27603	6.7012	0.97263	-1.4581	0.74213	-2.6491	1.0982	3.5463	0.82134	2.3553	1.0181	10.436	-1.4912	1.191	-8.8973	6.3508	4	7	0.70875	10224	941	3.6177	3.2909	0.09933	19.632
-6.5023	0.27233	-1.4979	0.6076	4.8928	0.43995	-5.0441	1.9234	1.6571	1.4904	-2.1293	2.2877	-0.11827	1.092	6.3907	1.2647	-5.0111	0.36322	4.9259	3.1269	3.7864	3.1269	2.011	1.3958	-6.509	0.26794	6.7012	1.3958	-1.4581	2.1061	-4.373	2.8651	3.5463	1.3147	0.63145	2.7381	8.7123	-1.4912	2.9148	-7.1734	6.3508	3	5	1.1702	12904	942	4.0089	3.8472	0.042039	24.107
-6.5023	0.37704	-1.4979	0.92927	4.8928	0.80227	-5.0441	2.3382	1.6571	1.2611	-0.40546	3.9176	-0.11827	1.7131	6.3907	2.0836	-5.0111	0.46601	4.9259	4.4861	2.0625	4.4861	0.28719	1.6371	-6.509	0.37829	6.7012	1.6371	-1.4581	2.3207	-6.0968	4.6061	3.5463	1.5419	-1.0924	4.6678	6.9884	-1.4912	4.6387	-5.4496	6.3508	1	3	1.6042	30277	943	4.0736	3.9351	0.035192	24.891
-6.5023	0.27252	-1.4979	0.54503	4.8928	0.40547	-5.0441	0.5751	2.6295	0.7473	-3.8531	0.84582	-0.11827	0.68086	6.3907	0.63742	-5.0111	0.55535	4.9259	1.1746	6.4826	1.1746	3.7349	0.74542	-6.509	0.26893	7.6736	0.74543	-1.4581	0.18936	-2.6491	1.0658	3.5463	0.76879	2.3553	0.87207	11.408	-1.4912	1.191	-8.8973	6.3508	5	12	0.56521	4986	944	3.6177	3.2908	0.099329	19.632
-6.5023	0.27175	-1.4979	0.48523	4.8928	0.40547	-5.0441	1.8196	2.6295	0.80042	-2.1293	2.3817	-0.11827	0.77368	6.3907	0.83476	-5.0111	0.34003	4.9259	2.6363	4.7588	2.6362	2.011	1.3288	-6.509	0.26654	7.6736	1.3288	-1.4581	2.0916	-4.373	2.8587	3.5463	1.2809	0.63145	2.6773	9.6847	-1.4912	2.9148	-7.1734	6.3508	3	5	1.0274	6140	945	4.0089	3.8472	0.042034	24.107
-6.5023	0.27279	-1.4979	0.66445	4.8928	0.43995	-5.0441	2.1308	2.6295	0.7473	-0.40546	3.8236	-0.11827	1.3092	6.3907	1.5354	-5.0111	0.39604	4.9259	3.6164	3.0349	3.6164	0.28719	1.6923	-6.509	0.26944	7.6736	1.6923	-1.4581	2.2656	-6.0968	4.5826	3.5463	1.3694	-1.0924	4.57	7.9608	-1.4912	4.6387	-5.4496	6.3508	4	6	1.3465	18076	946	4.0733	3.9351	0.035125	24.888
-6.5023	0.27266	-1.4979	0.36823	4.8928	0.28469	-5.0441	1.8196	3.6019	0.29082	-2.1293	2.7576	-0.11827	0.49184	6.3907	0.46387	-5.0111	0.30969	4.9259	2.2985	5.7312	2.2985	2.011	1.7008	-6.509	0.26965	8.646	1.7008	-1.4581	2.0906	-4.373	2.847	3.5463	1.2363	0.63145	2.5938	10.657	-1.4912	2.9148	-7.1734	6.3508	4	8	0.96561	2155	947	4.0089	3.8472	0.042026	24.106
-6.5023	0.27265	-1.4979	0.51604	4.8928	0.40547	-5.0441	1.7159	3.6019	0.39706	-0.40546	3.6356	-0.11827	0.99686	6.3907	1.0727	-5.0111	0.38027	4.9259	2.7218	4.0073	2.7218	0.28719	2.0013	-6.509	0.269	8.646	2.0013	-1.4581	2.1214	-6.0968	4.5459	3.5463	1.2134	-1.0924	4.4441	8.9332	-1.4912	4.6387	-5.4496	6.3508	4	6	1.1571	9321	948	4.0732	3.9351	0.035101	24.887
-6.5023	0.40547	-1.4979	1.0424	4.8928	0.80227	-3.1208	1.3483	-0.28768	2.9766	-7.3008	0.61888	-0.11827	1.444	6.3907	2.0105	-5.0111	0.75737	3.0025	2.5546	7.0131	2.5546	7.1825	3.0313	-6.509	0.40159	2.8331	3.0313	-3.3815	1.3102	0.79851	0.037453	1.6229	2.4104	5.8029	1.2327	10.016	-1.4912	-4.18	-10.422	6.2004	2	4	1.199	124000	949	1.3279	1.3087	0.014666	2.6451
-6.5023	0.40487	-1.4979	0.83218	4.8928	0.92305	-3.1208	1.5557	-0.28768	2.9193	-5.577	1.16	-0.11827	1.4899	6.3907	1.9246	-5.0111	0.58741	3.0025	1.7826	5.2893	1.7826	5.4587	3.4216	-6.509	0.39892	2.8331	3.4216	-3.3815	2.2351	-0.92532	0.092085	1.6229	2.1294	4.0791	1.2246	8.2918	-1.4912	-2.4562	-8.6977	6.2004	1	4	1.2992	42277	950	3.037	2.904	0.045794	13.835
-6.5023	0.40547	-1.4979	0.998	4.8928	1.1646	-3.1208	0.62226	-0.28768	3.1486	-3.8531	0.67273	-0.11827	2.0552	6.3907	2.5445	-5.0111	0.42993	3.0025	2.2014	3.5655	2.2014	3.7349	2.9902	-6.509	0.39892	2.8331	2.9902	-3.3815	0.56325	-2.6491	0.30117	1.6229	1.0112	2.3553	0.64451	6.568	-1.4912	-0.73237	-6.9739	6.2004	3	8	1.1686	20067	951	6.1222	5.4132	0.13099	56.223
-6.5023	0.40547	-1.4979	0.82338	4.8928	2.6139	-3.1208	1.3482	-0.28768	3.1486	-2.1293	1.3479	-0.11827	2.5558	6.3907	2.8214	-5.0111	0.11237	3.0025	3.7855	1.8416	3.7855	2.011	2.5889	-6.509	0.40715	2.8331	2.5889	-3.3815	1.1526	-4.373	1.1661	1.6229	1.3833	0.63145	1.0906	4.8441	-1.4912	0.99147	-5.2501	6.2004	1	3	1.6146	10005	952	8.9775	7.6921	0.1671	120.89
-6.5023	0.27498	-1.4979	0.9021	4.8928	0.56073	-3.1208	1.3482	0.68471	2.2335	-7.3008	0.5277	-0.11827	1.1543	6.3907	1.5293	-5.0111	0.70589	3.0025	2.1804	7.9855	2.1804	7.1825	2.5561	-6.509	0.27976	3.8055	2.5561	-3.3815	1.267	0.79851	0.025284	1.6229	2.3266	5.8029	1.1594	10.988	-1.4912	-4.18	-10.422	6.2004	3	6	0.97454	80341	953	1.3279	1.3087	0.014643	2.6449
-6.5023	0.38305	-1.4979	0.70471	4.8928	0.6815	-3.1208	1.6594	0.68471	2.2335	-5.577	1.16	-0.11827	1.1265	6.3907	1.4152	-5.0111	0.55265	3.0025	1.5992	6.2617	1.5992	5.4587	2.9346	-6.509	0.38334	3.8055	2.9346	-3.3815	2.4162	-0.92532	0.068395	1.6229	2.0546	4.0791	1.1949	9.2642	-1.4912	-2.4562	-8.6977	6.2004	3	6	1.137	27201	954	3.0369	2.904	0.045767	13.834
-6.5023	0.37969	-1.4979	0.63656	4.8928	0.80227	-3.1208	0.51857	0.68471	2.2335	-3.8531	0.56387	-0.11827	1.3332	6.3907	1.7224	-5.0111	0.35072	3.0025	1.445	4.5379	1.445	3.7349	2.1735	-6.509	0.3797	3.8055	2.1735	-3.3815	0.53762	-2.6491	0.2946	1.6229	0.82015	2.3553	0.43751	7.5404	-1.4912	-0.73237	-6.9739	6.2004	4	9	0.85574	11478	955	6.1219	5.4131	0.13095	56.217
-6.5023	0.40547	-1.4979	0.49002	4.8928	1.5269	-3.1208	1.2445	0.68471	2.4628	-2.1293	1.066	-0.11827	1.504	6.3907	1.7892	-5.0111	0.087209	3.0025	2.6229	2.814	2.6229	2.011	1.582	-6.509	0.40518	3.8055	1.582	-3.3815	0.86077	-4.373	1.0364	1.6229	0.83807	0.63145	1.0126	5.8165	-1.4912	0.99147	-5.2501	6.2004	2	4	1.1993	5927	956	8.9764	7.6916	0.16704	120.86
-6.5023	0.64876	-1.4979	1.7555	4.8928	5.754	-3.1208	1.3483	0.68471	2.1762	-0.40546	4.7634	-0.11827	8.3753	6.3907	9.0977	-5.0111	0.43324	3.0025	7.8115	1.0902	7.8115	0.28719	3.601	-6.509	0.65077	3.8055	3.601	-3.3815	2.0704	-6.0968	5.4831	1.6229	3.2417	-1.0924	6.9573	4.0927	-1.4912	2.7153	-3.5262	6.2004	1	3	2.741	11440	957	9.8206	8.407	0.16815	144.67
-6.5023	0.27412	-1.4979	0.61772	4.8928	0.43995	-3.1208	1.7631	1.6571	1.4904	-5.577	1.0522	-0.11827	0.86391	6.3907	0.97223	-5.0111	0.52975	3.0025	1.4648	7.2341	1.4648	5.4587	2.395	-6.509	0.27445	4.7779	2.395	-3.3815	2.3978	-0.92532	0.062725	1.6229	1.964	4.0791	1.1409	10.237	-1.4912	-2.4562	-8.6977	6.2004	3	6	0.93959	14974	958	3.0369	2.904	0.045752	13.834
-6.5023	0.27358	-1.4979	0.47018	4.8928	0.56073	-3.1208	0.51857	1.6571	1.4331	-3.8531	0.4699	-0.11827	0.88822	6.3907	1.0902	-5.0111	0.29515	3.0025	0.92184	5.5102	0.92184	3.7349	1.5421	-6.509	0.2722	4.7779	1.5421	-3.3815	0.52795	-2.6491	0.2915	1.6229	0.73782	2.3553	0.35415	8.5127	-1.4912	-0.73237	-6.9739	6.2004	5	11	0.62101	6243	959	6.1218	5.413	0.13094	56.215
-6.5023	0.27455	-1.4979	0.31771	4.8928	0.6815	-3.1208	0.62228	1.6571	1.3758	-2.1293	0.78404	-0.11827	0.6586	6.3907	0.88988	-5.0111	0.066451	3.0025	1.5386	3.7864	1.5386	2.011	0.89001	-6.509	0.27479	4.7779	0.89001	-3.3815	0.40546	-4.373	0.83018	1.6229	0.31971	0.63145	0.86486	6.7889	-1.4912	0.99147	-5.2501	6.2004	4	9	0.67597	2703	960	8.976	7.6914	0.16701	120.85
-6.5023	0.46309	-1.4979	1.2449	4.8928	3.9073	-3.1208	1.7832	1.6571	1.4405	-0.40546	3.1369	-0.11827	4.0276	6.3907	3.7922	-5.0111	0.14142	3.0025	5.2976	2.0625	5.2976	0.28719	3.3111	-6.509	0.46399	4.7779	3.3111	-3.3815	2.175	-6.0968	2.7565	1.6229	3.2012	-1.0924	2.8268	5.065	-1.4912	2.7153	-3.5262	6.2004	1	3	1.996	53950	961	9.8185	8.4061	0.16803	144.6
-6.5023	0.23177	-1.4979	0.52854	4.8928	0.3256	-3.1208	1.7832	2.6295	0.77134	-5.577	0.85301	-0.11827	0.64635	6.3907	0.64281	-5.0111	0.46812	3.0025	1.2738	8.2065	1.2738	5.4587	1.8233	-6.509	0.23539	5.7503	1.8233	-3.3815	2.3922	-0.92532	0.067679	1.6229	1.8727	4.0791	1.087	11.209	-1.4912	-2.4562	-8.6977	6.2004	3	8	0.7489	50312	962	3.0369	2.904	0.045752	13.834
-6.5023	0.23144	-1.4979	0.35303	4.8928	0.3932	-3.1208	0.54868	2.6295	0.73343	-3.8531	0.37289	-0.11827	0.57503	6.3907	0.61997	-5.0111	0.25572	3.0025	0.56064	6.4826	0.56065	3.7349	1.015	-6.509	0.23157	5.7503	1.015	-3.3815	0.52059	-2.6491	0.29296	1.6229	0.66815	2.3553	0.28304	9.4851	-1.4912	-0.73237	-6.9739	6.2004	6	16	0.43878	23016	963	6.1218	5.413	0.13094	56.215
-6.5023	0.23182	-1.4979	0.2525	4.8928	0.3932	-3.1208	0.48009	2.6295	0.73343	-2.1293	0.72947	-0.11827	0.3978	6.3907	0.50106	-5.0111	0.060034	3.0025	0.99305	4.7588	0.99306	2.011	0.62574	-6.509	0.23187	5.7503	0.62574	-3.3815	0.36781	-4.373	0.75904	1.6229	0.27299	0.63145	0.82905	7.7613	-1.4912	0.99147	-5.2501	6.2004	6	14	0.47009	9742	964	8.9758	7.6914	0.16699	120.85
-6.5023	0.40547	-1.4979	0.74898	4.8928	1.7685	-3.1208	2.2817	2.6295	0.91927	-0.40546	2.8838	-0.11827	1.7714	6.3907	1.8013	-5.0111	0.10187	3.0025	3.3445	3.0349	3.3445	0.28719	2.4161	-6.509	0.40499	5.7503	2.4161	-3.3815	2.152	-6.0968	2.7029	1.6229	2.3533	-1.0924	2.6978	6.0374	-1.4912	2.7153	-3.5262	6.2004	2	4	1.5013	3787	965	9.8177	8.4057	0.16798	144.58
-6.5023	0.27263	-1.4979	0.31554	4.8928	0.28469	-3.1208	0.62228	3.6019	0.29082	-3.8531	0.28195	-0.11827	0.38119	6.3907	0.3376	-5.0111	0.25013	3.0025	0.43743	7.455	0.43743	3.7349	0.56909	-6.509	0.27064	6.7226	0.56909	-3.3815	0.50972	-2.6491	0.31149	1.6229	0.61567	2.3553	0.28248	10.458	-1.4912	-0.73237	-6.9739	6.2004	6	18	0.34465	1150	966	6.1218	5.413	0.13094	56.214
-6.5023	0.27269	-1.4979	0.25227	4.8928	0.31918	-3.1208	0.41484	3.6019	0.33973	-2.1293	0.78404	-0.11827	0.32081	6.3907	0.34304	-5.0111	0.06459	3.0025	0.65994	5.7312	0.65995	2.011	0.60322	-6.509	0.2727	6.7226	0.60322	-3.3815	0.40546	-4.373	0.68312	1.6229	0.31651	0.63145	0.7918	8.7337	-1.4912	0.99147	-5.2501	6.2004	5	16	0.39712	498	967	8.9758	7.6913	0.16699	120.85
-6.5023	0.2731	-1.4979	0.27131	4.8928	0.40547	-3.1208	0.62226	3.6019	0.39706	-0.40546	1.944	-0.11827	0.40038	6.3907	0.55503	-5.0111	0.04429	3.0025	1.3816	4.0073	1.3816	0.28719	1.2977	-6.509	0.27304	6.7226	1.2977	-3.3815	0.52584	-6.0968	2.123	1.6229	0.40886	-1.0924	2.2189	7.0098	-1.4912	2.7153	-3.5262	6.2004	5	11	0.6522	1223	968	9.8174	8.4056	0.16796	144.57
-6.5023	0.65349	-1.4979	1.5895	4.8928	1.4061	-1.1974	1.6122	-0.28768	2.8046	-7.3008	0.53214	-0.11827	2.5365	6.3907	3.1912	-5.0111	0.89893	1.0792	2.6649	7.0131	2.6649	7.1825	4.0756	-6.509	0.65516	0.90975	4.0756	-5.3049	2.2848	0.79851	0.086307	-0.30042	3.2063	5.8029	1.4348	8.0923	-1.4912	-6.1034	-8.4982	5.5305	2	4	1.433	220000	969	1.3361	1.3228	0.010081	2.6778
-6.5023	0.40547	-1.4979	1.6015	4.8928	1.6477	-1.1974	1.9234	-0.28768	3.2632	-5.577	1.1895	-0.11827	3.1056	6.3907	3.4152	-5.0111	0.90934	1.0792	2.8091	5.2893	2.8091	5.4587	4.9629	-6.509	0.40059	0.90975	4.9629	-5.3049	1.8396	-0.92532	0.4291	-0.30042	3.9066	4.0791	2.0571	6.3684	-1.4912	-4.3795	-6.7744	5.5305	1	3	1.6718	91556	970	3.1352	3.0628	0.023642	14.744
-6.5023	0.517	-1.4979	1.5973	4.8928	3.7009	-1.1974	2.1308	-0.28768	3.1486	-3.8531	1.9735	-0.11827	5.5338	6.3907	5.4698	-5.0111	0.58689	1.0792	4.3063	3.5655	4.3063	3.7349	5.6561	-6.509	0.51795	0.90975	5.6561	-5.3049	2.5956	-2.6491	1.9303	-0.30042	3.1529	2.3553	2.6604	4.6446	-1.4912	-2.6557	-5.0506	5.5305	1	3	2.178	23618	971	7.0739	6.4792	0.091796	75.061
-6.5023	0.40547	-1.4979	1.2179	4.8928	0.92305	-1.1974	1.8196	0.68471	1.8322	-7.3008	0.53433	-0.11827	1.8692	6.3907	2.4609	-5.0111	0.77571	1.0792	1.9248	7.9855	1.9248	7.1825	3.4037	-6.509	0.40881	1.8821	3.4037	-5.3049	2.3244	0.79851	0.039098	-0.30042	3.2758	5.8029	1.2888	9.0647	-1.4912	-6.1034	-8.4982	5.5305	2	4	1.1221	155000	972	1.3358	1.3228	0.0098703	2.6767
-6.5023	0.38146	-1.4979	1.1436	4.8928	0.80227	-1.1974	1.7066	0.68471	2.1188	-5.577	0.78405	-0.11827	1.9427	6.3907	2.3317	-5.0111	0.69089	1.0792	2.038	6.2617	2.038	5.4587	3.7115	-6.509	0.38299	1.8821	3.7115	-5.3049	1.6752	-0.92532	0.059082	-0.30042	3.5677	4.0791	1.5119	7.3408	-1.4912	-4.3795	-6.7744	5.5305	1	4	1.1561	50430	973	3.1345	3.0627	0.023437	14.738
-6.5023	0.40547	-1.4979	1.0924	4.8928	1.8892	-1.1974	2.2345	0.68471	2.3481	-3.8531	2.18	-0.11827	2.4	6.3907	2.659	-5.0111	0.36308	1.0792	2.0932	4.5379	2.0932	3.7349	3.8649	-6.509	0.40458	1.8821	3.8649	-5.3049	2.5944	-2.6491	1.7819	-0.30042	2.8146	2.3553	1.9165	5.617	-1.4912	-2.6557	-5.0506	5.5305	1	3	1.6916	13985	974	7.0722	6.4787	0.091603	75.024
-6.5023	0.52244	-1.4979	2.5976	4.8928	6.7202	-1.1974	3.1679	0.68471	2.1762	-2.1293	2.9515	-0.11827	9.1495	6.3907	10.145	-5.0111	1.0362	1.0792	5.9939	2.814	5.9939	2.011	6.1791	-6.509	0.52403	1.8821	6.1791	-5.3049	4.1107	-4.373	3.9694	-0.30042	6.3738	0.63145	6.1819	3.8932	-1.4912	-0.93188	-3.3267	5.5305	1	2	3.0226	6880	975	13.48	10.243	0.31606	272.57
-6.5023	0.40547	-1.4979	0.96417	4.8928	0.6815	-1.1974	2.1214	1.6571	1.2611	-7.3008	0.52846	-0.11827	1.4407	6.3907	1.9409	-5.0111	0.69693	1.0792	1.437	8.9579	1.437	7.1825	2.928	-6.509	0.40205	2.8545	2.928	-5.3049	2.4513	0.79851	0.026905	-0.30042	3.3732	5.8029	1.1741	10.037	-1.4912	-6.1034	-8.4982	5.5305	3	6	0.99368	107000	976	1.3357	1.3228	0.0097847	2.6762
-6.5023	0.2737	-1.4979	0.89305	4.8928	0.56073	-1.1974	1.8103	1.6571	1.4331	-5.577	0.78405	-0.11827	1.4624	6.3907	1.7556	-5.0111	0.59239	1.0792	1.7589	7.2341	1.7589	5.4587	3.1599	-6.509	0.27336	2.8545	3.1599	-5.3049	1.7253	-0.92532	0.03834	-0.30042	3.6463	4.0791	1.3925	8.3132	-1.4912	-4.3795	-6.7744	5.5305	2	5	0.95915	30193	977	3.1342	3.0627	0.023358	14.735
-6.5023	0.38229	-1.4979	0.57089	4.8928	0.92305	-1.1974	1.9234	1.6571	1.4904	-3.8531	1.2278	-0.11827	1.368	6.3907	1.5962	-5.0111	0.21545	1.0792	1.3325	5.5102	1.3325	3.7349	2.8243	-6.509	0.38364	2.8545	2.8243	-5.3049	2.4384	-2.6491	1.0896	-0.30042	2.6791	2.3553	1.0728	6.5894	-1.4912	-2.6557	-5.0506	5.5305	2	4	1.0863	7339	978	7.0716	6.4786	0.09153	75.011
-6.5023	0.40547	-1.4979	2.5016	4.8928	6.5994	-1.1974	4.1013	1.6571	1.4904	-2.1293	3.8853	-0.11827	10.108	6.3907	10.459	-5.0111	1.5098	1.0792	6.0082	3.7864	6.0082	2.011	6.1749	-6.509	0.40555	2.8545	6.1749	-5.3049	4.4378	-4.373	4.2486	-0.30042	6.9629	0.63145	6.7855	4.8655	-1.4912	-0.93188	-3.3267	5.5305	1	2	3.1639	3794	979	13.478	10.241	0.31605	272.49
-6.5023	0.40547	-1.4979	0.78403	4.8928	0.56073	-1.1974	2.3382	2.6295	0.80462	-7.3008	0.43299	-0.11827	1.1359	6.3907	1.4749	-5.0111	0.63494	1.0792	1.0816	9.9303	1.0816	7.1825	2.4168	-6.509	0.39929	3.8269	2.4168	-5.3049	2.5425	0.79851	0.021225	-0.30042	3.3748	5.8029	1.047	11.009	-1.4912	-6.1034	-8.4982	5.5305	3	6	0.88767	66203	980	1.3357	1.3228	0.0097595	2.6761
-6.5023	0.2705	-1.4979	0.65673	4.8928	0.40547	-1.1974	1.9234	2.6295	0.80042	-5.577	0.69008	-0.11827	1.0195	6.3907	1.1779	-5.0111	0.45877	1.0792	1.3492	8.2065	1.3492	5.4587	2.4874	-6.509	0.26598	3.8269	2.4874	-5.3049	1.7707	-0.92532	0.044261	-0.30042	3.5018	4.0791	1.3342	9.2856	-1.4912	-4.3795	-6.7744	5.5305	4	7	0.79109	14921	981	3.1341	3.0627	0.023326	14.734
-6.5023	0.27379	-1.4979	0.3896	4.8928	0.40547	-1.1974	1.9234	2.6295	0.7473	-3.8531	0.84582	-0.11827	0.74183	6.3907	0.91481	-5.0111	0.16845	1.0792	0.93852	6.4826	0.93851	3.7349	2.1385	-6.509	0.27304	3.8269	2.1385	-5.3049	1.8564	-2.6491	0.344	-0.30042	2.622	2.3553	0.74973	7.5618	-1.4912	-2.6557	-5.0506	5.5305	4	9	0.76422	3615	982	7.0713	6.4785	0.091503	75.005
-6.5023	0.40547	-1.4979	1.7155	4.8928	5.9956	-1.1974	4.8273	2.6295	1.0912	-2.1293	4.6372	-0.11827	10.842	6.3907	10.577	-5.0111	1.6566	1.0792	6.0103	4.7588	6.0103	2.011	6.1833	-6.509	0.39886	3.8269	6.1833	-5.3049	4.5561	-4.373	4.366	-0.30042	6.6747	0.63145	6.4845	5.8379	-1.4912	-0.93188	-3.3267	5.5305	1	2	3.112	1646	983	13.477	10.241	0.31605	272.46
-6.5023	0.41351	-1.4979	3.5382	4.8928	7.6864	-1.1974	4.5162	2.6295	0.68998	-0.40546	5.1393	-0.11827	10.575	6.3907	11.279	-5.0111	2.135	1.0792	6.0408	3.0349	6.0408	0.28719	5.4203	-6.509	0.42006	3.8269	5.4203	-5.3049	5.2387	-6.0968	5.8667	-0.30042	8.3322	-1.0924	8.9274	4.1141	-1.4912	0.79197	-1.6029	5.5305	2	3	3.6639	2728	984	17.769	11.567	0.53621	473.61
-6.5023	0.27153	-1.4979	0.49065	4.8928	0.31918	-1.1974	2.1308	3.6019	0.34814	-5.577	0.40814	-0.11827	0.75798	6.3907	0.78773	-5.0111	0.40482	1.0792	1.3714	9.1788	1.3714	5.4587	1.9985	-6.509	0.26644	4.7993	1.9985	-5.3049	1.829	-0.92532	0.060249	-0.30042	3.5709	4.0791	1.2389	10.258	-1.4912	-4.3795	-6.7744	5.5305	5	8	0.6614	6584	985	3.1341	3.0627	0.023317	14.734
-6.5023	0.27333	-1.4979	0.3262	4.8928	0.31918	-1.1974	2.1308	3.6019	0.34814	-3.8531	0.65786	-0.11827	0.48652	6.3907	0.55464	-5.0111	0.18325	1.0792	1.0116	7.455	1.0116	3.7349	1.6327	-6.509	0.27191	4.7993	1.6327	-5.3049	1.7253	-2.6491	0.31149	-0.30042	2.61	2.3553	0.69232	8.5342	-1.4912	-2.6557	-5.0506	5.5305	5	11	0.67592	1663	986	7.0712	6.4785	0.091496	75.004
-6.5023	0.2341	-1.4979	0.23641	4.8928	0.30192	-1.1974	0.70895	3.6019	0.29355	-2.1293	0.37829	-0.11827	0.29334	6.3907	0.29396	-5.0111	0.019868	1.0792	0.56297	5.7312	0.56297	2.011	0.58991	-6.509	0.23418	4.7993	0.58991	-5.3049	0.67612	-4.373	0.33592	-0.30042	0.68188	0.63145	0.32802	6.8103	-1.4912	-0.93188	-3.3267	5.5305	6	18	0.35887	2383	987	13.477	10.241	0.31605	272.45
-6.5023	0.40547	-1.4979	3.7129	4.8928	7.8072	-1.1974	5.2421	3.6019	0.17617	-0.40546	5.8911	-0.11827	11.309	6.3907	11.801	-5.0111	2.5461	1.0792	6.0626	4.0073	6.0626	0.28719	5.4183	-6.509	0.40536	4.7993	5.4183	-5.3049	5.7574	-6.0968	6.3707	-0.30042	9.1905	-1.0924	9.8286	5.0865	-1.4912	0.79197	-1.6029	5.5305	2	3	3.8725	1119	988	17.768	11.566	0.53628	473.55
-6.5023	1.6963	-1.4979	2.4777	2.6197	2.0747	-1.1974	0.88624	-0.28768	2.6326	-7.3008	0.71565	-2.3914	2.2591	4.1176	3.4551	-5.0111	1.3123	-1.194	1.9217	7.0131	1.9217	4.9094	3.2843	-6.509	1.6913	0.90975	3.2843	-5.3049	2.3844	0.79851	0.53096	-0.30042	2.858	5.8029	1.6953	5.8191	-1.4912	-6.1034	-8.4982	3.2913	1	2	1.7472	440000	897	1.3499	1.333	0.012719	2.7334
-6.5023	1.1631	-1.4979	2.2305	4.8928	3.9424	0.72595	2.8096	-0.28768	2.5753	-5.577	0.83509	-0.11827	5.5057	6.3907	6.2186	-5.0111	1.1108	-0.84423	3.2715	5.2893	3.2715	5.4587	5.9853	-6.509	1.1595	-1.0136	5.9853	-7.2282	3.897	-0.92532	1.2101	-2.2238	5.3345	4.0791	2.2569	4.4451	-1.4912	-6.3029	-4.851	4.074	0	0	2.2593	175000	990	3.1496	3.0712	0.025532	14.88
-6.5023	1.1708	-1.4979	2.1034	2.6197	1.8332	-1.1974	1.1974	0.68471	1.7749	-7.3008	0.53439	-2.3914	1.8888	4.1176	2.3596	-5.0111	1.1294	-1.194	1.5759	7.9855	1.5759	4.9094	2.6857	-6.509	1.1696	1.8821	2.6857	-5.3049	2.3066	0.79851	0.23989	-0.30042	3.043	5.8029	1.6081	6.7915	-1.4912	-6.1034	-8.4982	3.2913	1	2	1.4357	338000	899	1.3472	1.3329	0.010728	2.7223
-6.5023	0.72199	-1.4979	1.9384	4.8928	2.7892	0.72595	3.2981	0.68471	2.0338	-5.577	1.0139	-0.11827	4.4651	6.3907	4.9191	-5.0111	1.0008	-0.84423	3.0052	6.2617	3.0052	5.4587	5.6912	-6.509	0.72122	-0.041241	5.6912	-7.2282	3.8294	-0.92532	0.97441	-2.2238	5.6623	4.0791	2.2786	5.4175	-1.4912	-6.3029	-4.851	4.074	1	2	1.9659	1040000	992	3.1449	3.0709	0.024126	14.836
-6.5023	0.8163	-1.4979	1.877	4.8928	5.2709	0.72595	3.6393	0.68471	1.8895	-3.8531	1.5037	-0.11827	7.12	6.3907	7.6656	-5.0111	0.69915	-0.84423	3.7278	4.5379	3.7278	3.7349	6.1922	-6.509	0.82281	-0.041241	6.1922	-7.2282	4.5392	-2.6491	2.1482	-2.2238	5.341	2.3553	3.0134	3.6936	-1.4912	-4.5791	-3.1272	4.074	0	1	2.4995	29840	993	7.176	6.5619	0.093585	77.242
-6.5023	0.65242	-1.4979	1.5858	4.8928	1.4061	0.72595	3.3282	1.6571	1.2611	-7.3008	0.53149	-0.11827	2.5251	6.3907	3.169	-5.0111	0.89	-0.84423	1.3644	8.9579	1.3644	7.1825	4.0571	-6.509	0.65398	0.93113	4.0571	-7.2282	4.1838	0.79851	0.083341	-2.2238	5.1323	5.8029	1.4253	8.1137	-1.4912	-8.0268	-6.5748	4.074	2	4	1.4609	219000	994	1.3367	1.3234	0.010052	2.6803
-6.5023	0.40547	-1.4979	1.5822	4.8928	1.6477	0.72595	3.743	1.6571	1.4904	-5.577	1.1895	-0.11827	3.0968	6.3907	3.4047	-5.0111	0.90097	-0.84423	2.4393	7.2341	2.4393	5.4587	4.9359	-6.509	0.39975	0.93113	4.9359	-7.2282	3.739	-0.92532	0.41704	-2.2238	5.8395	4.0791	2.0535	6.3898	-1.4912	-6.3029	-4.851	4.074	1	3	1.6764	88717	995	3.1432	3.0707	0.023596	14.82
-6.5023	0.52203	-1.4979	1.5683	4.8928	4.184	0.72595	4.1579	1.6571	1.3758	-3.8531	1.9887	-0.11827	6.9617	6.3907	6.7595	-5.0111	0.51209	-0.84423	3.6153	5.5102	3.6153	3.7349	6.0605	-6.509	0.52363	0.93113	6.0605	-7.2282	4.5358	-2.6491	2.1744	-2.2238	5.175	2.3553	2.9431	4.666	-1.4912	-4.5791	-3.1272	4.074	1	3	2.2994	21572	996	7.1717	6.5608	0.093114	77.149
-6.5023	0.40547	-1.4979	1.2077	4.8928	0.92305	0.72595	3.6393	2.6295	0.91507	-7.3008	0.53433	-0.11827	1.8537	6.3907	2.4467	-5.0111	0.76993	-0.84423	1.3087	9.9303	1.3087	7.1825	3.382	-6.509	0.40812	1.9035	3.382	-7.2282	4.2235	0.79851	0.038593	-2.2238	5.1922	5.8029	1.2697	9.0861	-1.4912	-8.0268	-6.5748	4.074	2	4	1.2708	155000	997	1.3364	1.3234	0.0098473	2.6791
-6.5023	0.38021	-1.4979	1.1243	4.8928	0.80227	0.72595	3.4319	2.6295	0.80462	-5.577	0.78405	-0.11827	1.8949	6.3907	2.3005	-5.0111	0.67699	-0.84423	1.5205	8.2065	1.5205	5.4587	3.6961	-6.509	0.38137	1.9035	3.6961	-7.2282	3.5503	-0.92532	0.054704	-2.2238	5.4815	4.0791	1.5015	7.3622	-1.4912	-6.3029	-4.851	4.074	1	4	1.2212	48308	998	3.1425	3.0707	0.023393	14.813
-6.5023	0.40547	-1.4979	1.052	4.8928	2.01	0.72595	4.2616	2.6295	0.86194	-3.8531	2.4538	-0.11827	2.3665	6.3907	2.6037	-5.0111	0.29953	-0.84423	2.8657	6.4826	2.8657	3.7349	3.9416	-6.509	0.40513	1.9035	3.9416	-7.2282	4.5063	-2.6491	2.038	-2.2238	4.689	2.3553	2.0961	5.6384	-1.4912	-4.5791	-3.1272	4.074	1	3	1.8408	12411	999	7.1701	6.5603	0.092945	77.115
-6.5023	0.64328	-1.4979	2.9046	4.8928	7.0825	0.72595	5.5061	2.6295	0.68998	-2.1293	3.1335	-0.11827	9.5125	6.3907	10.62	-5.0111	1.3629	-0.84423	4.0854	4.7588	4.0855	2.011	6.3707	-6.509	0.64768	1.9035	6.3707	-7.2282	6.5283	-4.373	4.2089	-2.2238	8.8686	0.63145	6.5681	3.9146	-1.4912	-2.8553	-1.4034	4.074	2	3	3.3267	5229	1000	14.339	10.616	0.35065	308.41
-6.5023	0.40547	-1.4979	0.94995	4.8928	0.6815	0.72595	3.9504	3.6019	0.85564	-7.3008	0.52801	-0.11827	1.4309	6.3907	1.9281	-5.0111	0.69124	-0.84423	1.9189	10.903	1.9189	7.1825	2.9066	-6.509	0.40216	2.8759	2.9066	-7.2282	4.357	0.79851	0.026761	-2.2238	5.2823	5.8029	1.1614	10.058	-1.4912	-8.0268	-6.5748	4.074	3	6	1.2285	106000	1001	1.3363	1.3234	0.0097707	2.6787
-6.5023	0.27359	-1.4979	0.88939	4.8928	0.43995	0.72595	3.743	3.6019	0.56902	-5.577	0.78405	-0.11827	1.4189	6.3907	1.6962	-5.0111	0.56928	-0.84423	2.1181	9.1788	2.1181	5.4587	3.1495	-6.509	0.27287	2.8759	3.1495	-7.2282	3.6399	-0.92532	0.042058	-2.2238	5.6255	4.0791	1.3995	8.3346	-1.4912	-6.3029	-4.851	4.074	3	6	1.1165	28584	1002	3.1423	3.0707	0.023319	14.811
-6.5023	0.27506	-1.4979	0.46542	4.8928	0.80227	0.72595	3.743	3.6019	0.5117	-3.8531	1.2217	-0.11827	1.1452	6.3907	1.413	-5.0111	0.13854	-0.84423	2.3172	7.455	2.3172	3.7349	2.68	-6.509	0.27969	2.8759	2.68	-7.2282	4.2848	-2.6491	1.0388	-2.2238	4.5219	2.3553	0.78184	6.6108	-1.4912	-4.5791	-3.1272	4.074	3	5	1.1699	6097	1003	7.1694	6.5602	0.092867	77.101
-6.5023	0.40547	-1.4979	2.9857	4.8928	7.0825	0.72595	6.1284	3.6019	0.39706	-2.1293	3.8045	-0.11827	10.211	6.3907	10.957	-5.0111	1.8283	-0.84423	4.0935	5.7312	4.0935	2.011	6.3728	-6.509	0.40555	2.8759	6.3728	-7.2282	6.8507	-4.373	4.5626	-2.2238	9.5858	0.63145	7.3263	4.8869	-1.4912	-2.8553	-1.4034	4.074	2	3	3.4673	2951	1004	14.337	10.615	0.35065	308.33
-6.5023	0.7356	1.0043	1.9758	-4.1997	2.1308	-6.9675	2.7059	0.68471	1.9755	-7.3008	2.7524	-11.707	2.7319	-5.204	1.7189	-7.5072	1.9718	-4.7394	0.040163	7.9855	0.040162	-4.4061	0.029592	-6.5028	0.73607	7.6522	0.02959	0.46522	1.6746	0.79851	1.7137	7.9718	2.1554	8.3051	2.1653	3.2461	1.0049	-0.33329	-14.268	0.0054714	1	6	2.046	8048	1005	13.862	9.7948	0.41526	288.24
-6.5023	0.51067	1.0043	2.0865	-4.1997	2.01	-6.9675	1.8762	1.6571	1.2611	-7.3008	1.944	-11.707	1.9421	-5.204	1.6407	-7.5072	1.618	-4.7394	0.034239	8.9579	0.034237	-4.4061	0.03092	-6.5028	0.50674	8.6246	0.030918	0.46522	1.6058	0.79851	1.6404	7.9718	1.9722	8.3051	1.9915	4.2185	1.0049	-0.33329	-14.268	0.0054714	1	6	1.6148	5381	1006	13.859	9.7918	0.41535	288.1
-6.5023	0.52875	1.0043	2.2201	-4.1997	1.5269	-6.9675	0.94279	2.6295	0.63265	-7.3008	1.0042	-11.707	0.97042	-5.204	1.402	-7.5072	1.354	-4.7394	0.027629	9.9303	0.027624	-4.4061	0.033794	-6.5028	0.52874	9.597	0.033801	0.46522	1.3963	0.79851	1.396	7.9718	1.9475	8.3051	1.9755	5.1909	1.0049	-0.33329	-14.268	0.0054714	2	7	1.1426	3195	1007	13.857	9.7906	0.41538	288.04
-6.5023	0.67164	1.0043	1.8564	-4.1997	1.0438	-6.9675	0.73536	2.6295	0.68998	-5.577	0.78405	-11.707	0.73547	-5.204	0.86535	-7.5072	0.91537	-4.7394	0.01037	8.2065	0.010371	-6.1299	0.069256	-6.5028	0.6719	9.597	0.069256	0.46522	0.84842	-0.92532	0.8889	7.9718	1.3729	6.5813	1.3359	3.4671	1.0049	1.3905	-12.544	0.0054714	3	9	0.96354	3418	1008	19.194	10.701	0.79372	552.61
-6.5023	0.40547	1.0043	2.4869	-4.1997	1.5269	-6.9675	0.40547	3.6019	0.2335	-7.3008	0.39175	-11.707	0.41051	-5.204	1.8849	-7.5072	1.5328	-4.7394	0.023571	10.903	0.02357	-4.4061	0.0297	-6.5028	0.40512	10.569	0.029702	0.46522	1.884	0.79851	1.8819	7.9718	2.6069	8.3051	2.6553	6.1633	1.0049	-0.33329	-14.268	0.0054714	4	10	0.90833	1258	1009	13.857	9.7902	0.41539	288.02
-6.5023	0.27451	1.0043	1.7905	-4.1997	1.0438	-6.9675	0.32052	3.6019	0.2335	-5.577	0.30446	-11.707	0.3072	-5.204	0.41725	-7.5072	1.1069	-4.7394	0.0096955	9.1788	0.0096951	-6.1299	0.084946	-6.5028	0.28205	10.569	0.084944	0.46522	0.40367	-0.92532	0.42169	7.9718	1.728	6.5813	1.7182	4.4395	1.0049	1.3905	-12.544	0.0054714	4	13	0.66123	1110	1010	19.192	10.698	0.79398	552.49
-6.5023	0.40547	1.0043	1.1865	-4.1997	1.4061	-5.0441	0.88624	2.6295	0.68998	-7.3008	0.91024	-11.707	0.88814	-5.204	1.2757	-7.5072	0.71967	-6.6627	0.071028	9.9303	0.07103	-4.4061	0.013817	-6.5028	0.40629	7.6736	0.013817	-1.4581	1.2629	0.79851	1.2671	6.0485	1.751	8.3051	1.7599	3.2675	1.0049	-2.2567	-12.345	0.0054604	2	8	0.91409	4610	1011	17.277	15.783	0.094681	447.76
-6.5023	0.40547	1.0043	1.216	-4.1997	1.2854	-5.0441	0.16025	3.6019	0.16777	-7.3008	0.25239	-11.707	0.23647	-5.204	1.4405	-7.5072	0.62793	-6.6627	0.076214	10.903	0.076214	-4.4061	0.015918	-6.5028	0.40595	8.646	0.015918	-1.4581	1.399	0.79851	1.4422	6.0485	2.3345	8.3051	2.3707	4.2399	1.0049	-2.2567	-12.345	0.0054604	4	11	0.58122	1494	1012	17.275	15.782	0.094558	447.62
-6.5023	2.2454	1.0043	1.9853	-1.9265	1.3501	-6.9675	2.7059	-0.28768	2.4607	-7.3008	2.7063	-9.4337	2.8279	-2.9309	1.5371	-7.5072	3.4727	-2.4662	0.11066	7.0131	0.11066	-2.1329	0.029501	-6.5028	2.2229	6.6798	0.0295	0.46522	1.4237	0.79851	1.5185	7.9718	2.4319	8.3051	2.4323	4.5469	1.0049	-0.33329	-14.268	0.051902	0	4	2.2423	16199	1013	4.5559	3.2577	0.3985	31.135
-6.5023	1.9661	1.0043	1.8405	-1.9265	1.3501	-6.9675	1.9799	0.68471	1.7749	-7.3008	1.944	-9.4337	1.9656	-2.9309	1.2255	-7.5072	2.6768	-2.4662	0.10139	7.9855	0.10139	-2.1329	0.026941	-6.5028	1.953	7.6522	0.026938	0.46522	1.1187	0.79851	1.2292	7.9718	1.8457	8.3051	1.851	5.5193	1.0049	-0.33329	-14.268	0.051902	0	4	1.8093	11224	1014	4.5531	3.2553	0.39867	31.096
-6.5023	1.6206	1.0043	1.4324	-1.9265	1.3501	-6.9675	1.4613	0.68471	1.5456	-5.577	1.5359	-9.4337	1.5124	-2.9309	0.29552	-7.5072	1.8069	-2.4662	0.055737	6.2617	0.055736	-3.8568	0.17141	-6.5028	1.6195	7.6522	0.17141	0.46522	0.23627	-0.92532	0.46257	7.9718	1.6941	6.5813	1.7112	3.7955	1.0049	1.3905	-12.544	0.051902	0	7	1.491	7406	1015	6.3104	3.6278	0.73946	59.732
-6.5023	1.5961	1.0043	1.7057	-1.9265	1.3501	-6.9675	1.2539	1.6571	1.2038	-7.3008	1.2671	-9.4337	1.2324	-2.9309	1.0863	-7.5072	2.1051	-2.4662	0.097026	8.9579	0.097022	-2.1329	0.025106	-6.5028	1.5943	8.6246	0.025107	0.46522	0.97131	0.79851	1.0881	7.9718	1.4721	8.3051	1.4993	6.4917	1.0049	-0.33329	-14.268	0.051902	0	4	1.3961	7623	1016	4.552	3.2543	0.39874	31.08
-6.5023	1.1672	1.0043	1.3252	-1.9265	1.3501	-6.9675	0.94279	1.6571	1.0318	-5.577	0.97201	-9.4337	0.97696	-2.9309	0.2766	-7.5072	1.5263	-2.4662	0.052879	7.2341	0.052883	-3.8568	0.16478	-6.5028	1.1616	8.6246	0.16478	0.46522	0.21174	-0.92532	0.44029	7.9718	1.424	6.5813	1.4174	4.7678	1.0049	1.3905	-12.544	0.051902	0	7	1.1315	5399	1017	6.306	3.6222	0.74095	59.648
-6.5023	1.1918	1.0043	1.5857	-1.9265	1.4277	-6.9675	0.63166	2.6295	0.63265	-7.3008	0.53495	-9.4337	0.56801	-2.9309	1.0137	-7.5072	1.7101	-2.4662	0.091678	9.9303	0.09168	-2.1329	0.022869	-6.5028	1.1898	9.597	0.022865	0.46522	0.87547	0.79851	1.0151	7.9718	1.386	8.3051	1.4329	7.4641	1.0049	-0.33329	-14.268	0.051902	3	8	1.0007	4628	1018	4.5516	3.254	0.39876	31.075
-6.5023	0.64568	1.0043	1.3647	-1.9265	1.3501	-6.9675	0.51734	2.6295	0.518	-5.577	0.53165	-9.4337	0.48165	-2.9309	0.25973	-7.5072	1.3585	-2.4662	0.052545	8.2065	0.052542	-3.8568	0.15428	-6.5028	0.64319	9.597	0.15428	0.46522	0.2046	-0.92532	0.43022	7.9718	1.3517	6.5813	1.3483	5.7402	1.0049	1.3905	-12.544	0.051902	4	13	0.82125	3356	1019	6.3043	3.62	0.7415	59.616
-6.5023	0.53038	1.0043	1.4056	-1.9265	1.4277	-6.9675	0.42423	2.6295	0.68578	-3.8531	0.65786	-9.4337	0.46075	-2.9309	0.14026	-7.5072	1.4416	-2.4662	0.027949	6.4826	0.027951	-5.5806	0.54771	-6.5028	0.53031	9.597	0.54771	0.46522	0.11791	-2.6491	0.65779	7.9718	1.4077	4.8575	1.4118	4.0164	1.0049	3.1144	-10.821	0.051902	4	13	0.85527	7317	1020	6.8981	3.6922	0.86829	71.376
-6.5023	0.93382	1.0043	1.5934	-1.9265	1.4806	-6.9675	0.20992	3.6019	0.21593	-7.3008	0.2193	-9.4337	0.23088	-2.9309	1.215	-7.5072	1.4617	-2.4662	0.090693	10.903	0.090695	-2.1329	0.021731	-6.5028	0.93164	10.569	0.021726	0.46522	1.1179	0.79851	1.2117	7.9718	1.5731	8.3051	1.6225	8.4364	1.0049	-0.33329	-14.268	0.051902	3	8	0.77549	15162	1021	4.5514	3.2538	0.39878	31.073
-6.5023	0.31856	1.0043	1.3332	-1.9265	1.3147	-6.9675	0.21178	3.6019	0.23896	-5.577	0.23399	-9.4337	0.21399	-2.9309	0.27306	-7.5072	1.324	-2.4662	0.051531	9.1788	0.051526	-3.8568	0.15577	-6.5028	0.32041	10.569	0.15577	0.46522	0.21978	-0.92532	0.43935	7.9718	1.3282	6.5813	1.347	6.7126	1.0049	1.3905	-12.544	0.051902	4	13	0.60854	11759	1022	6.3037	3.6192	0.74172	59.604
-6.5023	0.38944	1.0043	1.3504	-1.9265	1.3501	-6.9675	0.30175	3.6019	0.29082	-3.8531	0.2945	-9.4337	0.30127	-2.9309	0.16413	-7.5072	1.3453	-2.4662	0.032381	7.455	0.032386	-5.5806	0.5075	-6.5028	0.38786	10.569	0.5075	0.46522	0.13735	-2.6491	0.6347	7.9718	1.3426	4.8575	1.3397	4.9888	1.0049	3.1144	-10.821	0.051902	4	13	0.66283	3289	1023	6.8949	3.6877	0.8697	71.309
-6.5023	0.63768	1.0043	1.4028	-1.9265	1.3501	-6.9675	0.52794	3.6019	0.5117	-2.1293	0.56722	-9.4337	0.50089	-2.9309	0.14623	-7.5072	1.4294	-2.4662	0.029534	5.7312	0.029533	-7.3044	1.4137	-6.5028	0.62968	10.569	1.4137	0.46522	0.12046	-4.373	1.5184	7.9718	1.4007	3.1336	1.5085	3.265	1.0049	4.8382	-9.0968	0.051902	4	10	0.83291	8851	1024	7.0274	3.7129	0.89269	74.077
-6.5023	1.2997	1.0043	1.7133	-1.9265	2.3939	-5.0441	2.4419	0.68471	1.431	-7.3008	2.7898	-9.4337	3.2196	-2.9309	3.0856	-7.5072	2.6605	-4.3896	0.46119	7.9855	0.4612	-2.1329	0.30121	-6.5028	1.2907	5.7289	0.30121	-1.4581	1.7868	0.79851	2.5843	6.0485	3.2175	8.3051	3.9088	3.5959	1.0049	-2.2567	-12.345	0.051801	0	4	2.0116	45798	1025	5.6831	5.1977	0.093385	48.446
-6.5023	0.89903	1.0043	1.7959	-1.9265	2.877	-5.0441	1.9234	1.6571	1.2038	-7.3008	2.6931	-9.4337	3.8849	-2.9309	4.0537	-7.5072	2.5682	-4.3896	1.2628	8.9579	1.2628	-2.1329	0.68676	-6.5028	0.87553	6.7012	0.68676	-1.4581	1.7768	0.79851	2.9272	6.0485	3.2885	8.3051	4.5917	4.5683	1.0049	-2.2567	-12.345	0.051801	0	2	1.8987	36875	1026	5.677	5.1962	0.092537	48.343
-6.5023	0.52262	1.0043	1.8764	-1.9265	4.2055	-5.0441	1.5085	2.6295	0.86194	-7.3008	2.9778	-9.4337	6.2639	-2.9309	5.9183	-7.5072	2.5226	-4.3896	3.2369	9.9303	3.2369	-2.1329	1.8245	-6.5028	0.51736	7.6736	1.8245	-1.4581	1.7652	0.79851	2.9951	6.0485	3.4113	8.3051	5.408	5.5407	1.0049	-2.2567	-12.345	0.051801	1	2	1.9921	26404	1027	5.6748	5.1956	0.092224	48.304
-6.5023	0.69628	1.0043	2.0464	-1.9265	2.1955	-5.0441	1.2979	2.6295	0.80462	-5.577	1.2539	-9.4337	1.2755	-2.9309	3.0195	-7.5072	2.3627	-4.3896	0.12781	8.2065	0.12781	-3.8568	0.029927	-6.5028	0.69674	7.6736	0.029926	-1.4581	2.4325	-0.92532	2.914	6.0485	2.8626	6.5813	2.9572	3.8169	1.0049	-0.53283	-10.621	0.051801	1	6	1.3825	8413	1028	11.211	8.2784	0.35429	188.54
-6.5023	0.40547	1.0043	2.1026	-1.9265	5.4133	-5.0441	1.7159	3.6019	0.68367	-7.3008	3.5416	-9.4337	7.6914	-2.9309	7.2291	-7.5072	2.6031	-4.3896	4.9132	10.903	4.9132	-2.1329	3.0712	-6.5028	0.41091	8.646	3.0712	-1.4581	1.778	0.79851	3.121	6.0485	3.5728	8.3051	5.8014	6.5131	1.0049	-2.2567	-12.345	0.051801	2	3	2.3104	16152	1029	5.6739	5.1954	0.092103	48.29
-6.5023	0.51306	1.0043	2.1498	-1.9265	2.3163	-5.0441	1.3954	3.6019	0.68367	-5.577	1.4731	-9.4337	1.4953	-2.9309	3.4126	-7.5072	2.0697	-4.3896	0.13187	9.1788	0.13187	-3.8568	0.029506	-6.5028	0.50529	8.646	0.029506	-1.4581	2.5539	-0.92532	2.9585	6.0485	3.372	6.5813	3.4552	4.7893	1.0049	-0.53283	-10.621	0.051801	2	7	1.4219	5629	1030	11.209	8.2766	0.3543	188.46
-6.5023	0.51117	1.0043	1.1723	-1.9265	2.3163	-3.1208	1.2445	2.6295	0.80462	-7.3008	1.1922	-9.4337	1.2282	-2.9309	2.7022	-7.5072	1.167	-6.313	0.7515	9.9303	0.7515	-2.1329	0.062089	-6.5028	0.50913	5.7503	0.062085	-3.3815	1.7213	0.79851	2.4474	4.1251	1.6297	8.3051	2.0076	3.6173	1.0049	-4.18	-10.422	0.051115	1	4	1.2068	75231	1031	5.927	5.8327	0.016165	52.693
-6.5023	0.40034	1.0043	0.96588	-1.9265	4.4471	-3.1208	1.2446	3.6019	0.34814	-7.3008	2.5079	-9.4337	4.5437	-2.9309	4.7929	-7.5072	0.97599	-6.313	2.4783	10.903	2.4783	-2.1329	0.49263	-6.5028	0.40033	6.7226	0.49262	-3.3815	1.9272	0.79851	2.9192	4.1251	1.9386	8.3051	2.5711	4.5897	1.0049	-4.18	-10.422	0.051115	2	5	1.6523	30687	1032	5.9213	5.8324	0.015244	52.593
-6.5023	1.607	1.0043	2.115	0.34656	1.6908	-6.9675	1.7658	-0.28768	1.8875	-7.3008	2.2946	-7.1606	2.1882	-0.65777	0.5492	-7.5072	3.8554	-0.19311	0.32889	7.0131	0.32889	0.14018	0.093421	-6.5028	1.5907	6.6798	0.093423	0.46522	0.1534	0.79851	0.45347	7.9718	3.9394	8.3051	4.051	6.82	1.0049	-0.33329	-14.268	0.4169	0	7	1.8934	19069	1033	1.7544	1.3488	0.30066	4.6168
-6.5023	1.3024	1.0043	1.9668	0.34656	1.9324	-6.9675	1.3389	-0.28768	2.1167	-5.577	2.2164	-7.1606	1.3907	-0.65777	0.10965	-7.5072	2.7472	-0.19311	0.12963	5.2893	0.12964	-1.5836	0.4208	-6.5028	1.2751	6.6798	0.4208	0.46522	0.07897	-0.92532	0.52202	7.9718	2.7393	6.5813	3.132	5.0962	1.0049	1.3905	-12.544	0.4169	0	7	1.8123	14622	1034	2.433	1.66	0.4657	8.8794
-6.5023	1.0507	1.0043	1.6865	0.34656	1.6908	-6.9675	1.0465	-0.28768	2.1167	-3.8531	2.1615	-7.1606	1.1052	-0.65777	0.068883	-7.5072	2.0338	-0.19311	0.037123	3.5655	0.037121	-3.3075	0.94402	-6.5028	1.045	6.6798	0.94402	0.46522	0.053575	-2.6491	0.94088	7.9718	2.0611	4.8575	2.403	3.3724	1.0049	3.1144	-10.821	0.4169	0	4	1.6255	19416	1035	2.6808	1.8061	0.48435	10.78
-6.5023	1.306	1.0043	2.3389	0.34656	1.8116	-6.9675	1.3704	0.68471	1.4883	-7.3008	1.8323	-7.1606	1.8083	-0.65777	0.515	-7.5072	3.5879	-0.19311	0.31378	7.9855	0.31377	0.14018	0.089571	-6.5028	1.2752	7.6522	0.089571	0.46522	0.15338	0.79851	0.43024	7.9718	3.6408	8.3051	3.7007	7.7924	1.0049	-0.33329	-14.268	0.4169	0	7	1.6912	15325	1036	1.7536	1.3483	0.3006	4.6127
-6.5023	0.93299	1.0043	1.9659	0.34656	1.9324	-6.9675	0.94279	0.68471	1.6029	-5.577	1.6427	-7.1606	1.063	-0.65777	0.09864	-7.5072	2.3691	-0.19311	0.11428	6.2617	0.11428	-1.5836	0.35246	-6.5028	0.92956	7.6522	0.35245	0.46522	0.075268	-0.92532	0.4341	7.9718	2.3545	6.5813	2.5876	6.0686	1.0049	1.3905	-12.544	0.4169	0	7	1.5033	11624	1037	2.4299	1.657	0.46643	8.8566
-6.5023	0.80923	1.0043	1.7014	0.34656	1.6908	-6.9675	0.83908	0.68471	1.6603	-3.8531	1.6916	-7.1606	0.86729	-0.65777	0.0677	-7.5072	1.9574	-0.19311	0.03753	4.5379	0.037531	-3.3075	0.86894	-6.5028	0.80907	7.6522	0.86894	0.46522	0.053509	-2.6491	0.86013	7.9718	1.9762	4.8575	2.1933	4.3447	1.0049	3.1144	-10.821	0.4169	0	4	1.3987	16996	1038	2.6649	1.7906	0.48825	10.652
-6.5023	0.91201	1.0043	2.5146	0.34656	2.1739	-6.9675	1.0358	1.6571	1.0318	-7.3008	1.3124	-7.1606	1.3679	-0.65777	0.50271	-7.5072	3.2146	-0.19311	0.30807	8.9579	0.30807	0.14018	0.085396	-6.5028	0.89681	8.6246	0.085398	0.46522	0.1551	0.79851	0.41546	7.9718	3.2161	8.3051	3.2921	8.7648	1.0049	-0.33329	-14.268	0.4169	0	7	1.4967	11461	1039	1.7533	1.3481	0.30058	4.6112
-6.5023	0.64025	1.0043	1.9727	0.34656	1.9324	-6.9675	0.6311	1.6571	1.0891	-5.577	1.1554	-7.1606	0.68359	-0.65777	0.092476	-7.5072	2.1459	-0.19311	0.1031	7.2341	0.1031	-1.5836	0.31302	-6.5028	0.58	8.6246	0.31302	0.46522	0.071859	-0.92532	0.38222	7.9718	2.1382	6.5813	2.2472	7.0409	1.0049	1.3905	-12.544	0.4169	2	11	1.2368	8367	1040	2.4287	1.6559	0.46673	8.848
-6.5023	0.63999	1.0043	1.7204	0.34656	1.6908	-6.9675	0.63166	1.6571	1.1464	-3.8531	1.1278	-7.1606	0.64413	-0.65777	0.065532	-7.5072	1.842	-0.19311	0.038167	5.5102	0.038165	-3.3075	0.77128	-6.5028	0.61177	8.6246	0.77128	0.46522	0.055695	-2.6491	0.75083	7.9718	1.8742	4.8575	1.9085	5.3171	1.0049	3.1144	-10.821	0.4169	2	8	1.1595	11798	1041	2.6588	1.7847	0.48981	10.604
-6.5023	0.91043	1.0043	1.6031	0.34656	1.5701	-6.9675	0.94279	1.6571	1.0891	-2.1293	1.0924	-7.1606	0.95114	-0.65777	0.067387	-7.5072	1.8954	-0.19311	0.029588	3.7864	0.029585	-5.0313	1.2841	-6.5028	0.90147	8.6246	1.2841	0.46522	0.053318	-4.373	1.262	7.9718	1.9227	3.1336	1.6664	3.5933	1.0049	4.8382	-9.0968	0.4169	0	4	1.2013	16965	1042	2.723	1.8318	0.48656	11.122
-6.5023	0.5092	1.0043	2.5968	0.34656	2.4155	-6.9675	0.52903	2.6295	0.518	-7.3008	0.81039	-7.1606	0.83978	-0.65777	0.48465	-7.5072	2.8	-0.19311	0.29934	9.9303	0.29934	0.14018	0.080192	-6.5028	0.47923	9.597	0.080187	0.46522	0.1572	0.79851	0.38049	7.9718	2.7869	8.3051	2.8568	9.7372	1.0049	-0.33329	-14.268	0.4169	3	11	1.2298	7254	1043	1.7532	1.348	0.30057	4.6106
-6.5023	0.37994	1.0043	1.972	0.34656	1.9324	-6.9675	0.32052	2.6295	0.57533	-5.577	0.63097	-7.1606	0.34903	-0.65777	0.089212	-7.5072	2.0029	-0.19311	0.093192	8.2065	0.093192	-1.5836	0.27538	-6.5028	0.356	9.597	0.27538	0.46522	0.063423	-0.92532	0.33395	7.9718	2.0119	6.5813	2.018	8.0133	1.0049	1.3905	-12.544	0.4169	4	13	0.96853	5292	1044	2.4283	1.6555	0.46682	8.8446
-6.5023	0.40547	1.0043	1.7877	0.34656	1.8116	-6.9675	0.42423	2.6295	0.68998	-3.8531	0.75085	-7.1606	0.42664	-0.65777	0.062957	-7.5072	1.801	-0.19311	0.038943	6.4826	0.038945	-3.3075	0.69153	-6.5028	0.40727	9.597	0.69153	0.46522	0.058224	-2.6491	0.67296	7.9718	1.8146	4.8575	1.7826	6.2895	1.0049	3.1144	-10.821	0.4169	3	12	0.9783	7293	1045	2.6565	1.7824	0.49041	10.586
-6.5023	0.66597	1.0043	1.6668	0.34656	1.5701	-6.9675	0.73536	2.6295	0.85774	-2.1293	0.82801	-7.1606	0.73576	-0.65777	0.065896	-7.5072	1.8395	-0.19311	0.032009	4.7588	0.032013	-5.0313	1.3502	-6.5028	0.666	9.597	1.3502	0.46522	0.05972	-4.373	1.3267	7.9718	1.8707	3.1336	1.6806	4.5657	1.0049	4.8382	-9.0968	0.4169	2	8	1.054	12817	1046	2.7104	1.8195	0.48965	11.02
-6.5023	0.25247	1.0043	2.4898	0.34656	2.4155	-6.9675	0.21029	3.6019	0.22509	-7.3008	0.31149	-7.1606	0.34458	-0.65777	0.42906	-7.5072	2.513	-0.19311	0.26417	10.903	0.26417	0.14018	0.079131	-6.5028	0.24556	10.569	0.079129	0.46522	0.17297	0.79851	0.35375	7.9718	2.5006	8.3051	2.537	10.71	1.0049	-0.33329	-14.268	0.4169	4	13	0.98411	3322	1047	1.7532	1.348	0.30056	4.6103
-6.5023	0.24937	1.0043	1.8572	0.34656	1.8116	-6.9675	0.19804	3.6019	0.2335	-5.577	0.26769	-7.1606	0.17298	-0.65777	0.088496	-7.5072	1.8217	-0.19311	0.081952	9.1788	0.081947	-1.5836	0.22354	-6.5028	0.23051	10.569	0.22353	0.46522	0.05042	-0.92532	0.26675	7.9718	1.8296	6.5813	1.912	8.9857	1.0049	1.3905	-12.544	0.4169	4	13	0.76957	2254	1048	2.4281	1.6553	0.46687	8.8434
-6.5023	0.27484	1.0043	1.8379	0.34656	1.8116	-6.9675	0.32052	3.6019	0.34814	-3.8531	0.37593	-7.1606	0.33218	-0.65777	0.062137	-7.5072	1.8048	-0.19311	0.046252	7.455	0.046252	-3.3075	0.71492	-6.5028	0.29596	10.569	0.71492	0.46522	0.071281	-2.6491	0.69393	7.9718	1.8146	4.8575	1.8387	7.2619	1.0049	3.1144	-10.821	0.4169	4	13	0.82816	3530	1049	2.6556	1.7815	0.49065	10.579
-6.5023	0.51404	1.0043	1.6942	0.34656	1.6908	-6.9675	0.52794	3.6019	0.68367	-2.1293	0.69006	-7.1606	0.52775	-0.65777	0.06568	-7.5072	1.7993	-0.19311	0.035759	5.7312	0.035762	-5.0313	1.6019	-6.5028	0.507	10.569	1.6019	0.46522	0.067857	-4.373	1.5614	7.9718	1.8108	3.1336	1.7726	5.5381	1.0049	4.8382	-9.0968	0.4169	4	10	0.96678	8176	1050	2.7056	1.8148	0.49086	10.981
-6.5023	0.82985	1.0043	1.6038	0.34656	1.5973	-6.9675	0.89763	3.6019	1.2625	-0.40546	1.2725	-7.1606	0.89012	-0.65777	0.067096	-7.5072	1.8496	-0.19311	0.030792	4.0073	0.030793	-6.7552	2.7162	-6.5028	0.82929	10.569	2.7162	0.46522	0.058284	-6.0968	2.6737	7.9718	1.8818	1.4098	1.8662	3.8142	1.0049	6.562	-7.373	0.4169	0	4	1.2439	125000	1051	2.7277	1.8337	0.48753	11.161
-6.5023	2.3684	1.0043	1.7002	0.34656	2.3161	-5.0441	2.3349	-0.28768	1.7173	-7.3008	2.3912	-7.1606	2.821	-0.65777	2.3101	-7.5072	3.6529	-2.1165	0.77671	7.0131	0.7767	0.14018	0.39347	-6.5028	2.3003	4.7565	0.39348	-1.4581	1.1586	0.79851	1.0109	6.0485	2.6768	8.3051	3.6353	4.8966	1.0049	-2.2567	-12.345	0.41622	0	2	2.138	962000	1052	2.1922	2.0314	0.079169	7.2084
-6.5023	1.8492	1.0043	1.7267	0.34656	2.396	-5.0441	1.7862	0.68471	1.1998	-7.3008	2.1366	-7.1606	2.9723	-0.65777	2.7706	-7.5072	3.4379	-2.1165	0.96307	7.9855	0.96307	0.14018	0.5811	-6.5028	1.8107	5.7289	0.5811	-1.4581	1.1336	0.79851	1.0382	6.0485	2.5477	8.3051	3.78	5.869	1.0049	-2.2567	-12.345	0.41622	0	2	1.8491	932000	1053	2.1879	2.0305	0.077561	7.1806
-6.5023	1.1766	1.0043	2.349	0.34656	1.6908	-5.0441	1.5085	0.68471	1.4883	-5.577	1.8775	-7.1606	1.9713	-0.65777	0.68418	-7.5072	4.0601	-2.1165	0.43165	6.2617	0.43165	-1.5836	0.097399	-6.5028	1.1424	5.7289	0.097398	-1.4581	0.16332	-0.92532	0.55357	6.0485	4.1693	6.5813	4.3785	4.1452	1.0049	-0.53283	-10.621	0.41622	0	7	1.6818	11249	1054	4.3244	3.3997	0.27198	28.05
-6.5023	1.3179	1.0043	1.8207	0.34656	2.5362	-5.0441	1.3954	1.6571	1.0891	-7.3008	1.9419	-7.1606	3.6723	-0.65777	3.2568	-7.5072	3.2718	-2.1165	1.7882	8.9579	1.7882	0.14018	0.94778	-6.5028	1.3095	6.7012	0.94778	-1.4581	1.1249	0.79851	1.0715	6.0485	2.5107	8.3051	4.0455	6.8414	1.0049	-2.2567	-12.345	0.41622	0	0	1.6836	110000	1055	2.1863	2.0301	0.076948	7.17
-6.5023	0.80909	1.0043	2.5265	0.34656	1.8116	-5.0441	0.98995	1.6571	0.97449	-5.577	1.3957	-7.1606	1.5122	-0.65777	0.61481	-7.5072	3.7922	-2.1165	0.39377	7.2341	0.39377	-1.5836	0.09167	-6.5028	0.80451	6.7012	0.091667	-1.4581	0.15927	-0.92532	0.51538	6.0485	3.861	6.5813	3.9755	5.1176	1.0049	-0.53283	-10.621	0.41622	0	7	1.4179	8078	1056	4.3198	3.3968	0.27172	27.991
-6.5023	0.64026	1.0043	1.9786	0.34656	1.9324	-5.0441	0.67881	1.6571	1.0891	-3.8531	1.1493	-7.1606	0.78291	-0.65777	0.075023	-7.5072	2.13	-2.1165	0.11907	5.5102	0.11907	-3.3075	0.30472	-6.5028	0.60636	6.7012	0.30472	-1.4581	0.077253	-2.6491	0.39024	6.0485	2.1375	4.8575	2.2382	3.3938	1.0049	1.191	-8.8973	0.41622	2	10	1.2448	4665	1057	6.2273	4.2742	0.45695	58.168
-6.5023	0.91368	1.0043	1.9485	0.34656	2.657	-5.0441	0.98995	2.6295	0.91927	-7.3008	2.038	-7.1606	4.399	-0.65777	3.8146	-7.5072	3.1589	-2.1165	2.9121	9.9303	2.9121	0.14018	1.4246	-6.5028	0.90107	7.6736	1.4246	-1.4581	1.1105	0.79851	1.1086	6.0485	2.5284	8.3051	4.3679	7.8138	1.0049	-2.2567	-12.345	0.41622	0	0	1.5777	94270	1058	2.1857	2.03	0.076729	7.1661
-6.5023	0.43322	1.0043	2.7799	0.34656	1.9324	-5.0441	0.5751	2.6295	0.518	-5.577	0.87803	-7.1606	0.97955	-0.65777	0.56624	-7.5072	3.4139	-2.1165	0.37134	8.2065	0.37134	-1.5836	0.089897	-6.5028	0.45366	7.6736	0.089895	-1.4581	0.16506	-0.92532	0.49264	6.0485	3.4576	6.5813	3.5682	6.09	1.0049	-0.53283	-10.621	0.41622	3	11	1.1861	5281	1059	4.3181	3.3957	0.27164	27.969
-6.5023	0.40547	1.0043	1.9345	0.34656	1.9324	-5.0441	0.36768	2.6295	0.57533	-3.8531	0.65786	-7.1606	0.40319	-0.65777	0.067165	-7.5072	1.9179	-2.1165	0.10005	6.4826	0.10005	-3.3075	0.26889	-6.5028	0.40497	7.6736	0.26888	-1.4581	0.065309	-2.6491	0.3174	6.0485	1.9471	4.8575	1.9396	4.3662	1.0049	1.191	-8.8973	0.41622	4	13	0.97888	2924	1060	6.2206	4.2679	0.45752	58.043
-6.5023	0.52254	1.0043	2.1233	0.34656	2.8986	-5.0441	0.98995	3.6019	1.1996	-7.3008	2.2933	-7.1606	5.1895	-0.65777	4.4723	-7.5072	3.1387	-2.1165	4.1633	10.903	4.1633	0.14018	2.0832	-6.5028	0.51581	8.646	2.0832	-1.4581	1.0991	0.79851	1.1419	6.0485	2.5938	8.3051	4.6925	8.7862	1.0049	-2.2567	-12.345	0.41622	1	2	1.6712	72462	1061	2.1855	2.0299	0.07664	7.1646
-6.5023	0.25661	1.0043	2.7672	0.34656	2.0532	-5.0441	0.26397	3.6019	0.2335	-5.577	0.5097	-7.1606	0.56924	-0.65777	0.51569	-7.5072	2.8331	-2.1165	0.33196	9.1788	0.33196	-1.5836	0.076864	-6.5028	0.25448	8.646	0.07686	-1.4581	0.17266	-0.92532	0.45391	6.0485	2.8425	6.5813	2.8676	7.0624	1.0049	-0.53283	-10.621	0.41622	4	13	1.014	2725	1062	4.3174	3.3953	0.2716	27.96
-6.5023	0.27029	1.0043	1.824	0.34656	1.8116	-5.0441	0.25459	3.6019	0.28241	-3.8531	0.28896	-7.1606	0.23154	-0.65777	0.063516	-7.5072	1.7247	-2.1165	0.083099	7.455	0.083098	-3.3075	0.19979	-6.5028	0.27014	8.646	0.19979	-1.4581	0.048918	-2.6491	0.25237	6.0485	1.7319	4.8575	1.7624	5.3385	1.0049	1.191	-8.8973	0.41622	4	13	0.78864	1225	1063	6.218	4.2655	0.45775	57.996
-6.5023	0.27489	1.0043	1.6042	0.34656	1.5701	-5.0441	0.3583	3.6019	0.34814	-2.1293	0.34944	-7.1606	0.31996	-0.65777	0.05008	-7.5072	1.6202	-2.1165	0.045663	5.7312	0.045664	-5.0313	0.66102	-6.5028	0.28787	8.646	0.66102	-1.4581	0.079848	-4.373	0.62225	6.0485	1.6385	3.1336	1.6275	3.6147	1.0049	2.9148	-7.1734	0.41622	4	13	0.75084	1994	1064	6.9213	4.6467	0.48951	71.857
-6.5023	1.5647	1.0043	1.426	0.34656	2.5362	-3.1208	2.1779	0.68471	1.6603	-7.3008	1.1797	-7.1606	1.4847	-0.65777	2.067	-7.5072	2.0948	-4.0398	1.0151	7.9855	1.0151	0.14018	0.39948	-6.5028	1.5557	3.8055	0.39948	-3.3815	1.5205	0.79851	0.97233	4.1251	2.0513	8.3051	1.8017	3.9457	1.0049	-4.18	-10.422	0.41159	0	2	1.7575	400000	1065	2.2964	2.2521	0.01971	7.9105
-6.5023	1.0474	1.0043	1.3285	0.34656	2.657	-3.1208	1.6594	1.6571	1.2038	-7.3008	1.086	-7.1606	1.6975	-0.65777	2.4586	-7.5072	1.8271	-4.0398	1.0181	8.9579	1.0181	0.14018	0.43143	-6.5028	1.0425	4.7779	0.43143	-3.3815	1.4575	0.79851	0.99754	4.1251	1.9614	8.3051	1.9368	4.918	1.0049	-4.18	-10.422	0.41159	0	2	1.497	302000	1066	2.2859	2.2516	0.015249	7.8383
-6.5023	0.55534	1.0043	1.289	0.34656	3.0194	-3.1208	1.3482	2.6295	0.86194	-7.3008	1.0982	-7.1606	2.8792	-0.65777	3.0696	-7.5072	1.6444	-4.0398	1.2587	9.9303	1.2587	0.14018	1.0512	-6.5028	0.55531	5.7503	1.0512	-3.3815	1.4426	0.79851	1.0307	4.1251	1.9962	8.3051	2.2243	5.8904	1.0049	-4.18	-10.422	0.41159	1	2	1.362	211000	1067	2.282	2.2515	0.013552	7.8111
-6.5023	0.79407	1.0043	1.4572	0.34656	2.7778	-3.1208	0.9334	2.6295	0.80462	-5.577	1.2843	-7.1606	2.3308	-0.65777	3.1114	-7.5072	2.0398	-4.0398	0.94457	8.2065	0.94457	-1.5836	0.50286	-6.5028	0.79217	5.7503	0.50286	-3.3815	1.2941	-0.92532	1.1021	4.1251	1.6937	6.5813	2.7606	4.1666	1.0049	-2.4562	-8.6977	0.41159	0	2	1.3419	63274	1068	5.2251	4.9057	0.06511	40.952
-6.5023	0.40547	1.0043	1.2644	0.34656	3.3817	-3.1208	1.6594	3.6019	0.79831	-7.3008	1.2862	-7.1606	4.0602	-0.65777	3.9039	-7.5072	1.5757	-4.0398	2.5111	10.903	2.5111	0.14018	1.7453	-6.5028	0.40587	6.7226	1.7453	-3.3815	1.5366	0.79851	1.0518	4.1251	2.0685	8.3051	2.7086	6.8628	1.0049	-4.18	-10.422	0.41159	1	2	1.4659	135000	1069	2.2805	2.2514	0.012901	7.8007
-6.5023	0.4434	1.0043	1.4657	0.34656	3.1401	-3.1208	0.93342	3.6019	0.79831	-5.577	1.4705	-7.1606	3.3002	-0.65777	3.6393	-7.5072	1.9749	-4.0398	2.2743	9.1788	2.2743	-1.5836	0.99494	-6.5028	0.45047	6.7226	0.99494	-3.3815	1.3155	-0.92532	1.1444	4.1251	1.604	6.5813	3.1014	5.139	1.0049	-2.4562	-8.6977	0.41159	1	2	1.3752	48050	1070	5.2214	4.905	0.064503	40.894
-6.5023	0.27483	1.0043	2.1175	0.34656	1.6908	-3.1208	0.41484	3.6019	0.33973	-3.8531	1.0338	-7.1606	1.4642	-0.65777	1.6756	-7.5072	2.5214	-4.0398	0.78095	7.455	0.78095	-3.3075	0.23584	-6.5028	0.28453	6.7226	0.23584	-3.3815	0.36399	-2.6491	1.0396	4.1251	2.876	4.8575	3.6857	3.4152	1.0049	-0.73237	-6.9739	0.41159	3	7	0.97857	4428	1071	10.588	8.5188	0.24285	168.14
-6.5023	1.3139	1.0043	1.3294	0.34656	2.5363	-1.1974	0.77315	2.6295	0.80462	-7.3008	0.91024	-7.1606	1.168	-0.65777	2.0517	-7.5072	1.8007	-5.9632	1.1708	9.9303	1.1708	0.14018	0.41087	-6.5028	1.3091	3.8269	0.41086	-5.3049	1.4573	0.79851	0.97633	2.2018	1.5226	8.3051	1.5836	3.9671	1.0049	-6.1034	-8.4982	0.38249	0	2	1.2779	299000	1072	2.3108	2.2901	0.009028	8.0096
-6.5023	0.79061	1.0043	1.2324	0.34656	2.7778	-1.1974	0.78252	3.6019	0.74099	-7.3008	0.90333	-7.1606	1.5112	-0.65777	2.4089	-7.5072	1.5375	-5.9632	1.6193	10.903	1.6193	0.14018	0.46874	-6.5028	0.78901	4.7993	0.46874	-5.3049	1.3399	0.79851	0.99655	2.2018	1.6298	8.3051	1.7029	4.9395	1.0049	-6.1034	-8.4982	0.38249	1	3	1.2046	201000	1073	2.3006	2.29	0.0046136	7.9389
-6.5023	1.8427	1.0043	1.3138	2.6197	1.4277	-6.9675	1.6688	-0.28768	1.9448	-7.3008	2.3166	-4.8875	1.9121	1.6154	0.57828	-7.5072	2.6121	2.08	0.82633	7.0131	0.82632	2.4133	0.62496	-6.5028	1.832	6.6798	0.62496	0.46522	0.27522	0.79851	0.47303	7.9718	2.4066	8.3051	2.9223	9.0932	1.0049	-0.33329	-14.268	1.7955	0	5	1.7524	93925	1074	1.1212	0.96454	0.16242	1.8856
-6.5023	1.5759	1.0043	1.2754	2.6197	1.4709	-6.9675	1.8762	-0.28768	1.6008	-5.577	1.6299	-4.8875	1.7145	1.6154	0.3829	-7.5072	2.0111	2.08	0.2691	5.2893	0.2691	0.68951	1.0132	-6.5028	1.5689	6.6798	1.0132	0.46522	0.28815	-0.92532	0.77709	7.9718	2.288	6.5813	1.8121	7.3693	1.0049	1.3905	-12.544	1.7955	0	4	1.5715	63433	1075	1.5533	1.342	0.15745	3.6192
-6.5023	1.1807	1.0043	1.3262	2.6197	1.4277	-6.9675	1.1502	-0.28768	1.8875	-3.8531	1.974	-4.8875	1.2086	1.6154	0.20096	-7.5072	1.7135	2.08	0.15863	3.5655	0.15863	-1.0343	1.1547	-6.5028	1.1755	6.6798	1.1547	0.46522	0.05494	-2.6491	0.92145	7.9718	1.814	4.8575	1.9307	5.6455	1.0049	3.1144	-10.821	1.7955	0	4	1.4911	39333	1076	1.7019	1.5322	0.11073	4.3447
-6.5023	1.0463	1.0043	1.3029	2.6197	1.3501	-6.9675	1.0465	-0.28768	0.91296	-2.1293	1.0915	-4.8875	1.1312	1.6154	0.18863	-7.5072	1.5559	2.08	0.1555	1.8416	0.1555	-2.7582	0.98277	-6.5028	1.0393	6.6798	0.98277	0.46522	0.033811	-4.373	0.92319	7.9718	1.6103	3.1336	1.2785	3.9217	1.0049	4.8382	-9.0968	1.7955	0	4	1.1251	26055	1077	1.751	1.5849	0.10475	4.5988
-6.5023	1.4533	1.0043	1.4231	2.6197	1.4277	-6.9675	1.2596	0.68471	1.3736	-7.3008	1.85	-4.8875	1.7621	1.6154	0.69516	-7.5072	2.5591	2.08	0.90222	7.9855	0.90222	2.4133	0.64604	-6.5028	1.4483	7.6522	0.64604	0.46522	0.24109	0.79851	0.40699	7.9718	2.4042	8.3051	2.8625	10.066	1.0049	-0.33329	-14.268	1.7955	0	5	1.4646	85801	1078	1.1211	0.96449	0.16235	1.8852
-6.5023	1.1799	1.0043	1.246	2.6197	1.4277	-6.9675	1.5651	0.68471	1.087	-5.577	1.16	-4.8875	1.466	1.6154	0.43671	-7.5072	1.8586	2.08	0.31949	6.2617	0.31949	0.68951	1.0758	-6.5028	1.1737	7.6522	1.0758	0.46522	0.34106	-0.92532	0.73344	7.9718	2.1422	6.5813	1.6393	8.3417	1.0049	1.3905	-12.544	1.7955	0	5	1.2776	64683	1079	1.5528	1.3418	0.15726	3.6169
-6.5023	1.0291	1.0043	1.2952	2.6197	1.4277	-6.9675	1.1502	0.68471	1.3205	-3.8531	1.5037	-4.8875	1.156	1.6154	0.23148	-7.5072	1.654	2.08	0.1854	4.5379	0.1854	-1.0343	1.1248	-6.5028	1.0131	7.6522	1.1248	0.46522	0.061004	-2.6491	0.85966	7.9718	1.8054	4.8575	1.7021	6.6179	1.0049	3.1144	-10.821	1.7955	0	4	1.2877	39224	1080	1.6993	1.5315	0.10959	4.3315
-6.5023	0.95026	1.0043	1.2594	2.6197	1.3209	-6.9675	0.96621	0.68471	0.89657	-2.1293	0.89292	-4.8875	1.1103	1.6154	0.20516	-7.5072	1.5193	2.08	0.16511	2.814	0.1651	-2.7582	1.1001	-6.5028	0.9448	7.6522	1.1001	0.46522	0.039085	-4.373	1.0036	7.9718	1.575	3.1336	1.2722	4.8941	1.0049	4.8382	-9.0968	1.7955	0	4	1.0477	241000	1081	1.7368	1.5813	0.098362	4.5249
-6.5023	1.1529	1.0043	1.5921	2.6197	1.3946	-6.9675	0.96761	1.6571	1.0993	-7.3008	1.5196	-4.8875	1.7176	1.6154	0.82635	-7.5072	2.6358	2.08	1.0005	8.9579	1.0005	2.4133	0.67938	-6.5028	1.1088	8.6246	0.67937	0.46522	0.21726	0.79851	0.36337	7.9718	2.5231	8.3051	2.9411	11.038	1.0049	-0.33329	-14.268	1.7955	0	4	1.2877	551000	1082	1.121	0.96447	0.16232	1.885
-6.5023	0.90405	1.0043	1.2534	2.6197	1.3946	-6.9675	1.3091	1.6571	0.94768	-5.577	0.88638	-4.8875	1.3586	1.6154	0.51381	-7.5072	1.8029	2.08	0.39889	7.2341	0.39889	0.68951	1.1518	-6.5028	0.89922	8.6246	1.1518	0.46522	0.41512	-0.92532	0.70977	7.9718	2.1027	6.5813	1.5635	9.3141	1.0049	1.3905	-12.544	1.7955	0	5	1.1159	443000	1083	1.5526	1.3417	0.15719	3.616
-6.5023	0.78551	1.0043	1.1972	2.6197	1.4277	-6.9675	1.0465	1.6571	1.1465	-3.8531	1.1277	-4.8875	1.1194	1.6154	0.30426	-7.5072	1.5446	2.08	0.2406	5.5102	0.2406	-1.0343	1.2	-6.5028	0.78212	8.6246	1.2	0.46522	0.082505	-2.6491	0.87516	7.9718	1.7638	4.8575	1.4638	7.5903	1.0049	3.1144	-10.821	1.7955	0	4	1.1219	33371	1084	1.6983	1.5312	0.10917	4.3265
-6.5023	0.81096	1.0043	1.2403	2.6197	1.3501	-6.9675	0.94279	1.6571	1.0318	-2.1293	1.0082	-4.8875	1.0406	1.6154	0.21581	-7.5072	1.4792	2.08	0.17319	3.7864	0.1732	-2.7582	1.2763	-6.5028	0.81111	8.6246	1.2762	0.46522	0.04524	-4.373	1.1554	7.9718	1.5441	3.1336	1.3046	5.8664	1.0049	4.8382	-9.0968	1.7955	0	4	1.064	35232	1085	1.7315	1.5799	0.095932	4.4969
-6.5023	0.93793	1.0043	1.2814	2.6197	1.3501	-6.9675	0.94279	1.6571	0.91716	-0.40546	0.72607	-4.8875	1.1014	1.6154	0.20517	-7.5072	1.5245	2.08	0.16643	2.0625	0.16642	-4.482	2.0975	-6.5028	0.93388	8.6246	2.0975	0.46522	0.041372	-6.0968	1.9469	7.9718	1.5656	1.4098	1.5062	4.1426	1.0049	6.562	-7.373	1.7955	1	5	1.0259	25902	1086	1.752	1.5928	0.099945	4.6041
-6.5023	0.643	1.0043	1.3242	2.6197	1.3501	-6.9675	1.0465	2.6295	0.7431	-5.577	0.71236	-4.8875	1.2751	1.6154	0.6461	-7.5072	1.8115	2.08	0.5051	8.2065	0.5051	0.68951	1.2545	-6.5028	0.63603	9.597	1.2545	0.46522	0.47206	-0.92532	0.69926	7.9718	2.1091	6.5813	1.5702	10.286	1.0049	1.3905	-12.544	1.7955	3	9	0.96988	45594	1087	1.5526	1.3417	0.15715	3.6156
-6.5023	0.54478	1.0043	1.1477	2.6197	1.4277	-6.9675	0.94279	2.6295	0.91507	-3.8531	0.84582	-4.8875	1.1435	1.6154	0.46101	-7.5072	1.4537	2.08	0.34925	6.4826	0.34925	-1.0343	1.4039	-6.5028	0.54519	9.597	1.4039	0.46522	0.14223	-2.6491	0.94458	7.9718	1.7402	4.8575	1.3314	8.5627	1.0049	3.1144	-10.821	1.7955	1	6	0.97065	26324	1088	1.698	1.5311	0.10901	4.3246
-6.5023	0.66642	1.0043	1.2047	2.6197	1.3501	-6.9675	0.83908	2.6295	0.91927	-2.1293	0.90231	-4.8875	1.0116	1.6154	0.28142	-7.5072	1.4539	2.08	0.21565	4.7588	0.21565	-2.7582	1.4755	-6.5028	0.6661	9.597	1.4755	0.46522	0.064385	-4.373	1.2901	7.9718	1.5411	3.1336	1.3414	6.8388	1.0049	4.8382	-9.0968	1.7955	1	6	0.9803	30645	1089	1.7294	1.5794	0.095007	4.4864
-6.5023	0.90229	1.0043	1.2692	2.6197	1.3501	-6.9675	0.94279	2.6295	1.259	-0.40546	1.081	-4.8875	1.0488	1.6154	0.22188	-7.5072	1.4859	2.08	0.17555	3.0349	0.17555	-4.482	2.4394	-6.5028	0.89809	9.597	2.4394	0.46522	0.046785	-6.0968	2.2674	7.9718	1.5382	1.4098	1.6292	5.115	1.0049	6.562	-7.373	1.7955	0	4	1.1341	30571	1090	1.7407	1.5899	0.094802	4.5449
-6.5023	0.40547	1.0043	1.4476	2.6197	1.3501	-6.9675	0.83908	3.6019	0.56902	-5.577	0.58299	-4.8875	1.2898	1.6154	0.90358	-7.5072	1.8986	2.08	0.67924	9.1788	0.67924	0.68951	1.5744	-6.5028	0.40513	10.569	1.5744	0.46522	0.51856	-0.92532	0.71071	7.9718	2.2236	6.5813	1.634	11.259	1.0049	1.3905	-12.544	1.7955	3	8	0.86571	31647	1091	1.5525	1.3417	0.15714	3.6155
-6.5023	0.40547	1.0043	1.0687	2.6197	1.4709	-6.9675	0.83908	3.6019	0.97029	-3.8531	0.75182	-4.8875	1.2926	1.6154	0.74099	-7.5072	1.372	2.08	0.55403	7.455	0.55403	-1.0343	2.1752	-6.5028	0.40686	10.569	2.1752	0.46522	0.23834	-2.6491	1.1838	7.9718	1.7392	4.8575	1.2854	9.5351	1.0049	3.1144	-10.821	1.7955	1	6	0.9177	19588	1092	1.6978	1.531	0.10894	4.3239
-6.5023	0.51823	1.0043	1.1811	2.6197	1.3501	-6.9675	0.63166	3.6019	0.97029	-2.1293	0.78404	-4.8875	0.96823	1.6154	0.3781	-7.5072	1.3865	2.08	0.29153	5.7312	0.29154	-2.7582	1.9971	-6.5028	0.51473	10.569	1.9971	0.46522	0.09309	-4.373	1.655	7.9718	1.5173	3.1336	1.4501	7.8112	1.0049	4.8382	-9.0968	1.7955	2	7	0.9059	22611	1093	1.7287	1.5792	0.094655	4.4824
-6.5023	0.78676	1.0043	1.2309	2.6197	1.3501	-6.9675	0.83908	3.6019	1.4862	-0.40546	1.2795	-4.8875	1.0354	1.6154	0.25404	-7.5072	1.484	2.08	0.195	4.0073	0.195	-4.482	2.702	-6.5028	0.78314	10.569	2.702	0.46522	0.05632	-6.0968	2.497	7.9718	1.5402	1.4098	1.7483	6.0874	1.0049	6.562	-7.373	1.7955	0	4	1.1621	33770	1094	1.7364	1.5889	0.092846	4.5225
-6.5023	1.7066	1.0043	1.5874	2.6197	1.79	-5.0441	1.7159	-0.28768	2.2887	-7.3008	1.5757	-4.8875	1.7424	1.6154	1.6695	-7.5072	3.1575	0.15668	2.1108	7.0131	2.1108	2.4133	1.4949	-6.5028	1.6916	4.7565	1.4949	-1.4581	1.6067	0.79851	0.69419	6.0485	1.9173	8.3051	3.3953	7.1698	1.0049	-2.2567	-12.345	1.7938	0	1	1.7774	230000	1095	1.3985	1.329	0.052267	2.9335
-6.5023	1.5892	1.0043	1.1903	2.6197	1.4277	-5.0441	1.4048	-0.28768	1.4289	-5.577	2.102	-4.8875	1.9592	1.6154	0.59823	-7.5072	2.2377	0.15668	0.94213	5.2893	0.94213	0.68951	0.58605	-6.5028	1.5861	4.7565	0.58605	-1.4581	0.29074	-0.92532	0.47775	6.0485	2.0513	6.5813	2.5565	5.446	1.0049	-0.53283	-10.621	1.7938	0	5	1.5238	61618	1096	2.7635	2.3967	0.15305	11.456
[truncated: 6,957 more rows]
[truncated: 6 more columns]

## Sheet: MVSK_dm
ton	ton_median_rel_dist	toff	toff_median_rel_dist	km	km_median_rel_dist	dm	dm_median_rel_dist	kp	kp_median_rel_dist	dp	dp_median_rel_dist	S	S_median_rel_dist	B	B_median_rel_dist	P_ON	P_ON_median_rel_dist	E[RNA ct]	E[RNA ct]_median_rel_dist	kp / dp	kp / dp_median_rel_dist	S / dp	S / dp_median_rel_dist	burst frequency	burst frequency_median_rel_dist	kp/dm	kp/dm_median_rel_dist	ton/dm	ton/dm_median_rel_dist	ton/dp	ton/dp_median_rel_dist	toff/dm	toff/dm_median_rel_dist	toff/dp	toff/dp_median_rel_dist	avg_protein_ct	TON+TOFF	dp / dm	dp + dm	RNA_fano	num_params_fit	num_param_rat_fit	avg_true_param_fit	num_param_sets	file_num
[truncated: 8,053 more rows]

[truncated: 5 more sheets: MVSK_dp, MVSK_dm_dp, MV, MVS, rel_err_ACES_vs_Friedman]
